# Supplementary material for: Electrochemical intramolecular C–H/N–H functionalization for the synthesis of isoxazolidine-fused isoquinolin-1(2H)-ones
Source: Royal Society of Chemistry journal article supplement (doi:10.1039/c9gc03290h), 2019-11-26
Supplement: c9gc03290h1.pdf [file c9gc03290h1.pdf]

## Supporting Information

# Electrochemical Intramolecular C-H/N-H Functionalization for the Synthesis of Isoxazolidine- Fused Isoquinolin-1(2*H*)-ones

Lin-Bao Zhang, Rui-Sen Geng, Zi-Chen Wang, Guang-Yi Ren, Li-Rong Wen,\* and Ming Li\*

State Key Laboratory Base of Eco-Chemical Engineering, College of Chemistry and Molecular Engineering, Qingdao University of Science and Technology, Qingdao 266042, P. R. China. E-mail: wenlirong@qust.edu.cn; liming928@qust.edu.cn

### Table of the contents

|                                                                        |    |
|------------------------------------------------------------------------|----|
| Supporting Information.....                                            | 1  |
| General methods .....                                                  | 1  |
| Preparation of starting materials .....                                | 2  |
| Optimization of the Reaction Conditions <sup>a</sup> .....             | 7  |
| Synthesis of compounds <b>2</b> .....                                  | 8  |
| Gram-scale reaction .....                                              | 8  |
| Control experiments.....                                               | 8  |
| Kinetic Isotope Effect (KIE) Study.....                                | 9  |
| Cyclic Voltammetry Studies.....                                        | 10 |
| Characterization of compounds <b>2</b> .....                           | 11 |
| References.....                                                        | 26 |
| Computational Details .....                                            | 26 |
| <sup>1</sup> H NMR and <sup>13</sup> C NMR spectra of <b>2</b> . ..... | 34 |

## General methods

Unless noted, all commercial reagents and solvents were used without further purification. Melting points were recorded on a RY-1 microscopic melting apparatus and uncorrected. NMR spectra were recorded in CDCl<sub>3</sub> on 400 MHz or 500 MHz spectrometers. <sup>1</sup>H NMR chemical shifts ( $\delta$ ) are reported in parts per million relative to tetramethylsilane (0 ppm) or residual CHCl<sub>3</sub> (7.26 ppm). <sup>13</sup>C NMR chemical shifts are reported relative to the center line signal of the CDCl<sub>3</sub> triplet at 77.0 ppm. The following abbreviations are used for multiplicities: s = singlet, d = doublet, t = triplet, q = quartet, dd = doublet of doublets, and m = multiplet. Mass spectra were obtained on an Ultima Global spectrometer with an ESI source. Silica gel (200–300 mesh) for column chromatography and silica GF254 for TLC were produced by Qingdao Marine Chemical Company (China). DC power supply DPS-305CF was used for all experiments. Cyclic voltammograms were obtained on a CHI 660E potentiostat.

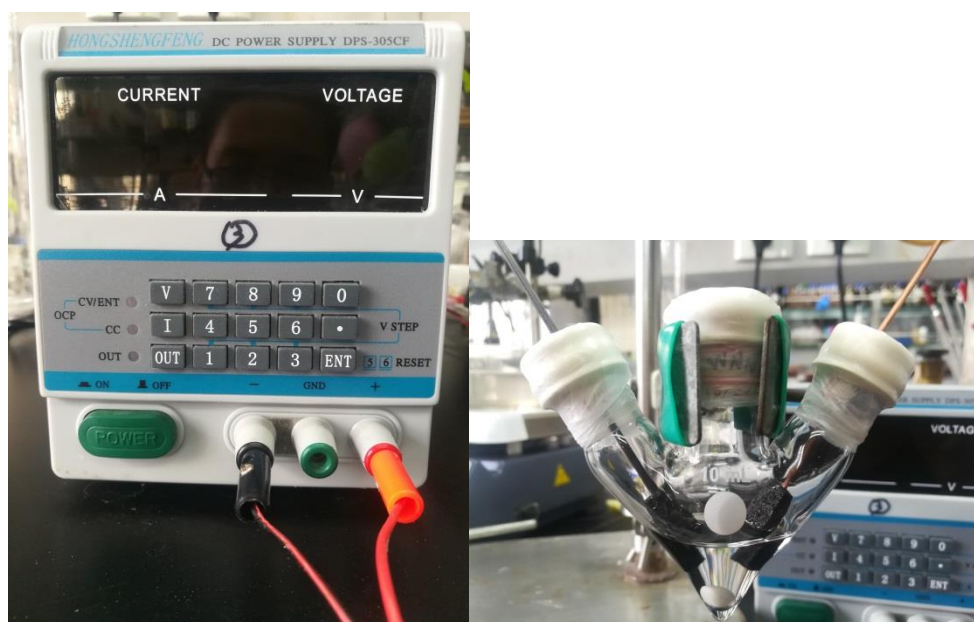

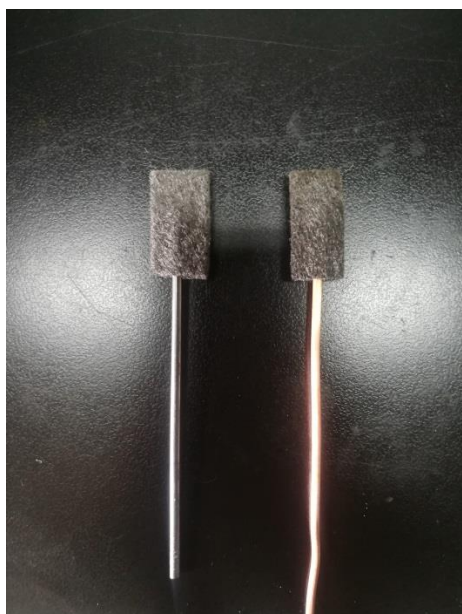

## Preparation of starting materials

### General procedure A for the synthesis of substrate 1a-1af, 1an-1ap. <sup>[1]</sup>

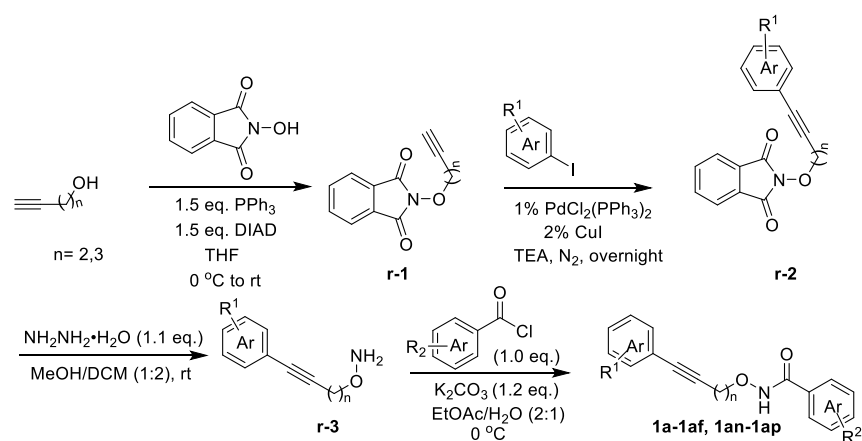

1) To a 50 mL Schlenk tube, under  $N_2$ , was added *N*-Hydroxyphthalimide (6.5 mmol, 1.3 equiv.), triphenylphosphine ( $PPh_3$ , 7.5 mmol, 1.5 equiv.), 30 mL of anhydrous THF, and then alcohol (5 mmol, 1.0 equiv.) was added. The tube is immersed in an ice bath, and diisopropyl azodicarboxylate (DIAD, 7.5 mmol, 1.5 equiv.) in 5 mL of anhydrous THF was added dropwise, upon completion of the addition, the flask is removed from the ice bath and the solution is allowed to stir at room temperature overnight. The solvent was removed and the residue purified by flash column chromatography on silica gel (using 30% EtOAc/petroleum ether as eluent) to give compound **r-1**.

2) To a 50 mL Schlenk tube, under  $N_2$ , was added  $PdCl_2(PPh_3)_2$  (0.05 mmol, 0.01 equiv.), CuI (0.1

mmol, 0.02 equiv.), iodobenzene (6 mmol, 1.2 equiv.), compound **r-1** (5 mmol, 1.0 equiv.) and anhydrous TEA (10 mL), then the tube was placed in a pre-heated oil bath (60 °C). The reaction was stirred overnight and then cooled to room temperature and checked by TLC. The reaction is filtered over celite, washing with dichloromethane. The solvent was removed and the residue purified by flash column chromatography on silica gel (using 30% EtOAc/petroleum ether as eluent) to give compound **r-2**.

3) In a 50 mL round-bottom flask was charged alkoxyphthalimide starting material (5.0 mmol), solvent 20 mL [MeOH/DCM (ratio 1:2)], and then slowly added hydrazine monohydrate (5.5 mmol, 1.1 equiv.), then stirred at room temperature for 1 h. Upon completion (indicated by TLC), the solvent was then removed under reduce pressure. The residue was washed with DCM and filtered, collect the DCM part and removed the solvent to give the crude *O*-alkoxylamine **r-3**, which was used in next step without further purification.

4) The crude *O*-alkoxylamine which was obtained in the previous step was added to a biphasic mixture of K<sub>2</sub>CO<sub>3</sub> (10 mmol, 2.0 equiv.) in a 2:1 mixture of EtOAc: H<sub>2</sub>O (0.2 M). The resulting solution was cooled to 0 °C followed by dropwise addition of the acid chloride dissolved in a minimum amount of EtOAc. The flask containing the acid chloride was then rinsed with additional EtOAc. The reaction was allowed to stir at same temperature for 1 h. Upon completion (indicated by TLC), the phases were separated and the aqueous phase was extracted twice with EtOAc. The combined organic layers were dried over Na<sub>2</sub>SO<sub>4</sub>, filtered, and evaporated under reduced pressure. The residue was purified by flash column chromatography on silica gel (using 30% EtOAc/petroleum ether as eluent) to give product **1a-1af**, **1an-1ap**.

5) Acid chloride was prepared according to the literature <sup>[2]</sup>.

To a suspension of the carboxylic acid (5 mmol, 1.0 equiv.) in dry CH<sub>2</sub>Cl<sub>2</sub> (5 mL) at room temperature under a nitrogen atmosphere was added a catalytic amount of dry DMF (2 drops). Oxalyl chloride (7.5 mmol, 1.5 equiv., 2 M in DCM) was added dropwise over about 10 minutes with care as effervescence occurs. The reaction was allowed to stir at room temperature until completion which was judged to be when no further effervescence could be seen and in some cases,

the solution became homogeneous. The solvent was then removed under reduced pressure to afford the corresponding crude acid chloride.

**General procedure B for the synthesis of substrate 1ag-1al.** <sup>[1],[3]</sup>

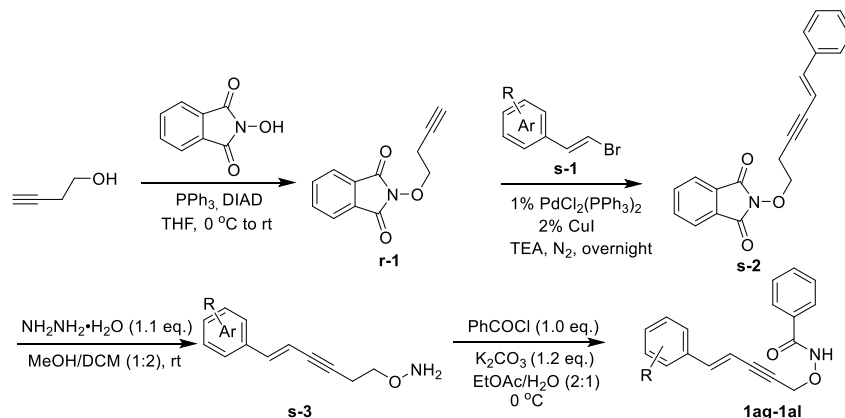

1) To a 50 mL Schlenk tube, under  $N_2$ , was added *N*-hydroxyphthalimide (1.054g, 6.5 mmol), triphenylphosphine ( $PPh_3$ , 1.967 g, 7.5 mmol), 30 mL of anhydrous THF, and then alcohol (0.47 mL, 5 mmol) was added. The tube is immersed in an ice bath, and diisopropyl azodicarboxylate (DIAD, 1.48 mL, 7.5 mmol) in 5 mL of anhydrous THF was added dropwise, upon completion of the addition, the flask is removed from the ice bath and the solution is allowed to stir at room temperature overnight. The solvent was removed and the residue purified by flash column chromatography on silica gel (using 30% EtOAc/petroleum ether as eluent) to give compound **r-1**.

2) To a 50 mL Schlenk tube, under  $N_2$ , was added  $PdCl_2(PPh_3)_2$  (0.05 mmol, 0.01 equiv.),  $CuI$  (0.1 mmol, 0.02 equiv.), **s-1** (6 mmol, 1.2 equiv.) and anhydrous TEA (10 mL), then the tube was placed in a pre-heated oil bath (60 °C). The reaction was stirred overnight and then cooled to room temperature and checked by TLC. The reaction is filtered over celite, washing with dichloromethane. The solvent was removed and the residue was purified by flash column chromatography on silica gel (using 30% EtOAc/petroleum ether as eluent) to give compound **s-2**.

3) In a 50 mL round-bottom flask was charged compound **s-2** (5.0 mmol), solvent 20 mL [MeOH/DCM (ratio 1:2)], and then slowly added hydrazine monohydrate (5.5 mmol, 1.1 equiv.), then stirred at room temperature for 1 h. Upon completion (indicated by TLC), the solvent was then removed under reduce pressure. The residue was washed with DCM and filtered, collect the DCM part and removed the solvent to give the crude *O*-alkoxylamine **s-3**, which was used in next step without further purification.

4) The crude *O*-alkoxylamine which was obtained in the previous step was added to a biphasic mixture of  $K_2CO_3$  (10 mmol, 2.0 equiv.) in a 2:1 mixture of EtOAc:  $H_2O$  (0.2 M). The resulting solution was cooled to 0 °C followed by dropwise addition of the acid chloride dissolved in a minimum amount of EtOAc. The flask containing the acid chloride was then rinsed with additional

EtOAc. The reaction was allowed to stir at same temperature for 1 h. Upon completion (indicated by TLC), the phases were separated and the aqueous phase was extracted twice with EtOAc. The combined organic layers were dried over Na<sub>2</sub>SO<sub>4</sub>, filtered and evaporated under reduced pressure. The residue was purified by flash column chromatography on silica gel (using 30% EtOAc/petroleum ether as eluent) to give product **1ag-1al**.

**General procedure C for the synthesis of  $\beta$ -bromostyrene compounds.** <sup>[4]</sup>

**1ag, 1ah, 1aj, 1ak** was prepared according to general procedure B, **s-1** was prepared according to procedure C.

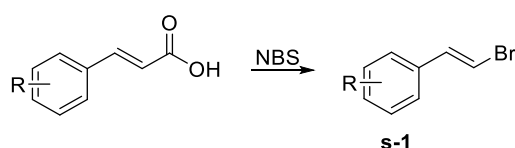

To a solution of cinnamic acid (5.0 mmol, 1.0 equiv.) in methylene chloride (5 mL) was added Et<sub>3</sub>N (0.25 mmol, 0.05 equiv.) at room temperature and stirred for 5 minutes. *N*-bromosuccinimide (6 mmol, 1.2 equiv.) was added in one portion and stirred for 30 minutes. The solvent was removed under reduced pressure. The crude was purified by flash column chromatography (silica gel hexanes) to afford product **s-1**.

**General procedure D for the synthesis of  $\beta$ -bromostyrene compounds.** <sup>[5]</sup>

**1ai** was prepared according to general procedure B, **s-1** was prepared according to procedure D.

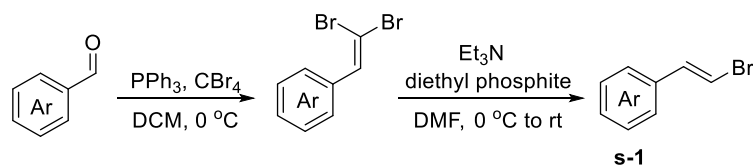

1) A flame-dried round-bottom flask equipped with a stir bar under argon was charged with the corresponding aldehyde (10 mmol, 1.0 equiv.), CBr<sub>4</sub> (15 mmol, 1.5 equiv.) and DCM (80 mL). The reaction mixture was cooled at 0 °C, then a solution of PPh<sub>3</sub> (30 mmol, 3.0 equiv.) in DCM (80 mL) was added dropwise over 20 min. After another 1 h at 0 °C, the mixture was concentrated under reduced pressure to half of the volume. Next, pentane was added and triphenylphosphine oxide precipitated out. The mixture was filtered and concentrated under reduced pressure. Pentane was added again to further precipitate the triphenylphosphine oxide. After filtration and evaporation of the solvent, the crude dibromide was used directly in the next step without any further purification.

2) To a mixture of the above dibromide and diethyl phosphite (30 mmol, 3.0 equiv.) in DMF (10 mL) was added Et<sub>3</sub>N (30 mmol, 3.0 equiv.) at 0 °C. The reaction was then warmed to room temperature and stirred overnight. The mixture was quenched with water. The aqueous layer was extracted with DCM. The combined organics were washed with brine, dried over Na<sub>2</sub>SO<sub>4</sub>, and concentrated in vacuo. The product **s-1** was purified by chromatography.

**General procedure E for the reaction of bromofluorination of terminal alkynes.** <sup>[6]</sup>



mixture of  $K_2CO_3$  (10 mmol, 2.0 equiv.) in a 2:1 mixture of EtOAc:  $H_2O$  (0.2 M). The resulting solution was cooled to 0 °C followed by dropwise addition of the acid chloride dissolved in a minimum amount of EtOAc. The flask containing the acid chloride was then rinsed with additional EtOAc. The reaction was allowed to stir at same temperature for 1 h. Upon completion (indicated by TLC), the phases were separated and the aqueous phase was extracted twice with EtOAc. The combined organic layers were dried over  $Na_2SO_4$ , filtered, and evaporated under reduced pressure. The residue was purified by flash column chromatography on silica gel (using 30% EtOAc/petroleum ether as eluent) to give product **1a**.

### Optimization of the Reaction Conditions<sup>a</sup>

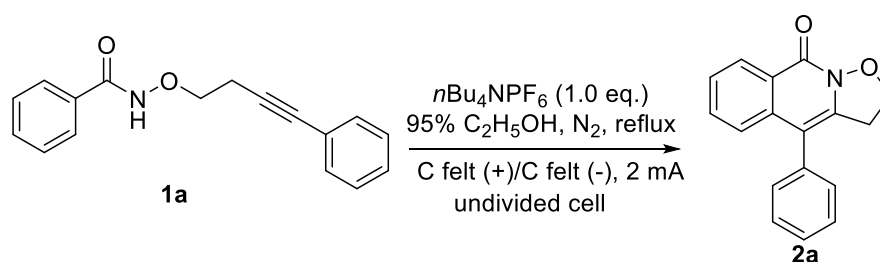

| Entry | Variation from standard conditions                 | Yield (%) <sup>b</sup> |
|-------|----------------------------------------------------|------------------------|
| 1     | none                                               | 93                     |
| 2     | 5 mA                                               | 62                     |
| 3     | 3 mA                                               | 75                     |
| 4     | Pt(+) Pt(-)                                        | 40                     |
| 5     | C(+) C(-)                                          | 63                     |
| 6     | C(+) Pt(-)                                         | 65                     |
| 7     | MeCN as the solvent                                | 81                     |
| 8     | MeOH as the solvent                                | 85                     |
| 9     | EtOH as the solvent                                | 90                     |
| 10    | without <i>n</i> -Bu <sub>4</sub> NBF <sub>4</sub> | trace                  |
| 11    | under air                                          | n.r                    |
| 12    | no electric current                                | n.r                    |
| 13    | Reaction at RT                                     | 16                     |
| 14    | Reaction at 50 °C                                  | 62                     |
| 15    | Reaction at 70 °C                                  | 90                     |

<sup>a</sup>Reaction conditions: **1a** (0.1 mmol), *n*-Bu<sub>4</sub>NBF<sub>4</sub> (0.1 mmol), 95% EtOH (5.0 mL) in undivided cell with carbon felt anode and cathode (2.0 cm × 1.0 cm × 0.5 cm), constant current = 2.0 mA, nitrogen, reflux, 4 h. <sup>b</sup>Isolated yield of **2a**. n.r = no reaction.



## Synthesis of compounds 2

A 10-mL three-necked flask was charged with the substrate **1** (0.1 mmol, 1.0 equiv) and  $n\text{Bu}_4\text{NPF}_6$  (0.1 mmol, 1.0 equiv). The flask was equipped with a rubber stopper, a carbonic felt anode (2 cm x 1 cm x 0.5 cm) and a carbonic felt cathode (2 cm x 1 cm x 0.5 cm) and then flushed with nitrogen. EtOH (5.0 mL) were added. The constant current electrolysis was carried out at 80 °C (oil bath temperature) until complete consumption of the substrate (monitored by TLC). The reaction mixture was cooled to RT and concentrated under reduced pressure. The residue was chromatographed through silica gel eluting with petroleum ether /EtOAc to give the product.

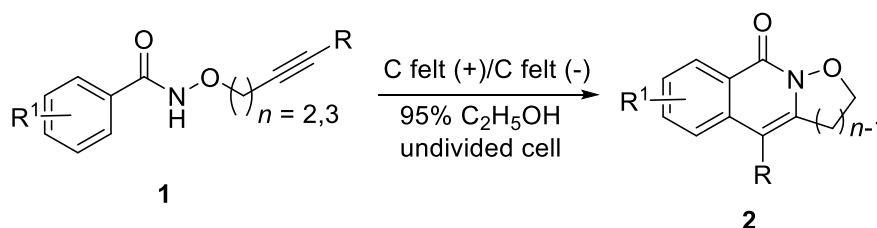

## Gram-scale reaction

A 250-mL three-necked flask was charged with the substrate **1** (5 mmol, 1.0 equiv) and  $n\text{Bu}_4\text{NPF}_6$  (5 mmol, 1.0 equiv). The flask was equipped with a rubber stopper, a carbonic felt anode (4 cm x 2 cm x 0.5 cm) and a carbonic felt cathode (4 cm x 2 cm x 0.5 cm) and then flushed with argon. EtOH (150 mL) were added. The constant current (2 mA) electrolysis was carried out at 80 °C (oil bath temperature) until complete consumption of the substrate (monitored by TLC). The reaction mixture was cooled to RT and concentrated under reduced pressure. The residue was chromatographed through silica gel eluting with petroleum ether /EtOAc to give the product.

## Control experiments

TEMPO/BHT inhibiting experiment:

A 10-mL three-necked flask was charged with the substrate **1** (0.1 mmol, 1.0 equiv), TEMPO (0.3 mmol, 3.0 equiv) or BHT (0.3 mmol, 3.0 equiv) and  $n\text{Bu}_4\text{NPF}_6$  (0.1 mmol, 1.0 equiv). The flask was equipped with a rubber stopper, a carbonic felt anode (2 cm x 1 cm x 0.5 cm) and a carbonic felt cathode (2 cm x 1 cm x 0.5 cm) and then flushed with nitrogen. EtOH (5.0 mL) were added. The constant current (2 mA) electrolysis was carried out at 80 °C (oil bath temperature) for 4 h. (monitored by TLC).

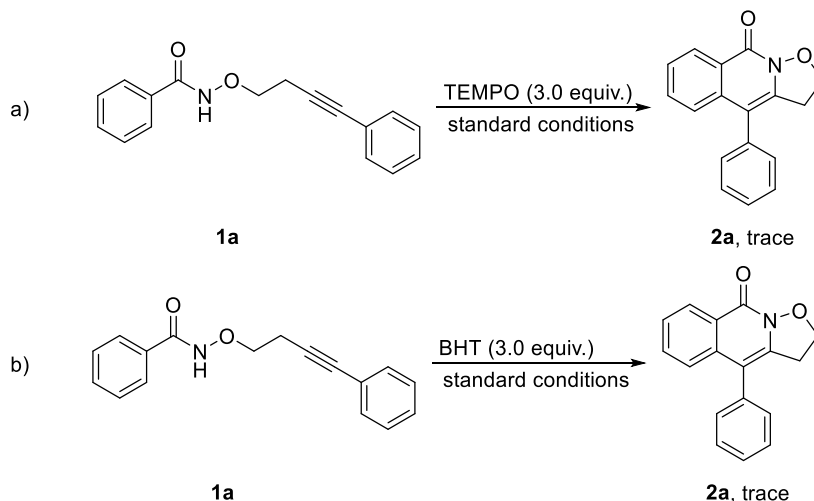

## Kinetic Isotope Effect (KIE) Study

### Intermolecular Kinetic Isotopic Effect

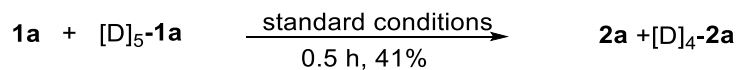

A 10-mL three-necked flask was charged with the substrate **1a** (0.1 mmol, 1.0 equiv),  $[\text{D}]_5\text{-1a}$  (0.1 mmol, 1.0 equiv) and  $n\text{Bu}_4\text{NPF}_6$  (0.1 mmol, 1.0 equiv). The flask was equipped with a rubber stopper, a carbonic felt anode (2 cm x 1 cm x 0.5 cm) and a carbonic felt cathode (2 cm x 1 cm x 0.5 cm) and then flushed with nitrogen. EtOH (5.0 mL) were added. The constant current (2 mA) electrolysis was carried out at 80 °C (oil bath temperature). The reaction was stopped after 0.5 h, then the products was isolated by using column chromatography on silica gel. A mixture of the products was analyzed by  $^1\text{H}$  NMR spectroscopy. A Kinetic isotopic effect of this reaction was determined to be  $k\text{H}/k\text{D} = 0.8$  (0.44/0.56).

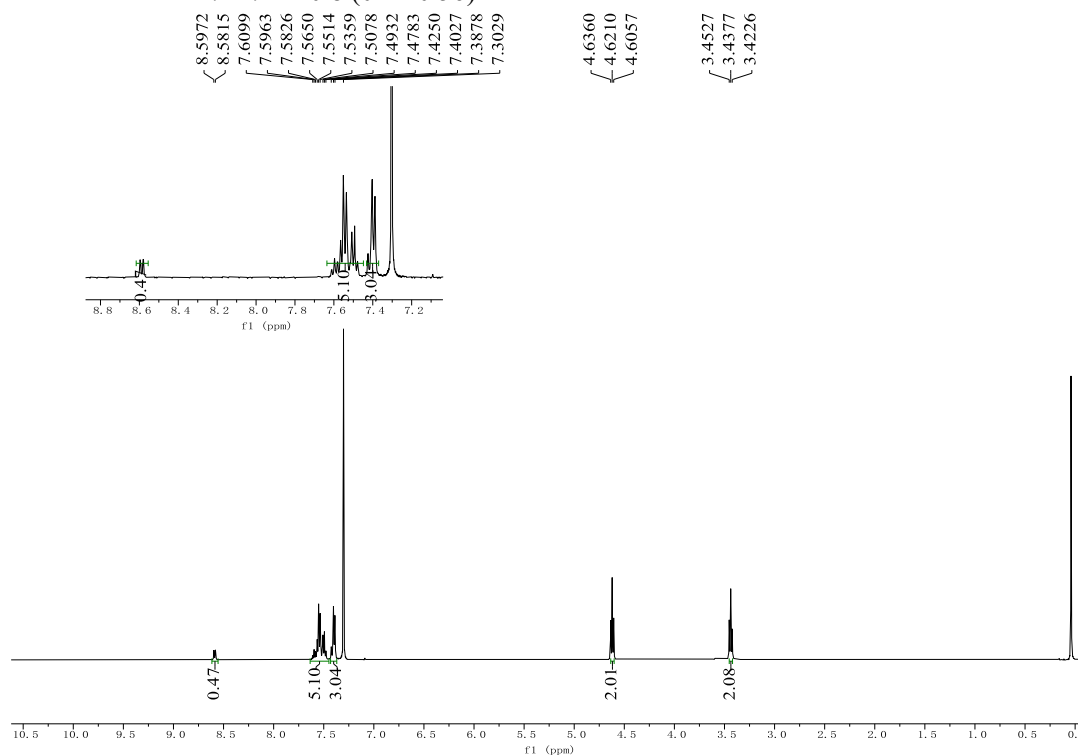

## Two parallel reactions for KIE value measurement

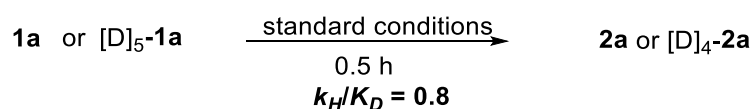

A 10-mL three-necked flask was charged with the substrate **1a** (0.1 mmol, 1.0 equiv) and *n*Bu<sub>4</sub>NPF<sub>6</sub> (0.1 mmol, 1.0 equiv). The flask was equipped with a rubber stopper, a carbonic felt anode (2 cm x 1 cm x 0.5 cm) and a carbonic felt cathode (2 cm x 1 cm x 0.5 cm) and then flushed with nitrogen. EtOH (5.0 mL) were added. The constant current (2 mA) electrolysis was carried out at 80 °C (oil bath temperature). The reaction was stopped after 0.5 h, then the product **2a** (38%, 10 mg) was isolated by using column chromatography on silica gel.

A 10-mL three-necked flask was charged with the substrate [**D**]<sub>5</sub>-**1a** (0.1 mmol, 1.0 equiv) and *n*Bu<sub>4</sub>NPF<sub>6</sub> (0.1 mmol, 1.0 equiv). The flask was equipped with a rubber stopper, a carbonic felt anode (2 cm x 1 cm x 0.5 cm) and a carbonic felt cathode (2 cm x 1 cm x 0.5 cm) and then flushed with nitrogen. EtOH (5.0 mL) were added. The constant current (2 mA) electrolysis was carried out at 80 °C (oil bath temperature). The reaction was stopped after 0.5 h, then the product [**D**]<sub>4</sub>-**2a** (48.6%, 13 mg) was isolated by using column chromatography on silica gel.

## Cyclic Voltammetry Studies

The cyclic voltammograms were recorded in an electrolyte of *n*Bu<sub>4</sub>NPF<sub>6</sub> (0.02 M) in EtOH using glassy carbon electrode working electrode, Pt wire, and SCE as counter and reference electrodes at 100 mV/s scan rate.

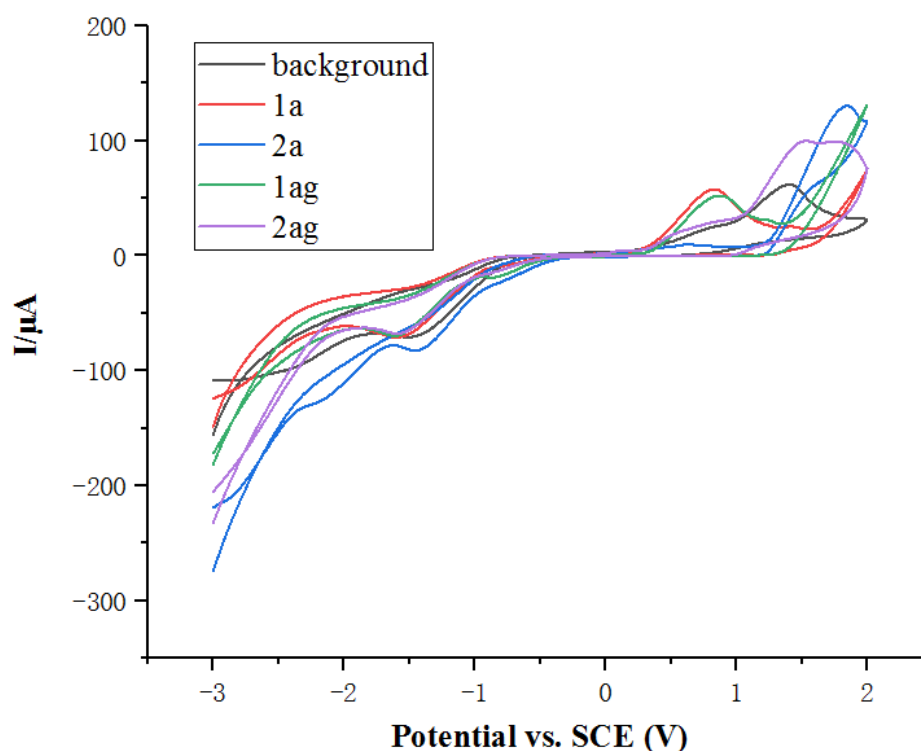

background): *n*Bu<sub>4</sub>NPF<sub>6</sub> (0.02M). 1a): **1a** (0.02 M), *n*Bu<sub>4</sub>NPF<sub>6</sub> (0.02M). 2a): **2a** (0.02M),

$n\text{Bu}_4\text{NPF}_6$  (0.02M). 1ag): **1ag** (0.02 M),  $n\text{Bu}_4\text{NPF}_6$  (0.02M). 2ag): **2ag** (0.02M),  $n\text{Bu}_4\text{NPF}_6$  (0.02M).

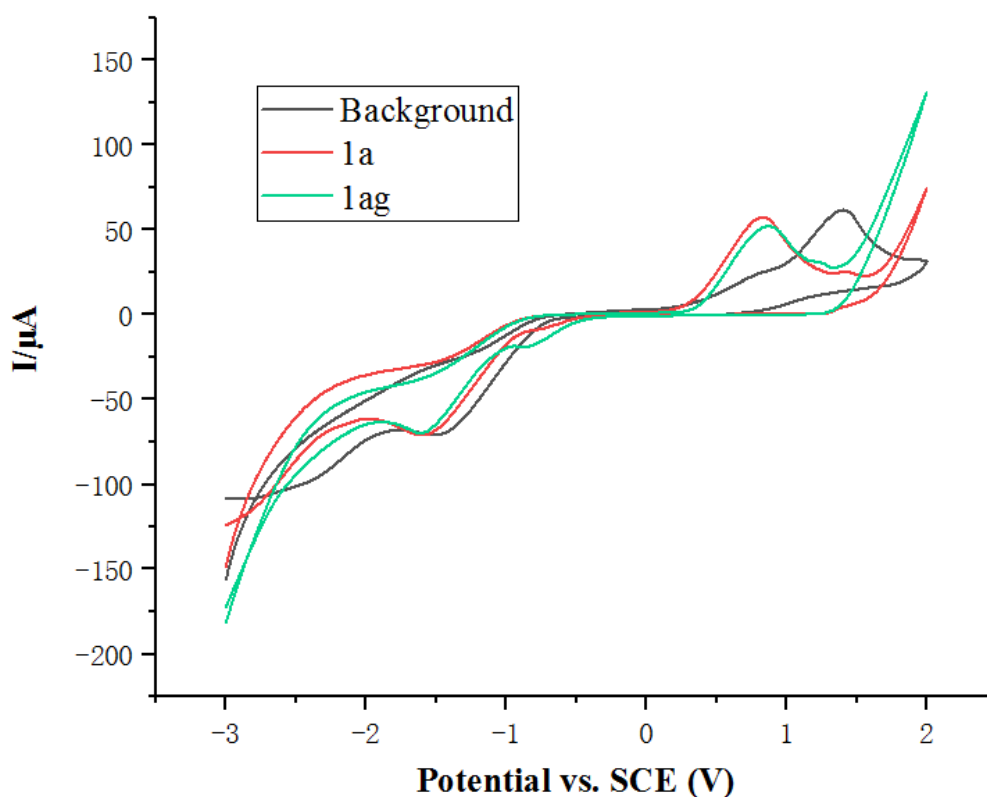

background):  $n\text{Bu}_4\text{NPF}_6$  (0.02M). 1a): **1a** (0.02 M),  $n\text{Bu}_4\text{NPF}_6$  (0.02M). 1ag): **1ag** (0.02M),  $n\text{Bu}_4\text{NPF}_6$  (0.02M).

## Characterization of compounds 2

**4-phenyl-2,3-dihydro-9H-isoxazolo[2,3-*b*]isoquinolin-9-one (2a).**<sup>[7]</sup>

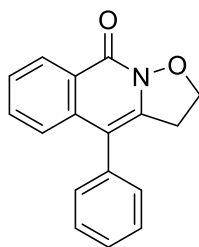

White solid, 49 mg, 93 % yield, M.p. = 206-208°C;

<sup>1</sup>H NMR (CDCl<sub>3</sub>, 400 MHz): δ 8.54 (d, *J* = 7.1 Hz, 1H), 7.59-7.43 (m, 5H), 7.38-7.32 (m, 3H), 4.58 (t, *J* = 7.6 Hz, 2H), 3.39 (t, *J* = 7.6 Hz, 2H); <sup>13</sup>C NMR (CDCl<sub>3</sub>, 100 MHz): δ 153.95, 136.20, 135.02, 132.52, 131.63, 130.31, 128.93, 128.10, 127.47, 126.32, 126.30, 124.71, 113.03, 69.55, 32.46.

**6-fluoro-4-phenyl-2,3-dihydro-9H-isoxazolo[2,3-*b*]isoquinolin-9-one (2b).**

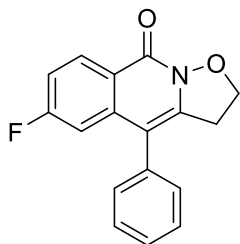

White solid, 48 mg, 85% yield, M.p. = 230-232 °C;

**<sup>1</sup>H NMR** (CDCl<sub>3</sub>, 500 MHz):  $\delta$  8.15 (d,  $J$  = 9.3, 2.5 Hz, 1H), 7.53 – 7.48 (m, 2H), 7.48 – 7.42 (m, 1H), 7.38 – 7.31 (m, 3H), 7.28 – 7.24 (m, 1H), 4.58 (t,  $J$  = 7.6 Hz, 2H), 3.38 (t,  $J$  = 7.6 Hz, 2H); **<sup>13</sup>C NMR** (CDCl<sub>3</sub>, 125 MHz):  $\delta$  161.10 (d,  $^1J_{C,F}$  = 248.2 Hz), 152.94, 134.69, 132.76, 131.90, 130.15, 128.98, 128.24, 127.87 (d,  $^3J_{C,F}$  = 7.6 Hz), 127.14 (d,  $^3J_{C,F}$  = 7.4 Hz), 120.31 (d,  $^2J_{C,F}$  = 23.5 Hz), 112.66, 112.46 (d,  $^2J_{C,F}$  = 23.2 Hz), 69.74, 32.25; **HRMS** (ESI)  $m/z$  calcd for C<sub>17</sub>H<sub>12</sub>FNNaO<sub>2</sub><sup>+</sup> [M+Na]<sup>+</sup> 304.0750, found 304.0754.

**6-chloro-4-phenyl-2,3-dihydro-9H-isoxazolo[2,3-b]isoquinolin-9-one (2c).**<sup>[7]</sup>

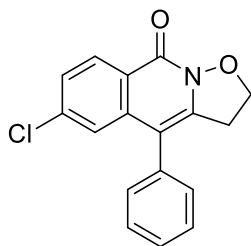

Pale yellow solid, 54 mg, 91% yield, M.p. = 236-238 °C;

**<sup>1</sup>H NMR** (500 MHz CDCl<sub>3</sub>):  $\delta$  8.47 (d,  $J$  = 3.6 Hz, 1H), 7.53-7.49 (m, 2H), 7.48 – 7.42 (m, 2H), 7.34-7.28 (m, 3H), 4.58 (t,  $J$  = 7.6 Hz, 2H), 3.39 (t,  $J$  = 7.6 Hz, 2H); **<sup>13</sup>C NMR** (125 MHz, CDCl<sub>3</sub>):  $\delta$  152.76, 134.51, 134.43, 132.89, 132.53, 132.02, 130.14, 129.01, 128.29, 127.29, 126.71, 126.34, 112.60, 69.69, 32.36.

**6-bromo-4-phenyl-2,3-dihydro-9H-isoxazolo[2,3-b]isoquinolin-9-one (2d).**

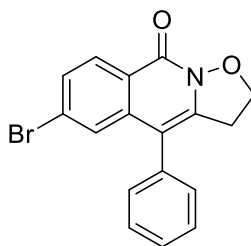

White solid, 58 mg, 85% yield, M.p. = 204-206 °C;

**<sup>1</sup>H NMR** (CDCl<sub>3</sub>, 400 MHz):  $\delta$  8.65 (d,  $J$  = 2.1 Hz, 1H), 7.64 – 7.57 (m, 1H), 7.55 – 7.43 (m, 3H), 7.36 – 7.30 (m, 2H), 7.23 (d,  $J$  = 8.7 Hz, 1H), 4.59 (t,  $J$  = 7.6 Hz, 2H), 3.39 (t,  $J$  = 7.6 Hz, 2H); **<sup>13</sup>C NMR** (CDCl<sub>3</sub>, 100 MHz):  $\delta$  152.72, 134.90, 134.81, 134.43, 133.12, 130.20, 129.91, 129.08, 128.36, 127.60, 126.52, 120.50, 112.73, 69.74, 32.47; **HRMS** (ESI)  $m/z$  calcd for C<sub>17</sub>H<sub>12</sub>BrNNaO<sub>2</sub><sup>+</sup> [M+Na]<sup>+</sup> 363.9949, found 363.9949.

**6-iodo-4-phenyl-2,3-dihydro-9H-isoxazolo[2,3-b]isoquinolin-9-one (2e).**

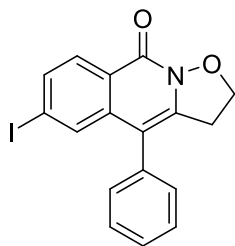

White solid, 54 mg, 70% yield, M.p. = 218-220 °C

**<sup>1</sup>H NMR** (500 MHz, CDCl<sub>3</sub>): δ 8.87 (d, *J* = 1.7 Hz, 1H), 7.85 – 7.74 (m, 1H), 7.51 (t, *J* = 7.4 Hz, 2H), 7.46 (t, *J* = 7.3 Hz, 1H), 7.32 (d, *J* = 7.1 Hz, 2H), 7.09 (d, *J* = 8.6 Hz, 1H), 4.59 (t, *J* = 7.6 Hz, 2H), 3.38 (t, *J* = 7.6 Hz, 2H); **<sup>13</sup>C NMR** (125 MHz, CDCl<sub>3</sub>): δ 150.61, 138.42, 134.21, 133.40, 132.46, 131.39, 128.27, 127.15, 126.43, 125.79, 124.54, 110.85, 89.54, 67.78, 30.59; **HRMS** (ESI) *m/z* calcd for C<sub>17</sub>H<sub>12</sub>INNaO<sub>2</sub><sup>+</sup> [M+Na]<sup>+</sup> 411.9810, found 411.9808.

**5-phenyl-7-(trifluoromethyl)-3,4-dihydro-[1,2]oxazino[2,3-b]isoquinolin-10(2H)-one(2f).**<sup>[7]</sup>

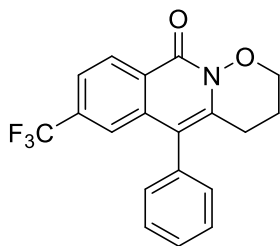

Pale yellow solid, 24 mg, 35% yield, M.p. = 219-221 °C;

**<sup>1</sup>H NMR** (CDCl<sub>3</sub>, 400 MHz): δ 8.66 (d, *J* = 8.6 Hz, 1H), 7.75 – 7.61 (m, 2H), 7.57-7.45 (m, 3H), 7.36-7.32 (m, 2H), 7.28 (d, *J* = 9.8 Hz, 1H), 4.62 (t, *J* = 7.6 Hz, 2H), 3.43 (t, *J* = 7.6 Hz, 2H); **<sup>13</sup>C NMR** (CDCl<sub>3</sub>, 125 MHz): **<sup>13</sup>C NMR** (CDCl<sub>3</sub>, 100 MHz): δ 153.13, 136.20, 134.28, 133.97, 133.46 (q, <sup>2</sup>*J*<sub>C,F</sub> = 34.9 Hz), 130.15, 129.29, 129.19 (q, <sup>1</sup>*J*<sub>C,F</sub> = 275.1 Hz), 128.65, 128.40, 122.38 (q, <sup>3</sup>*J*<sub>C,F</sub> = 3.5 Hz), 122.03 (q, <sup>3</sup>*J*<sub>C,F</sub> = 4.3 Hz), 112.98, 69.76, 32.56.

**6-methyl-4-phenyl-2,3-dihydro-9H-isoxazolo[2,3-b]isoquinolin-9-one (2g).**<sup>[7]</sup>

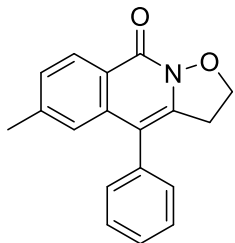

Pale yellow solid, 48mg, 86% yield, M.p. = 219-221 °C;

**<sup>1</sup>H NMR** (CDCl<sub>3</sub>, 500 MHz): δ 8.34 (s, 1H), 7.50 (t, *J* = 7.5 Hz, 2H), 7.44 (t, *J* = 6.9 Hz, 1H), 7.36 (d, *J* = 8.5 Hz, 1H), 7.34 (d, *J* = 7.8 Hz, 2H), 7.27 (d, *J* = 8.2 Hz, 1H), 4.57 (t, *J* = 7.5 Hz, 2H), 3.38 (t, *J* = 7.6 Hz, 2H), 2.48 (s, 3H); **<sup>13</sup>C NMR** (CDCl<sub>3</sub>, 125 MHz): δ 153.90, 136.50, 135.16, 133.90, 133.17, 131.51, 130.27, 128.86, 128.00, 127.00, 126.23, 124.65, 113.02, 109.98, 69.58, 32.32, 21.20.

**6-methoxy-4-phenyl-2,3-dihydro-9H-isoxazolo[2,3-b]isoquinolin-9-one (2h).**<sup>[7]</sup>

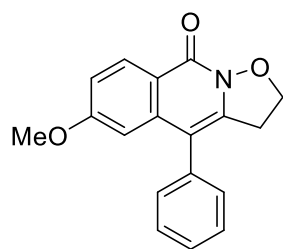

Pale yellow solid, 47 mg, 80% yield, M.p. = 160-162 °C;

<sup>1</sup>H NMR (500 MHz, CDCl<sub>3</sub>): δ 7.90 (d, *J* = 2.7 Hz, 1H), 7.47 (t, *J* = 7.3 Hz, 2H), 7.42 (t, *J* = 7.4 Hz, 1H), 7.35 – 7.30 (m, 2H), 7.30 – 7.25 (m, 1H), 7.13 (dd, *J* = 9.0, 2.7 Hz, 1H), 4.56 (t, *J* = 7.5 Hz, 2H), 3.91 (s, 3H), 3.36 (t, *J* = 7.6 Hz, 2H); <sup>13</sup>C NMR (125 MHz, CDCl<sub>3</sub>): δ 158.33, 153.43, 135.12, 130.19, 130.07, 128.81, 127.97, 127.53, 126.28, 122.21, 113.01, 107.13, 69.71, 55.71, 32.13.

**6-(tert-butyl)-4-phenyl-2,3-dihydro-9H-isoxazolo[2,3-b]isoquinolin-9-one (2i).**

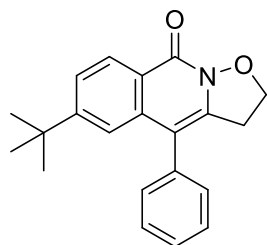

White solid, 58 mg, 91% yield, M.p. = 206-208 °C;

<sup>1</sup>H NMR (500 MHz, CDCl<sub>3</sub>): δ 8.52 (d, *J* = 2.0 Hz, 1H), 7.61 (dd, *J* = 8.6, 2.1 Hz, 1H), 7.49 (t, *J* = 7.3 Hz, 2H), 7.44 (t, *J* = 7.3 Hz, 1H), 7.38 – 7.29 (m, 3H), 4.56 (t, *J* = 7.5 Hz, 2H), 3.38 (t, *J* = 7.5 Hz, 2H), 1.38 (s, 9H); <sup>13</sup>C NMR (125 MHz, CDCl<sub>3</sub>): δ 154.10, 149.69, 135.13, 133.83, 131.63, 130.22, 129.64, 128.80, 127.94, 125.99, 124.49, 123.29, 112.58, 69.52, 34.94, 32.27, 31.24. HRMS (ESI) *m/z* calcd for C<sub>21</sub>H<sub>21</sub>NNaO<sub>2</sub><sup>+</sup> [M+Na]<sup>+</sup> 342.1470, found 342.1470.

**4,6-diphenyl-2,3-dihydro-9H-isoxazolo[2,3-b]isoquinolin-9-one (2j).**

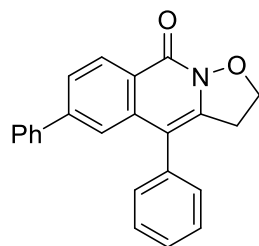

White solid, 58 mg, 85% yield, M.p. = 160-162 °C;

<sup>1</sup>H NMR (400 MHz, CDCl<sub>3</sub>): δ 8.76 (d, *J* = 2.0 Hz, 1H), 7.77 (dd, *J* = 8.6, 2.1 Hz, 1H), 7.69 (d, *J* = 7.4 Hz, 2H), 7.53 – 7.40 (m, 6H), 7.40 – 7.33 (m, 3H), 4.58 (t, *J* = 7.6 Hz, 2H), 3.40 (t, *J* = 7.6 Hz, 2H); <sup>13</sup>C NMR (100 MHz, CDCl<sub>3</sub>): δ 154.01, 139.68, 139.05, 135.13, 134.96, 132.55, 130.51, 130.32, 128.98, 128.92, 128.15, 127.76, 127.23, 126.64, 125.38, 125.34, 112.90, 69.67, 32.45. HRMS (ESI) *m/z* calcd for C<sub>23</sub>H<sub>17</sub>NNaO<sub>2</sub><sup>+</sup> [M+Na]<sup>+</sup> 362.1157, found 362.1159.

**7-methyl-4-phenyl-2,3-dihydro-9H-isoxazolo[2,3-b]isoquinolin-9-one (2k).**<sup>[7]</sup>

**6-methyl-5-phenyl-3,4-dihydro-[1,2]oxazino[2,3-b]isoquinolin-10(2H)-one (2k').**<sup>[7]</sup>

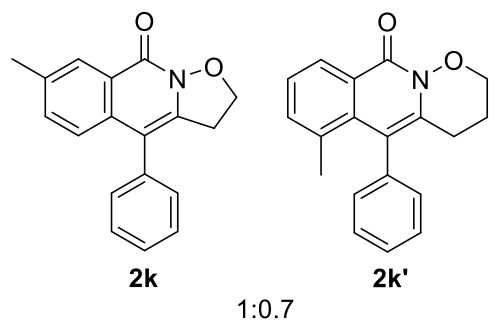

White solid; 53mg, 95% yield;

<sup>1</sup>H NMR (500 MHz CDCl<sub>3</sub>):  $\delta$  8.49 (d,  $J$  = 7.0 Hz, 0.68H), 8.33 (s, 1H), 7.54 – 7.22 (m, 12H), 4.56 (t,  $J$  = 7.3 Hz, 2H), 4.50 (t,  $J$  = 7.6 Hz, 1.46H), 3.38 (t,  $J$  = 7.3 Hz, 2H), 3.20 (t,  $J$  = 7.4 Hz, 1.41H), 2.47 (s, 3H), 1.85 (s, 2.19H); <sup>13</sup>C NMR (125 MHz, CDCl<sub>3</sub>):  $\delta$  154.07, 153.83, 139.16, 136.44, 135.52, 135.10, 134.67, 134.24, 133.83, 133.40, 133.12, 131.46, 130.21, 128.81, 128.53, 127.95, 127.78, 127.44, 126.94, 126.10, 126.03, 124.60, 112.96, 69.55, 69.37, 33.03, 32.28, 23.83, 21.17.

**7-chloro-4-phenyl-2,3-dihydro-9H-isoxazolo[2,3-b]isoquinolin-9-one (2l).**<sup>[7]</sup>

**6-chloro-5-phenyl-3,4-dihydro-[1,2]oxazino[2,3-b]isoquinolin-10(2H)-one (2l').**<sup>[7]</sup>

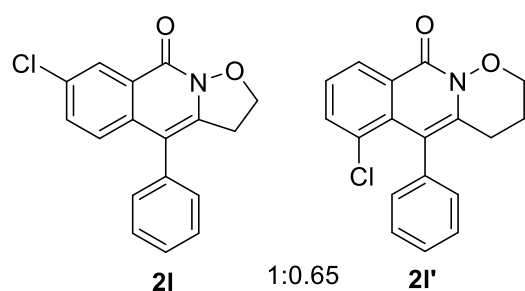

White solid; 58mg, 97% yield;

<sup>1</sup>H NMR (500 MHz, CDCl<sub>3</sub>):  $\delta$  8.55-8.52 (m, 0.58H), 8.51 (d,  $J$  = 2.3 Hz, 1H), 7.60 – 7.58 (m, 0.59H), 7.53 – 7.26 (m, 3.84H), 7.42 – 7.37 (m, 11H), 7.35 – 7.31 (m, 2.54H), 4.59 (t,  $J$  = 7.6 Hz, 2H), 4.55 (t, 1.24H), 3.39 (t,  $J$  = 7.6 Hz, 2H), 3.25 (t, 1.29H); <sup>13</sup>C NMR (125 MHz, CDCl<sub>3</sub>):  $\delta$  153.17, 152.81, 137.67, 135.22, 135.06, 134.52, 134.47, 132.86, 132.61, 132.52, 132.06, 130.55, 130.18, 130.14, 129.01, 128.82, 128.28, 128.26, 127.69, 127.36, 126.98, 126.78, 126.49, 126.32, 112.60, 111.49, 69.66, 69.49, 33.20, 32.37.

**8-fluoro-4-phenyl-2,3-dihydro-9H-isoxazolo[2,3-b]isoquinolin-9-one (2m).**

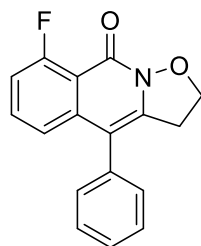

White solid, 39mg, 69% yield, M.p. = 180-182 °C;



**<sup>1</sup>H NMR** (400 MHz, CDCl<sub>3</sub>): δ 8.36 (d, *J* = 8.1 Hz, 1H), 7.46 – 7.37 (m, 4H), 7.32 (d, *J* = 5.9 Hz, 2H), 7.26 – 7.18 (m, 1H), 4.56 (t, *J* = 7.6 Hz, 2H), 3.30 (t, *J* = 7.7 Hz, 2H); **<sup>13</sup>C NMR** (100 MHz, CDCl<sub>3</sub>): δ 158.34 (d, <sup>1</sup>*J*<sub>C,F</sub> = 254.8 Hz), 152.91, 137.14, 134.57, 129.37, 129.34, 128.49, 128.27, 127.73, 126.91 (d, <sup>3</sup>*J*<sub>C,F</sub> = 8.4 Hz), 125.11 (d, <sup>3</sup>*J*<sub>C,F</sub> = 10.5 Hz), 123.60, 118.40 (d, <sup>2</sup>*J*<sub>C,F</sub> = 21.8 Hz), 109.25, 69.64, 32.68; **HRMS** (ESI) *m/z* calcd for C<sub>17</sub>H<sub>12</sub>FNNaO<sub>2</sub><sup>+</sup> [M+Na]<sup>+</sup> 304.0750, found 304.0754.

**8-chloro-4-phenyl-2,3-dihydro-9H-isoxazolo[2,3-*b*]isoquinolin-9-one (2n).**<sup>[7]</sup>

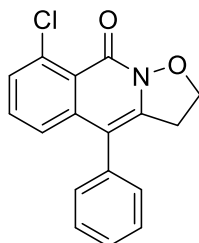

White solid, 55 mg, 92% yield, M.p. = 207-209 °C;

**<sup>1</sup>H NMR** (500 MHz, CDCl<sub>3</sub>): δ 8.51 (d, *J* = 8.0 Hz, 1H), 7.56 (d, *J* = 7.6 Hz, 1H), 7.40-7.32 (m, 4H), 7.27 (d, *J* = 6.7 Hz, 2H), 4.54 (t, *J* = 7.6 Hz, 2H), 3.24 (t, *J* = 7.6 Hz, 2H); **<sup>13</sup>C NMR** (125 MHz, CDCl<sub>3</sub>) δ 153.12, 137.66, 135.25, 135.03, 132.48, 130.51, 130.18, 128.78, 128.24, 127.67, 126.94, 126.47, 111.44, 69.50, 33.19.

**8-bromo-4-phenyl-2,3-dihydro-9H-isoxazolo[2,3-*b*]isoquinolin-9-one (2o).**

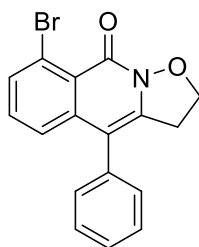

White solid, 58 mg, 85% yield, M.p. = 196-198°C;

**<sup>1</sup>H NMR** (500 MHz, CDCl<sub>3</sub>): δ 8.57 (d, *J* = 8.0 Hz, 1H), 7.81 (d, *J* = 7.6 Hz, 1H), 7.40-7.38 (m, 3H), 7.29-7.26 (m, 3H), 4.53 (t, *J* = 7.7 Hz, 2H), 3.23 (t, *J* = 7.7 Hz, 2H); **<sup>13</sup>C NMR** (125 MHz, CDCl<sub>3</sub>): δ 153.15, 139.20, 137.14, 135.40, 133.55, 130.80, 128.96, 128.34, 127.88, 127.65, 126.78, 118.83, 112.30, 69.52, 33.37; **HRMS** (ESI) *m/z* calcd for C<sub>17</sub>H<sub>12</sub>BrNNaO<sub>2</sub><sup>+</sup> [M+Na]<sup>+</sup> 363.9949, found 363.9947.

**8-methyl-4-phenyl-2,3-dihydro-9H-isoxazolo[2,3-*b*]isoquinolin-9-one (2p).**

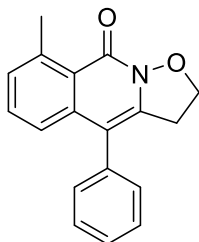

White solid, 29 mg, 53% yield, M.p. = 180-182 °C;

**<sup>1</sup>H NMR** (500 MHz, CDCl<sub>3</sub>): δ 8.49 (d, *J* = 8.7 Hz, 1H), 7.46 – 7.40 (m, 3H), 7.38 – 7.32 (m, 2H), 7.33 – 7.28 (m, 2H), 4.53 (t, *J* = 7.6 Hz, 2H), 3.22 (t, *J* = 7.6 Hz, 2H), 1.87 (s, 3H); **<sup>13</sup>C NMR** (125

MHz, CDCl<sub>3</sub>):  $\delta$  154.15, 139.23, 135.59, 134.72, 134.30, 133.43, 130.22, 128.59, 127.84, 127.51, 126.18, 126.11, 113.06, 69.41, 33.09, 23.87; **HRMS** (ESI)  $m/z$  calcd for C<sub>18</sub>H<sub>15</sub>NNaO<sub>2</sub><sup>+</sup> [M+Na]<sup>+</sup> 300.1000, found 300.1002.

**5,7-dimethyl-4-phenyl-2,3-dihydro-9H-isoxazolo[2,3-b]isoquinolin-9-one (2q).**

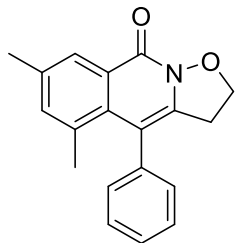

White solid, 41 mg, 70% yield, M.p. = 179-181 °C;

**<sup>1</sup>H NMR** (500 MHz, CDCl<sub>3</sub>):  $\delta$  8.29 (s, 1H), 7.45-7.35 (m, 3H), 7.30 – 7.26 (m, 2H), 7.17 (s, 1H), 4.51 (td,  $J$  = 7.6, 1.2 Hz, 2H), 3.19 (t,  $J$  = 7.6 Hz, 2H), 2.42 (s, 3H), 1.82 (s, 3H); **<sup>13</sup>C NMR** (125 MHz, CDCl<sub>3</sub>):  $\delta$  154.03, 139.27, 137.10, 136.04, 134.51, 132.36, 131.98, 130.14, 128.49, 127.70, 127.48, 125.67, 112.98, 69.38, 32.88, 23.65, 20.85; **HRMS** (ESI)  $m/z$  calcd for C<sub>19</sub>H<sub>17</sub>NNaO<sub>2</sub><sup>+</sup> [M+Na]<sup>+</sup> 314.1157, found 314.1158.

**7-methoxy-8-methyl-4-phenyl-2,3-dihydro-9H-isoxazolo[2,3-b]isoquinolin-9-one (2r).**

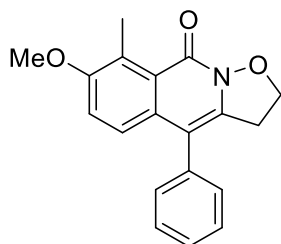

Yellow solid, 33mg, 53% yield, M.p. = 179-181 °C;

**<sup>1</sup>H NMR** (400 MHz, CDCl<sub>3</sub>):  $\delta$  7.51 – 7.40 (m, 3H), 7.31 (d,  $J$  = 6.7 Hz, 2H), 7.18 – 7.09 (m, 2H), 4.51 (t,  $J$  = 7.5 Hz, 2H), 3.86 (s, 3H), 3.30 (t,  $J$  = 7.5 Hz, 2H), 2.93 (s, 3H); **<sup>13</sup>C NMR** (100 MHz, CDCl<sub>3</sub>):  $\delta$  155.97, 155.23, 135.91, 131.59, 130.41, 130.09, 129.70, 129.23, 128.85, 127.88, 125.68, 123.42, 115.53, 112.37, 69.20, 56.38, 32.35, 13.26.; **HRMS** (ESI)  $m/z$  calcd for C<sub>19</sub>H<sub>17</sub>NNaO<sub>3</sub><sup>+</sup> [M+Na]<sup>+</sup> 330.1106, found 330.1107.

**10-phenyl-8,9-dihydro-5H-[1,3]dioxolo[4,5-g]isoxazolo[2,3-b]isoquinolin-5-one (2s).**

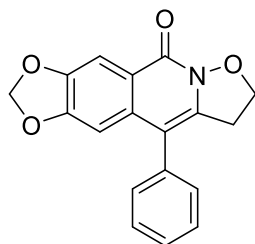

White solid, 36 mg, 58% yield, M.p. = 236-238 °C;

**<sup>1</sup>H NMR** (500 MHz, CDCl<sub>3</sub>):  $\delta$  7.83 (s, 1H), 7.48 (t,  $J$  = 7.3 Hz, 2H), 7.42 (t,  $J$  = 7.4 Hz, 1H), 7.32 –

7.29 (m, 2H), 6.66 (s, 1H), 6.01 (s, 2H), 4.54 (t,  $J = 7.6$  Hz, 2H), 3.33 (t,  $J = 7.6$  Hz, 2H);  $^{13}\text{C NMR}$  (125 MHz,  $\text{CDCl}_3$ ):  $\delta$  153.13, 151.56, 147.38, 135.18, 133.47, 131.19, 130.16, 128.91, 128.05, 121.83, 112.66, 105.11, 102.76, 101.82, 69.61, 32.39; **HRMS** (ESI)  $m/z$  calcd for  $\text{C}_{18}\text{H}_{13}\text{NNaO}_4^+$   $[\text{M}+\text{Na}]^+$  330.0742, found 330.0743.

**11-phenyl-9,10-dihydro-6H-[1,3]dioxolo[4,5-f]isoxazolo[2,3-b]isoquinolin-6-one (2s').**

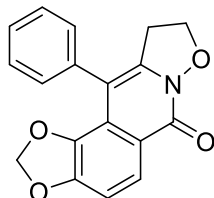

White solid, 25 mg, 41% yield, M.p. = 223-221 °C;

$^1\text{H NMR}$  (400 MHz,  $\text{CDCl}_3$ ):  $\delta$  8.17 (d,  $J = 8.5$  Hz, 1H), 7.45 – 7.37 (m, 3H), 7.35-7.28 (m, 2H), 7.04 (d,  $J = 8.5$  Hz, 1H), 5.82 (s, 2H), 4.52 (t,  $J = 7.5$  Hz, 2H), 3.30 (t,  $J = 7.5$  Hz, 2H);  $^{13}\text{C NMR}$  (100 MHz,  $\text{CDCl}_3$ ):  $\delta$  153.56, 150.18, 141.94, 136.06, 133.53, 129.99, 127.95, 127.71, 123.13, 121.60, 120.68, 108.94, 108.69, 101.62, 69.51, 32.55.; **HRMS** (ESI)  $m/z$  calcd for  $\text{C}_{18}\text{H}_{13}\text{NNaO}_4^+$   $[\text{M}+\text{Na}]^+$  330.0742, found 330.0742.

**7-phenyl-8,9-dihydro-12H-benzo[h]isoxazolo[2,3-b]isoquinolin-12-one (2t).**

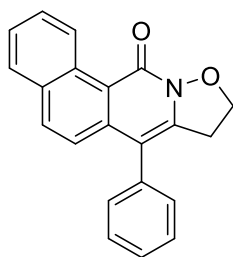

White solid, 60mg, 95% yield, M.p. = 232-234 °C;

$^1\text{H NMR}$  (500 MHz,  $\text{CDCl}_3$ ):  $\delta$  10.33 (d,  $J = 8.7$  Hz, 1H), 7.86 (d,  $J = 8.8$  Hz, 2H), 7.75 (t,  $J = 7.6$  Hz, 1H), 7.60 (t,  $J = 7.4$  Hz, 1H), 7.54 – 7.45 (m, 3H), 7.41 – 7.30 (m, 3H), 4.63 (t,  $J = 7.8$  Hz, 2H), 3.46 (t,  $J = 7.7$  Hz, 2H);  $^{13}\text{C NMR}$  (125 MHz,  $\text{CDCl}_3$ ):  $\delta$  154.74, 137.27, 135.58, 133.58, 132.83, 132.19, 131.76, 130.56, 129.00, 128.28, 128.13, 127.90, 127.57, 126.50, 122.64, 119.64, 112.87, 100.00, 69.36, 32.96; **HRMS** (ESI)  $m/z$  calcd for  $\text{C}_{21}\text{H}_{15}\text{NNaO}_2^+$   $[\text{M}+\text{Na}]^+$  336.1000, found 336.1002.

**4-(4-fluorophenyl)-2,3-dihydro-9H-isoxazolo[2,3-b]isoquinolin-9-one (2u).**

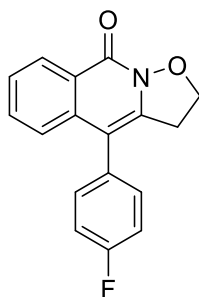

White solid, 55 mg, 97% yield, M.p. = 218-220 °C;

$^1\text{H NMR}$  ( $\text{CDCl}_3$ , 400 MHz):  $\delta$  8.53 (d,  $J = 8.0$  Hz, 1H), 7.59 – 7.53 (m, 1H), 7.49 (t,  $J = 7.5$  Hz, 1H),

7.37 – 7.28 (m, 3H), 7.21 (m, 2H), 4.58 (t,  $J = 7.6$  Hz, 2H), 3.38 (t,  $J = 7.6$  Hz, 2H);  $^{13}\text{C NMR}$  (  $\text{CDCl}_3$ , 100 MHz ):  $\delta$  162.51 (d,  $^1J_{\text{C,F}} = 247.9$  Hz), 153.93, 136.17, 132.77, 132.05 (d,  $^3J_{\text{C,F}} = 8.1$  Hz), 131.75, 130.88 (d,  $^4J_{\text{C,F}} = 3.5$  Hz), 127.54, 126.42, 126.27, 124.47, 116.04 (d,  $^2J_{\text{C,F}} = 21.5$  Hz), 111.94, 69.53, 32.44; **HRMS** (ESI)  $m/z$  calcd for  $\text{C}_{17}\text{H}_{12}\text{FNNaO}_2^+$   $[\text{M}+\text{Na}]^+$  304.0750, found 304.0753.

**4-(4-chlorophenyl)-2,3-dihydro-9H-isoxazolo[2,3-b]isoquinolin-9-one (2v).** <sup>[7]</sup>

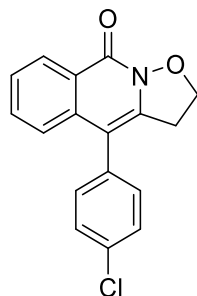

Pale yellow solid, 50 mg, 84% yield, M.p. = 233-235 °C;

$^1\text{H NMR}$  (  $\text{CDCl}_3$ , 500 MHz ):  $\delta$  8.51 (d,  $J = 8.0$  Hz, 1H), 7.58-7.52 (m, 1H), 7.50-7.44 (m, 3H), 7.35-7.26 (m, 3H), 4.58 (t,  $J = 7.6$  Hz, 2H), 3.38 (t,  $J = 7.6$  Hz, 2H);  $^{13}\text{C NMR}$  (  $\text{CDCl}_3$ , 125 MHz ):  $\delta$  153.87, 135.88, 134.18, 133.43, 132.75, 131.77, 131.69, 129.22, 127.52, 126.44, 126.24, 124.39, 111.72, 69.53, 32.43.

**4-(4-bromophenyl)-2,3-dihydro-9H-isoxazolo[2,3-b]isoquinolin-9-one (2w).** <sup>[7]</sup>

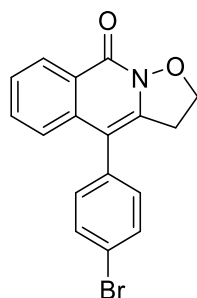

White solid, 57 mg, 83% yield, M.p. = 224-226 °C;

$^1\text{H NMR}$  (  $\text{CDCl}_3$ , 400MHz ):  $\delta$  8.63 – 8.43 (m, 1H), 7.71 – 7.60 (m, 2H), 7.59 – 7.44 (m, 2H), 7.35 – 7.28 (m, 1H), 7.26-7.23 (m, 2H), 4.67 – 4.46 (m, 2H), 3.38 (t,  $J = 7.5$  Hz, 2H);  $^{13}\text{C NMR}$  (  $\text{CDCl}_3$ , 100 MHz ):  $\delta$  153.89, 135.80, 133.93, 132.70, 132.21, 132.01, 131.81, 127.55, 126.47, 126.25, 124.39, 122.34, 111.75, 69.54, 32.45.

**4-(4-(trifluoromethyl)phenyl)-2,3-dihydro-9H-isoxazolo[2,3-b]isoquinolin-9-one (2x).**

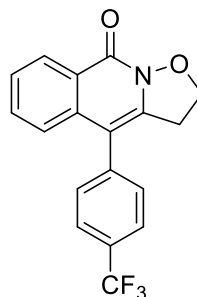

White solid, 53 mg, 80% yield, M.p. = 199-201 °C;

**<sup>1</sup>H NMR** (CDCl<sub>3</sub>, 500 MHz): δ 8.54 (d, *J* = 8.0 Hz, 1H), 7.78 (d, *J* = 7.9 Hz, 2H), 7.57 (t, *J* = 7.6 Hz, 1H), 7.51 (t, *J* = 7.2 Hz, 3H), 7.30 (d, *J* = 8.1 Hz, 1H), 4.59 (t, *J* = 7.5 Hz, 2H), 3.39 (t, *J* = 7.5 Hz, 2H); **<sup>13</sup>C NMR** (CDCl<sub>3</sub>, 125 MHz): δ 153.86, 138.87, 135.54, 132.88, 131.87, 130.77, 130.33 (q, <sup>1</sup>*J*<sub>C,F</sub> = 32.5 Hz), 127.62, 126.56, 126.26, 125.90, 124.20, 123.94 (q, <sup>1</sup>*J*<sub>C,F</sub> = 271.3 Hz), 111.49, 69.47, 32.42; **HRMS** (ESI) *m/z* calcd for C<sub>18</sub>H<sub>12</sub>F<sub>3</sub>NNaO<sub>2</sub><sup>+</sup> [M+Na]<sup>+</sup> 354.0718, found 354.0718.

**4-(p-tolyl)-2,3-dihydro-9H-isoxazolo[2,3-*b*]isoquinolin-9-one (2y).**<sup>[7]</sup>

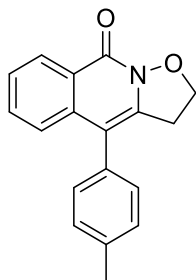

Pale yellow solid, 46 mg, 83% yield, M.p. = 195-197 °C;

**<sup>1</sup>H NMR** (500 MHz, CDCl<sub>3</sub>): δ 8.52 (d, *J* = 8.0 Hz, 1H), 7.55-7.51 (m, 1H), 7.46 (t, *J* = 7.2 Hz, 1H), 7.38 (d, *J* = 8.1 Hz, 1H), 7.30 (d, *J* = 7.9 Hz, 2H), 7.23 (d, *J* = 8.0 Hz, 2H), 4.56 (t, *J* = 7.6 Hz, 2H), 3.39 (t, *J* = 7.6 Hz, 2H), 2.44 (s, 3H); **<sup>13</sup>C NMR** (125 MHz, CDCl<sub>3</sub>): δ 153.91, 137.87, 136.34, 132.44, 131.93, 131.53, 130.13, 129.59, 127.40, 126.29, 126.20, 124.76, 112.99, 69.54, 32.44, 21.27;

**4-(4-methoxyphenyl)-2,3-dihydro-9H-isoxazolo[2,3-*b*]isoquinolin-9-one (2z).**<sup>[7]</sup>

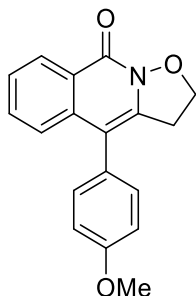

Pale yellow solid, 42 mg, 72% yield, M.p. = 238-240 °C;

**<sup>1</sup>H NMR** (CDCl<sub>3</sub>, 400 MHz): δ 8.54 (d, *J* = 8.0 Hz, 1H), 7.58 – 7.53 (m, 1H), 7.52 – 7.45 (m, 1H), 7.39 (d, *J* = 7.9 Hz, 1H), 7.29-7.24 (m, 3H), 7.06 – 6.99 (m, 2H), 4.57 (t, *J* = 7.6 Hz, 2H), 3.89 (s, 3H), 3.39 (t, *J* = 7.6 Hz, 2H); **<sup>13</sup>C NMR** (CDCl<sub>3</sub>, 125 MHz): δ 159.37, 153.96, 136.54, 132.53, 131.58, 131.42, 127.47, 127.08, 126.29, 124.75, 114.34, 112.72, 69.55, 55.38, 32.46.

**4-([1,1'-biphenyl]-4-yl)-2,3-dihydro-9H-isoxazolo[2,3-*b*]isoquinolin-9-one (2aa).**

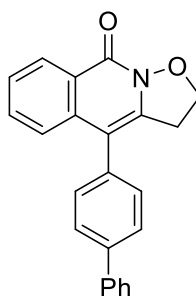

White solid, 57 mg, 84% yield, M.p. = 146-148 °C;

**<sup>1</sup>H NMR** (500 MHz, CDCl<sub>3</sub>): δ 8.54 (d, *J* = 8.1 Hz, 1H), 7.72 (d, *J* = 8.2 Hz, 2H), 7.67 (d, *J* = 8.5 Hz, 2H), 7.60 – 7.53 (m, 1H), 7.51 – 7.46 (m, 4H), 7.44-7.37 (m, 3H), 4.58 (t, *J* = 7.6 Hz, 2H), 3.44 (t, *J* = 7.6 Hz, 2H); **<sup>13</sup>C NMR** (125 MHz, CDCl<sub>3</sub>): δ 153.95, 140.91, 140.38, 136.16, 133.92, 132.65, 131.69, 130.75, 128.95, 127.68, 127.58, 127.48, 127.08, 126.35, 126.31, 124.75, 112.68, 69.63, 32.55; **HRMS** (ESI) *m/z* calcd for C<sub>23</sub>H<sub>17</sub>NNaO<sub>2</sub><sup>+</sup> [M+Na]<sup>+</sup> 362.1157, found 362.1156.

**4-(*m*-tolyl)-2,3-dihydro-9*H*-isoxazolo[2,3-*b*]isoquinolin-9-one (2ab).**

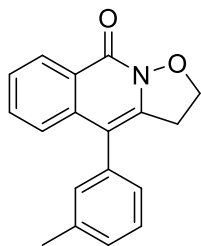

Pale yellow solid, 39 mg, 70% yield, M.p. = 189-191 °C;

**<sup>1</sup>H NMR** (CDCl<sub>3</sub>, 400 MHz): δ 8.53 (d, *J* = 8.1 Hz, 1H), 7.59 – 7.51 (m, 1H), 7.52 – 7.43 (m, 1H), 7.39 (t, *J* = 7.7 Hz, 2H), 7.27 (s, 1H), 7.14 (d, *J* = 11.7 Hz, 2H), 4.57 (t, *J* = 7.6 Hz, 2H), 3.39 (t, *J* = 7.6 Hz, 2H), 2.43 (s, 3H); **<sup>13</sup>C NMR** (CDCl<sub>3</sub>, 100 MHz): δ 153.95, 138.63, 136.27, 134.91, 132.40, 131.59, 130.90, 128.84, 128.80, 127.42, 127.33, 126.26, 124.81, 113.20, 69.58, 32.46, 21.47; **HRMS** (ESI) *m/z* calcd for C<sub>18</sub>H<sub>15</sub>NNaO<sub>2</sub><sup>+</sup> [M+Na]<sup>+</sup> 300.1000, found 300.1003.

**4-(*o*-tolyl)-2,3-dihydro-9*H*-isoxazolo[2,3-*b*]isoquinolin-9-one (2ac).<sup>[7]</sup>**

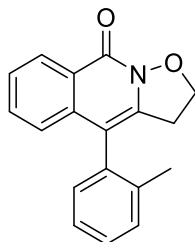

Pale yellow solid, 52 mg, 93% yield, M.p. = 140-142 °C;

**<sup>1</sup>H NMR** (500 MHz, CDCl<sub>3</sub>): δ 8.52 (dd, *J* = 8.0, 1.4 Hz, 1H), 7.54 – 7.42 (m, 2H), 7.39-7.34 (m, 2H), 7.31-7.28 (m, 1H), 7.19 (d, *J* = 7.3 Hz, 1H), 7.05 (d, *J* = 7.8 Hz, 1H), 4.57 (t, *J* = 7.7 Hz, 2H), 3.37 – 3.12 (m, 2H), 2.06 (s, 3H); **<sup>13</sup>C NMR** (125 MHz, CDCl<sub>3</sub>): δ 154.00, 137.59, 136.08, 134.05, 132.35, 131.69, 130.58, 130.46, 128.60, 127.40, 126.41, 126.24, 126.16, 124.50, 112.21, 69.45, 32.12, 19.63.

**4-(3,5-dimethylphenyl)-2,3-dihydro-9*H*-isoxazolo[2,3-*b*]isoquinolin-9-one (2ad).<sup>[7]</sup>**

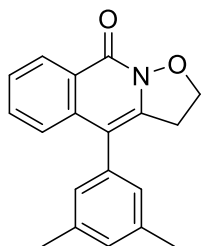

Pale yellow solid, 43 mg, 74% yield, M.p. =249-251 °C;

**<sup>1</sup>H NMR** (500 MHz, CDCl<sub>3</sub>): δ 8.53 (d, *J* = 7.9 Hz, 1H), 7.54 (t, *J* = 7.1 Hz, 1H), 7.47 (t, *J* = 7.3 Hz, 1H), 7.38 (d, *J* = 8.1 Hz, 1H), 7.08 (s, 1H), 6.95 (s, 2H), 4.57 (t, *J* = 7.6 Hz, 2H), 3.40 (t, *J* = 7.6 Hz, 2H), 2.38 (s, 6H); **<sup>13</sup>C NMR** (125 MHz, CDCl<sub>3</sub>): δ 153.94, 138.47, 136.35, 134.82, 132.28, 131.54, 129.69, 127.97, 127.37, 126.24, 126.20, 124.89, 113.34, 69.58, 32.46, 21.35.

**4-(3,5-bis(trifluoromethyl)phenyl)-2,3-dihydro-9H-isoxazolo[2,3-*b*]isoquinolin-9-one (2ae).**

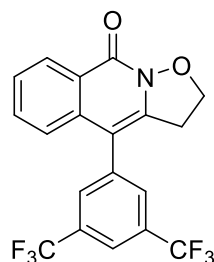

White solid, 41 mg, 51% yield, M.p. = 238-240 °C;

**<sup>1</sup>H NMR** (500 MHz, CDCl<sub>3</sub>): δ 8.54 (d, *J* = 8.8 Hz, 1H), 7.99 (s, 1H), 7.87 (s, 2H), 7.62-7.58 (m, 1H), 7.52 (t, *J* = 7.5 Hz, 1H), 7.19 (d, *J* = 8.1 Hz, 1H), 4.62 (t, *J* = 7.6 Hz, 2H), 3.41 (t, *J* = 7.6 Hz, 2H); **<sup>13</sup>C NMR** (125 MHz, CDCl<sub>3</sub>): δ 153.82, 137.43, 135.09, 133.63, 132.53 (q, <sup>2</sup>*J*<sub>C,F</sub> = 32.5 Hz), 132.27, 130.58, 127.87, 126.88, 126.25, 123.58, 123.02 (d, <sup>1</sup>*J*<sub>C,F</sub> = 272.3 Hz), 109.95, 109.78, 69.41, 32.44; **HRMS** (ESI) *m/z* calcd for C<sub>19</sub>H<sub>11</sub>F<sub>6</sub>NNaO<sub>2</sub><sup>+</sup> [M+Na]<sup>+</sup> 422.0592, found 422.0588.

**4-(naphthalen-1-yl)-2,3-dihydro-9H-isoxazolo[2,3-*b*]isoquinolin-9-one (2af).<sup>[7]</sup>**

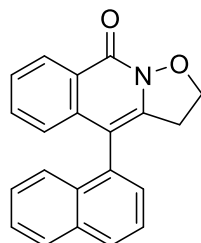

Pale yellow solid; 47 mg, 75% yield, M.p. = 222-224 °C;

**<sup>1</sup>H NMR** (500 MHz, CDCl<sub>3</sub>): δ 8.58 (dd, *J* = 7.9, 1.3 Hz, 1H), 7.97 (t, *J* = 7.8 Hz, 2H), 7.62-7.58 (m, 1H), 7.56 – 7.34 (m, 6H), 7.07 – 6.95 (m, 1H), 4.62-4.50 (m, 2H), 3.34-3.26 (m, 1H), 3.14-3.06 (m, 1H); **<sup>13</sup>C NMR** (125 MHz, CDCl<sub>3</sub>): δ 154.17, 136.86, 133.96, 133.50, 132.41, 132.28, 131.74, 129.00, 128.70, 128.66, 127.41, 126.80, 126.37, 126.32, 126.19, 125.73, 125.26, 125.10, 110.85, 69.55, 32.26..

**(*E*)-4-styryl-2,3-dihydro-9H-isoxazolo[2,3-*b*]isoquinolin-9-one (2ag).**

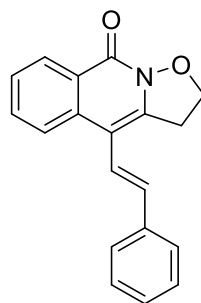

White solid, 45 mg, 78% yield, M.p. = 206-208°C;

**<sup>1</sup>H NMR** (500 MHz CDCl<sub>3</sub>): δ 8.52 (d, *J* = 7.3 Hz, 1H), 7.82 (d, *J* = 8.2 Hz, 1H), 7.69 – 7.64 (m, 1H), 7.54-7.47 (m, 3H), 7.41 (t, *J* = 7.6 Hz, 2H), 7.33 (t, *J* = 7.4 Hz, 1H), 7.22 (d, *J* = 16.3 Hz, 1H), 6.76 (d, *J* = 16.3 Hz, 1H), 4.60 (t, *J* = 7.5 Hz, 2H), 3.69 (t, *J* = 7.5 Hz, 2H); **<sup>13</sup>C NMR** (125 MHz, CDCl<sub>3</sub>): δ 153.89, 136.81, 135.39, 134.10, 132.37, 131.83, 128.88, 128.21, 127.71, 126.56, 126.39, 126.20, 123.52, 121.45, 109.31, 69.97, 32.20; **HRMS** (ESI) *m/z* calcd for C<sub>19</sub>H<sub>15</sub>NNaO<sub>2</sub><sup>+</sup> [M+Na]<sup>+</sup> 312.1000, found 312.1004.

**(E)-4-(4-methylstyryl)-2,3-dihydro-9H-isoxazolo[2,3-*b*]isoquinolin-9-one (2ah).**

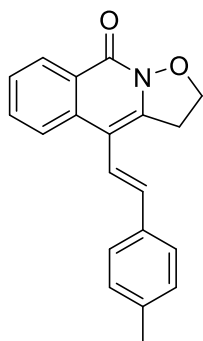

White solid, 42 mg, 69% yield, M.p. = 210-212°C;

**<sup>1</sup>H NMR** (500 MHz CDCl<sub>3</sub>): δ 8.51 (d, *J* = 8.1 Hz, 2H), 7.82 (d, *J* = 8.2 Hz, 1H), 7.66 (t, *J* = 7.6 Hz, 1H), 7.51 (t, *J* = 7.6 Hz, 1H), 7.42 (d, *J* = 7.7 Hz, 2H), 7.21 (d, *J* = 7.8 Hz, 2H), 7.17 (d, *J* = 16.2 Hz, 1H), 6.73 (d, *J* = 16.2 Hz, 1H), 4.59 (t, *J* = 7.4 Hz, 2H), 3.68 (t, *J* = 7.5 Hz, 2H), 2.39 (s, 3H); **<sup>13</sup>C NMR** (125 MHz, CDCl<sub>3</sub>): δ 153.87, 138.23, 135.45, 134.07, 132.19, 131.78, 129.56, 127.68, 126.51, 126.30, 126.20, 123.55, 120.39, 109.51, 69.45, 33.02, 21.28; **HRMS** (ESI) *m/z* calcd for C<sub>20</sub>H<sub>17</sub>NNaO<sub>2</sub><sup>+</sup> [M+Na]<sup>+</sup> 326.1157, found 326.1164.

**(E)-4-(4-chlorostyryl)-2,3-dihydro-9H-isoxazolo[2,3-*b*]isoquinolin-9-one (2ai).**

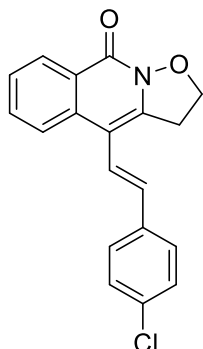

White solid, 38 mg, 59% yield, M.p. = 202-204°C;

**<sup>1</sup>H NMR** (500 MHz CDCl<sub>3</sub>): δ 8.49 (d, *J* = 8.0 Hz, 1H), 7.78 (d, *J* = 8.2 Hz, 1H), 7.65 (t, *J* = 7.6 Hz, 1H), 7.50 (t, *J* = 7.5 Hz, 1H), 7.44 (d, *J* = 8.1 Hz, 2H), 7.36 (d, *J* = 8.2 Hz, 2H), 7.18 (d, *J* = 16.2 Hz, 1H), 6.70 (d, *J* = 16.2 Hz, 1H), 4.59 (t, *J* = 7.3 Hz, 2H), 3.67 (t, *J* = 7.5 Hz, 2H); **<sup>13</sup>C NMR** (125 MHz, CDCl<sub>3</sub>): δ 153.79, 135.27, 135.18, 133.78, 132.62, 132.49, 131.82, 128.97, 127.67, 127.49, 126.55, 126.13, 123.36, 122.02, 108.92, 69.37, 33.02; **HRMS** (ESI) *m/z* calcd for C<sub>19</sub>H<sub>14</sub>ClNNaO<sub>2</sub><sup>+</sup> [M+Na]<sup>+</sup> 346.0611, found 346.0612.



**(E)-4-(2-methylstyryl)-2,3-dihydro-9H-isoxazolo[2,3-b]isoquinolin-9-one (2aj).**

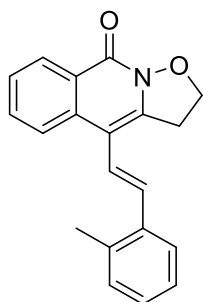

White solid, 38 mg, 62% yield, M.p. = 222-224°C;

**<sup>1</sup>H NMR** (500 MHz CDCl<sub>3</sub>): δ 8.51 (d, *J* = 8.0 Hz, 1H), 7.82 (d, *J* = 8.2 Hz, 1H), 7.69 – 7.61 (m, 2H), 7.50 (t, *J* = 7.5 Hz, 1H), 7.30-7.20 (m, 3H), 7.09 (d, *J* = 16.1 Hz, 1H), 6.99 (d, *J* = 16.1 Hz, 1H), 4.60 (t, *J* = 7.4 Hz, 2H), 3.69 (t, *J* = 7.5 Hz, 2H), 2.41 (s, 3H); **<sup>13</sup>C NMR** (125 MHz, CDCl<sub>3</sub>): δ 153.86, 136.05, 135.64, 135.41, 132.34, 132.18, 131.81, 130.57, 127.67, 126.52, 126.41, 126.19, 125.44, 123.50, 122.75; **HRMS** (ESI) *m/z* calcd for C<sub>20</sub>H<sub>17</sub>NNaO<sub>2</sub><sup>+</sup> [M+Na]<sup>+</sup> 326.1157, found 326.1163.

**(E)-4-(3-methylstyryl)-2,3-dihydro-9H-isoxazolo[2,3-b]isoquinolin-9-one (2ak).**

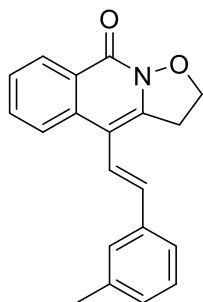

White solid, 39 mg, 65% yield, M.p. = 228-230°C;

**<sup>1</sup>H NMR** (500 MHz CDCl<sub>3</sub>): δ 8.50 (d, *J* = 8.1 Hz, 1H), 7.80 (d, *J* = 8.2 Hz, 1H), 7.68 – 7.61 (m, 1H), 7.53 – 7.46 (m, 1H), 7.36 – 7.27 (m, 3H), 7.22 – 7.12 (m, 2H), 6.72 (d, *J* = 16.3 Hz, 1H), 4.58 (t, *J* = 7.5 Hz, 2H), 3.66 (t, *J* = 7.5 Hz, 2H), 2.40 (s, 3H); **<sup>13</sup>C NMR** (125 MHz, CDCl<sub>3</sub>): δ 153.86, 136.05, 135.64, 135.41, 132.34, 132.18, 131.82, 130.57, 128.12, 127.67, 126.52, 126.41, 126.19, 125.44, 123.50, 122.75, 109.65, 69.43, 33.08, 19.99; **HRMS** (ESI) *m/z* calcd for C<sub>20</sub>H<sub>17</sub>NNaO<sub>2</sub><sup>+</sup> [M+Na]<sup>+</sup> 326.1157, found 326.1160.

**(Z)-4-(2-fluoro-2-phenylvinyl)-2,3-dihydro-9H-isoxazolo[2,3-b]isoquinolin-9-one (2al).**

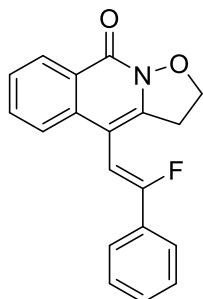

White solid, 36 mg, 58% yield, M.p. = 200-202°C;

**<sup>1</sup>H NMR** (500 MHz CDCl<sub>3</sub>): δ 8.51 (d, *J* = 8.1 Hz, 1H), 7.76 – 7.60 (m, 4H), 7.55 – 7.39 (m, 4H), 6.48

(d,  $J = 37.1$  Hz, 1H), 4.61 (t,  $J = 7.6$  Hz, 2H), 3.55 (t,  $J = 7.6$  Hz, 2H);  $^{13}\text{C NMR}$  (125 MHz,  $\text{CDCl}_3$ ):  $\delta$  157.88 (d,  $^1J_{\text{C,F}} = 255.5$  Hz), 153.99, 135.47, 134.02, 131.75, 131.51, 129.73, 128.76, 127.62, 126.43, 125.99, 124.54 (d,  $^3J_{\text{C,F}} = 7.2$  Hz), 123.57, 103.50, 98.27 (d,  $^2J_{\text{C,F}} = 15.6$  Hz), 69.57, 33.10; **HRMS** (ESI)  $m/z$  calcd for  $\text{C}_{19}\text{H}_{14}\text{FNNaO}_2$   $[\text{M}+\text{Na}]^+$  330.0906, found 330.0914.

**4-(phenylethynyl)-2,3-dihydro-9H-isoxazolo[2,3-b]isoquinolin-9-one (2am).**

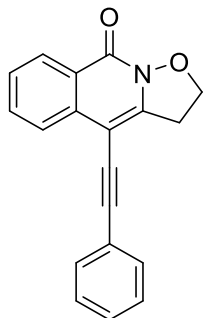

White solid, 41 mg, 72% yield, M.p. = 158-160°C;

$^1\text{H NMR}$  (500 MHz  $\text{CDCl}_3$ ):  $\delta$  8.48 (d,  $J = 9.6$  Hz, 1H), 8.03 (d,  $J = 8.1$  Hz, 1H), 7.73 (t,  $J = 7.6$  Hz, 1H), 7.63 – 7.57 (m, 2H), 7.54 (t,  $J = 7.6$  Hz, 1H), 7.47 – 7.37 (m, 3H), 4.68 (t,  $J = 7.8$  Hz, 2H), 3.78 (t,  $J = 7.8$  Hz, 2H);  $^{13}\text{C NMR}$  (125 MHz,  $\text{CDCl}_3$ ):  $\delta$  153.78, 138.68, 135.38, 132.24, 131.42, 128.63, 128.54, 127.42, 126.90, 125.55, 124.76, 122.84, 96.07, 95.19, 82.13, 69.46, 33.21; **HRMS** (ESI)  $m/z$  calcd for  $\text{C}_{19}\text{H}_{13}\text{NNaO}_2^+$   $[\text{M}+\text{Na}]^+$  310.0844, found 310.0850.

**5-phenyl-3,4-dihydro-[1,2]oxazino[2,3-b]isoquinolin-10(2H)-one (2an).<sup>[7]</sup>**

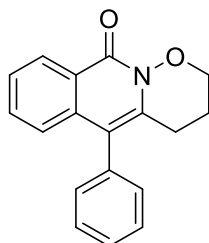

White solid, 47 mg, 85% yield, M.p. = 190-192°C;

$^1\text{H NMR}$  (500 MHz  $\text{CDCl}_3$ ):  $\delta$  8.52 (d,  $J = 9.5$  Hz, 1H), 7.54-7.45 (m, 3H), 7.46 – 7.40 (m, 2H), 7.27 (t,  $J = 6.4$  Hz, 2H), 7.16 (d,  $J = 8.1$  Hz, 1H), 4.43 (t,  $J = 6.9$  Hz, 2H), 2.70 (t,  $J = 6.9$  Hz, 2H), 2.10-2.02 (m, 2H);  $^{13}\text{C NMR}$  (125 MHz,  $\text{CDCl}_3$ ):  $\delta$  138.38, 136.11, 135.05, 131.06, 128.80, 127.90, 127.75, 125.91, 125.51, 125.00, 70.82, 21.77, 21.36.

**7-methyl-5-phenyl-3,4-dihydro-[1,2]oxazino[2,3-b]isoquinolin-10(2H)-one (2ao).<sup>[7]</sup>**

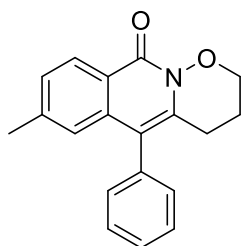

White solid, 51mg, 87% yield, M.p. = 198-200°C;

**<sup>1</sup>H NMR** (500 MHz CDCl<sub>3</sub>): δ 8.41 (d, *J* = 8.2 Hz, 1H), 7.50 (t, *J* = 7.2 Hz, 2H), 7.45 (t, *J* = 7.3 Hz, 1H), 7.27 (t, *J* = 7.3 Hz, 3H), 6.91 (s, 1H), 4.46 – 4.37 (m, 2H), 2.67 (t, *J* = 6.9 Hz, 2H), 2.33 (s, 3H), 2.08–2.01 (m, 2H); **<sup>13</sup>C NMR** (125 MHz, CDCl<sub>3</sub>): δ 156.53, 138.38, 136.11, 135.05, 131.87, 131.06, 128.80, 127.90, 127.75, 125.91, 125.51, 125.00, 115.22, 70.82, 21.77, 21.36.

**7-chloro-5-phenyl-3,4-dihydro-[1,2]oxazino[2,3-*b*]isoquinolin-10(2*H*)-one (2ap).**<sup>[7]</sup>

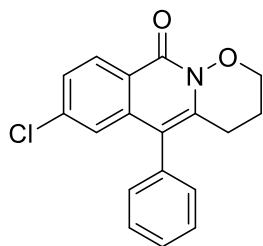

Pale yellow solid; 51 mg, 82% yield, M.p. = 168–170°C;

**<sup>1</sup>H NMR** (500 MHz CDCl<sub>3</sub>): δ 8.45 (d, *J* = 8.6 Hz, 1H), 7.56 – 7.44 (m, 3H), 7.38 (dd, *J* = 8.7, 2.0 Hz, 1H), 7.29–7.24 (m, 2H), 7.12 (d, *J* = 2.1 Hz, 1H), 4.44 (t, *J* = 6.9 Hz, 2H), 2.70 (t, *J* = 6.9 Hz, 2H), 2.11–2.04 (m, 2H); **<sup>13</sup>C NMR** (125 MHz, CDCl<sub>3</sub>): δ 157.78, 139.90, 138.63, 137.42, 134.32, 130.94, 129.57, 129.03, 128.22, 126.48, 124.32, 123.81, 114.52, 70.85, 21.62, 21.49.

**6-(methylthio)-4-phenyl-2,3-dihydro-9*H*-isoxazolo[2,3-*b*]isoquinolin-9-one (2aq).**

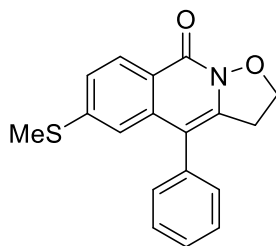

White solid, 54 mg, 87% yield, M.p. = 199–201°C;

**<sup>1</sup>H NMR** (500 MHz CDCl<sub>3</sub>): δ 8.41 (d, *J* = 8.1 Hz, 1H), 7.53–7.49 (m, 2H), 7.47–7.43 (m, 1H), 7.36–7.29 (m, 3H), 7.11 (s, 1H), 4.56 (t, *J* = 7.8 Hz, 2H), 3.37 (t, *J* = 7.6 Hz, 2H), 2.39 (s, 3H); **<sup>13</sup>C NMR** (125 MHz, CDCl<sub>3</sub>): δ 153.79, 144.08, 136.57, 134.76, 133.38, 130.26, 128.98, 128.20, 127.71, 123.93, 123.12, 120.13, 112.26, 69.53, 32.54, 14.85. **HRMS** (ESI) *m/z* calcd for C<sub>18</sub>H<sub>15</sub>NNaO<sub>2</sub>S<sup>+</sup> [M+Na]<sup>+</sup> 332.0721, found 332.0721.

## References

- [1] Xu, X.; Liu, Y.; Park, C.-M. *Angew. Chem., Int. Ed.* **2012**, *51*, 9372–9376.
- [2] Palmer, N.; Peakman, T. M.; Norton, D.; Rees, D. C. *Org. Biomol. Chem.*, **2016**, *14*, 1599–1610.
- [3] Xie, L.-G.; Shaaban, S.; Chen, X.; Maulide, N. *Angew. Chem.* **2016**, *128*, 13056–13059.
- [4] Williams, D. R.; Fultz, M. W.; Christos, T. E.; Carter, J. S. *Tetrahedron Letters.* **2010**, *51*, 121–124.
- [5] Huang, L.; Rueping, M. *Angew. Chem. Int. Ed.* **2018**, *57*, 10333–10337.
- [6] Li, Y.; Liu, X.; Ma, D.; Liu, B.; Jiang, H. *Adv. Synth. Catal.* **2012**, *354*, 2683 – 2688.
- [7] Chen, F.; Lai, S.-Q.; Zhu, F.-F.; Meng, Q.; Jiang, Y.; Yu, W.; Han, B. *ACS Catal.* **2018**, *8*, 8925–8931

## Computational Details

The B3LYP functional was used for all calculations, which were carried out with the Gaussian 09

program<sup>1</sup>. Basis set 6-31G(d) was used for geometry optimizations and frequency calculations.<sup>2,3,4</sup> Geometric structures of all species in this work were optimized in solvation with the SMD solvent model at  $T = 298.15$  K and 1 atm pressure. The harmonic vibrational frequencies and the number of imaginary frequencies determine the nature of all intermediates (no imaginary frequency) and transition state structures (only one imaginary frequency). The latter were also confirmed to connect appropriate intermediates, reactants, or products by intrinsic reaction coordinate (IRC) calculations.<sup>5,6</sup> The energy were refined with bigger basis set 6-311++G(d,p). The same methodology has been widely used in previous works.<sup>7</sup>

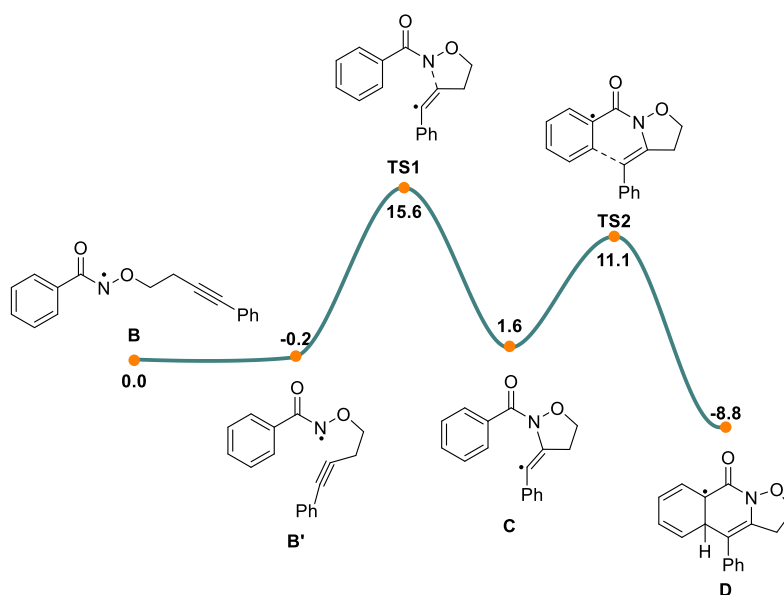

**Figure S1.** Computed free energy profile (in kcal mol<sup>-1</sup>) of this react

## Cartesian Coordinates of all the intermediate and transition states

### B

|   |             |             |             |
|---|-------------|-------------|-------------|
| C | -4.37912500 | -0.54076300 | -0.99468800 |
| C | -3.12036900 | -0.65746700 | -0.40638800 |
| C | -2.61982700 | 0.38445600  | 0.39525400  |
| C | -3.39734200 | 1.53812700  | 0.59519400  |
| C | -4.65342300 | 1.64913500  | 0.00641400  |
| C | -5.14682100 | 0.60914700  | -0.78995300 |
| H | -4.76092000 | -1.34795800 | -1.61363500 |
| H | -2.52731500 | -1.55045600 | -0.56767100 |
| H | -3.00389700 | 2.33782500  | 1.21469000  |
| H | -5.24931800 | 2.54349900  | 0.16614800  |
| H | -6.12757800 | 0.69606300  | -1.25006900 |
| C | -1.28646700 | 0.32052000  | 1.04722100  |
| O | -0.82161200 | 1.23296400  | 1.73168900  |
| N | -0.60697100 | -0.89380900 | 0.80449500  |
| O | 0.57751400  | -0.85228600 | 1.42284100  |
| C | 1.32078800  | -2.08346600 | 1.21902900  |
| C | 2.68481500  | -1.87285800 | 1.87725800  |
| H | 1.40693900  | -2.26040500 | 0.14401900  |
| H | 0.76289500  | -2.90021000 | 1.68459900  |
| H | 3.17646500  | -1.00697600 | 1.41532500  |
| H | 2.53958200  | -1.63429200 | 2.93874800  |
| C | 3.52284500  | -3.06290800 | 1.73815800  |
| C | 4.20464400  | -4.05918900 | 1.61328400  |
| C | 5.01117900  | -5.23276700 | 1.46853100  |
| C | 5.09491400  | -6.17640100 | 2.51235000  |
| C | 5.73134800  | -5.46277800 | 0.27881200  |
| C | 5.87813100  | -7.31990200 | 2.36465700  |
| H | 4.54242300  | -6.00477400 | 3.43159800  |
| C | 6.51228700  | -6.60894000 | 0.14058100  |
| H | 5.67170000  | -4.73868700 | -0.52859900 |
| C | 6.58804700  | -7.54040300 | 1.18051000  |
| H | 5.93368300  | -8.04109300 | 3.17583800  |
| H | 7.06287600  | -6.77556000 | -0.78153600 |
| H | 7.19706900  | -8.43342900 | 1.06843100  |

### B'

|   |             |            |             |
|---|-------------|------------|-------------|
| C | -4.15906700 | 0.65813900 | -1.31089200 |
| C | -3.00924600 | 0.21495600 | -0.65856200 |

|   |             |             |             |
|---|-------------|-------------|-------------|
| C | -2.96912100 | 0.17405000  | 0.74689700  |
| C | -4.09522500 | 0.58174100  | 1.48242300  |
| C | -5.24030200 | 1.02425200  | 0.82642300  |
| C | -5.27421700 | 1.06351800  | -0.57225100 |
| H | -4.18458200 | 0.68661000  | -2.39674700 |
| H | -2.14672900 | -0.10023500 | -1.23446900 |
| H | -4.05793400 | 0.54677900  | 2.56659400  |
| H | -6.10698300 | 1.33811700  | 1.40172100  |
| H | -6.16854000 | 1.40890600  | -1.08416900 |
| C | -1.77308800 | -0.29107900 | 1.49761500  |
| O | -1.72468600 | -0.34921700 | 2.72799800  |
| N | -0.70067300 | -0.65207500 | 0.65631400  |
| O | 0.32556200  | -1.06289300 | 1.41413200  |
| C | 1.43496300  | -1.52828100 | 0.60976800  |
| C | 1.35958500  | -3.04801000 | 0.40915700  |
| H | 2.32316900  | -1.27585300 | 1.19267800  |
| H | 1.43385600  | -0.98545100 | -0.33710500 |
| H | 2.30520500  | -3.34889200 | -0.06254400 |
| H | 1.33063300  | -3.53371800 | 1.39289000  |
| C | 0.23013000  | -3.49100300 | -0.40590700 |
| C | -0.70635700 | -3.86531900 | -1.08257500 |
| C | -1.80747900 | -4.31089400 | -1.88007000 |
| C | -2.91684800 | -4.94009500 | -1.27917500 |
| C | -1.79904300 | -4.12792100 | -3.27796300 |
| C | -3.98659000 | -5.37424000 | -2.05993900 |
| H | -2.92943300 | -5.08381000 | -0.20270100 |
| C | -2.87392300 | -4.56468200 | -4.05023500 |
| H | -0.94762600 | -3.64334800 | -3.74695000 |
| C | -3.96947800 | -5.18851400 | -3.44567500 |
| H | -4.83596700 | -5.85834400 | -1.58526500 |
| H | -2.85638800 | -4.41731800 | -5.12688300 |
| H | -4.80570300 | -5.52776100 | -4.05123400 |

## TS1

|   |             |             |             |
|---|-------------|-------------|-------------|
| C | -3.65675500 | 0.19634000  | -1.76181200 |
| C | -2.53911900 | -0.02993700 | -0.95764900 |
| C | -2.70107100 | -0.35575700 | 0.39902100  |
| C | -3.99558500 | -0.44501200 | 0.93641700  |
| C | -5.10934800 | -0.22494100 | 0.12930500  |
| C | -4.94191600 | 0.09724300  | -1.22177900 |
| H | -3.52360800 | 0.45606400  | -2.80853600 |
| H | -1.54154600 | 0.06280200  | -1.37291100 |

|   |             |             |             |
|---|-------------|-------------|-------------|
| H | -4.11515100 | -0.69046500 | 1.98723100  |
| H | -6.10762700 | -0.30238700 | 0.55158300  |
| H | -5.81097100 | 0.27506500  | -1.84980500 |
| C | -1.54322700 | -0.57453200 | 1.31190200  |
| O | -1.64780400 | -0.49225400 | 2.54035900  |
| N | -0.33346300 | -0.79891500 | 0.64896600  |
| O | 0.69067600  | -0.89955400 | 1.58966600  |
| C | 1.78284100  | -1.48553500 | 0.88439100  |
| C | 1.25559500  | -2.82799600 | 0.35768400  |
| H | 2.59441400  | -1.60116700 | 1.60454900  |
| H | 2.09590400  | -0.83177700 | 0.06233100  |
| H | 1.90222200  | -3.21573100 | -0.43679500 |
| H | 1.23647100  | -3.56212300 | 1.17176600  |
| C | -0.12439800 | -2.62893900 | -0.15260100 |
| C | -1.07775900 | -3.11724200 | -0.79546300 |
| C | -2.19014700 | -3.59301800 | -1.50761000 |
| C | -3.18448200 | -4.37086300 | -0.85792900 |
| C | -2.32571500 | -3.32810500 | -2.89612800 |
| C | -4.27012000 | -4.85775100 | -1.57547100 |
| H | -3.08553800 | -4.57761900 | 0.20333000  |
| C | -3.41505100 | -3.82633800 | -3.59960000 |
| H | -1.56735400 | -2.73545100 | -3.39854300 |
| C | -4.39034600 | -4.59051800 | -2.94543000 |
| H | -5.02750400 | -5.44967800 | -1.06900600 |
| H | -3.50907300 | -3.61947100 | -4.66211600 |
| H | -5.24056500 | -4.97632800 | -3.50101600 |

## C

|   |             |             |             |
|---|-------------|-------------|-------------|
| C | -3.74142700 | 0.39170900  | -1.67105400 |
| C | -2.58200000 | 0.14612900  | -0.93488900 |
| C | -2.66656100 | -0.09770300 | 0.44461600  |
| C | -3.91674400 | -0.07829100 | 1.07976300  |
| C | -5.07472000 | 0.14672900  | 0.33604200  |
| C | -4.98842100 | 0.38339100  | -1.03921800 |
| H | -3.67091100 | 0.59401600  | -2.73630200 |
| H | -1.61287100 | 0.16575100  | -1.42392100 |
| H | -3.97457800 | -0.24533700 | 2.15130400  |
| H | -6.04241300 | 0.14526400  | 0.83018700  |
| H | -5.89069000 | 0.56863200  | -1.61609300 |
| C | -1.44715800 | -0.25284100 | 1.29435900  |
| O | -1.31270600 | 0.35473200  | 2.35893800  |
| N | -0.44712400 | -1.06024800 | 0.80195000  |

|   |             |             |             |
|---|-------------|-------------|-------------|
| O | 0.71357300  | -1.08745900 | 1.62231500  |
| C | 1.67900700  | -1.80559200 | 0.82866200  |
| C | 0.86759900  | -2.93118200 | 0.19376800  |
| H | 2.45138200  | -2.13923500 | 1.52356000  |
| H | 2.11063200  | -1.13627100 | 0.07421200  |
| H | 1.27752700  | -3.27259700 | -0.75931800 |
| H | 0.78426500  | -3.78823300 | 0.87056000  |
| C | -0.50250500 | -2.27512300 | 0.02458400  |
| C | -1.52294400 | -2.71937800 | -0.65956400 |
| C | -2.27948900 | -3.53393800 | -1.49278900 |
| C | -3.08957100 | -4.58336500 | -0.95739300 |
| C | -2.31316100 | -3.31866100 | -2.90578400 |
| C | -3.86538100 | -5.37362500 | -1.79305000 |
| H | -3.08353600 | -4.75516800 | 0.11502300  |
| C | -3.09606400 | -4.12060700 | -3.72381000 |
| H | -1.71073300 | -2.52067100 | -3.32971600 |
| C | -3.87609800 | -5.15154600 | -3.17847400 |
| H | -4.46923000 | -6.17117800 | -1.36760800 |
| H | -3.10297800 | -3.94594200 | -4.79674400 |
| H | -4.48770800 | -5.77372300 | -3.82589800 |

## TS2

|   |             |             |             |
|---|-------------|-------------|-------------|
| C | -4.40141800 | -0.99802100 | -0.45742100 |
| C | -3.27300500 | -1.02424700 | 0.40809800  |
| C | -2.46107600 | 0.14926500  | 0.49006400  |
| C | -2.73335400 | 1.25612600  | -0.31669900 |
| C | -3.81438900 | 1.23602000  | -1.20024300 |
| C | -4.64390000 | 0.10155500  | -1.26687500 |
| H | -5.07211300 | -1.85212100 | -0.47860700 |
| H | -3.29659800 | -1.70615700 | 1.25403400  |
| H | -2.08525100 | 2.12552000  | -0.25770600 |
| H | -4.01782500 | 2.09841100  | -1.82835600 |
| H | -5.49843000 | 0.09996500  | -1.93880500 |
| C | -1.24369700 | 0.15881200  | 1.32839500  |
| O | -0.74501400 | 1.16472700  | 1.83592200  |
| N | -0.69692600 | -1.10865800 | 1.50121400  |
| O | 0.52383100  | -1.14589000 | 2.21116600  |
| C | 1.47627500  | -1.73659800 | 1.29380100  |
| C | 0.66355700  | -2.80686100 | 0.56923600  |
| H | 2.29154800  | -2.12197200 | 1.90826100  |
| H | 1.84955800  | -0.96791500 | 0.60592400  |
| H | 1.04285500  | -3.03210600 | -0.43015100 |



|   |             |             |             |
|---|-------------|-------------|-------------|
| H | 0.63204100  | -3.73542700 | 1.15067200  |
| C | -0.71339200 | -2.16413000 | 0.52338200  |
| C | -1.75174500 | -2.43245000 | -0.24887100 |
| C | -2.10406500 | -3.39140600 | -1.25345300 |
| C | -2.32365000 | -4.74857700 | -0.91365000 |
| C | -2.30269400 | -2.99529500 | -2.59795300 |
| C | -2.69677000 | -5.67237800 | -1.88691800 |
| H | -2.19311200 | -5.06393700 | 0.11787600  |
| C | -2.67881800 | -3.92560800 | -3.56308800 |
| H | -2.14978300 | -1.95518700 | -2.87158500 |
| C | -2.87644000 | -5.26699100 | -3.21428000 |
| H | -2.85058300 | -6.71235300 | -1.61008900 |
| H | -2.81788200 | -3.60578600 | -4.59273100 |
| H | -3.17171000 | -5.98932800 | -3.97058100 |

## D

|   |             |             |             |
|---|-------------|-------------|-------------|
| C | -4.15715000 | -0.95209500 | -0.89520300 |
| C | -3.02399400 | -1.10318400 | 0.08113600  |
| C | -2.35992900 | 0.21810500  | 0.41430100  |
| C | -2.88521700 | 1.42387100  | -0.01430700 |
| C | -4.00797600 | 1.47544600  | -0.85088300 |
| C | -4.62068600 | 0.26668900  | -1.29290100 |
| H | -4.65257000 | -1.85915300 | -1.22600500 |
| H | -3.50096900 | -1.45868400 | 1.02440400  |
| H | -2.39390000 | 2.34246800  | 0.29458800  |
| H | -4.39585400 | 2.43381900  | -1.18168100 |
| H | -5.47415600 | 0.32323200  | -1.96427200 |
| C | -1.13650600 | 0.21584800  | 1.21917900  |
| O | -0.58619700 | 1.20975300  | 1.70795000  |
| N | -0.63668000 | -1.06814600 | 1.40723900  |
| O | 0.63433800  | -1.17352900 | 2.01175700  |
| C | 1.41098200  | -1.99325600 | 1.10159600  |
| C | 0.39423200  | -2.99157000 | 0.54661300  |
| H | 2.20883500  | -2.43824500 | 1.69784100  |
| H | 1.83356700  | -1.35928300 | 0.31227500  |
| H | 0.66842900  | -3.37971800 | -0.43677100 |
| H | 0.27127300  | -3.83651100 | 1.23414500  |
| C | -0.85210500 | -2.14112100 | 0.50438900  |
| C | -1.98023100 | -2.20171600 | -0.22408000 |
| C | -2.22526100 | -3.29686200 | -1.19560100 |
| C | -2.17989900 | -4.64176100 | -0.78646100 |
| C | -2.48538100 | -3.02179800 | -2.55202400 |

|   |             |             |             |
|---|-------------|-------------|-------------|
| C | -2.38043500 | -5.67768400 | -1.70160800 |
| H | -1.99800400 | -4.87419700 | 0.25921100  |
| C | -2.68989200 | -4.05711500 | -3.46467000 |
| H | -2.51278000 | -1.99115000 | -2.89453900 |
| C | -2.63781500 | -5.38949000 | -3.04370300 |
| H | -2.34183200 | -6.70978100 | -1.36227800 |
| H | -2.88328000 | -3.82245400 | -4.50841700 |
| H | -2.79693400 | -6.19472500 | -3.75623500 |

1 M. J. Frisch, G. W. Trucks, H. B. Schlegel, G. E. Scuseria, M. A. Robb, J. R. Cheeseman, G. Scalmani, V. Barone, B. Mennucci, G. A. Petersson, H. Nakatsuji, M. Caricato, X. Li, H. P. Hratchian, A. F. Izmaylov, J. Bloino, G. Zheng, J. L. Sonnenberg, M. Hada, M. Ehara, K. Toyota, R. Fukuda, J. Hasegawa, M. Ishida, T. Nakajima, Y. Honda, O. Kitao, H. Nakai, T. Vreven, J. A. Montgomery, Jr., J. E. Peralta, F. Ogliaro, M. Bearpark, J. J. Heyd, E. Brothers, K. N. Kudin, V. N. Staroverov, R. Kobayashi, J. Normand, K. Raghavachari, A. Rendell, J. C. Burant, S. S. Iyengar, J. Tomasi, M. Cossi, N. Rega, J. M. Millam, M. Klene, J. E. Knox, J. B. Cross, V. Bakken, C. Adamo, J. Jaramillo, R. Gomperts, R. E. Stratmann, O. Yazyev, A. J. Austin, R. Cammi, C. Pomelli, J. W. Ochterski, R. L. Martin, K. Morokuma, V. G. Zakrzewski, G. A. Voth, P. Salvador, J. J. Dannenberg, S. Dapprich, A. D. Daniels, Ö. Farkas, J. B. Foresman, J. V. Ortiz, J. Cioslowski, D. J. Fox, Gaussian 09, Rev. D.01; Gaussian, Inc.: Wallingford, CT, **2013**.

2 P. C. Hariharan and J. A. Pople, *Theor. Chim. Acta* **1973**, *28*, 213.

3 M. S. Gordon, *Chem. Phys. Lett.* **1980**, *76*, 163.

4 R. C. J. Binning and L. A. Curtiss, *J. Comput. Chem.* **1990**, *11*, 1206.

5 K. Fukui, *J. Phys. Chem.* **1970**, *74*, 4161.

6 K. Fukui, *Acc. Chem. Res.* **1981**, *14*, 363.

7 Z.-W. Hou, Z.-Y. Mao, H.-B. Zhao, Y. Y. Melcamu, X. Lu, J. Song and H.-C. Xu, *Angew. Chem. Int. Ed.* **2016**, *55*, 9168 .

**<sup>1</sup>H NMR and <sup>13</sup>C NMR spectra of 2.**

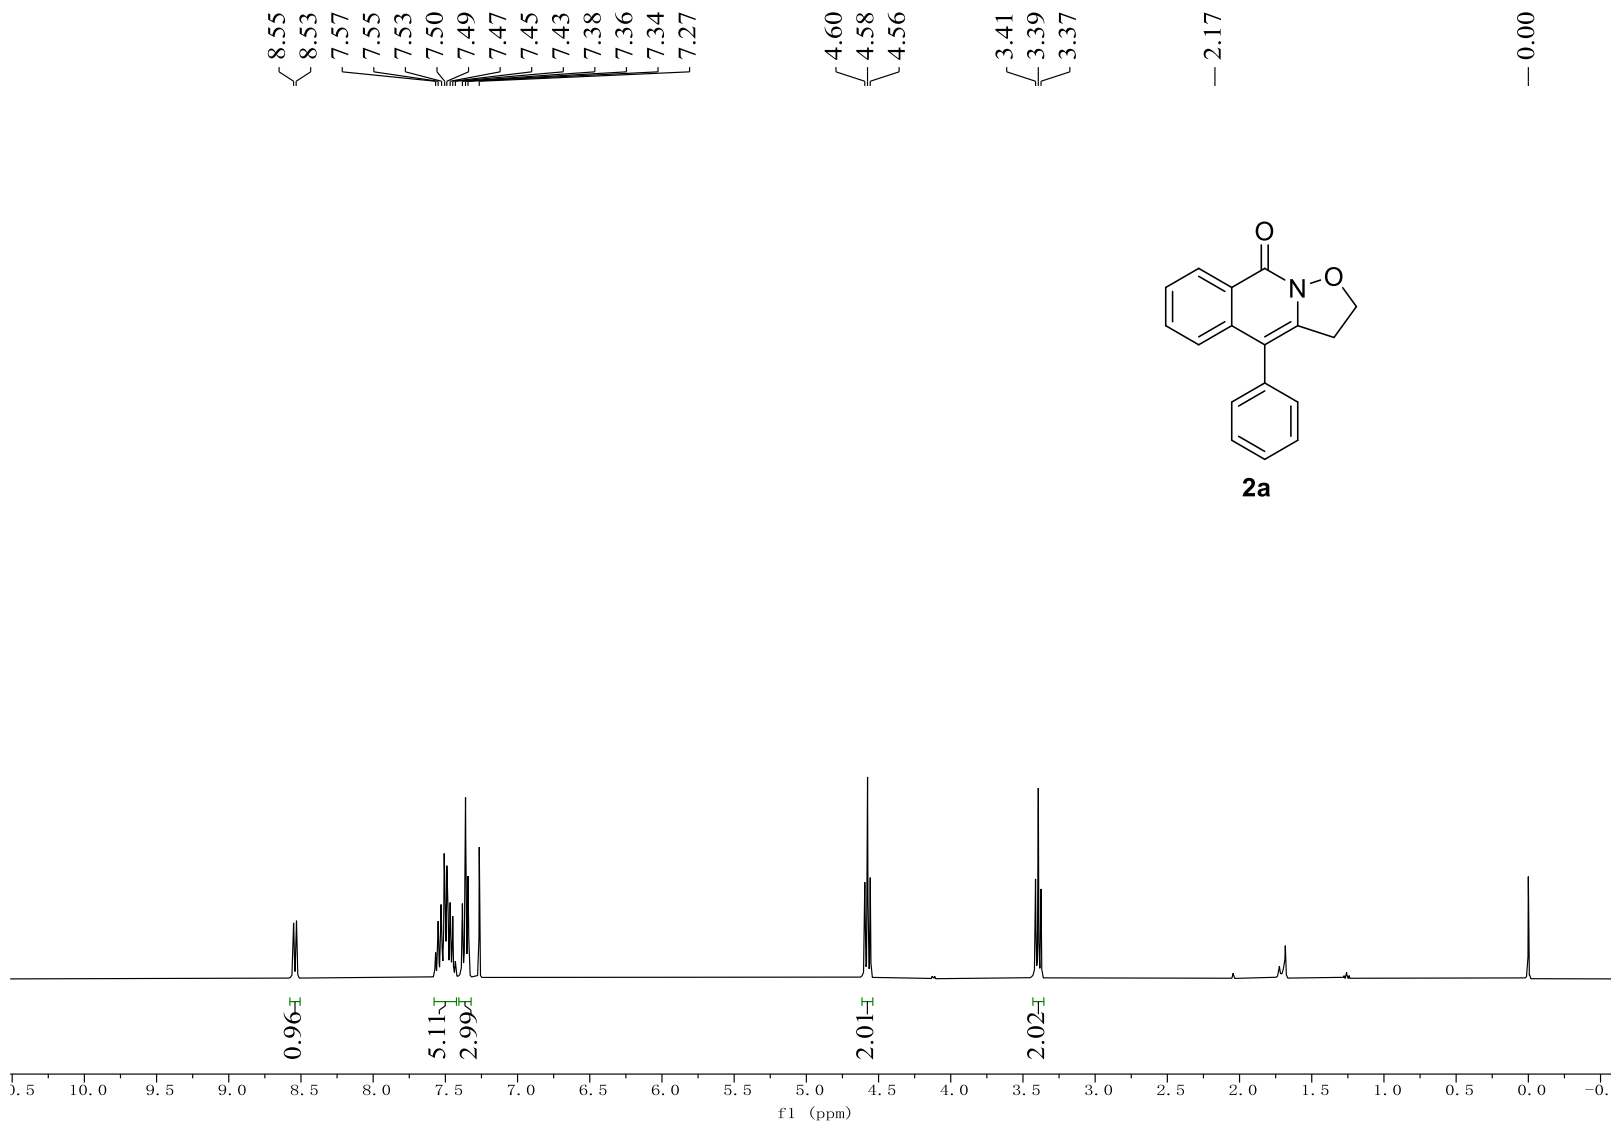

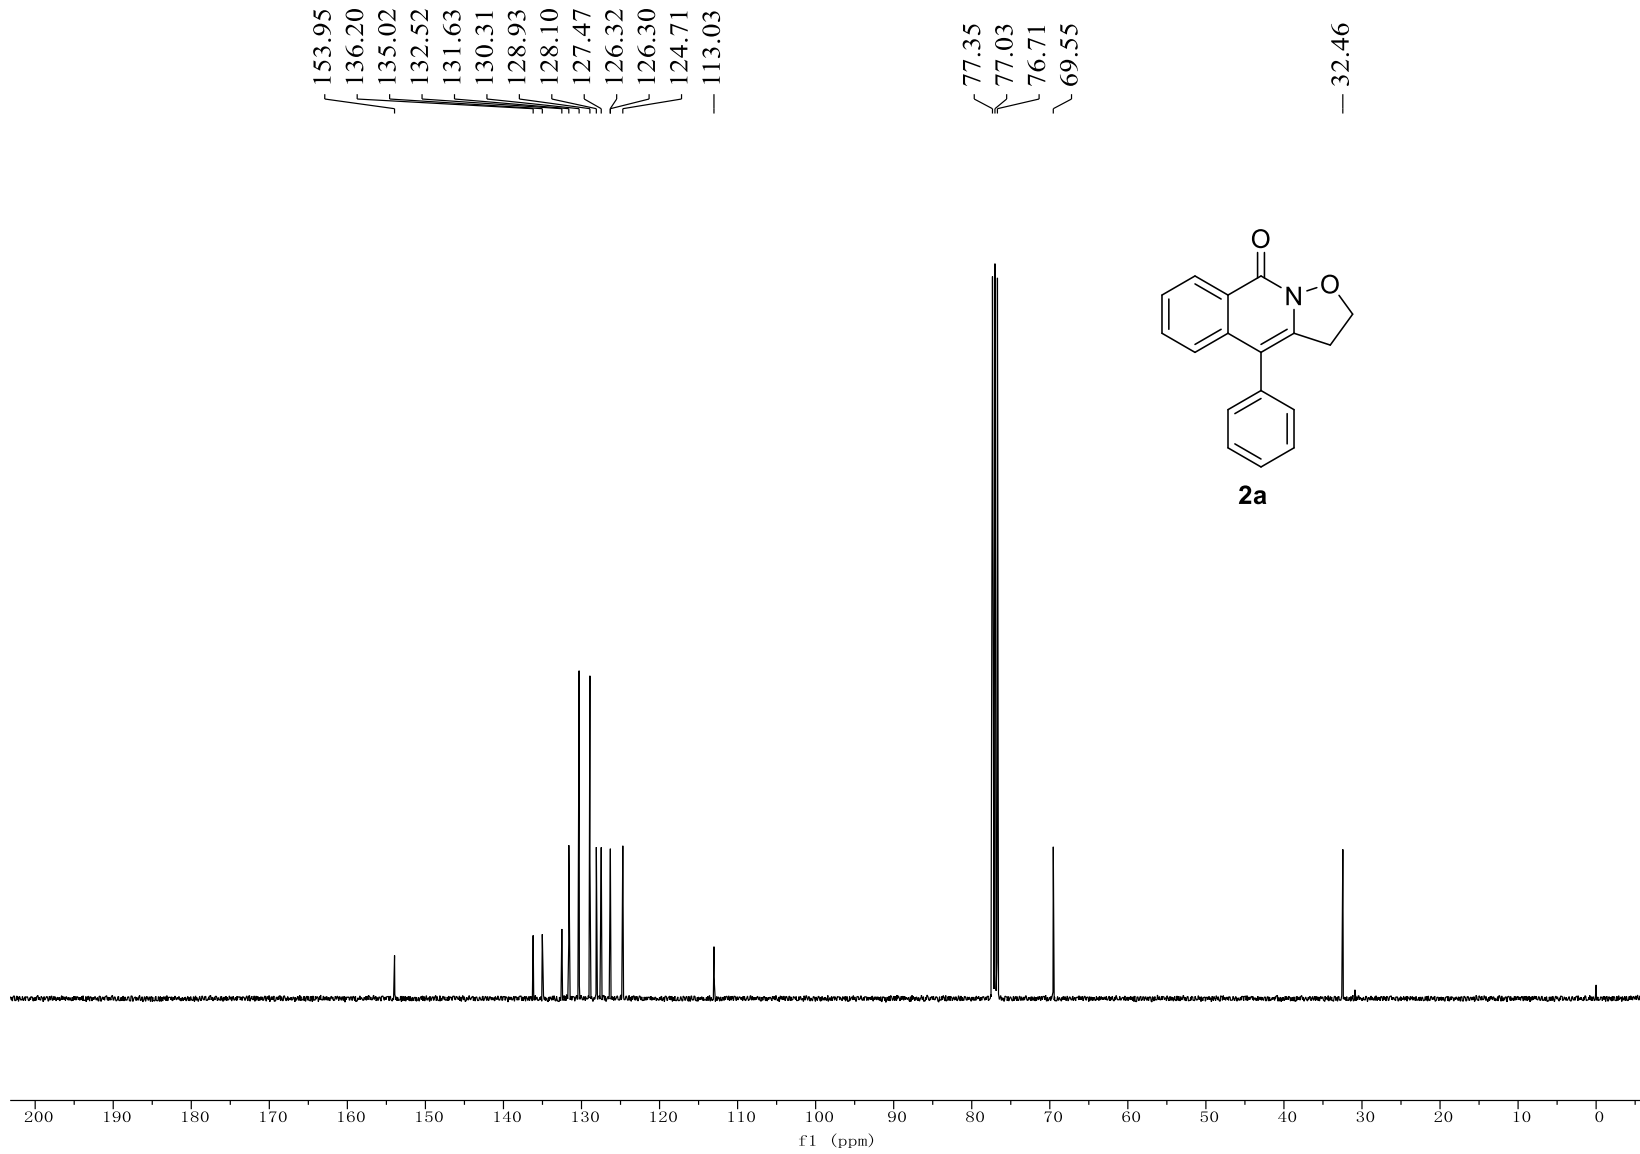

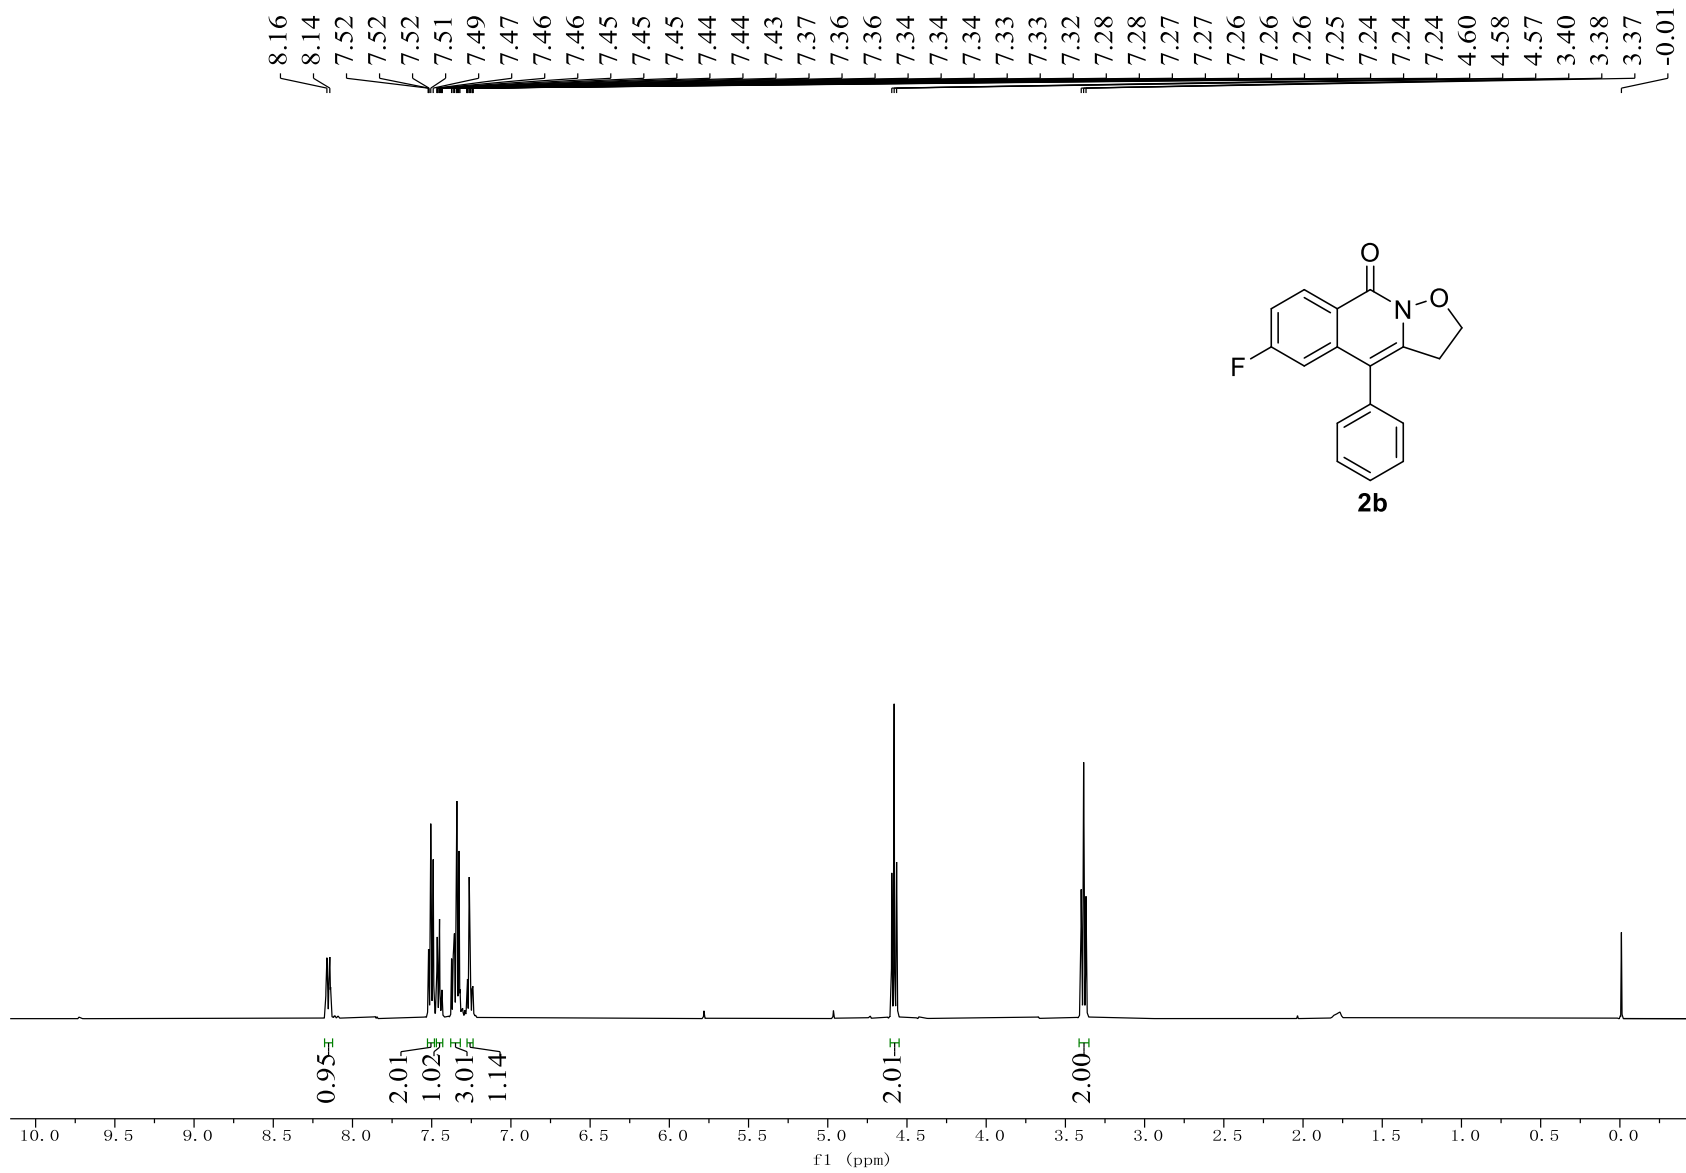

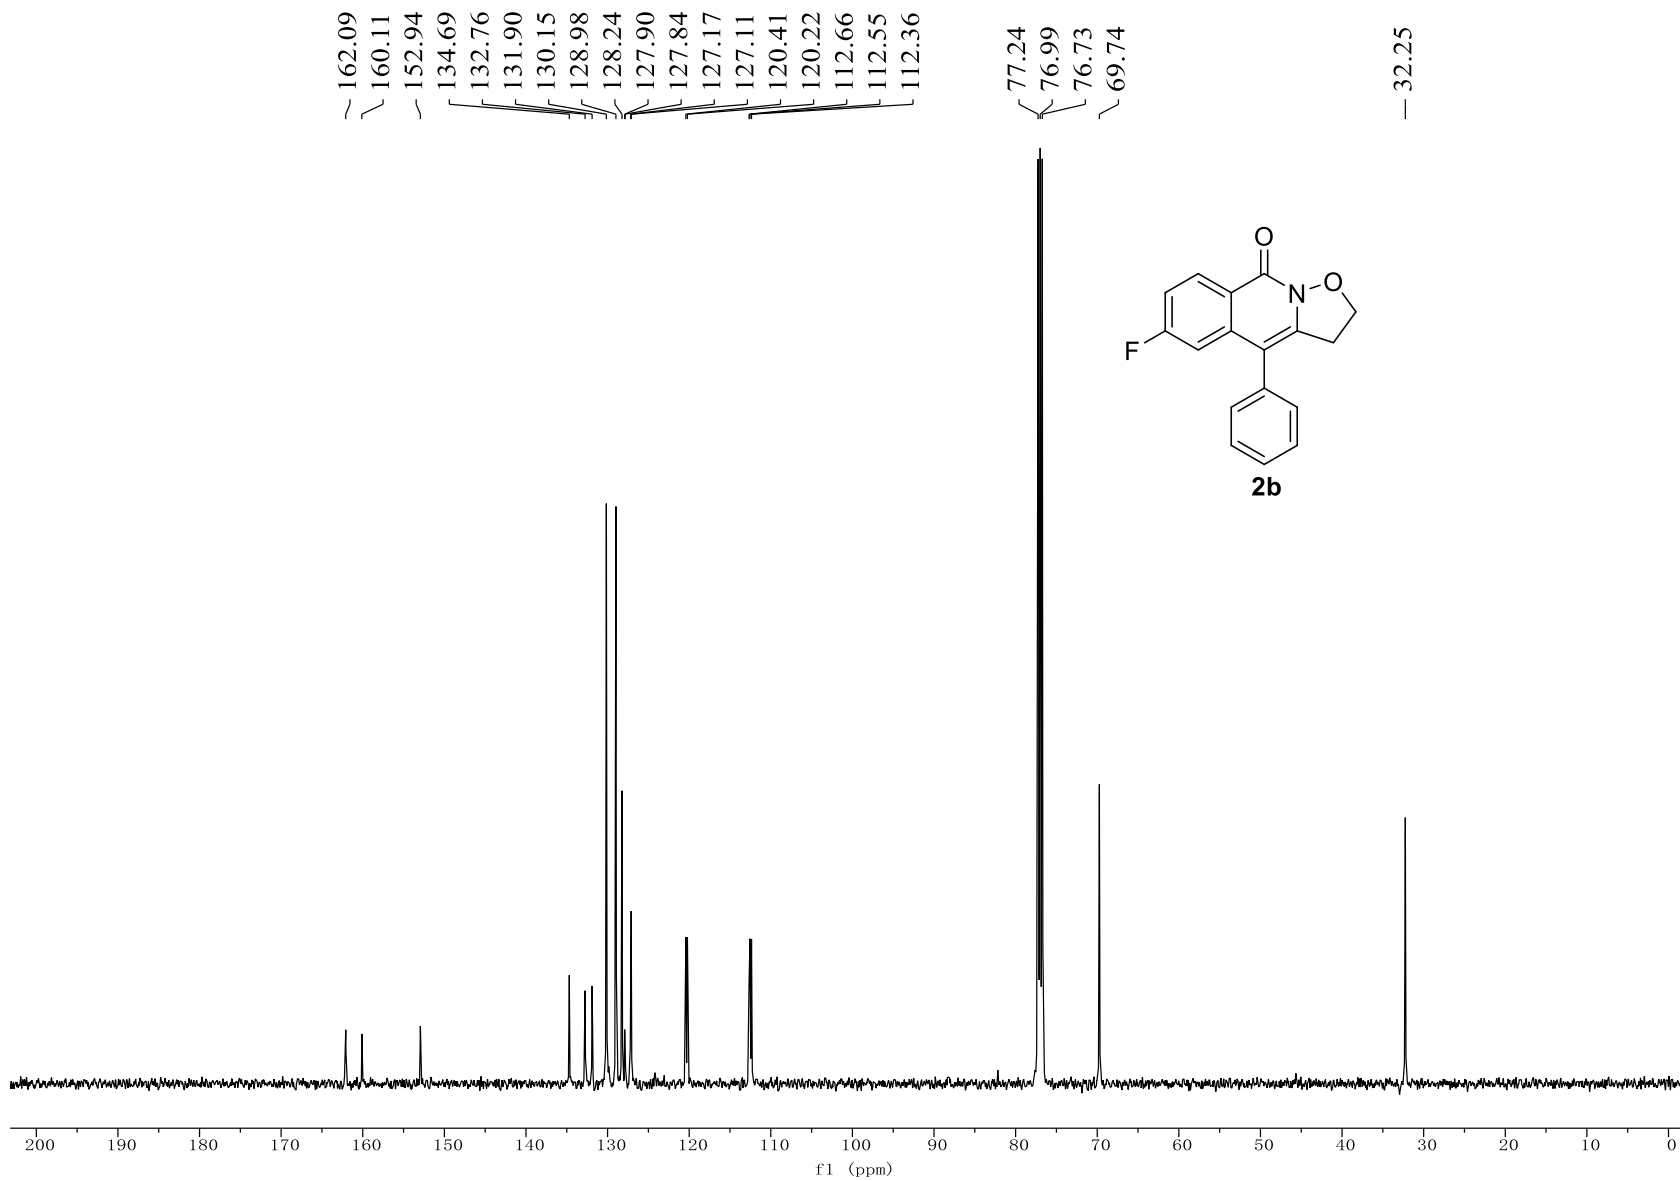

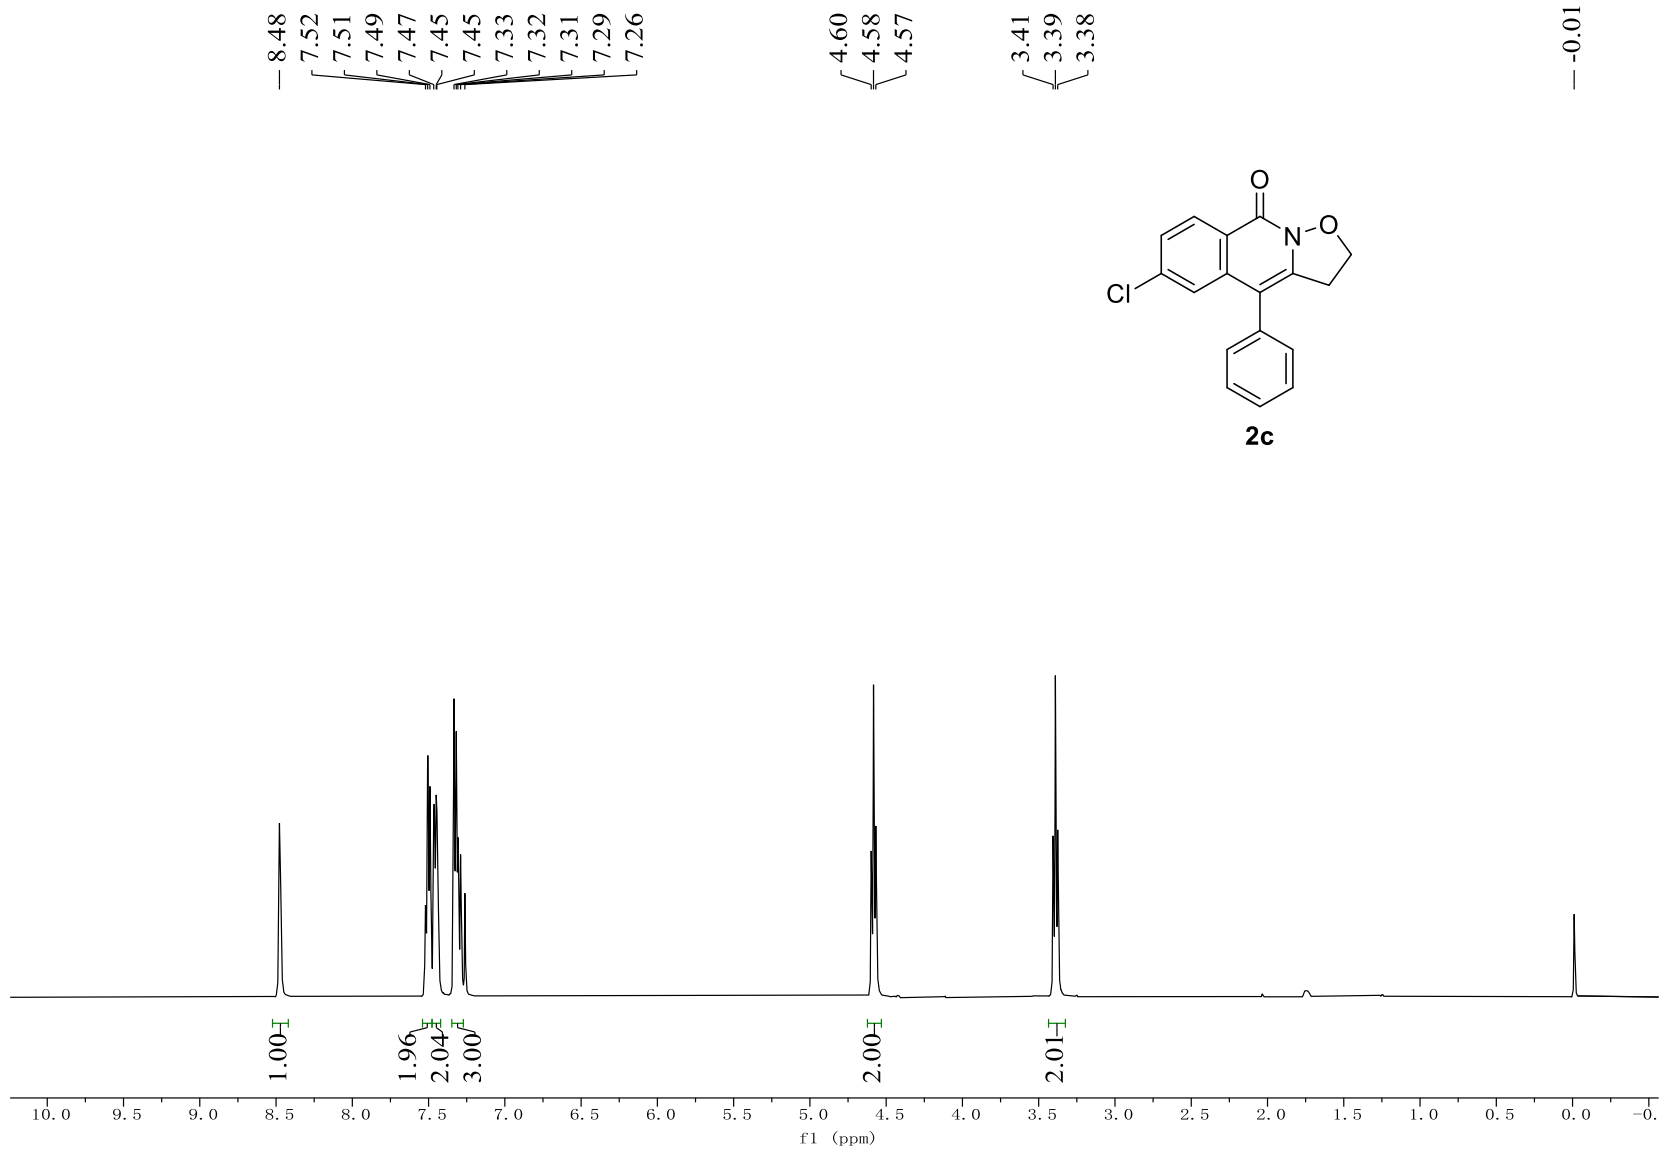

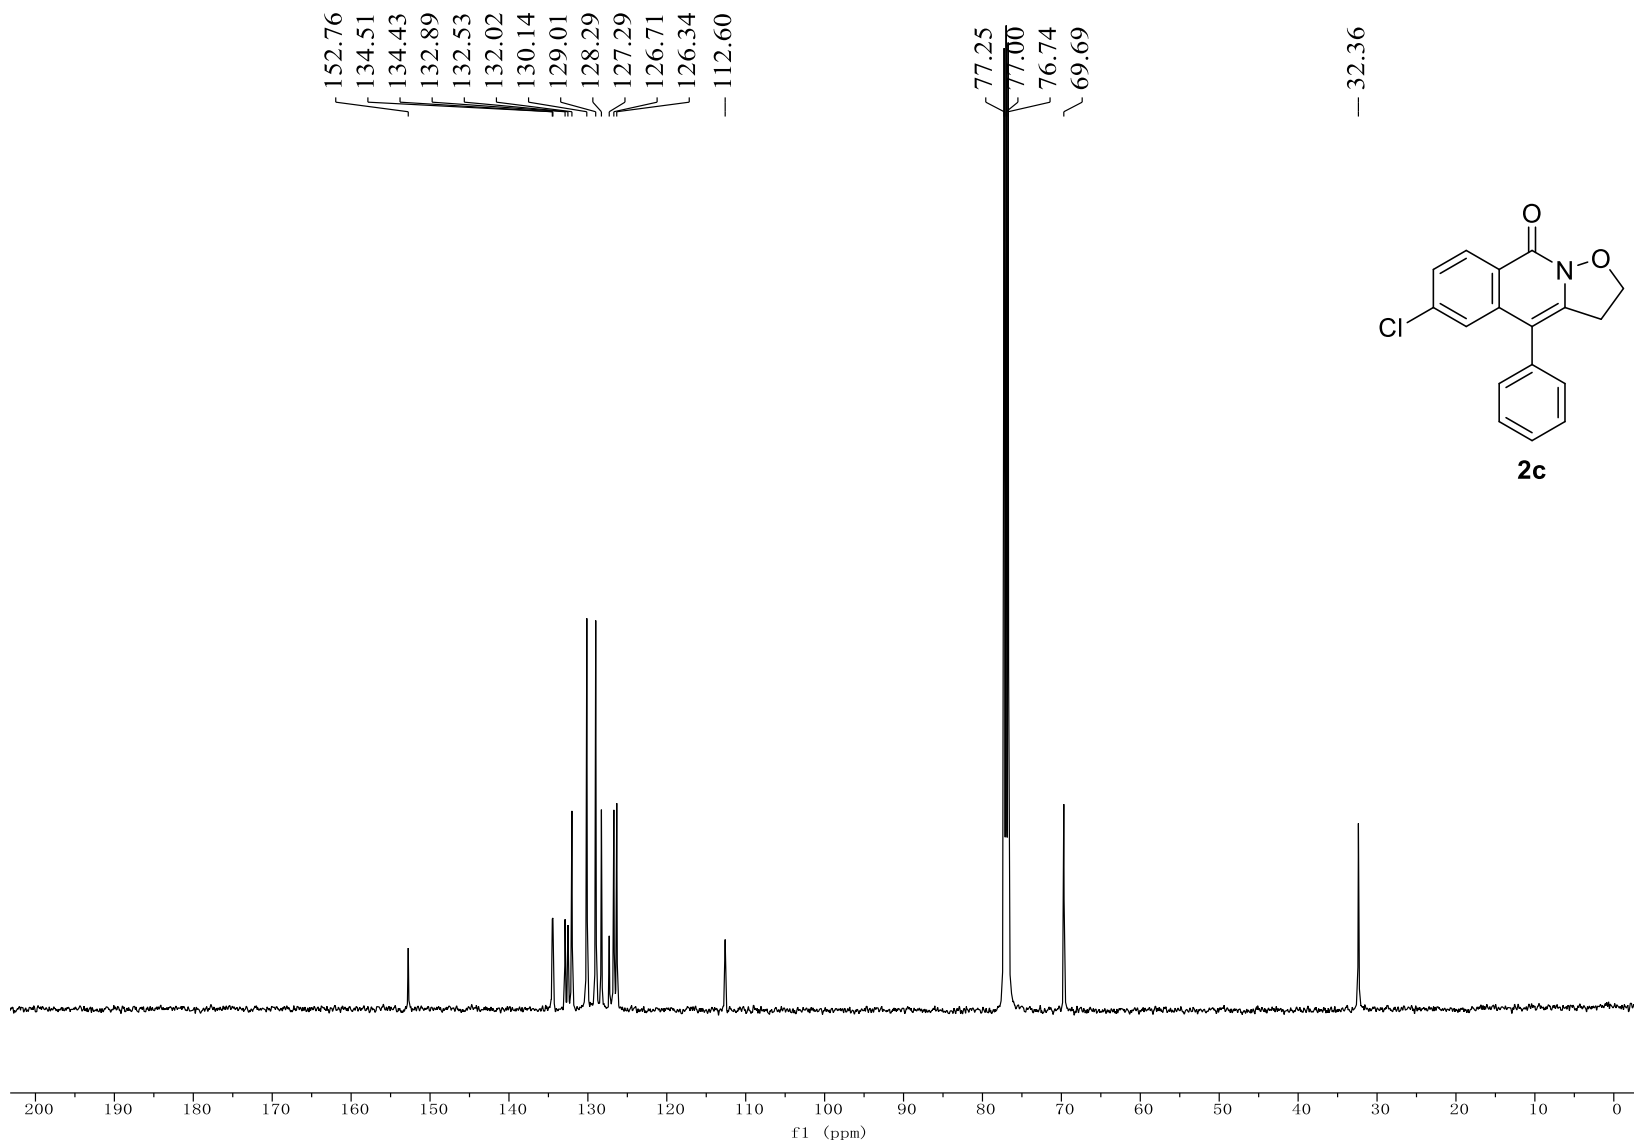



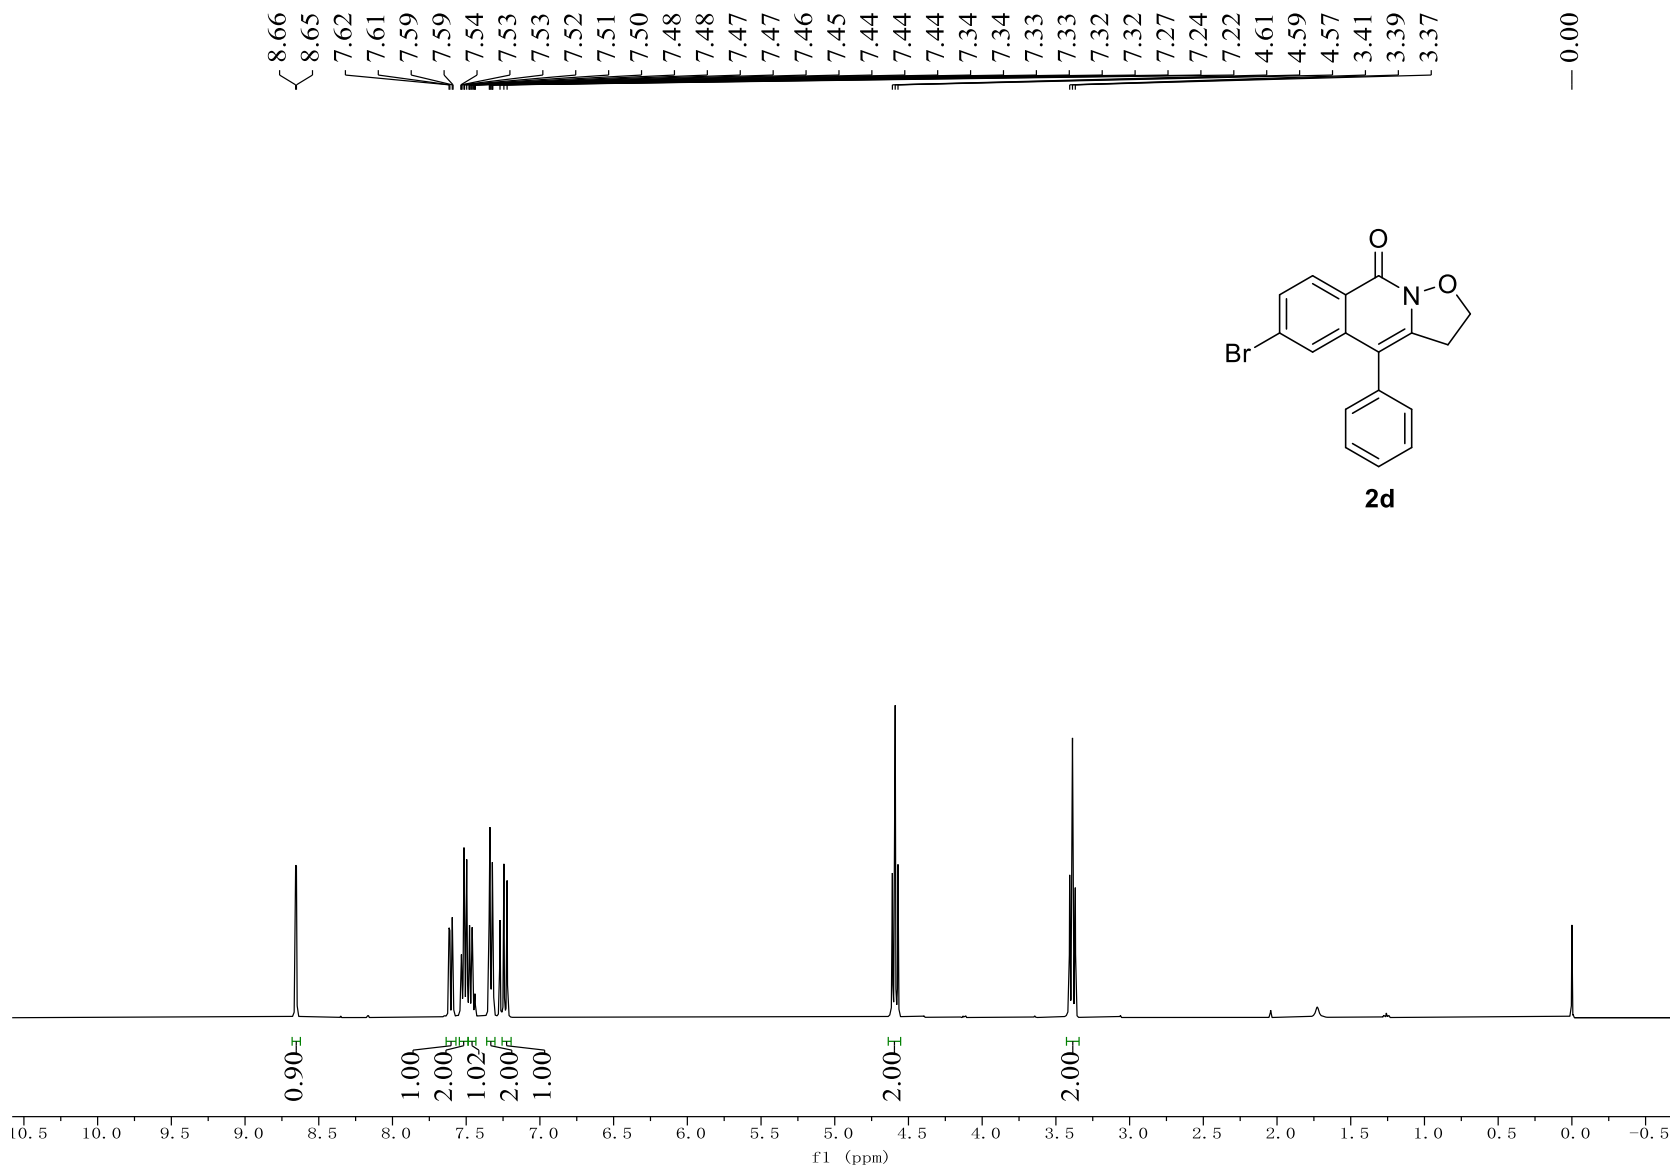

S40

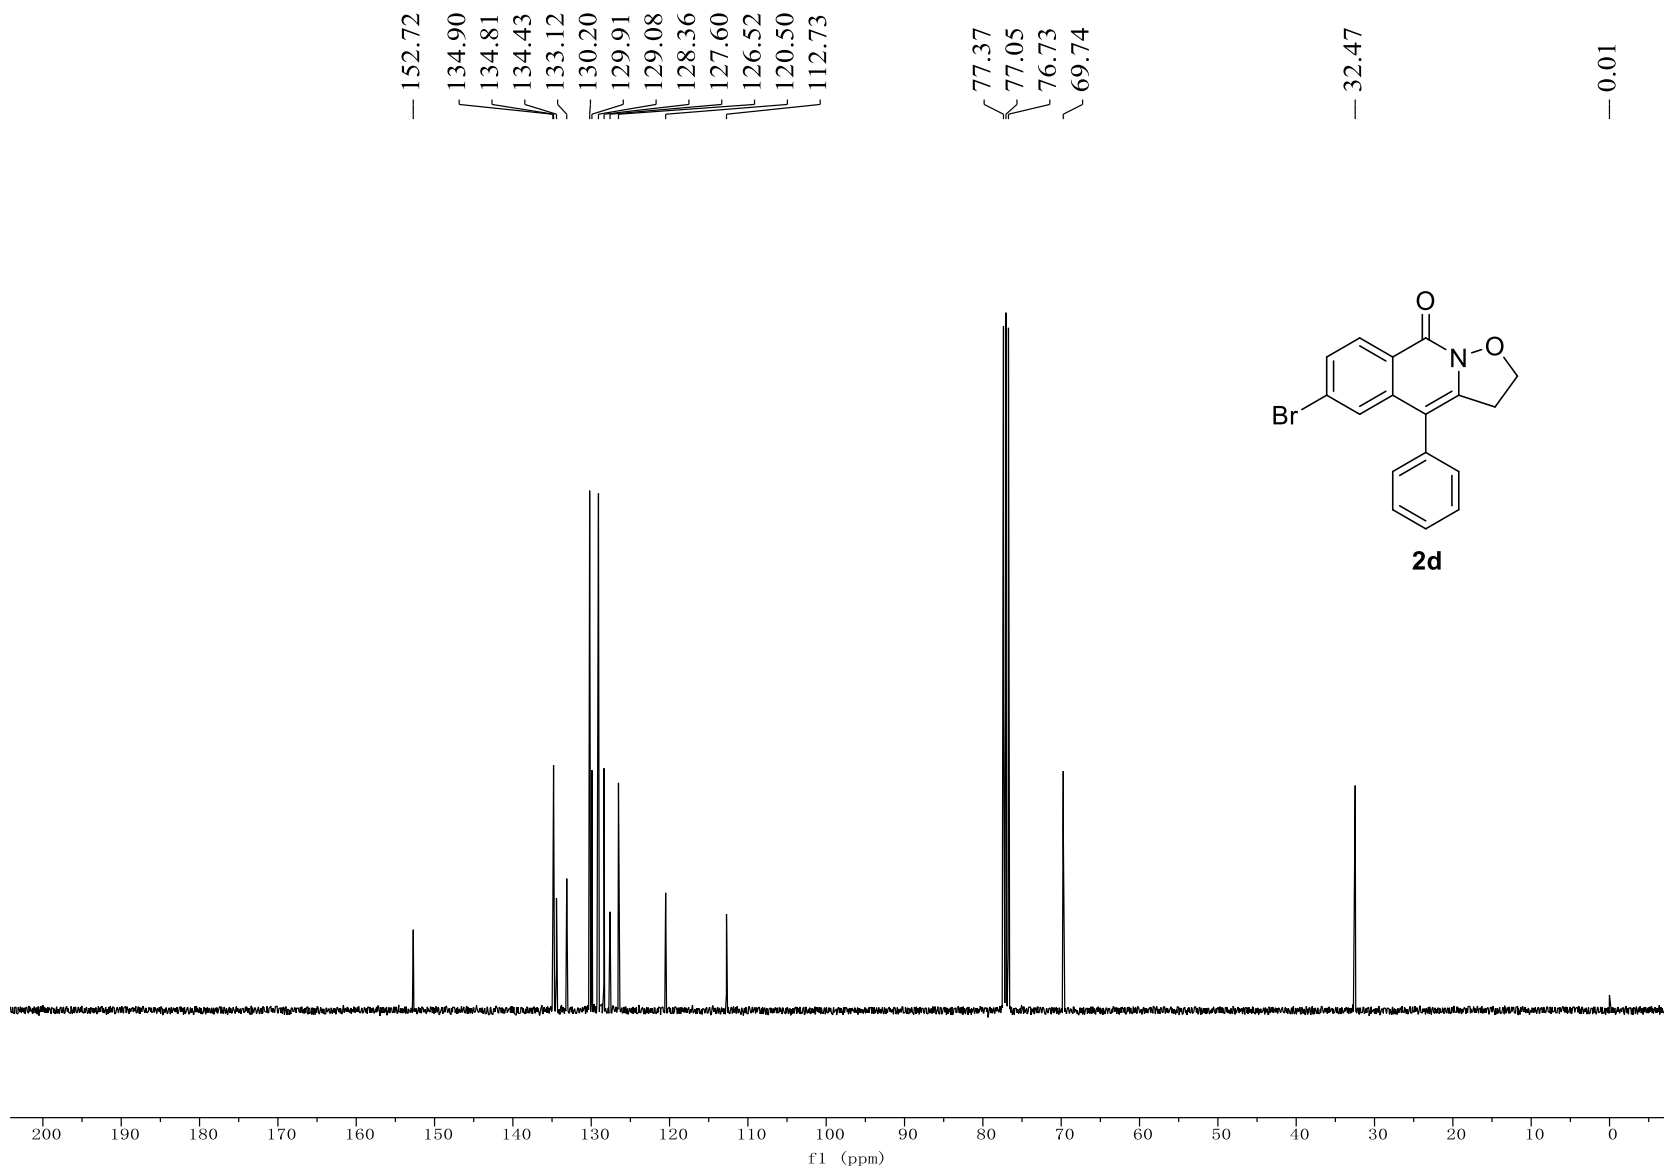

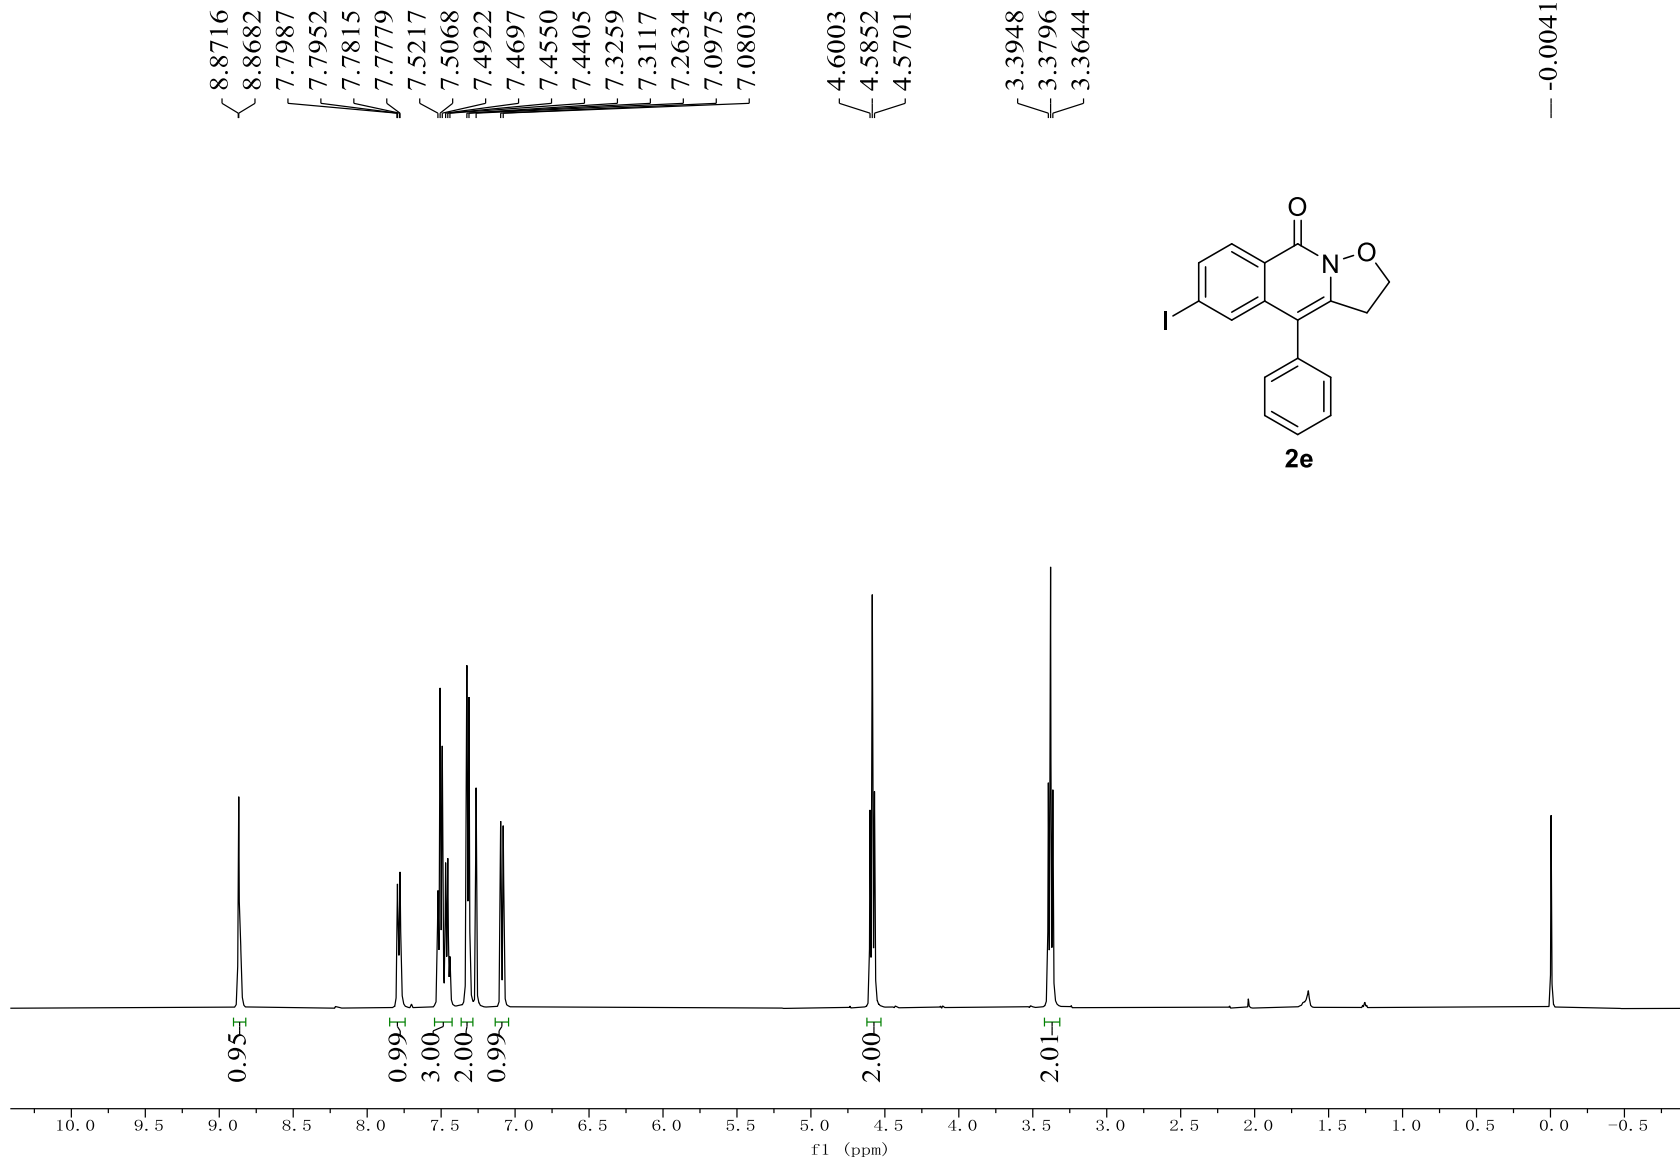

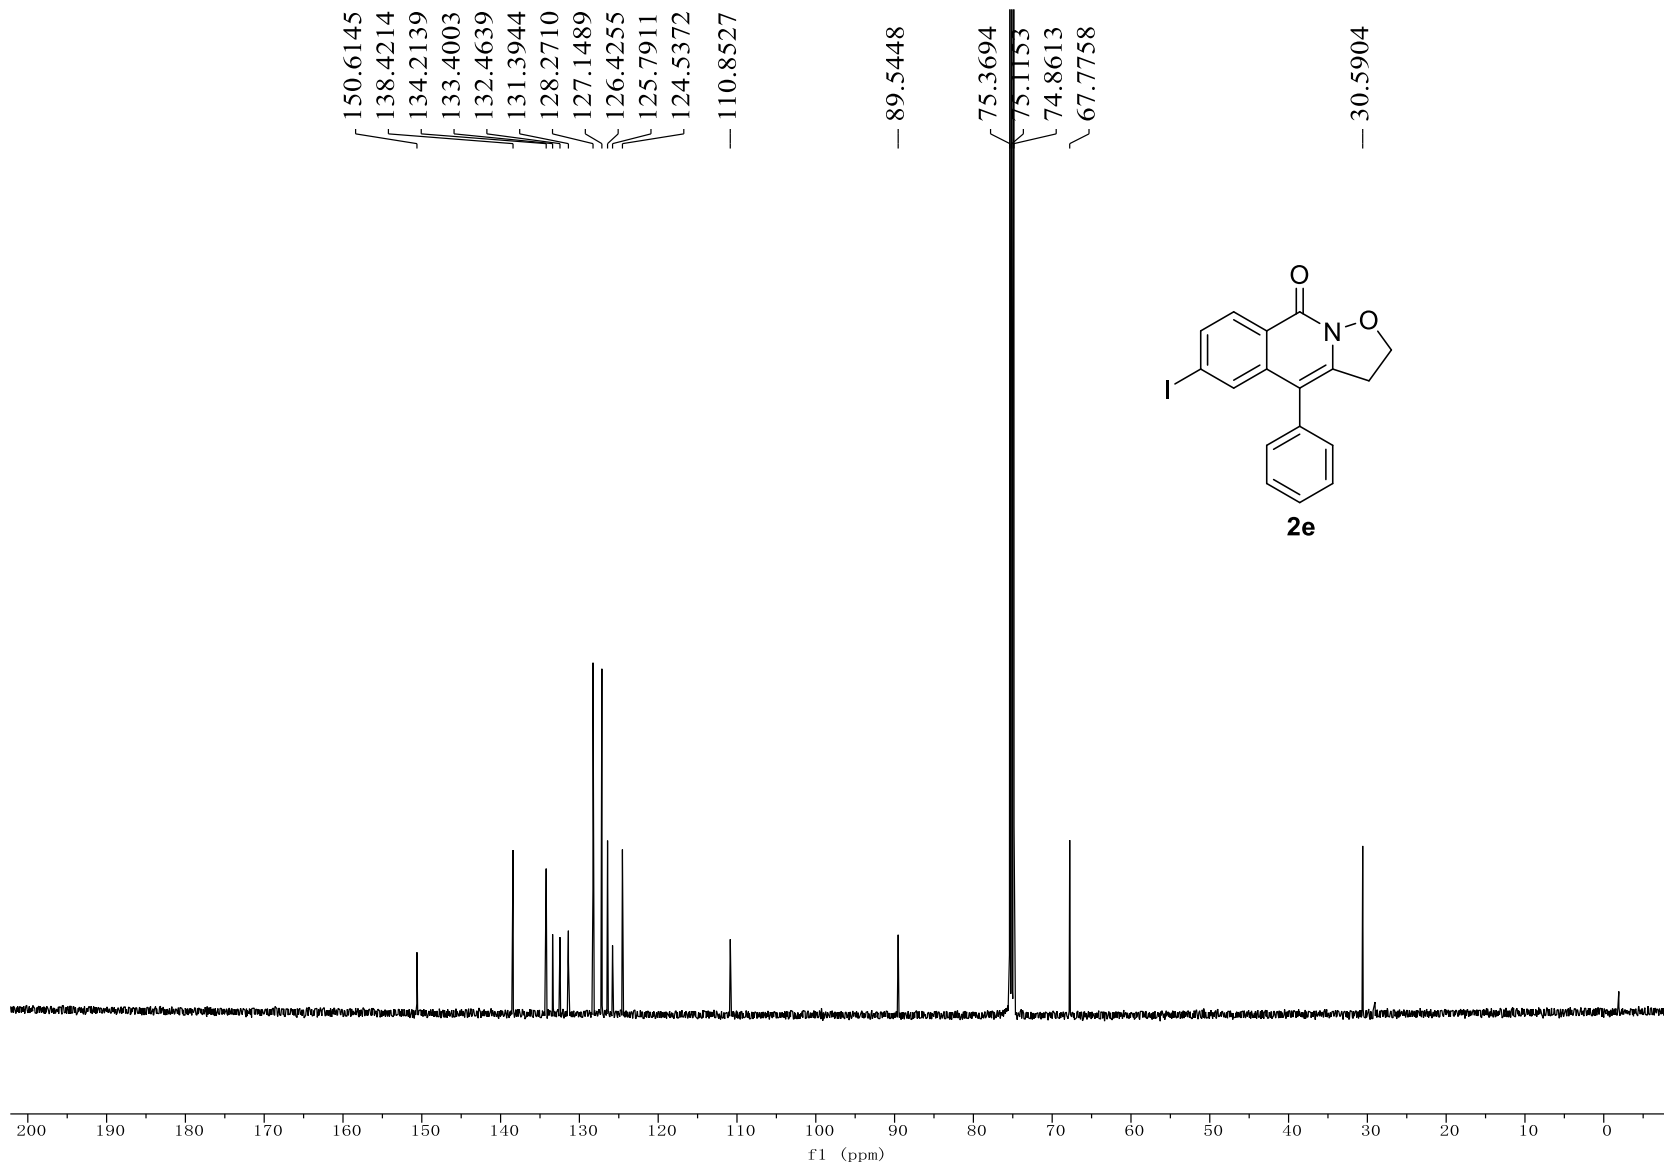

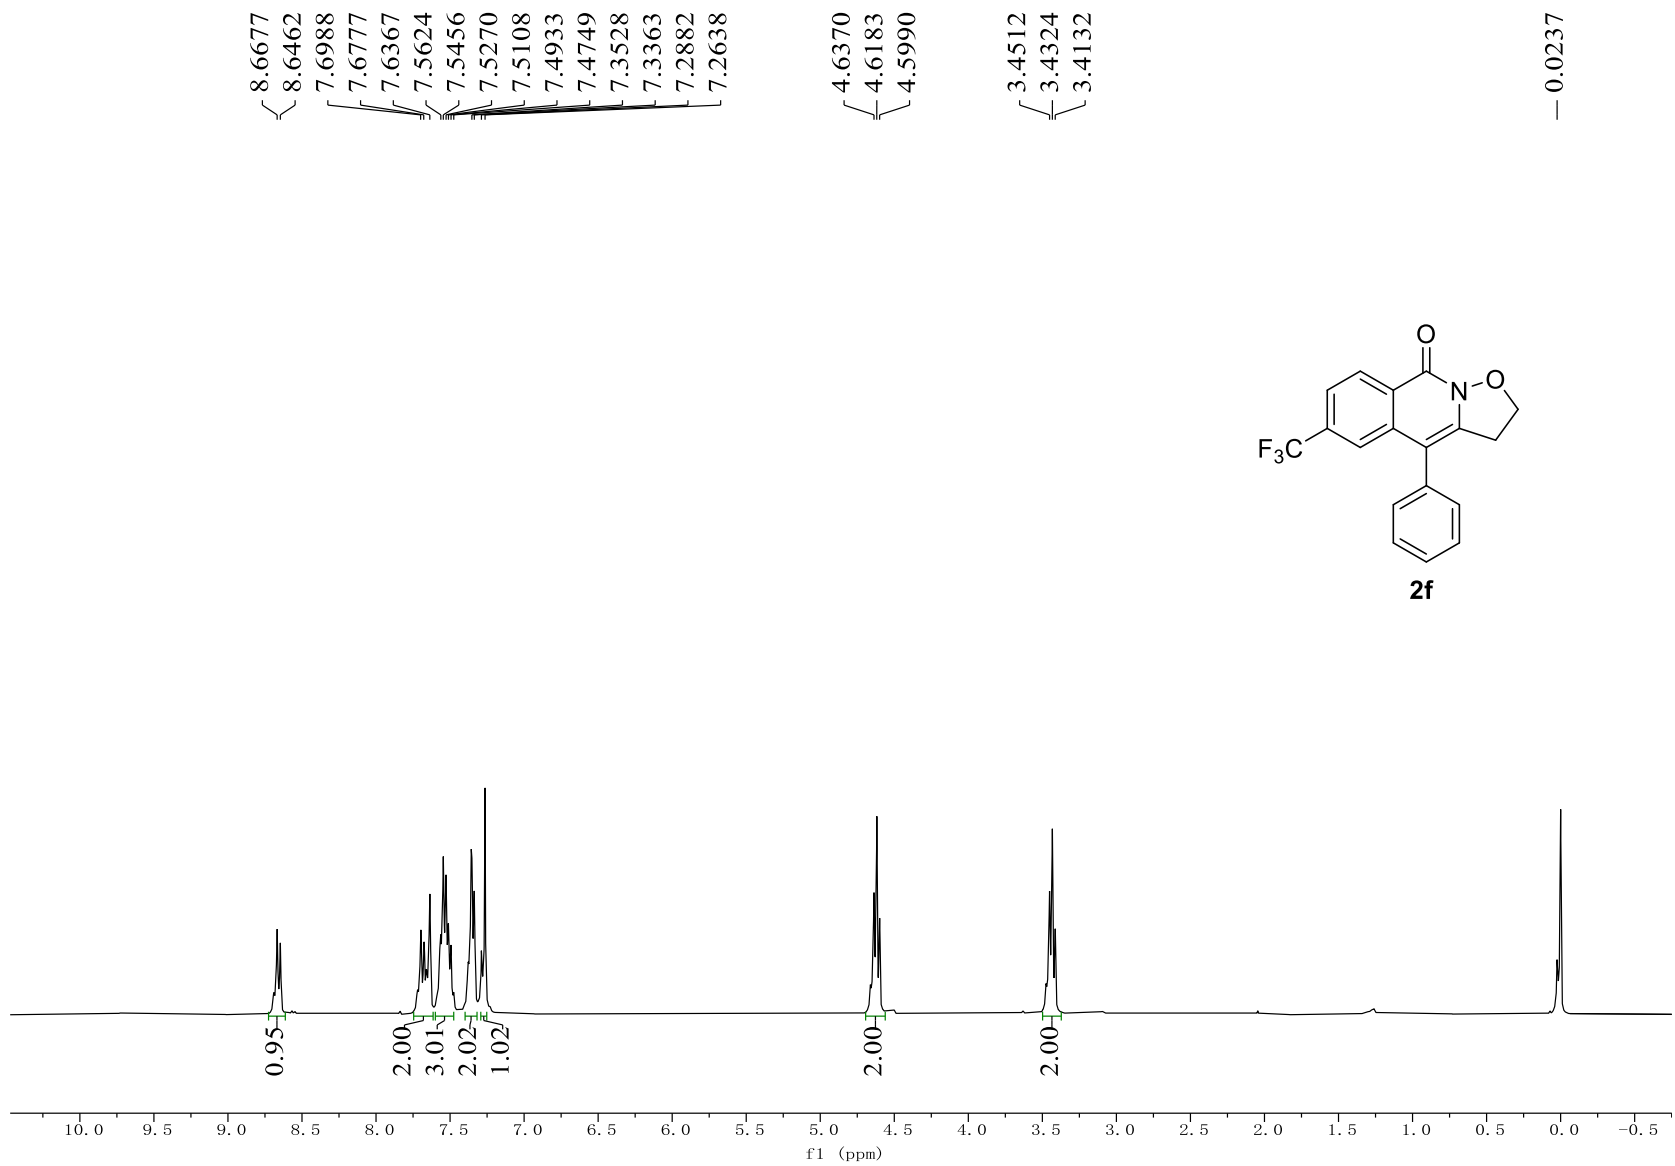

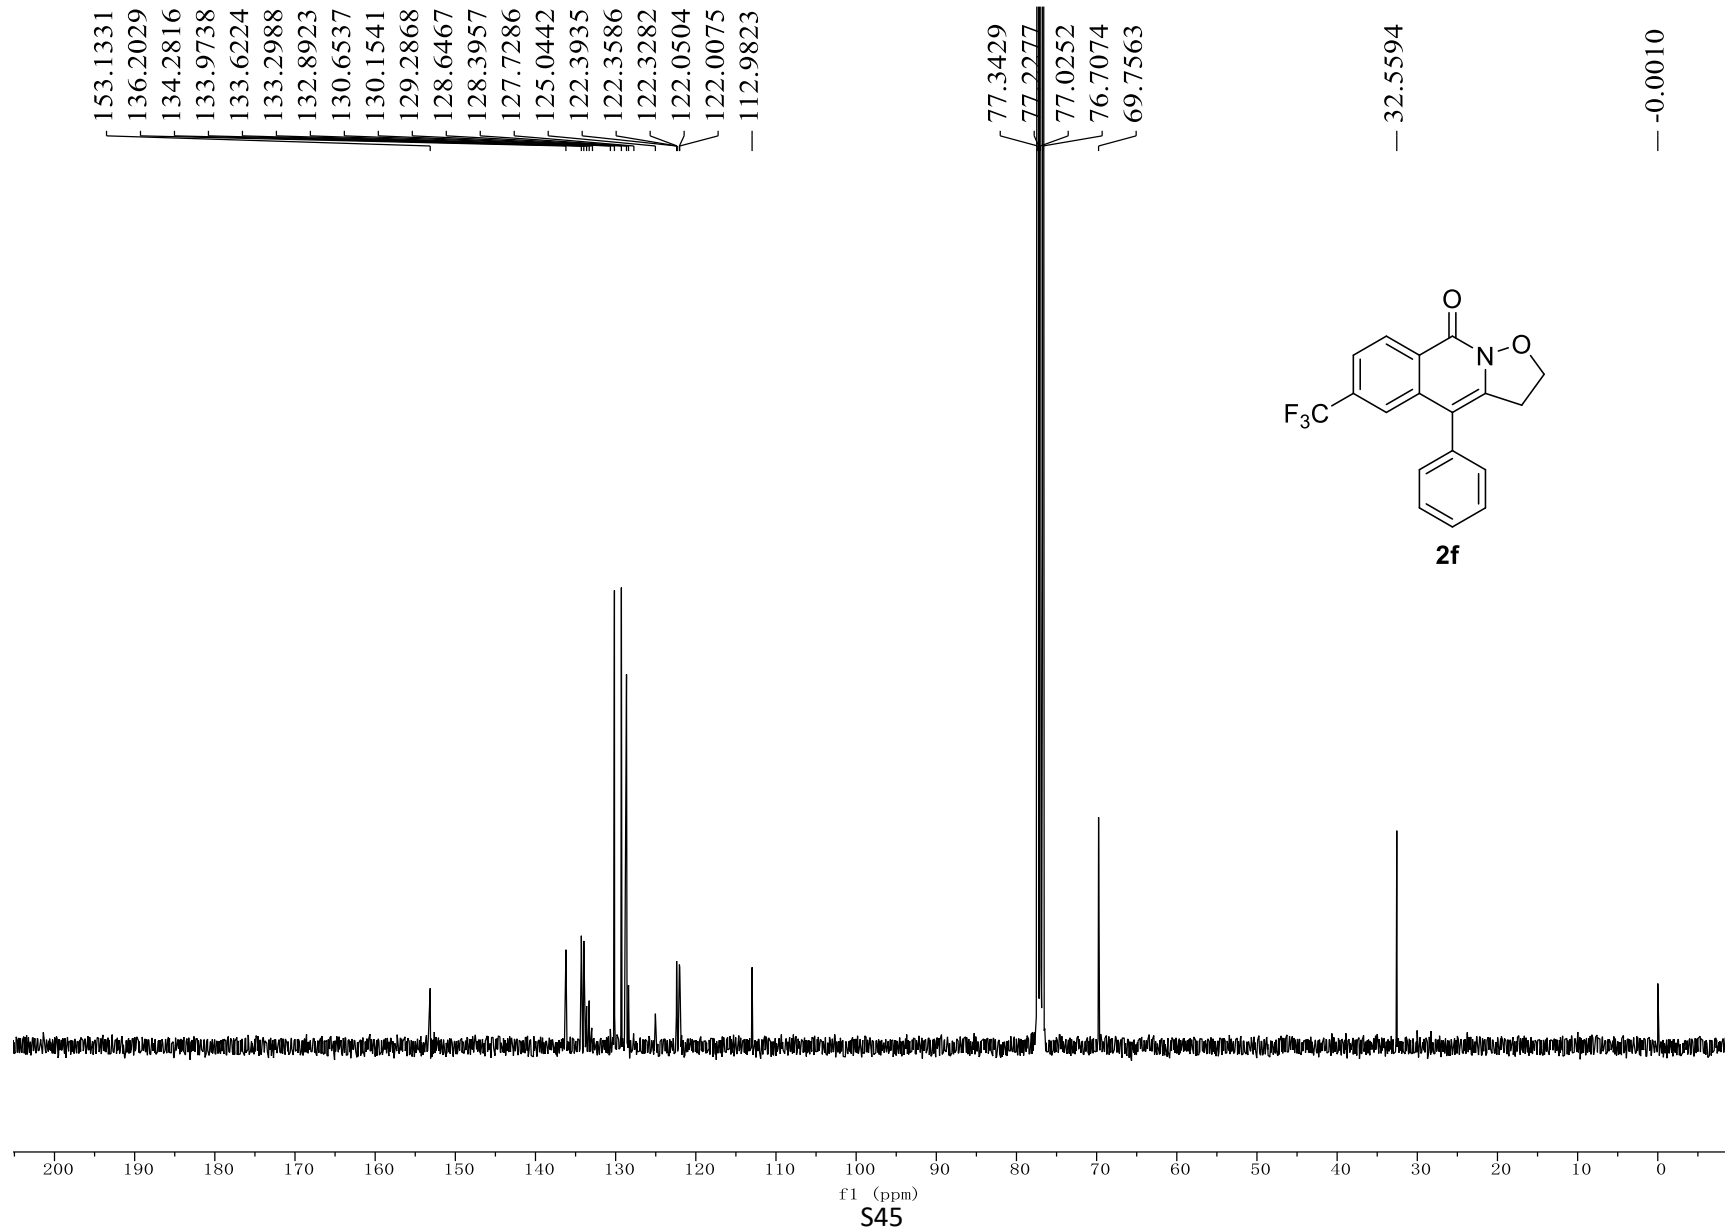

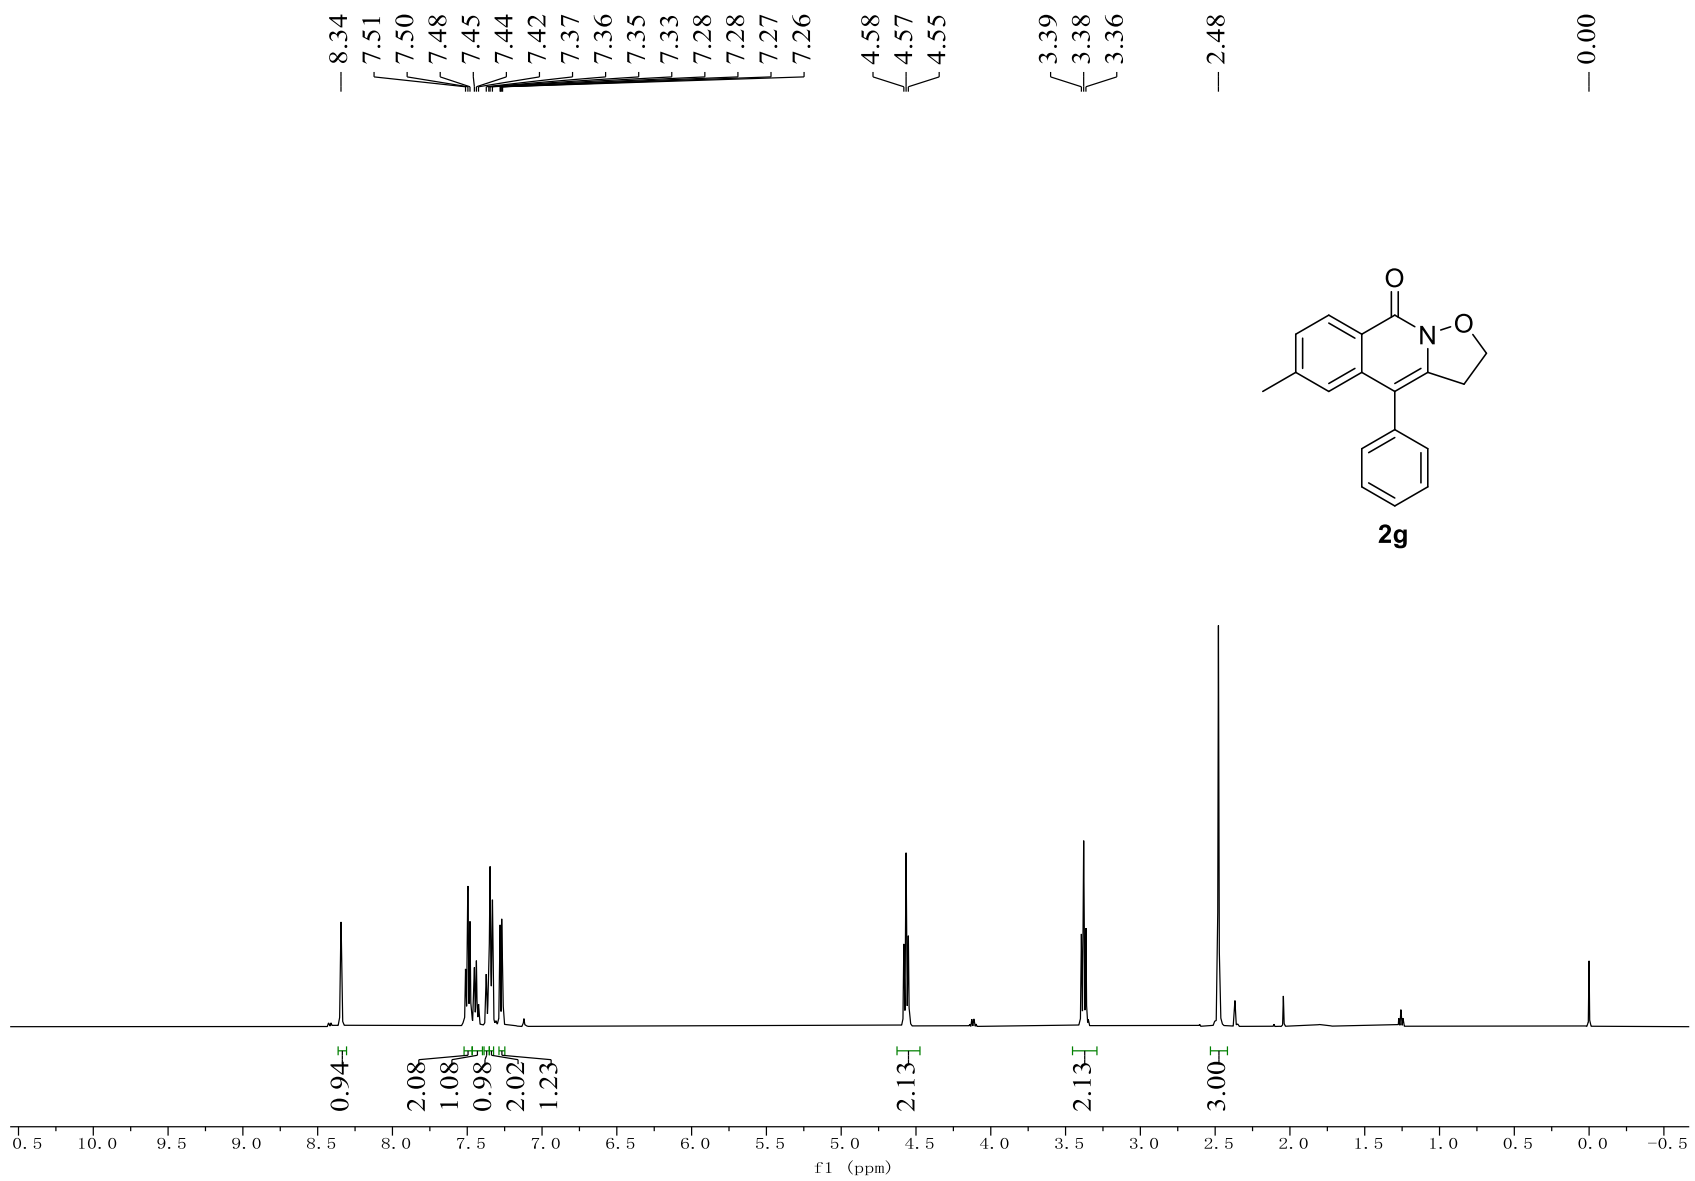

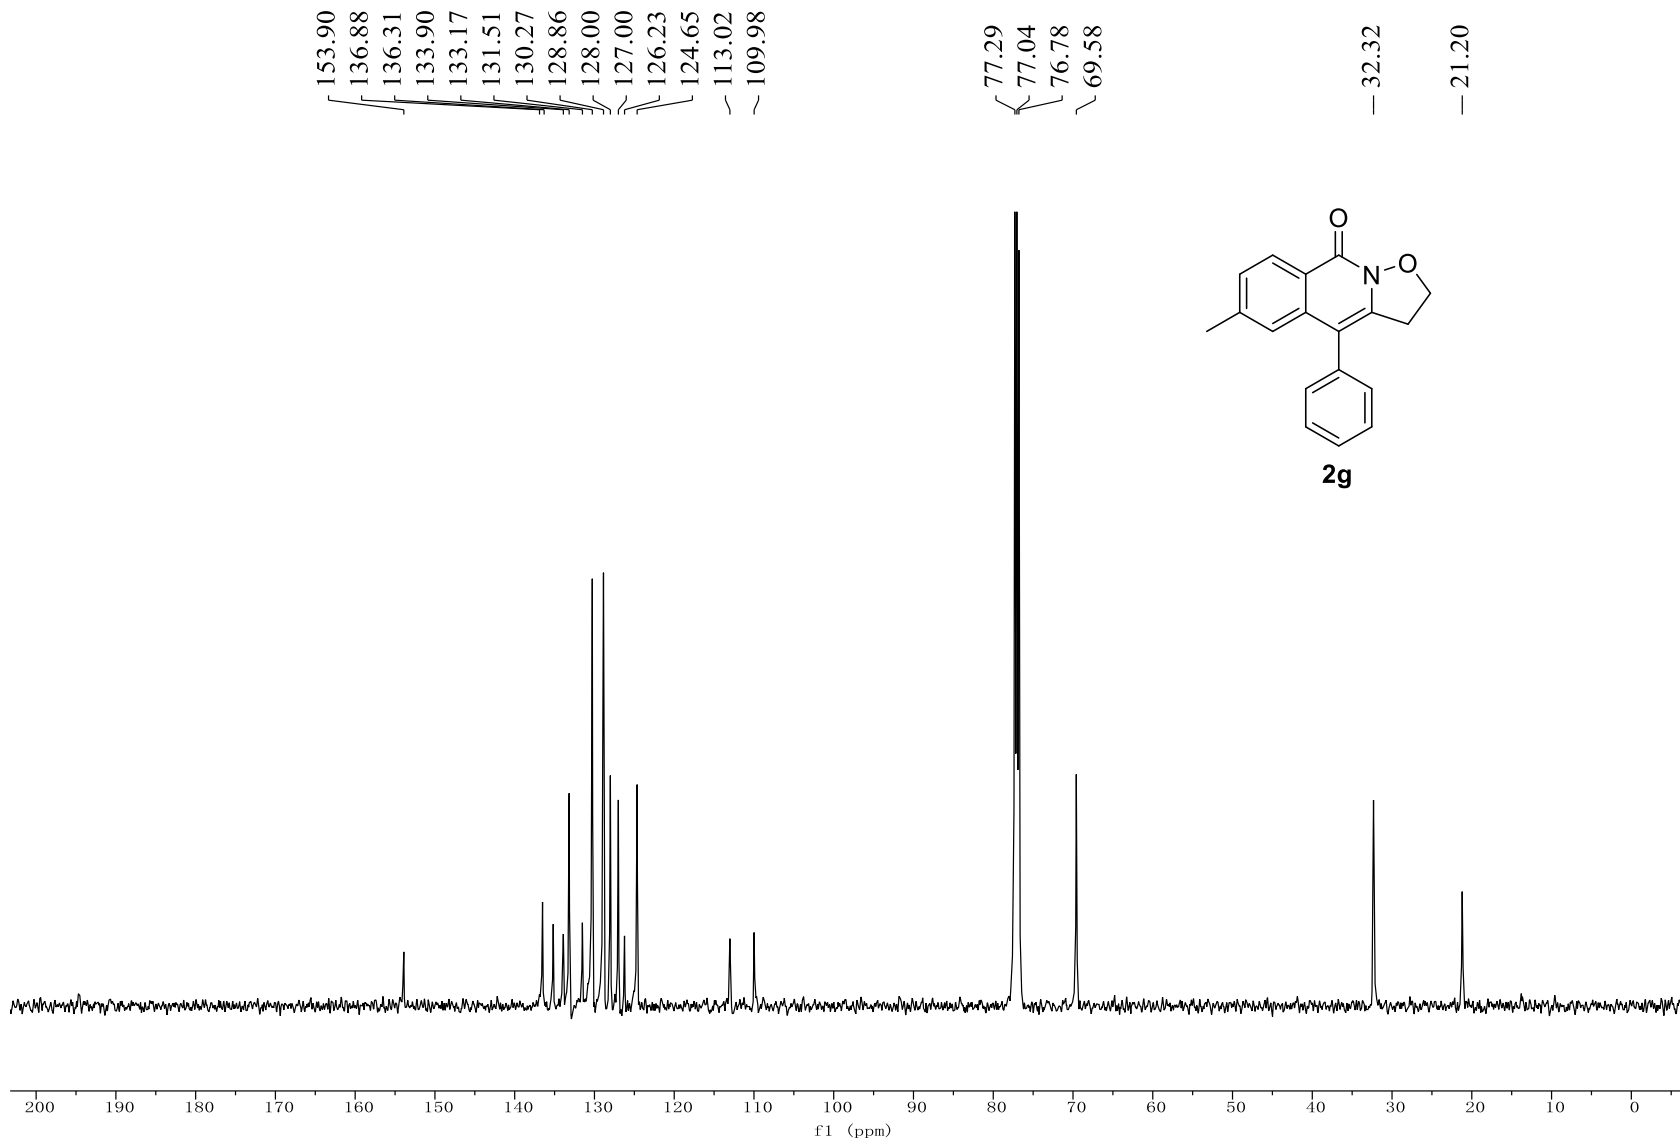



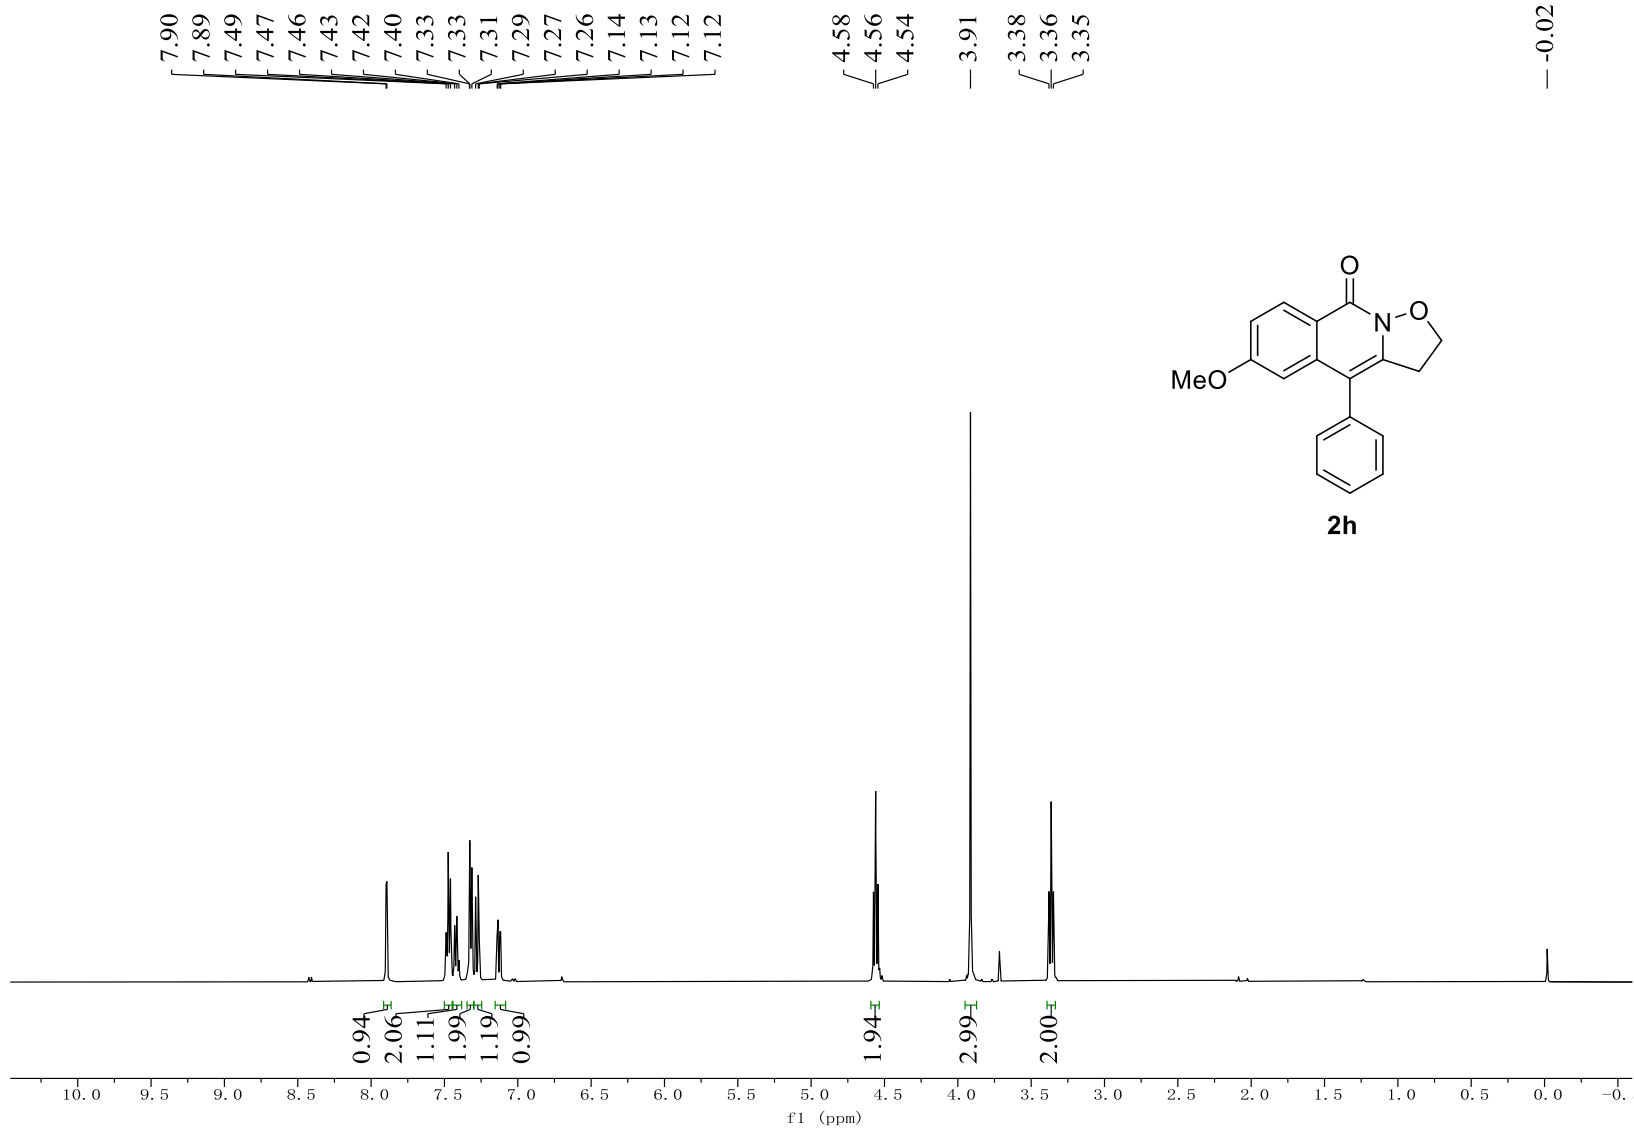

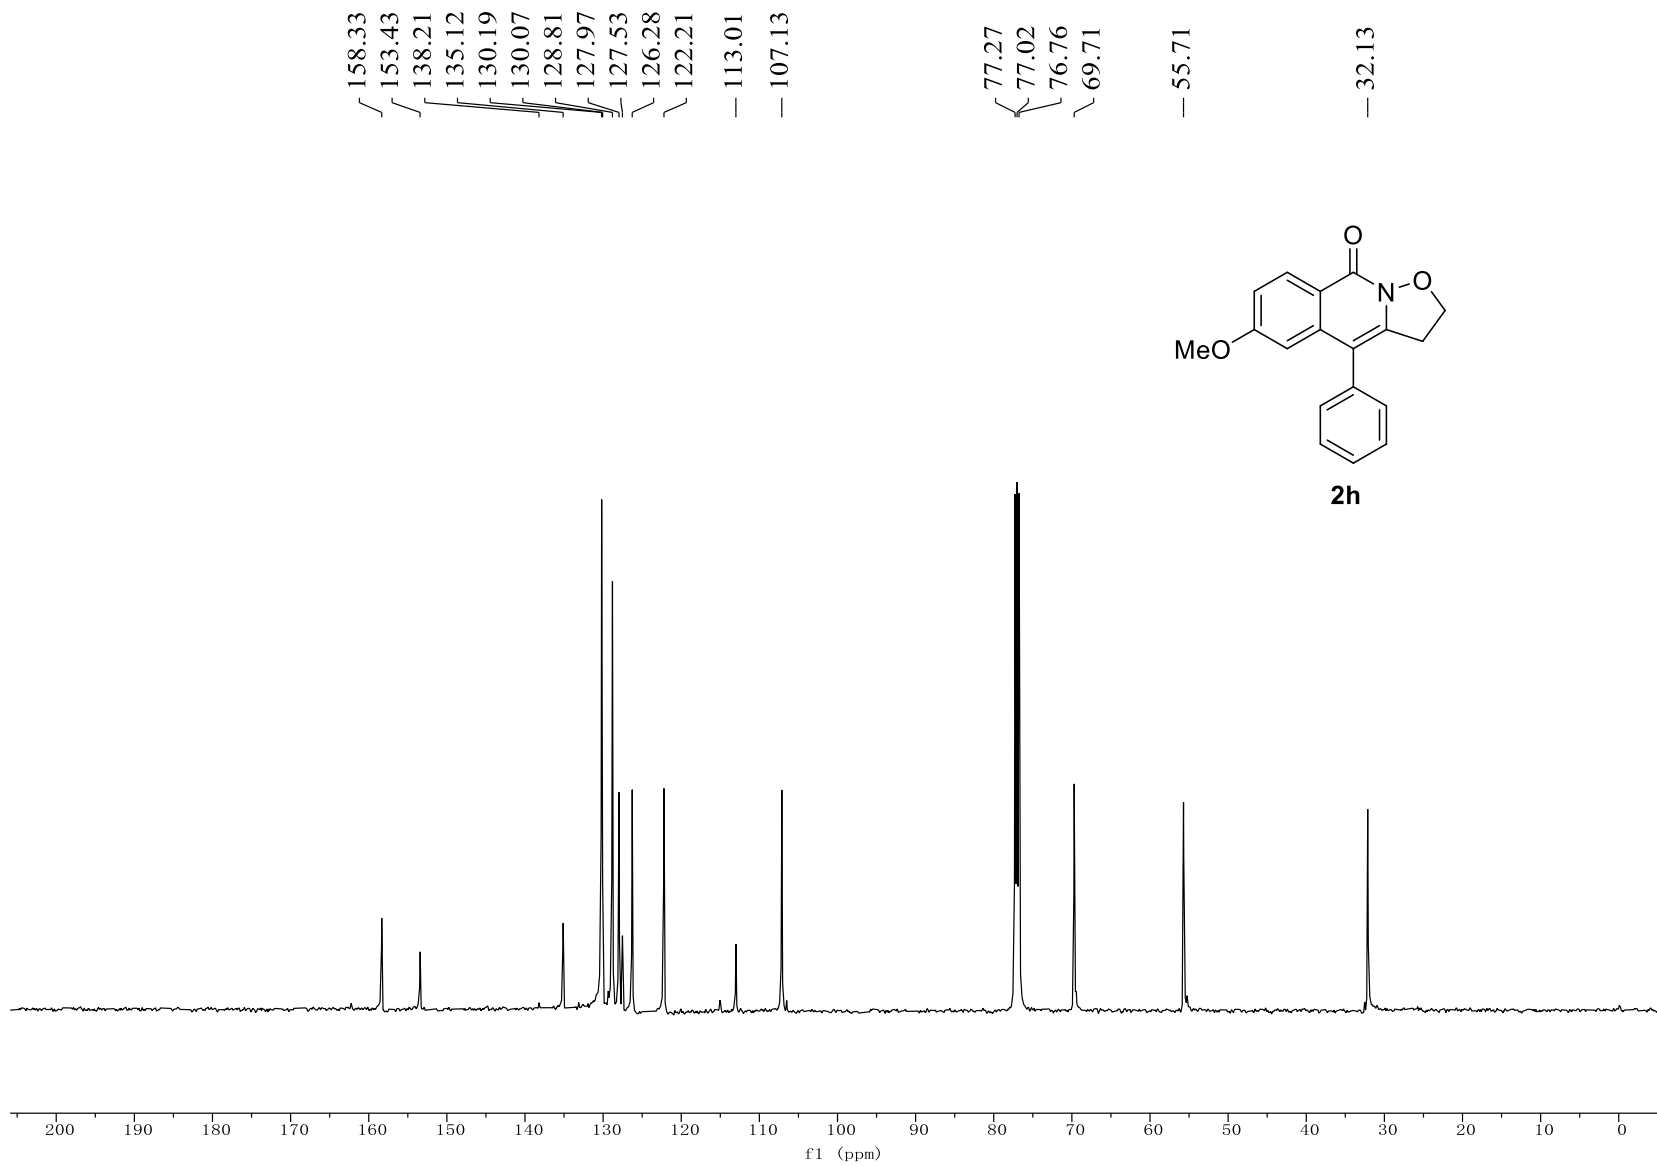

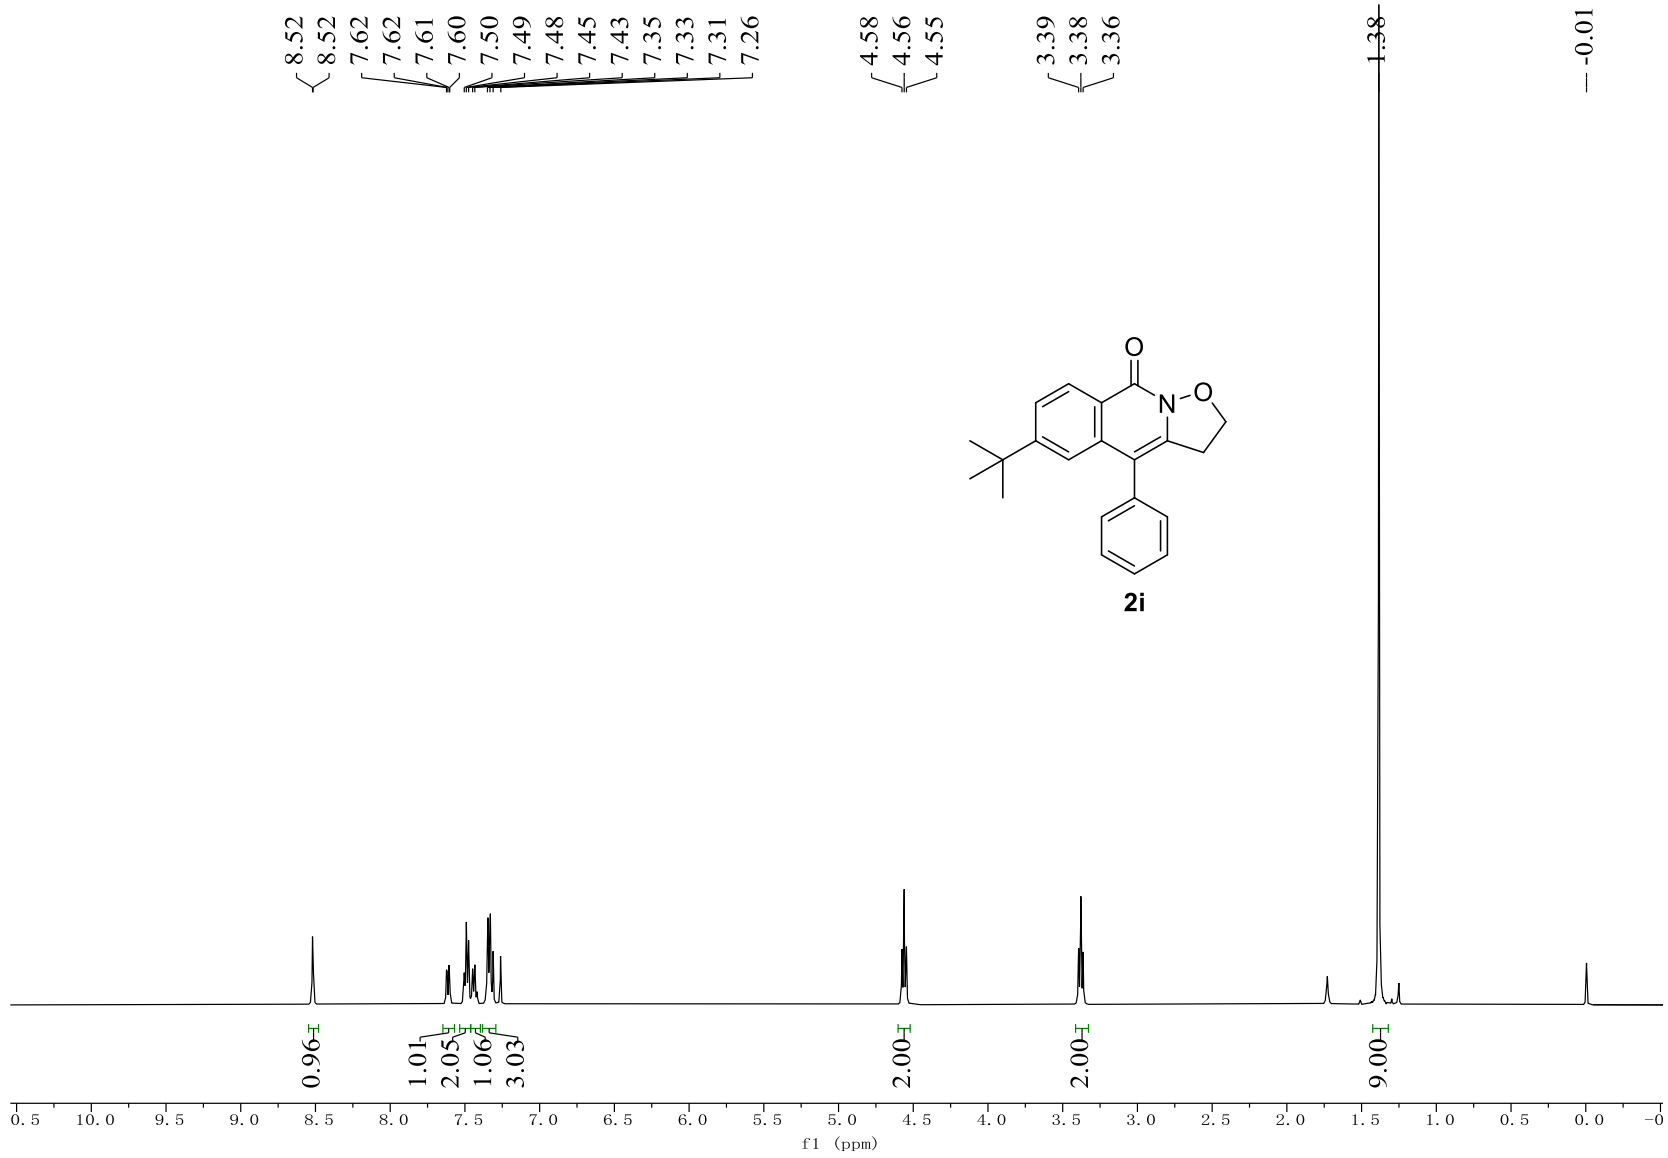

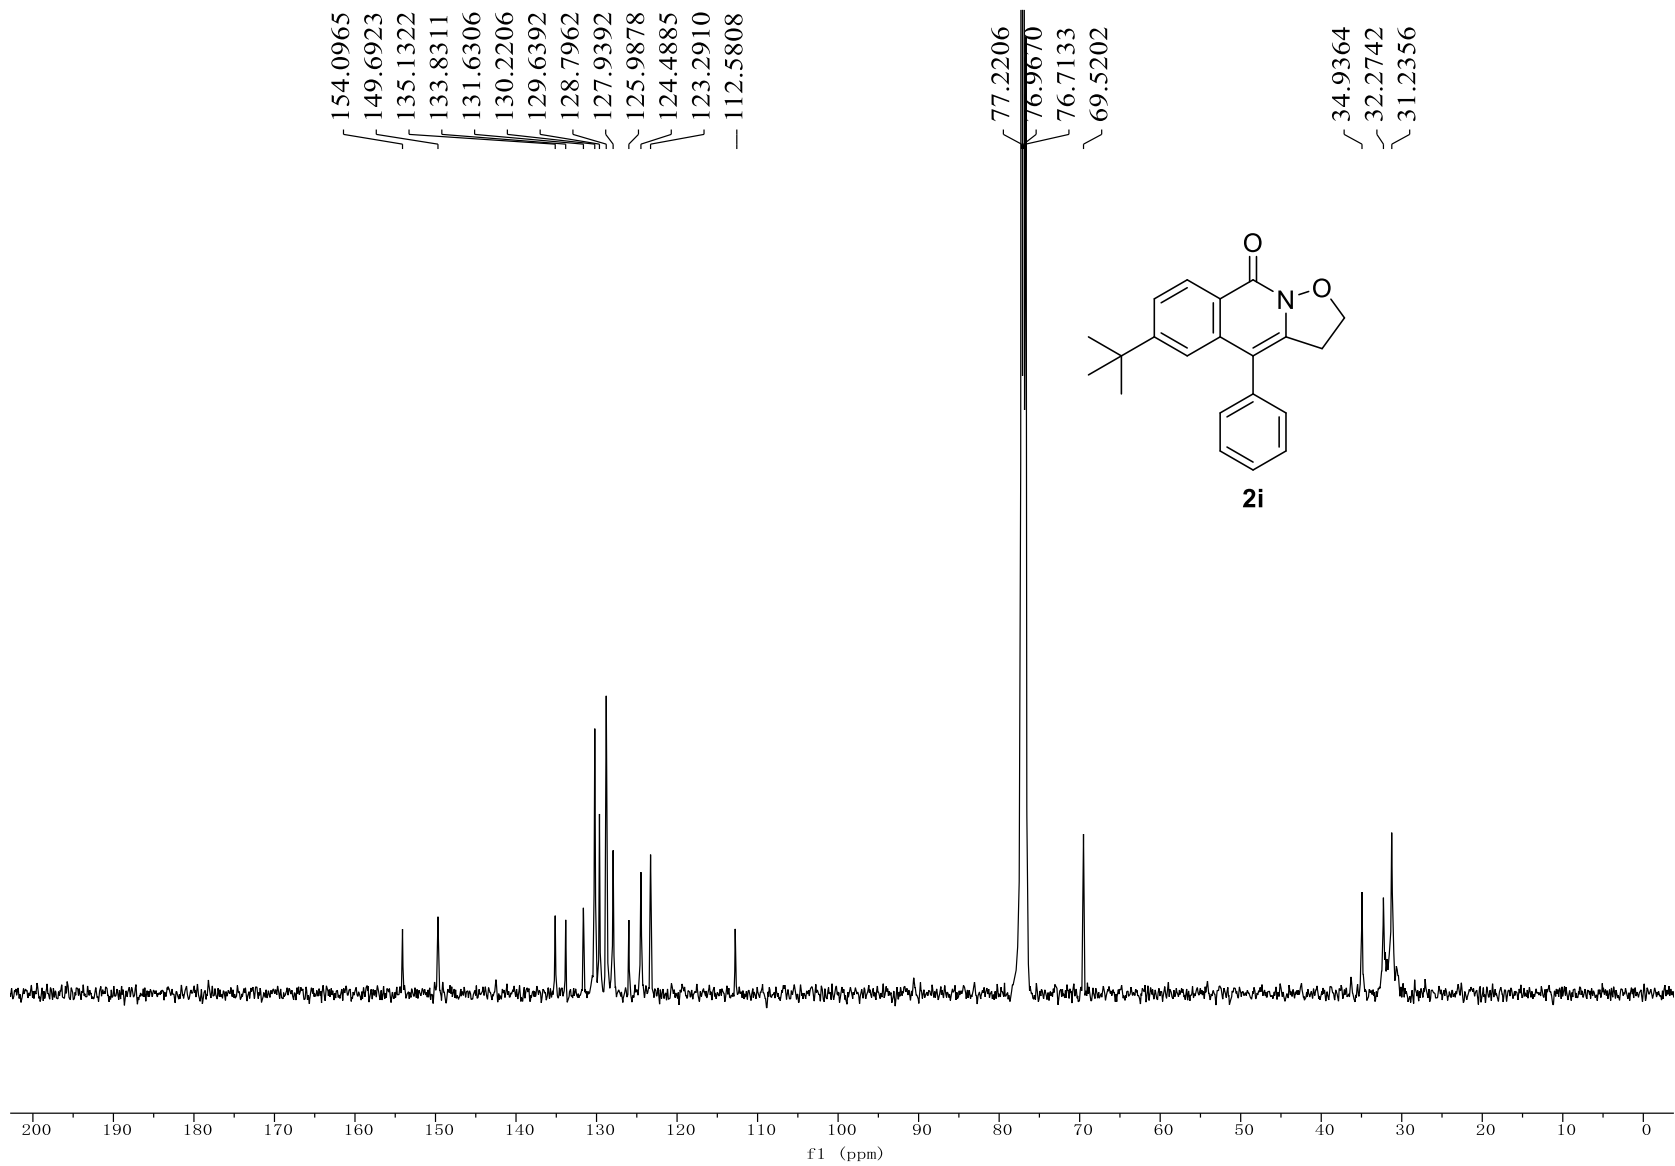

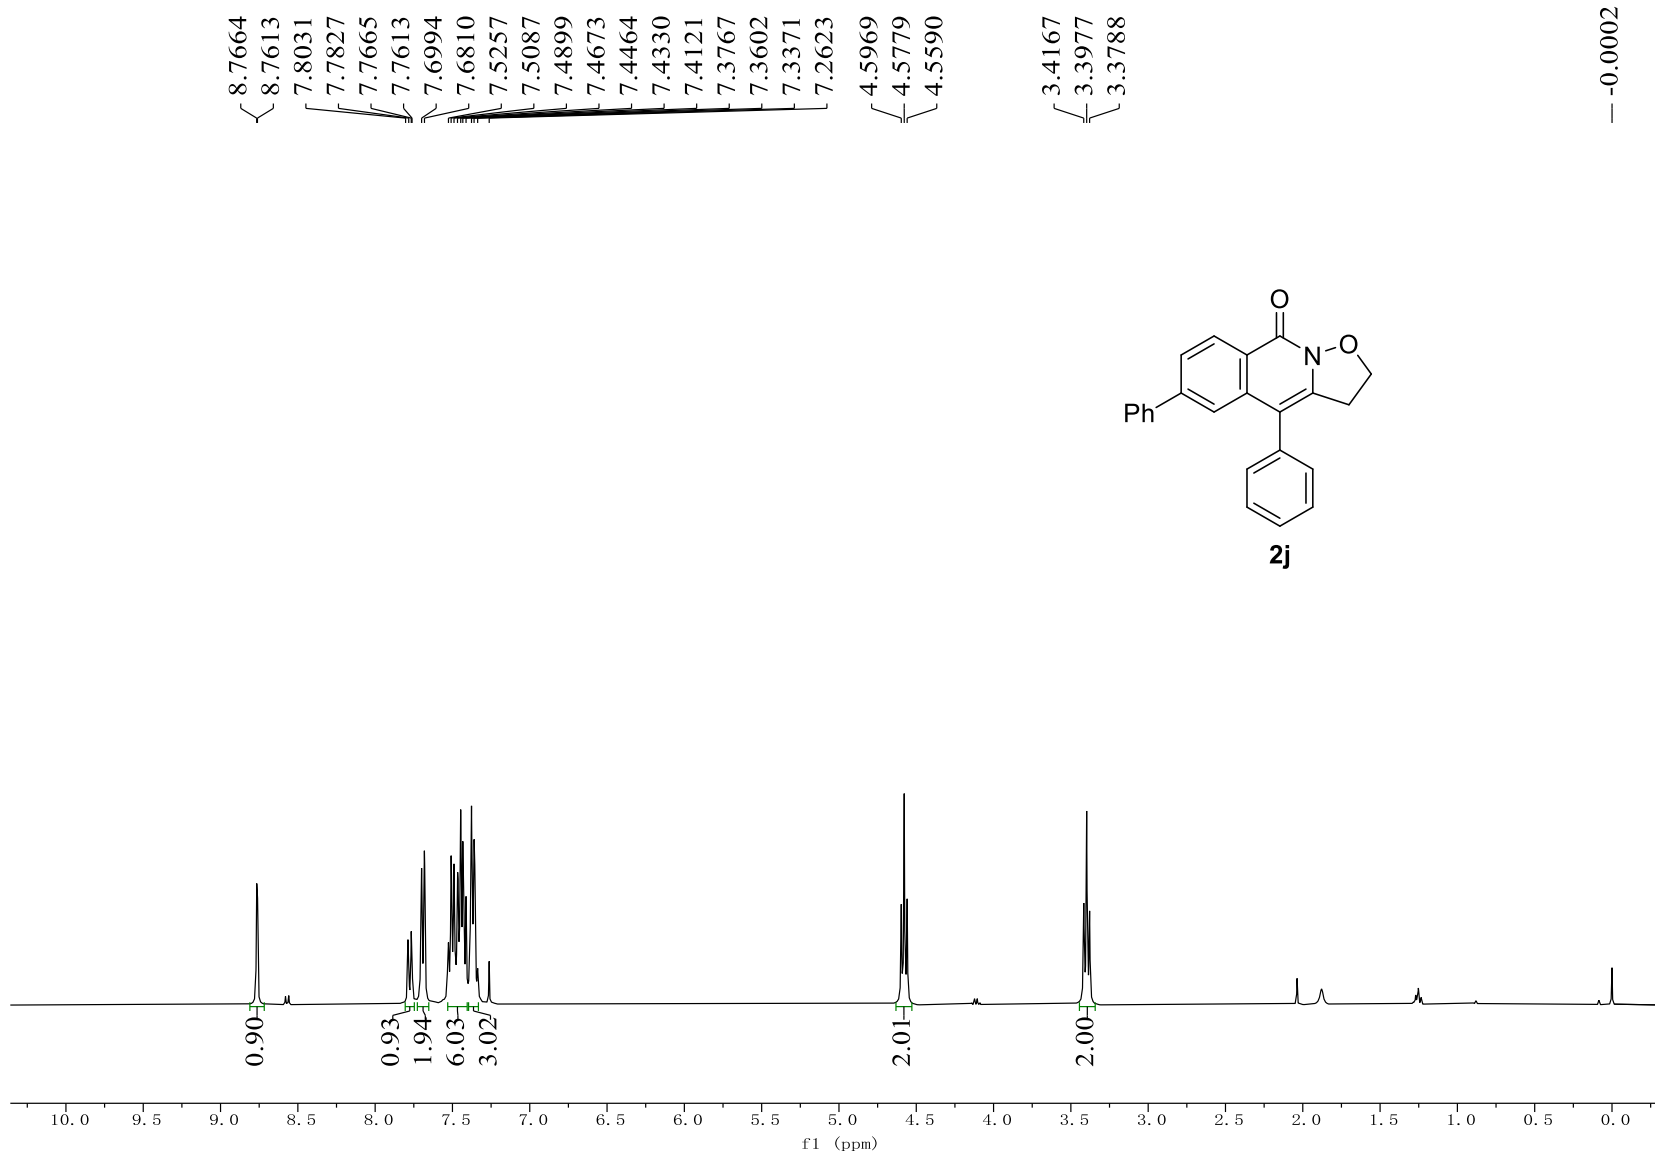

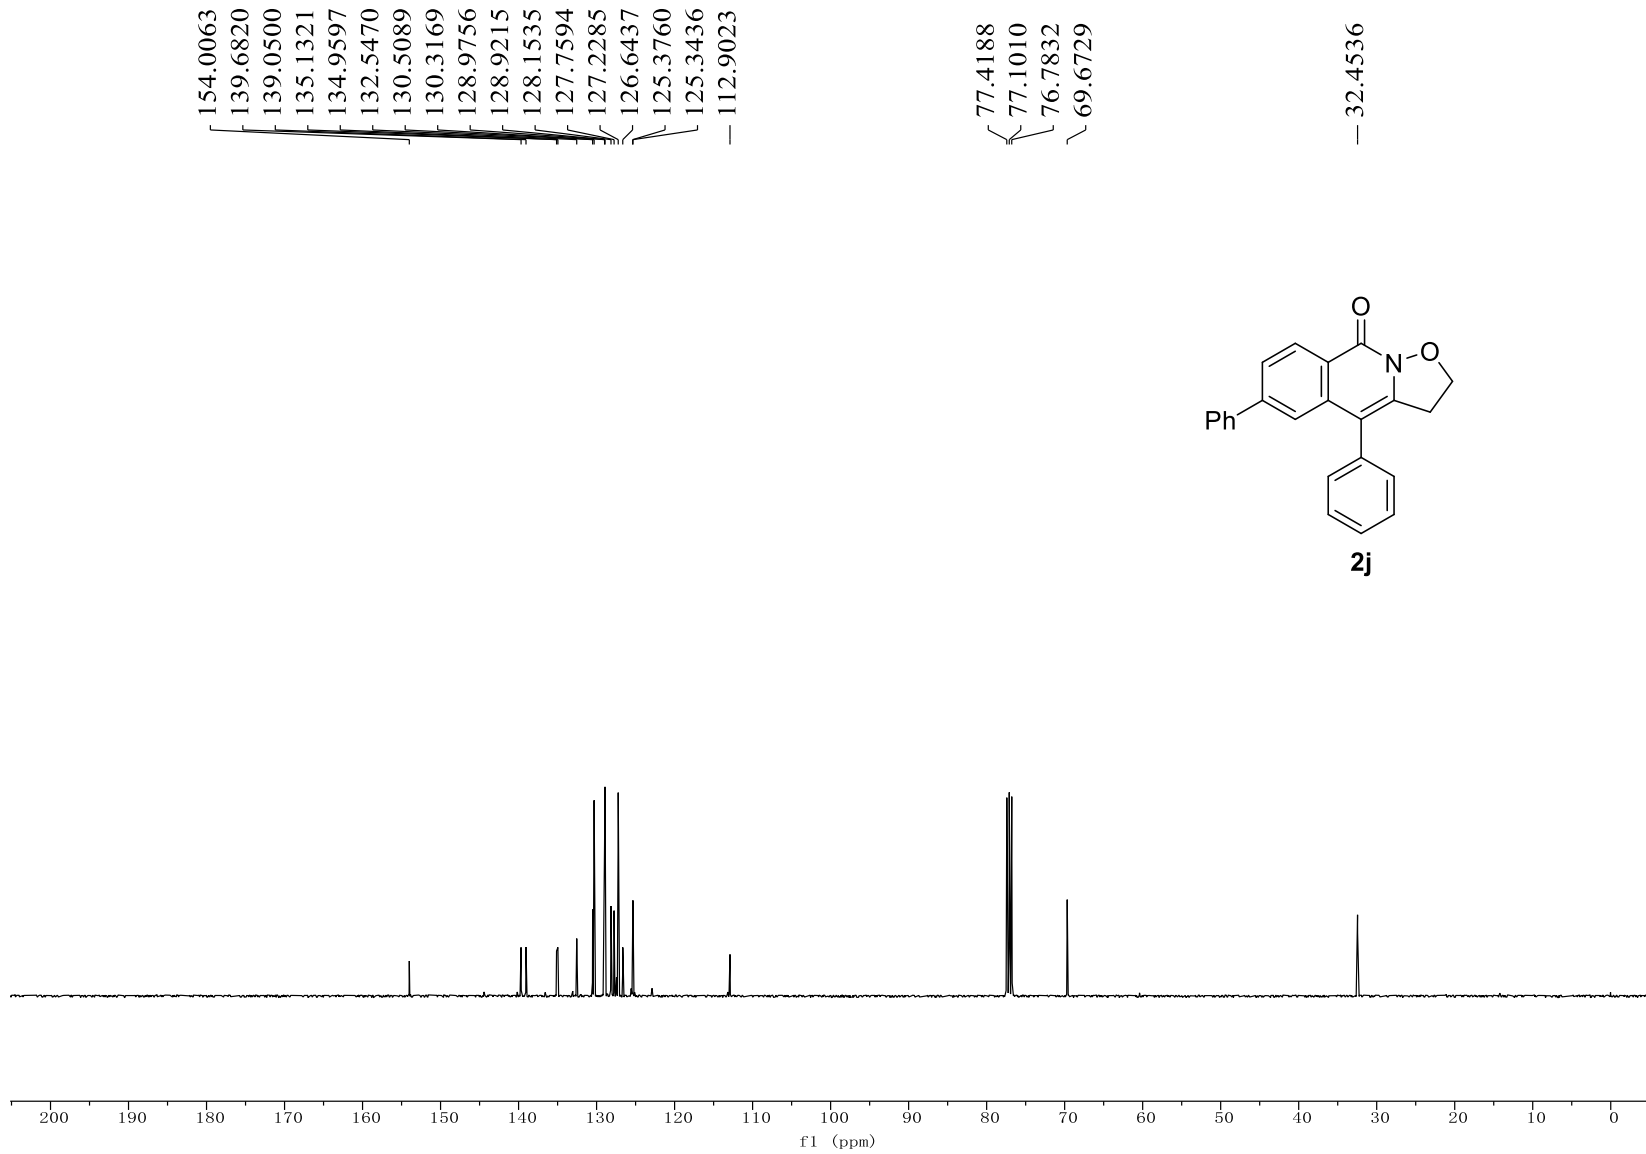

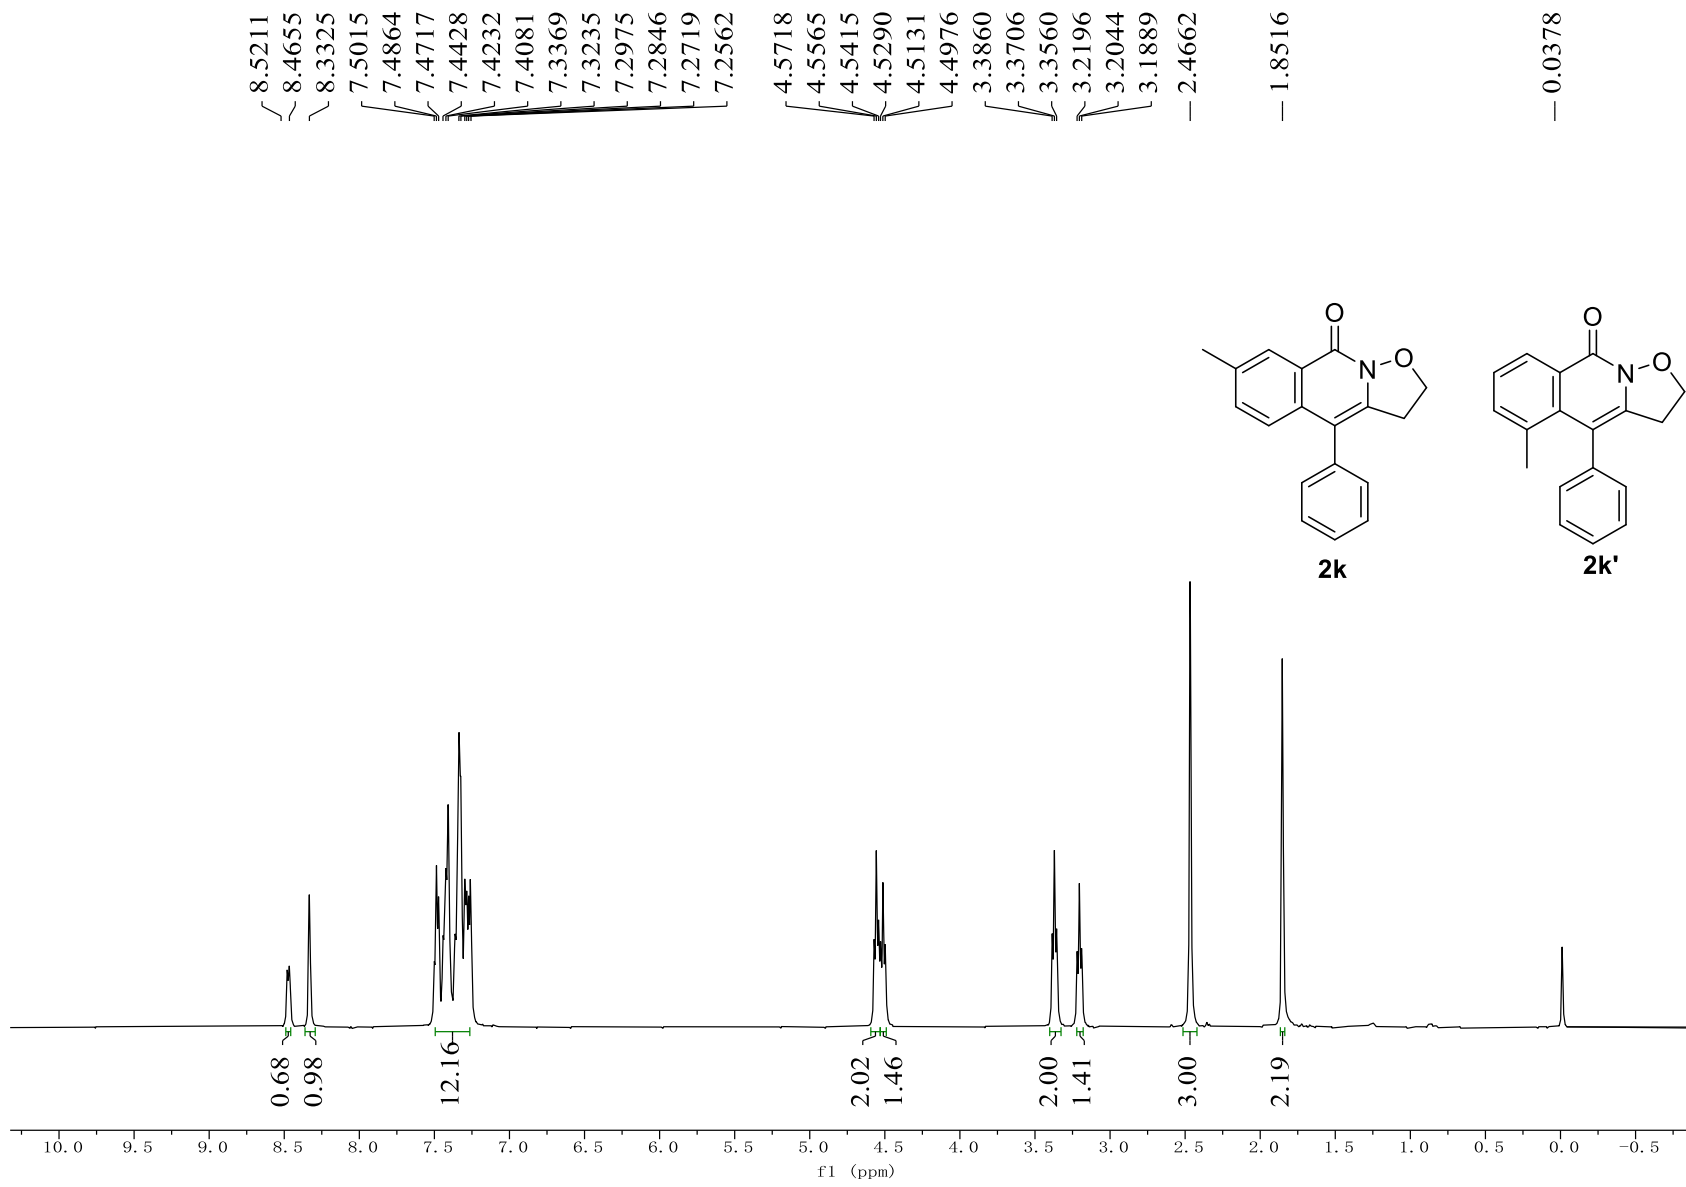

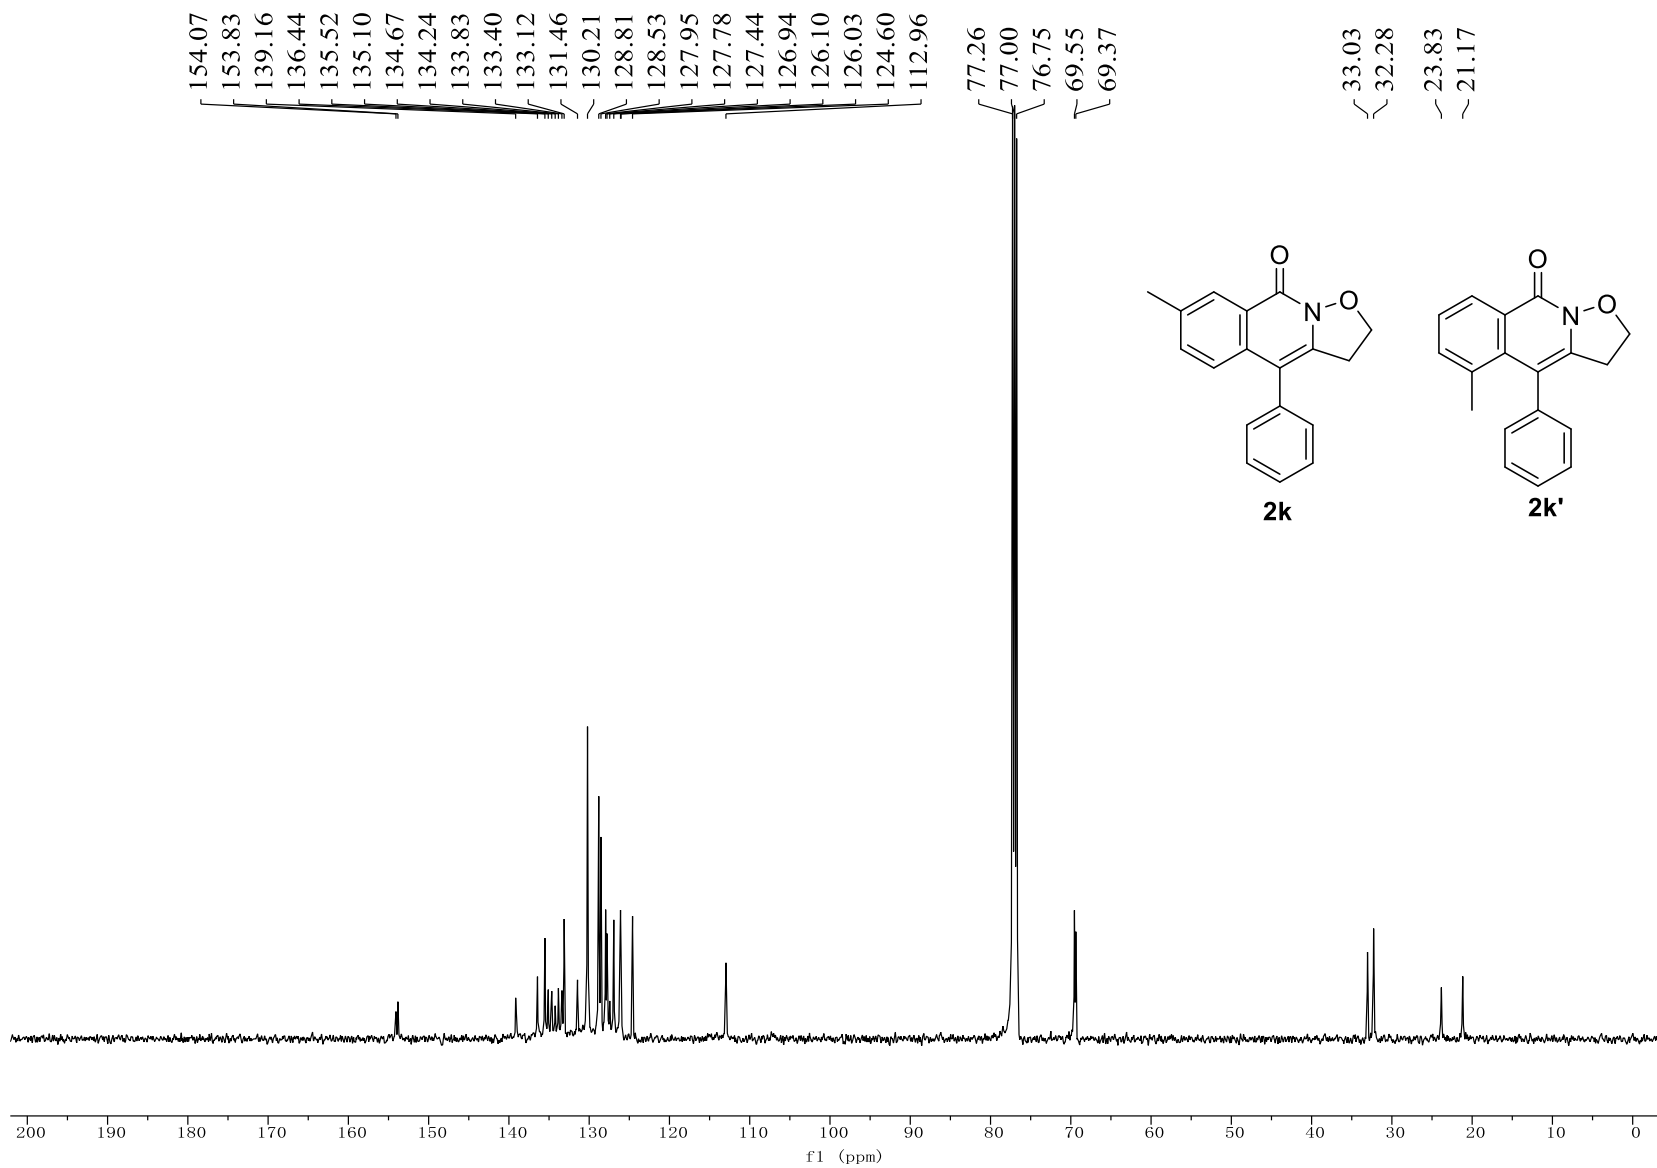



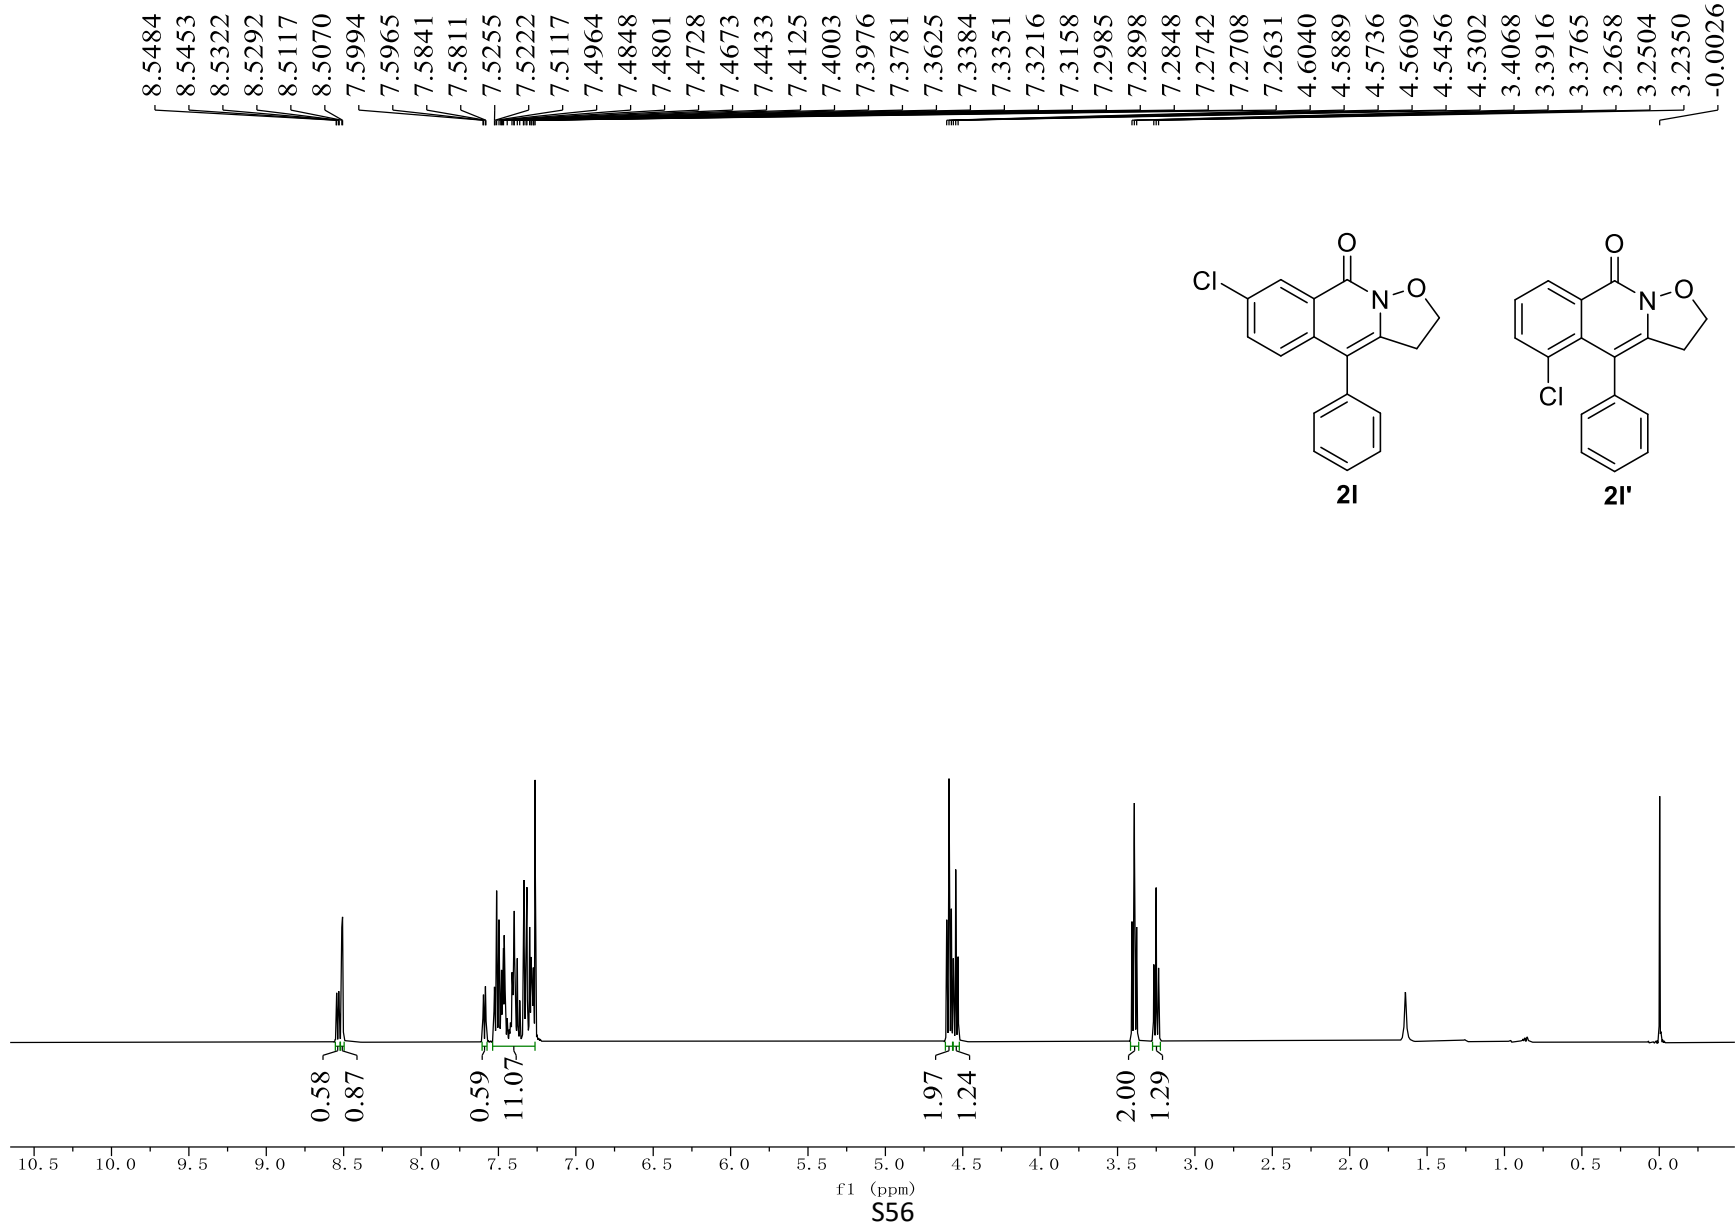

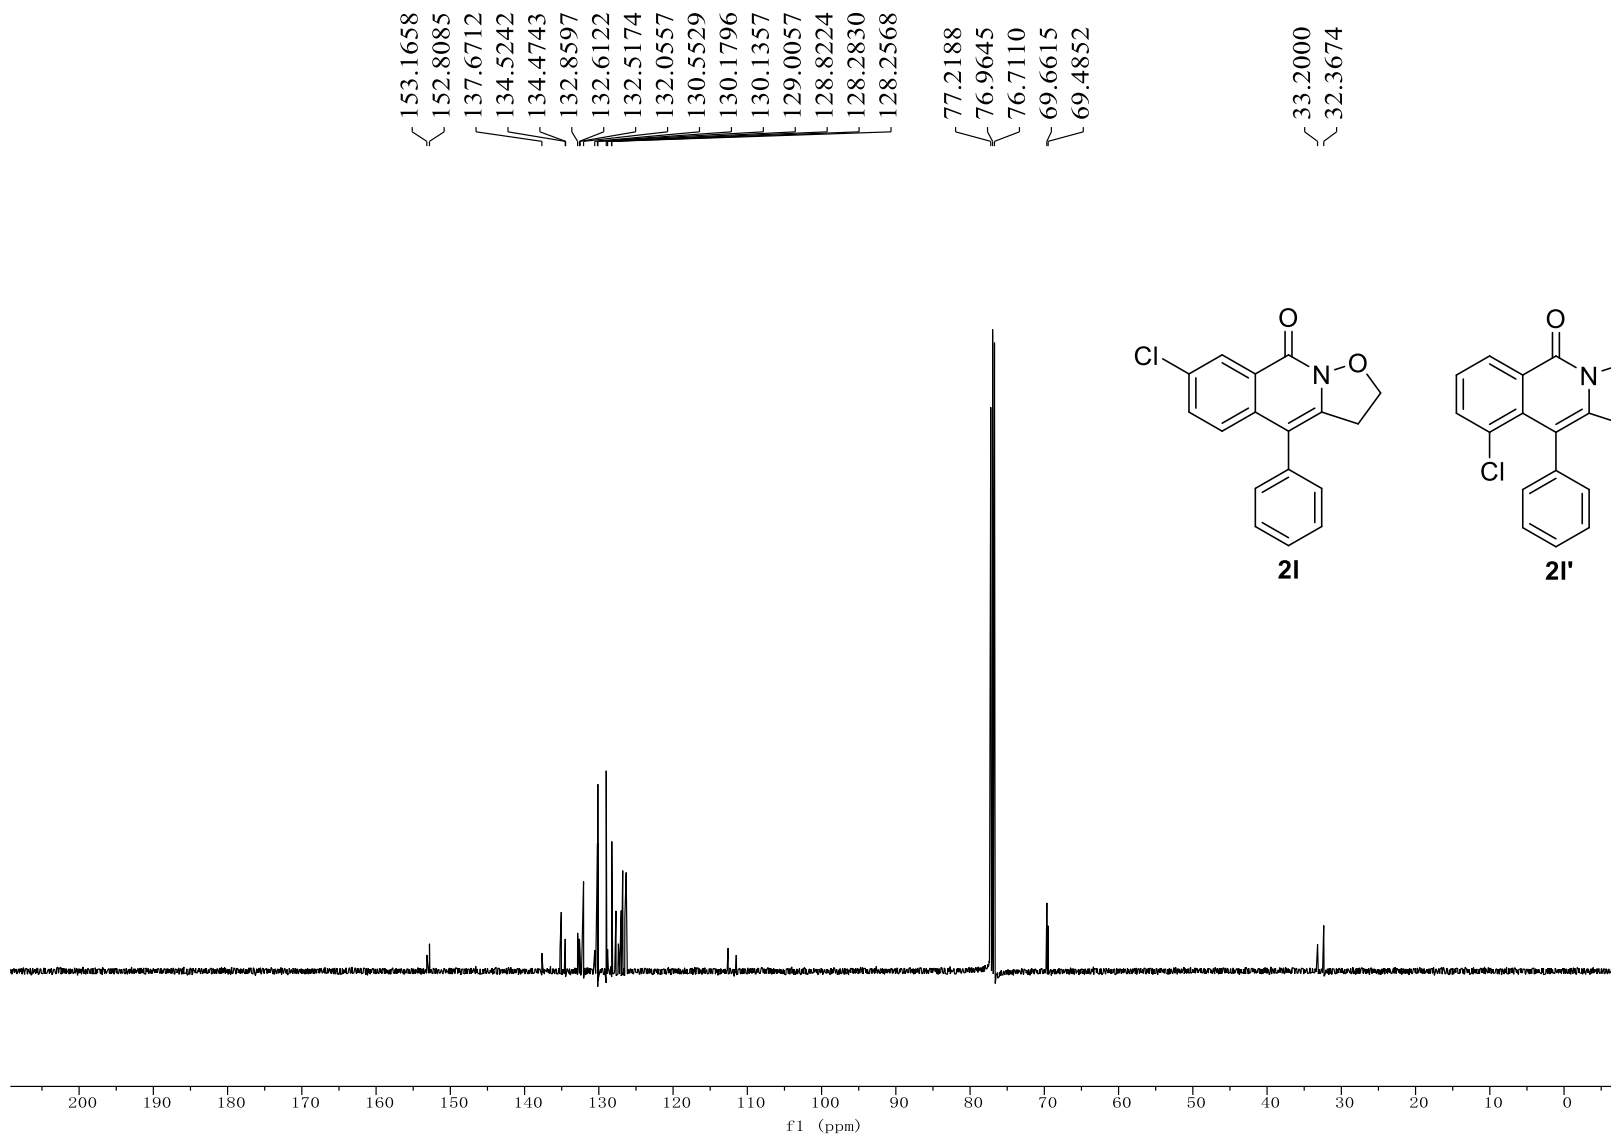

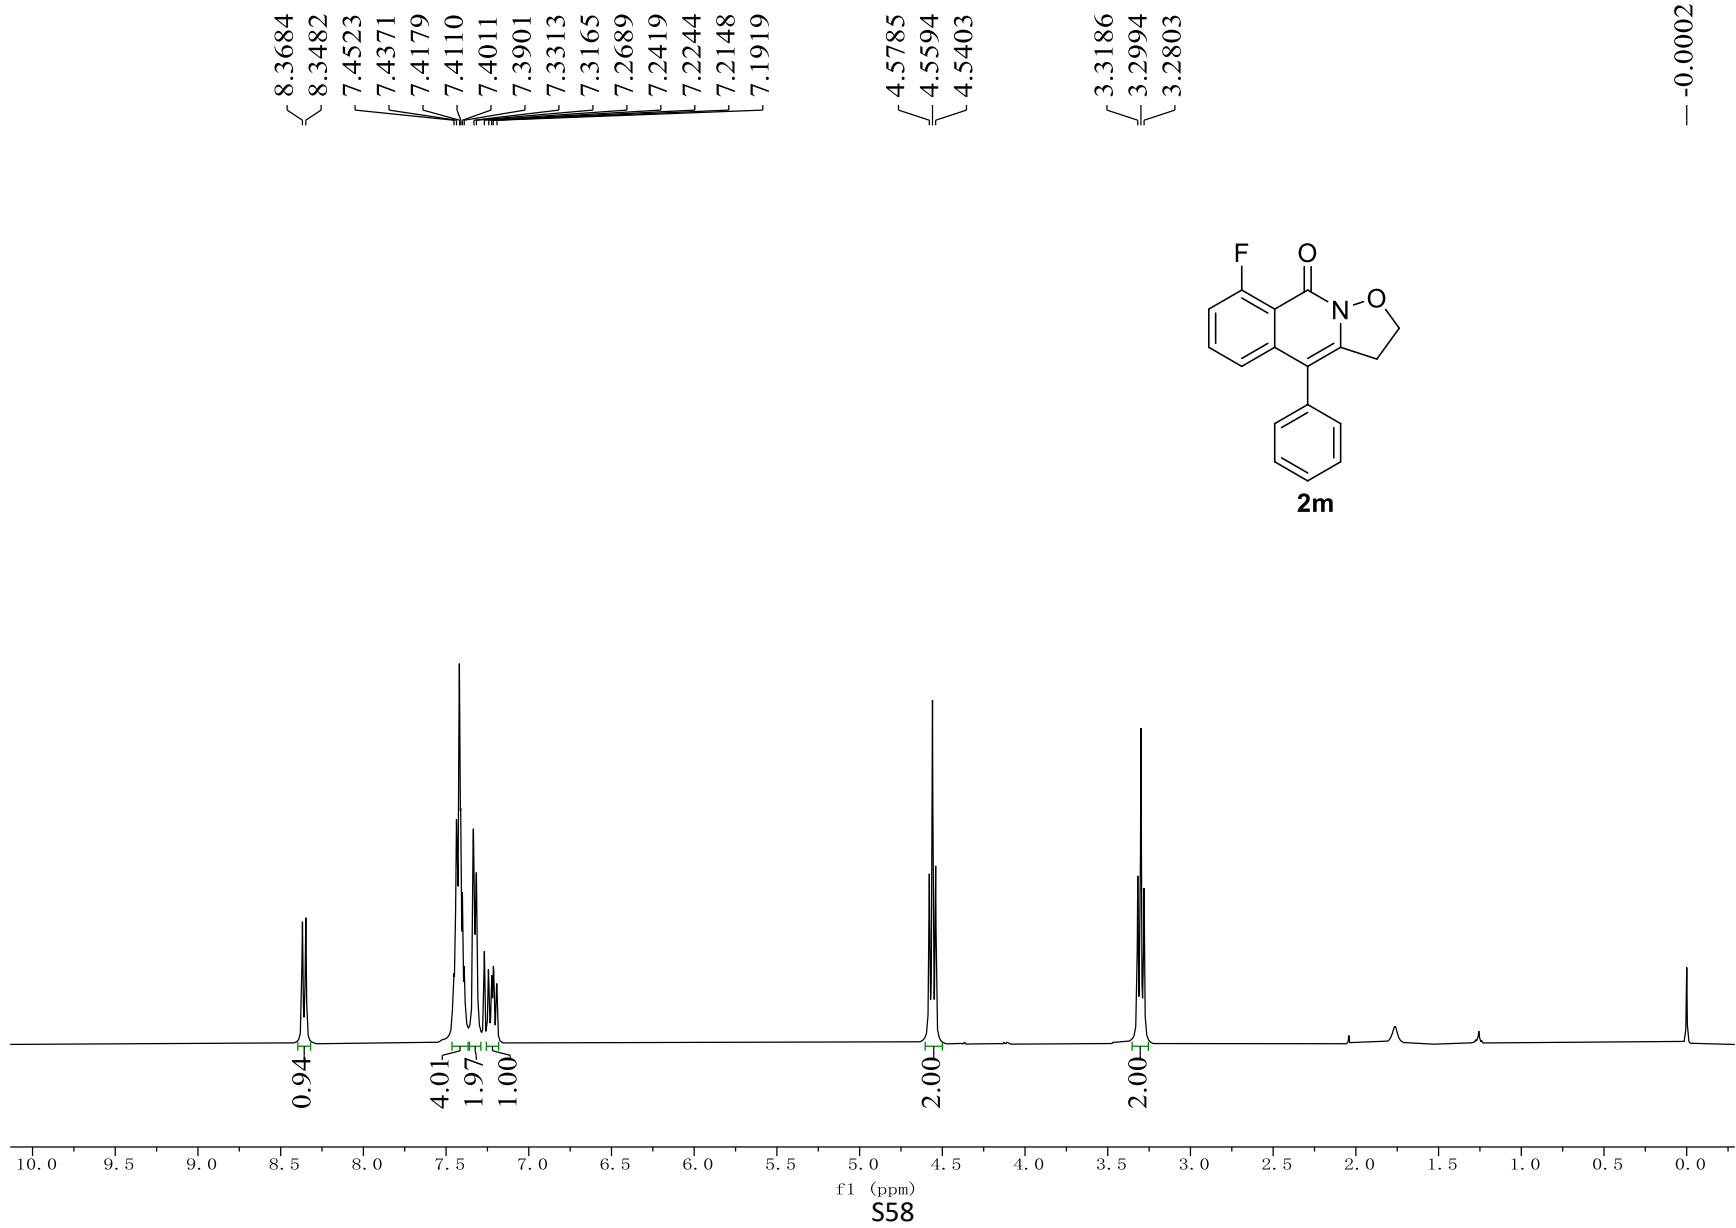

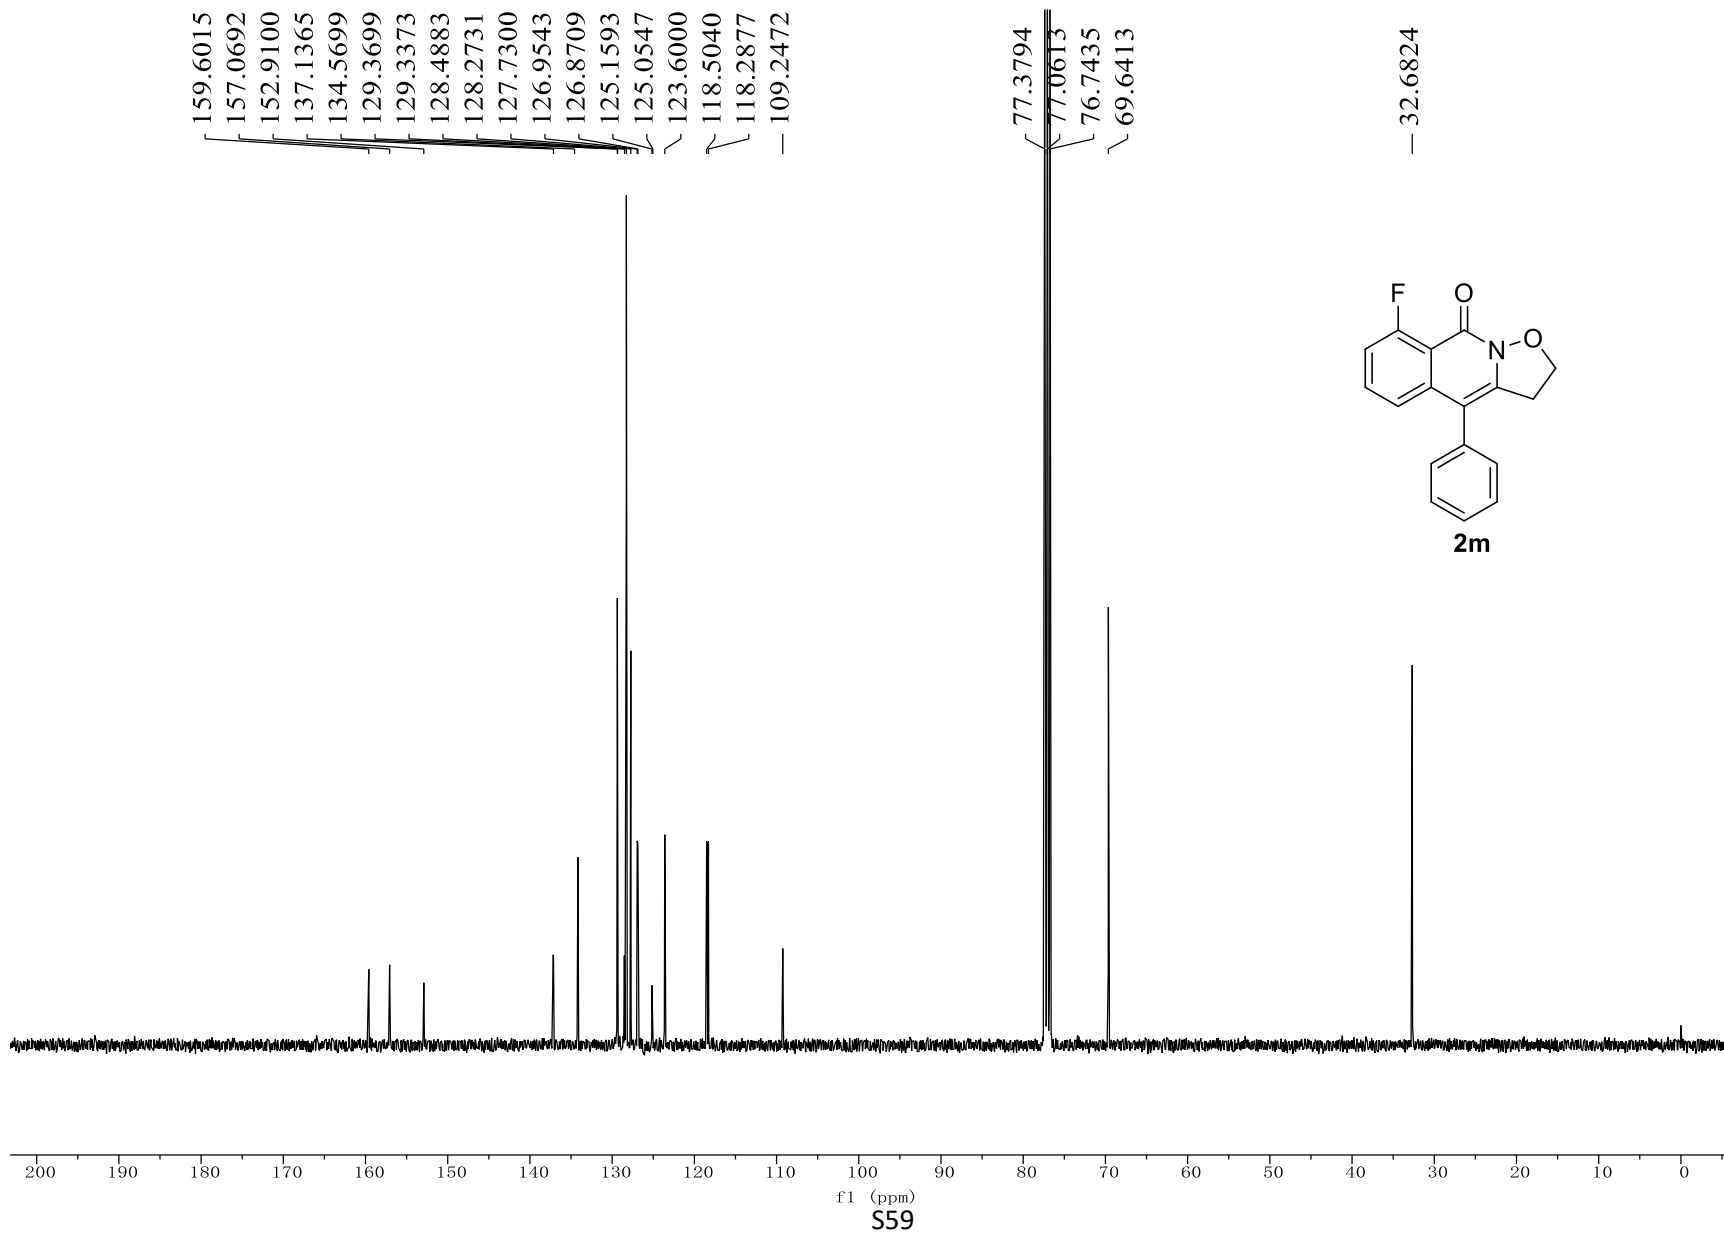

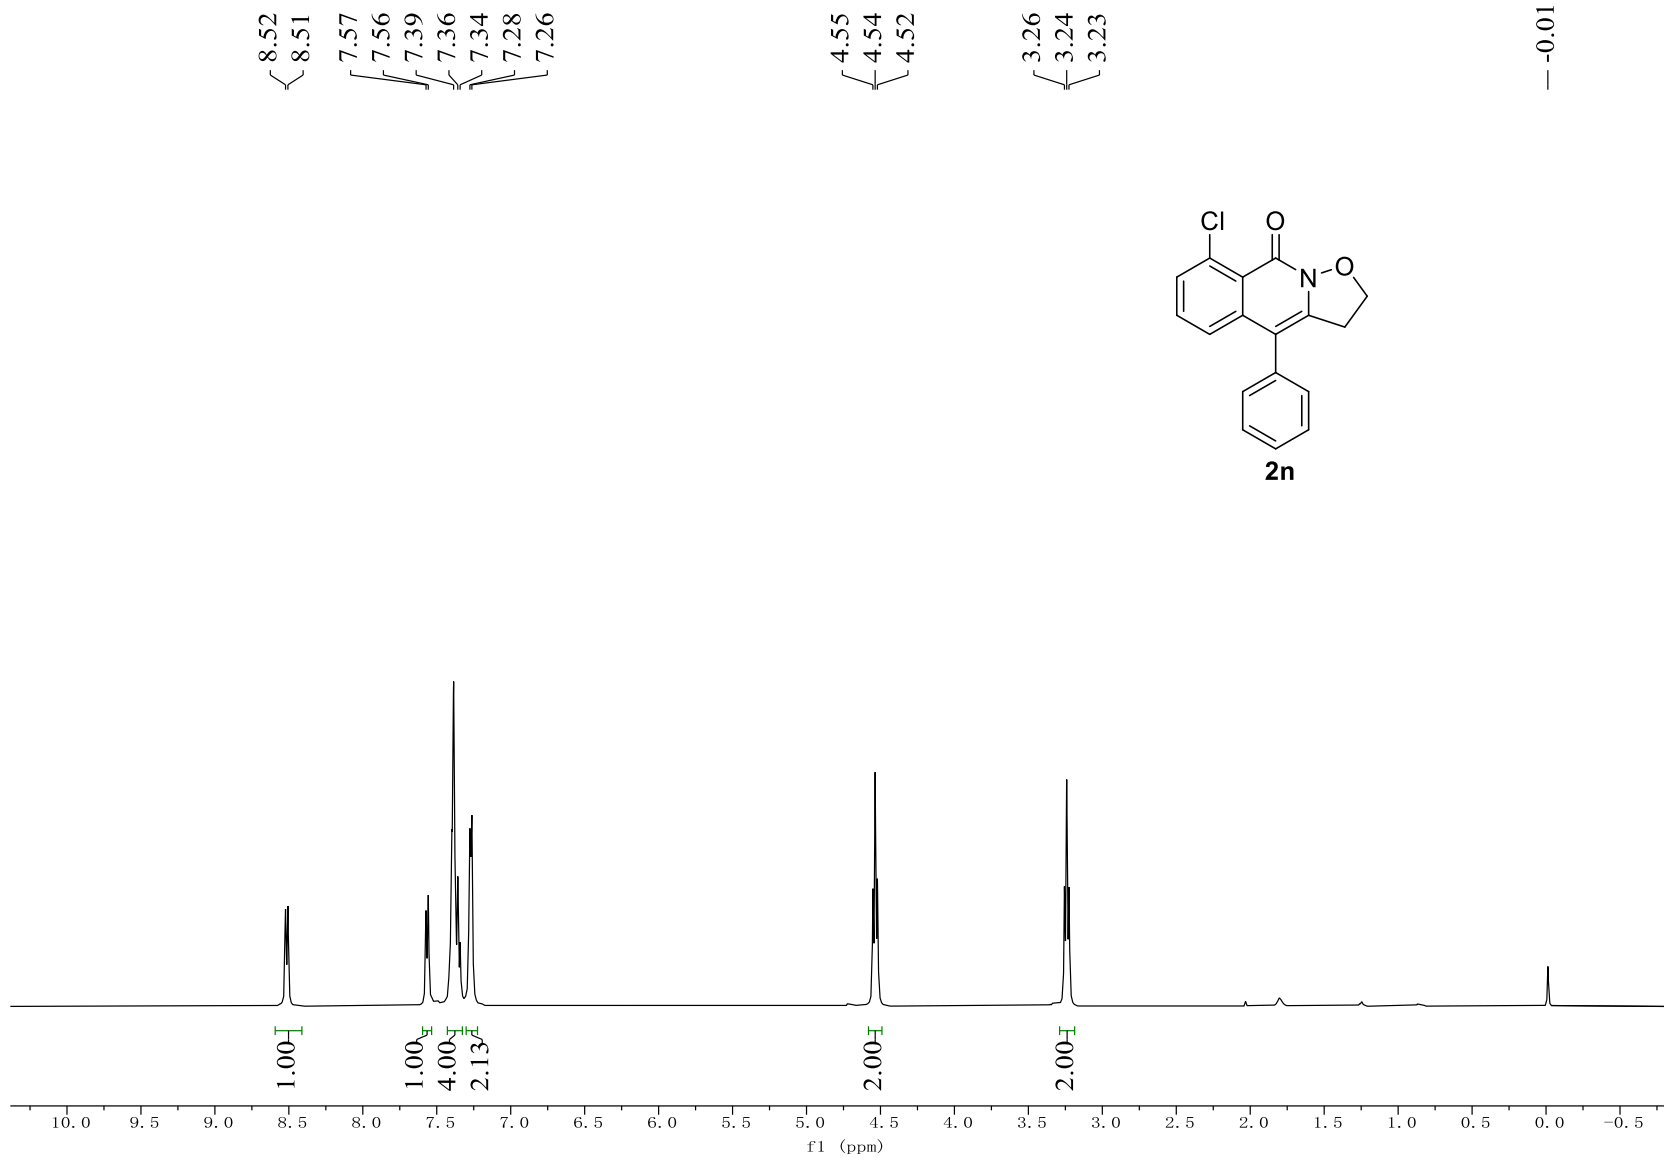

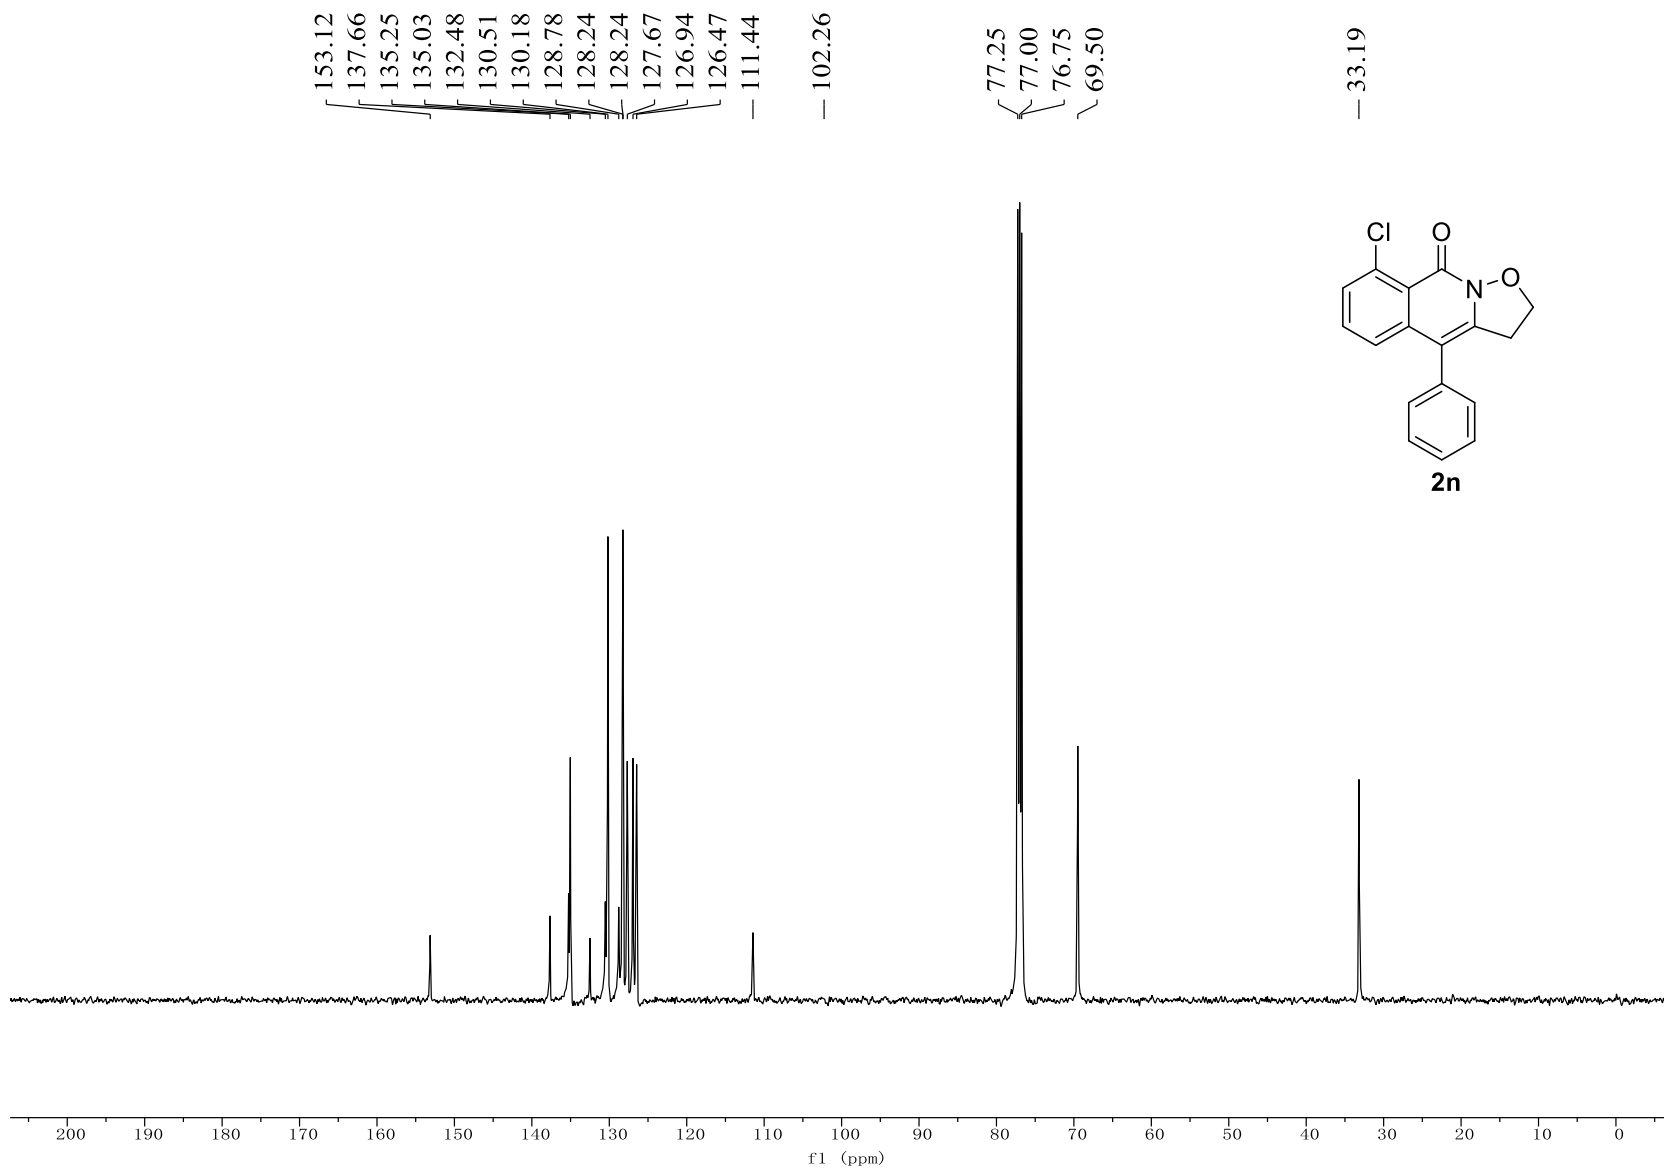

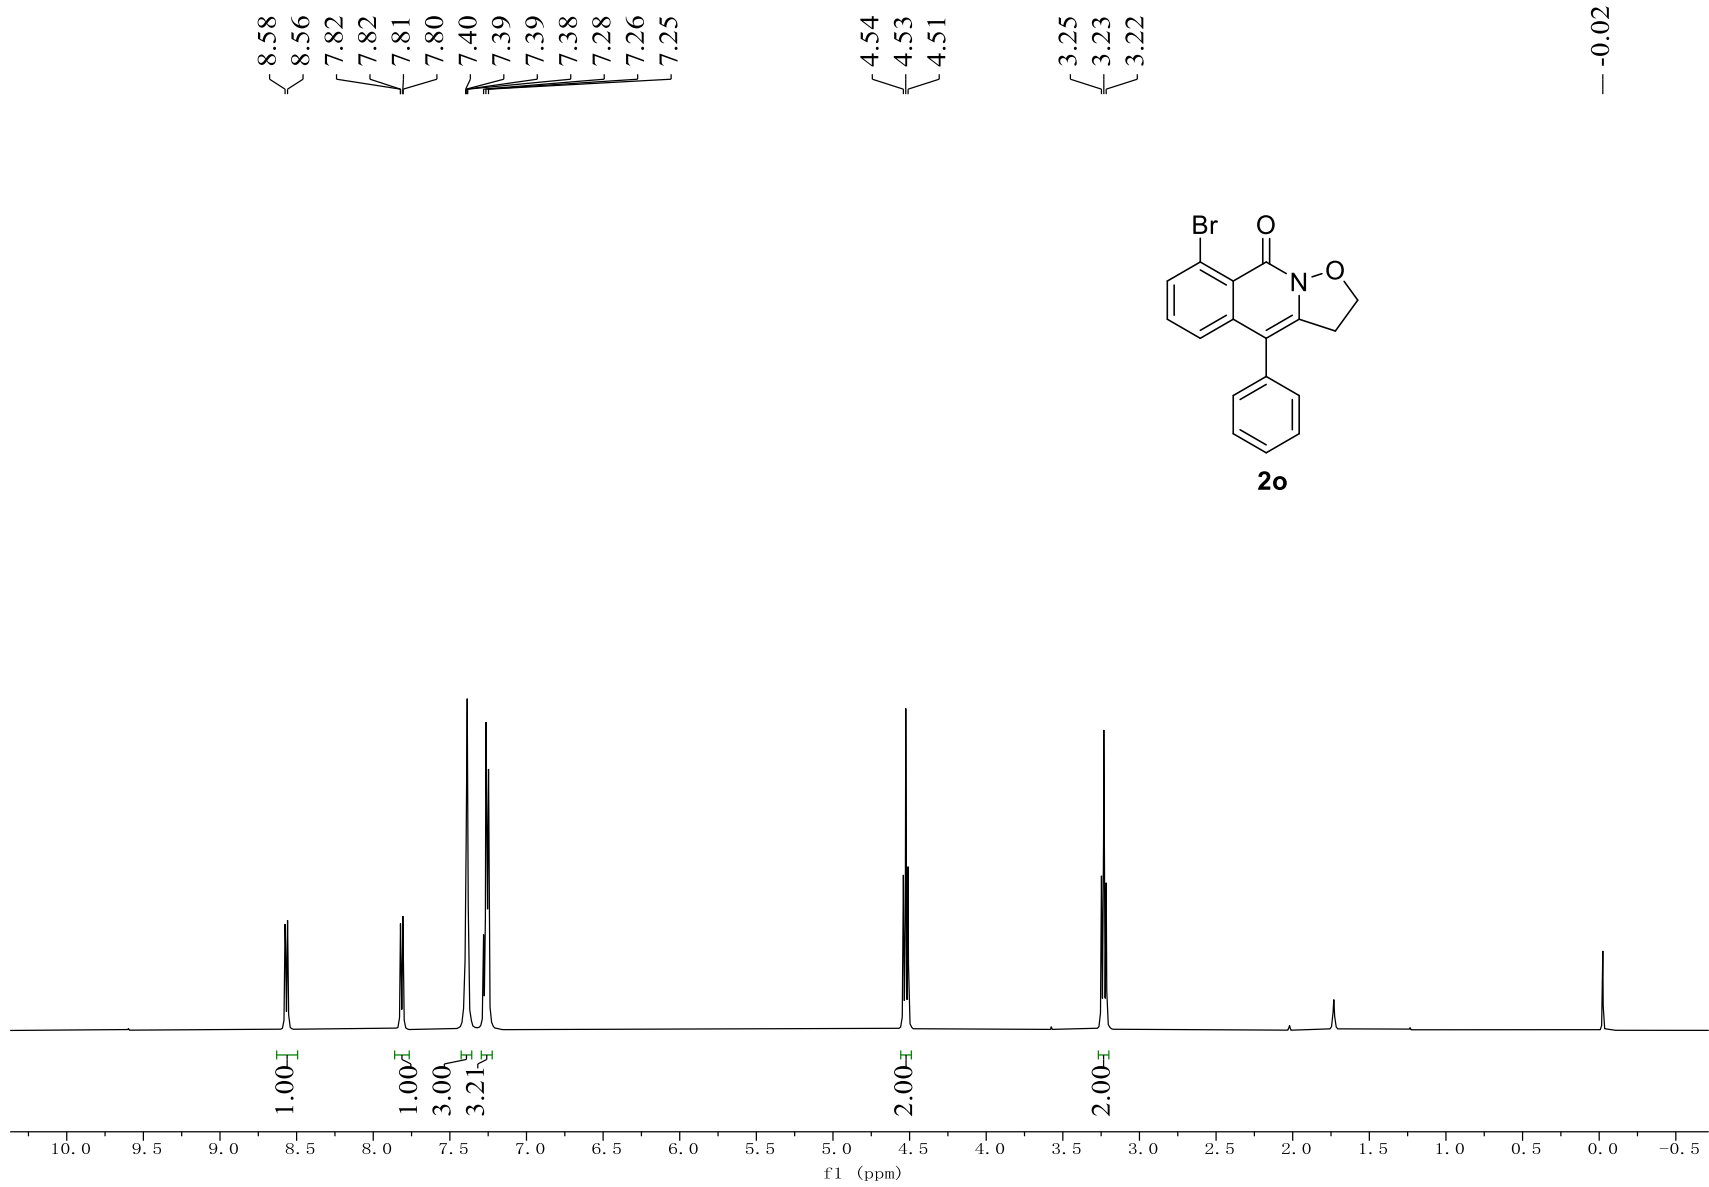

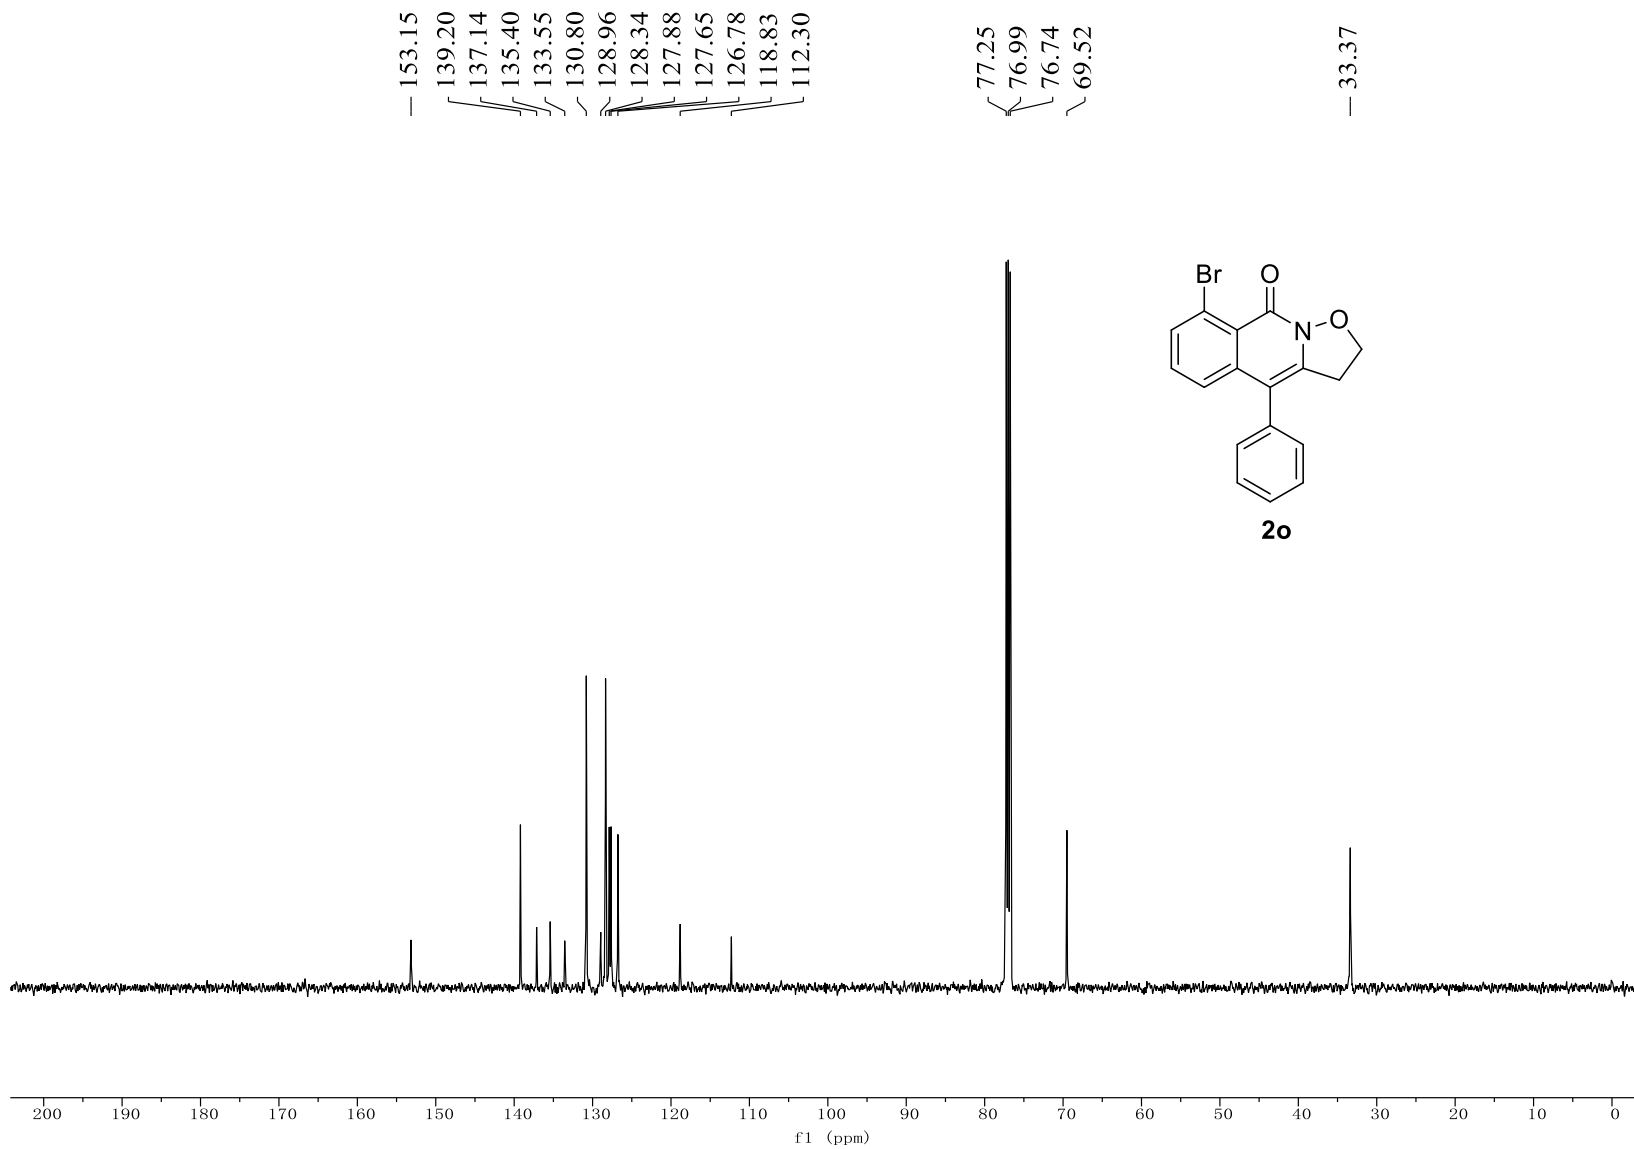



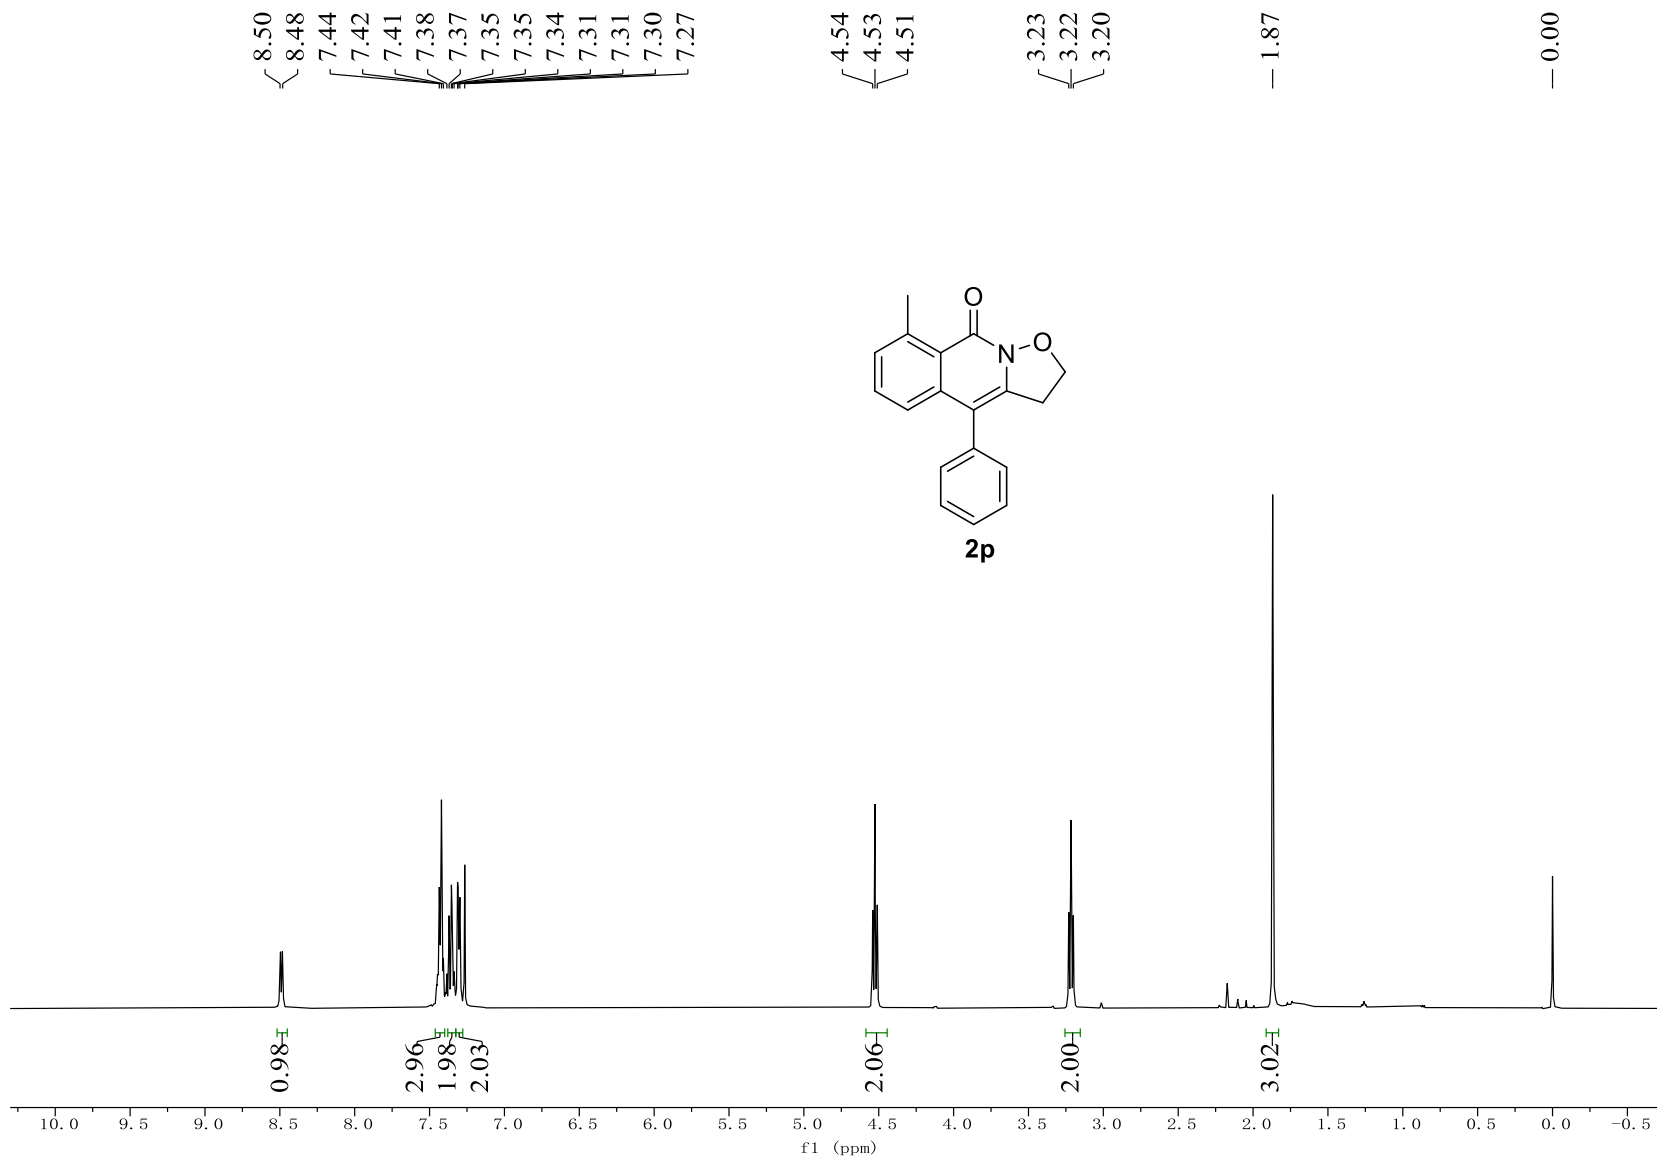

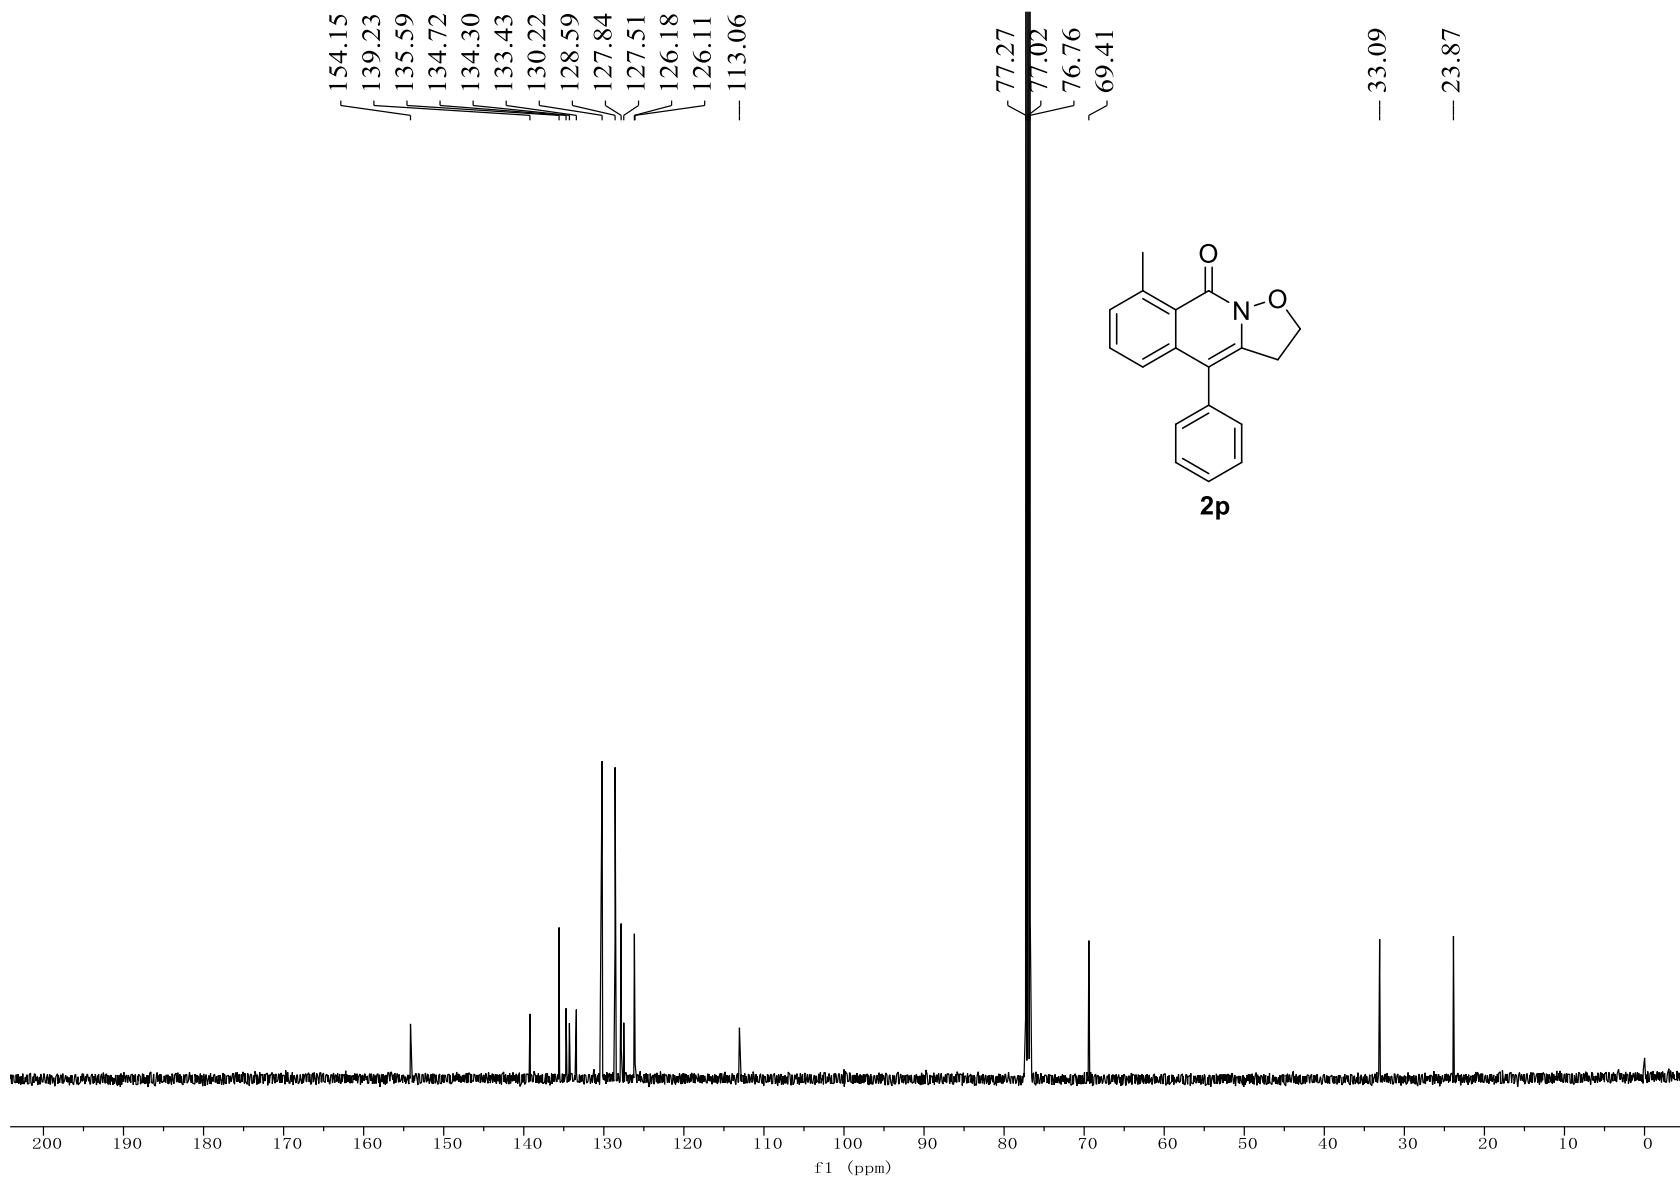

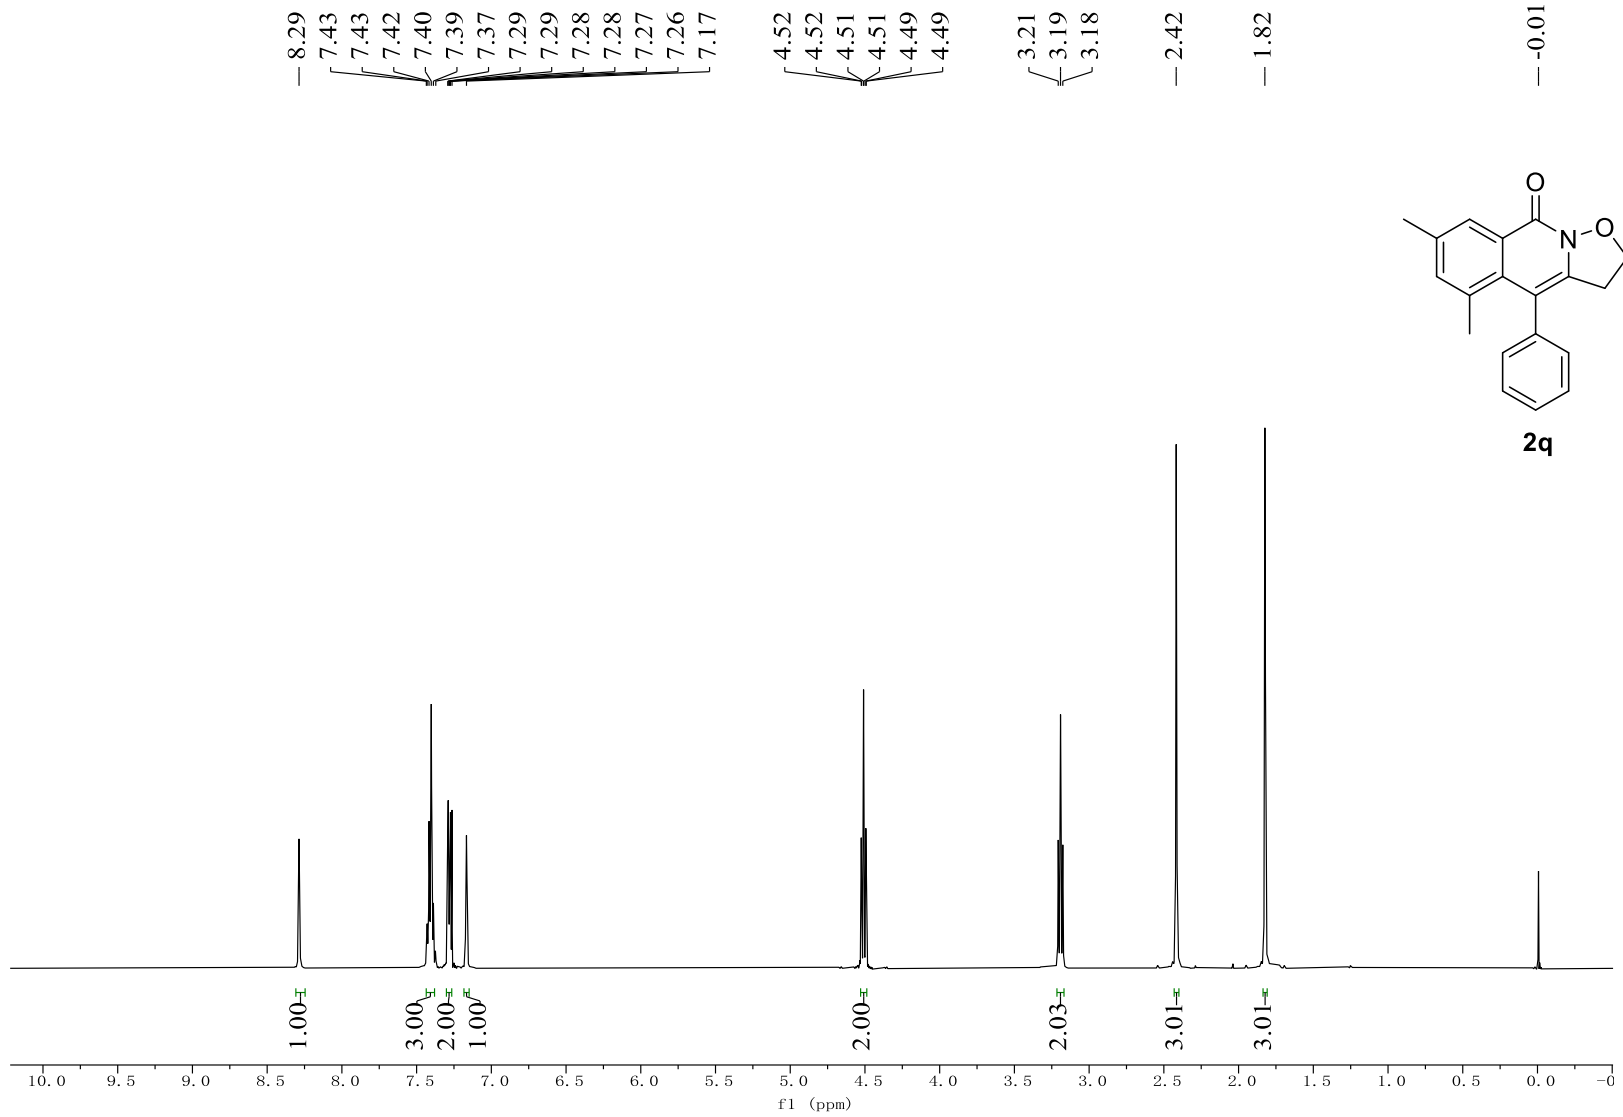

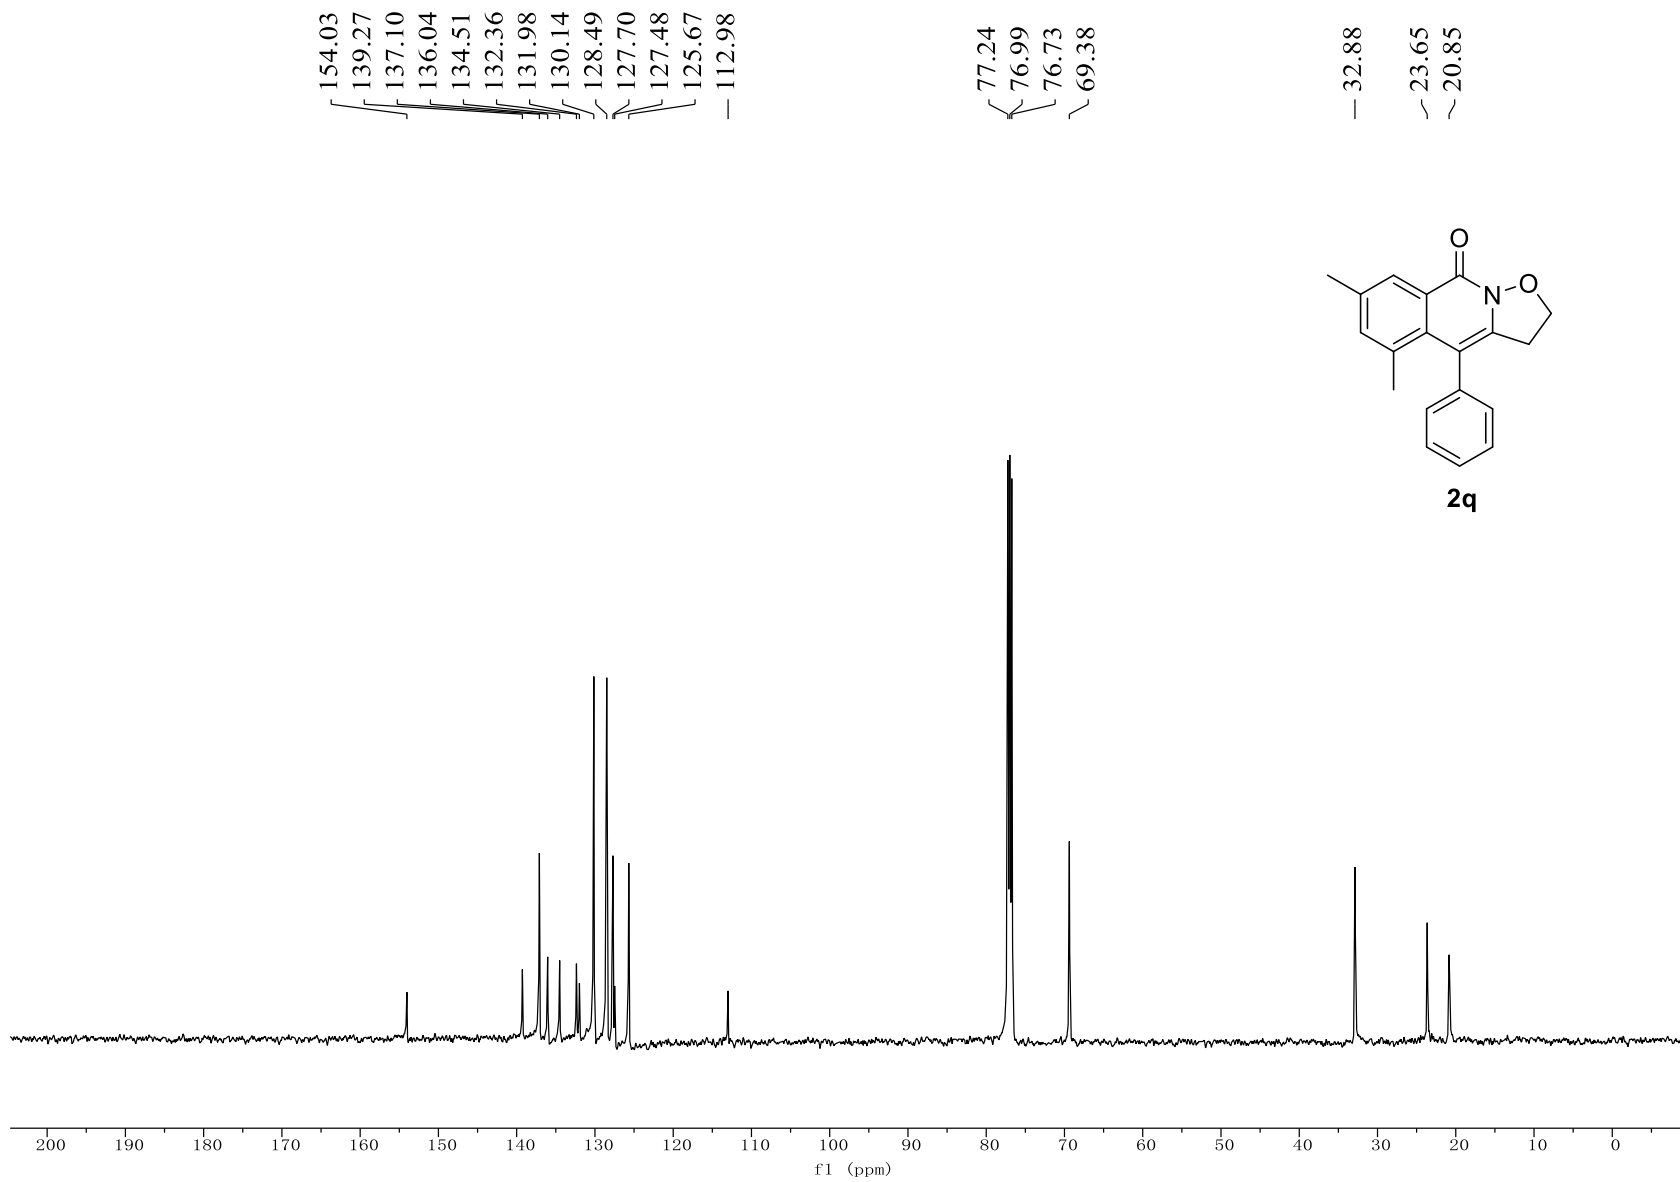

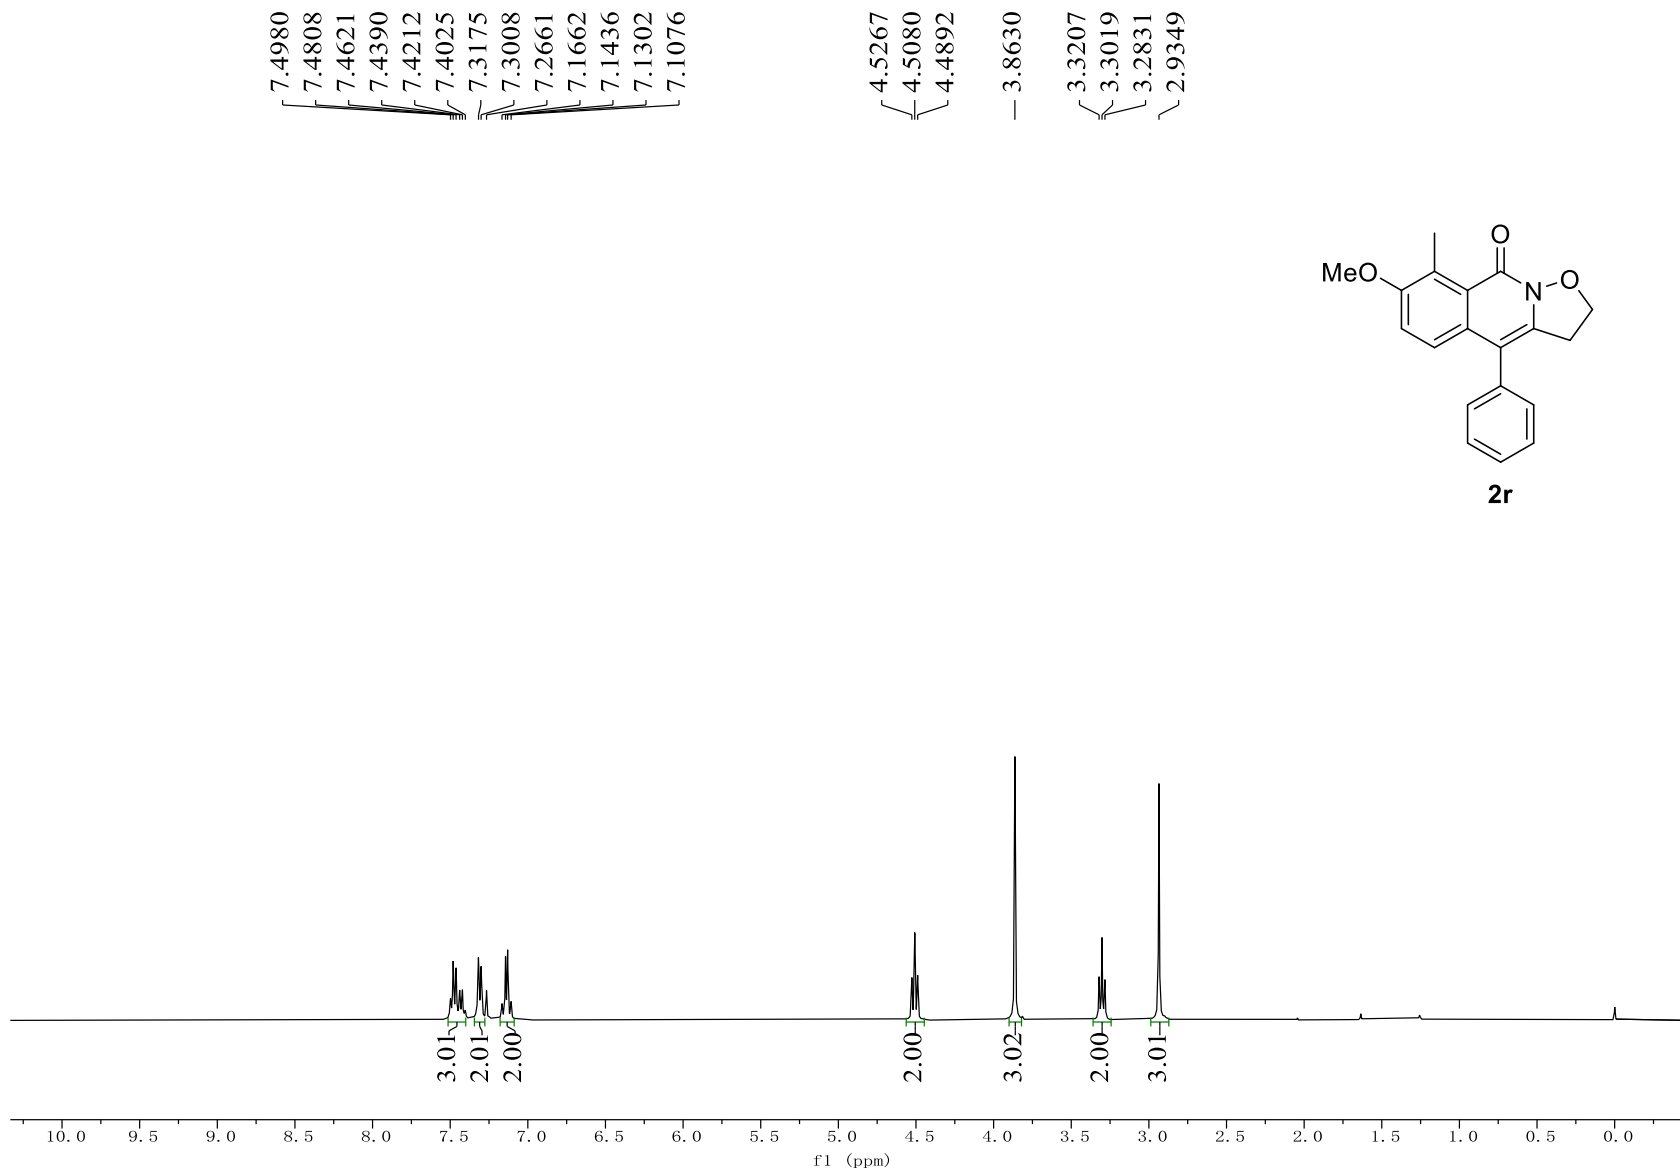

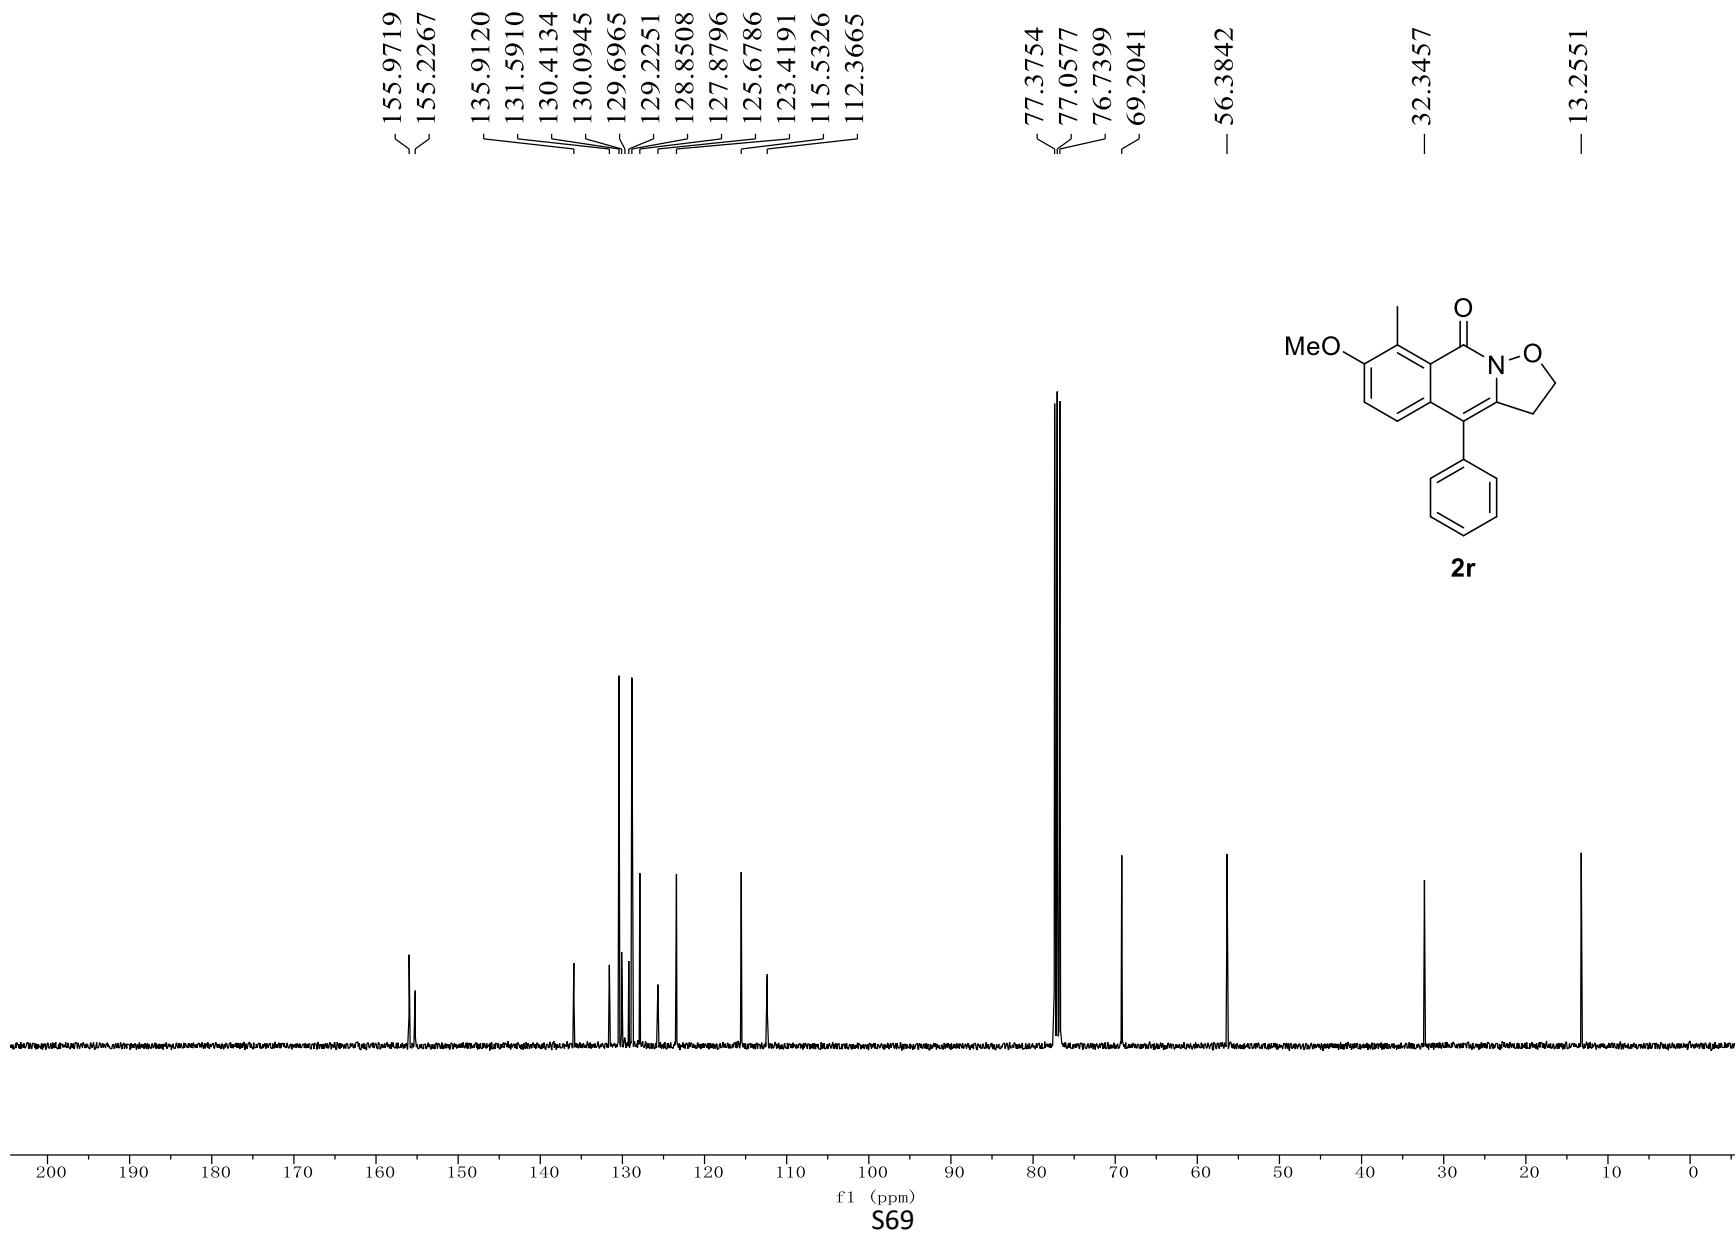

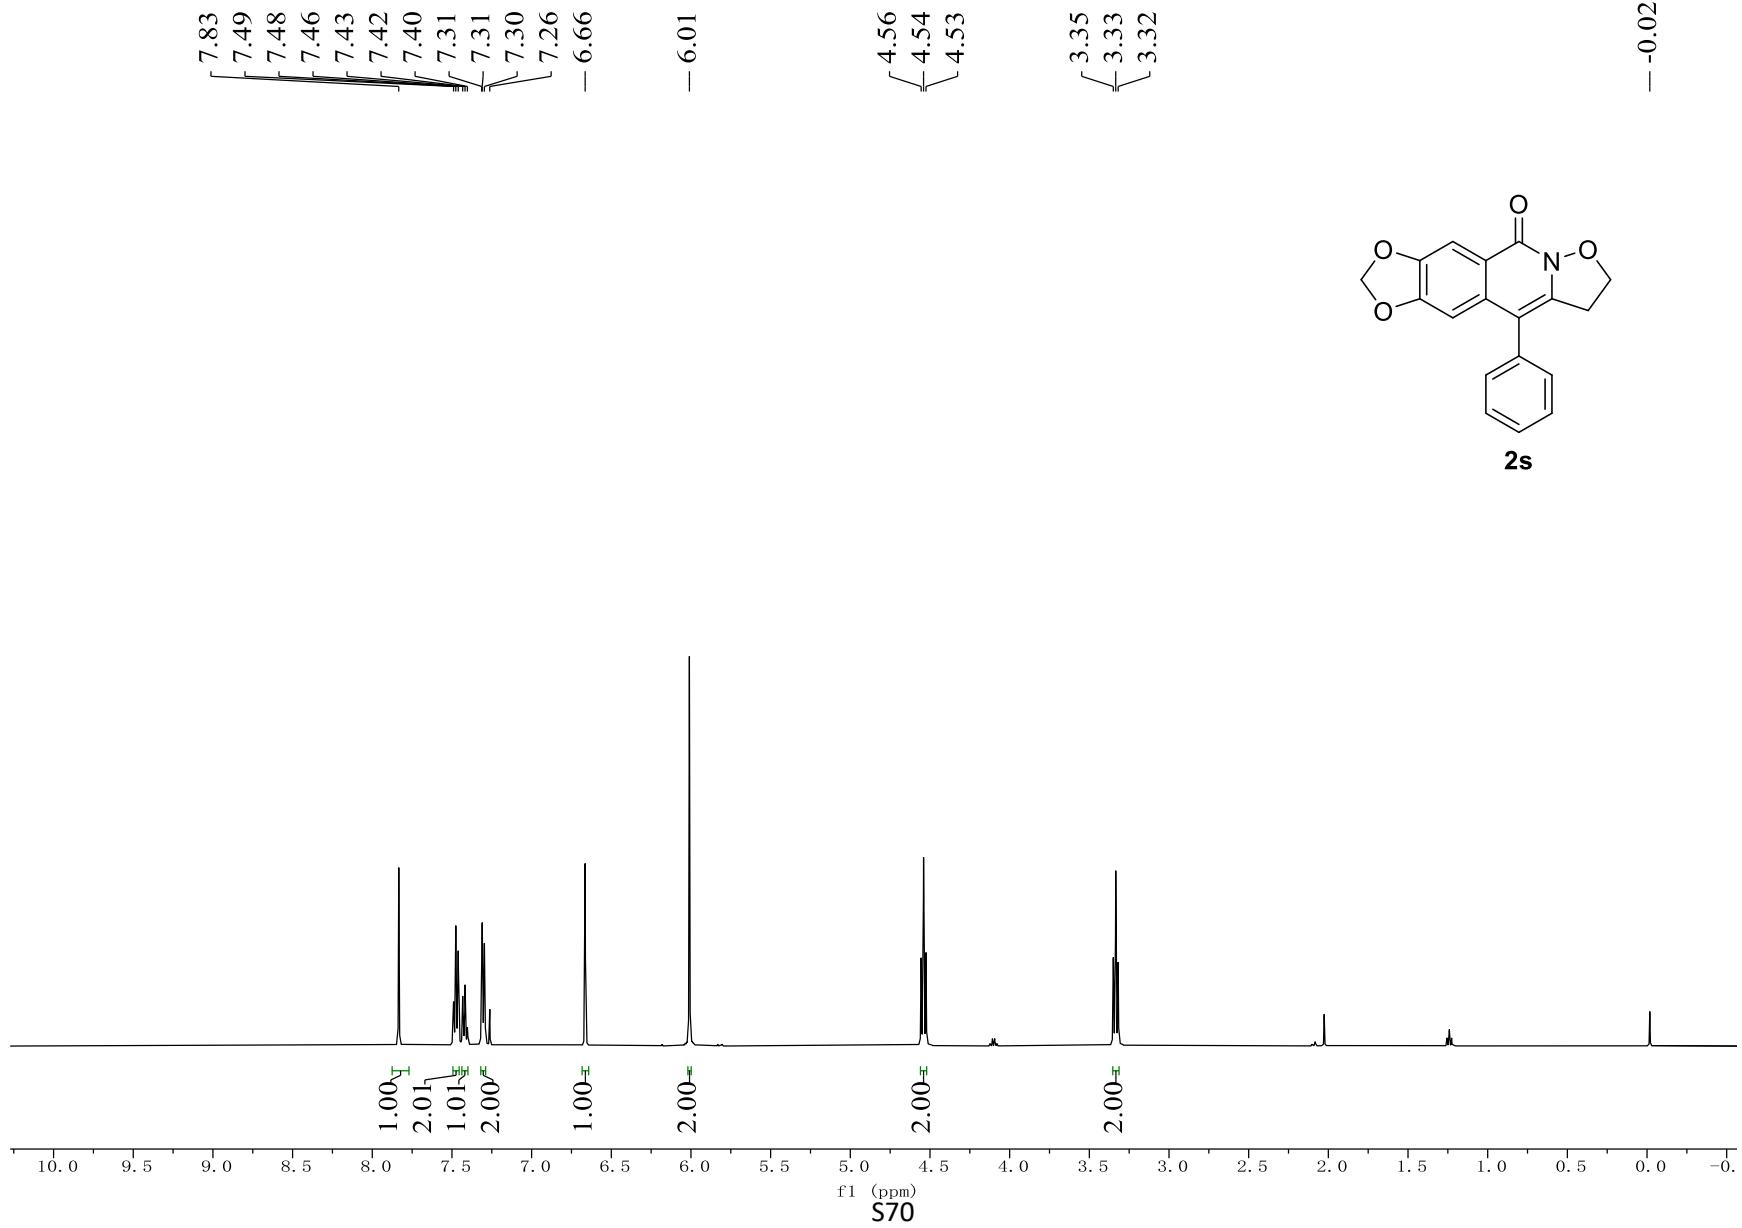

153.13  
151.56  
147.38  
135.18  
133.47  
131.19  
130.16  
128.91  
128.05  
121.83  
112.66  
105.11  
102.76  
101.82

77.27  
77.01  
76.76  
69.61

32.39

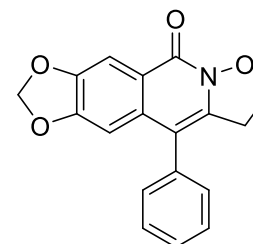

**2s**

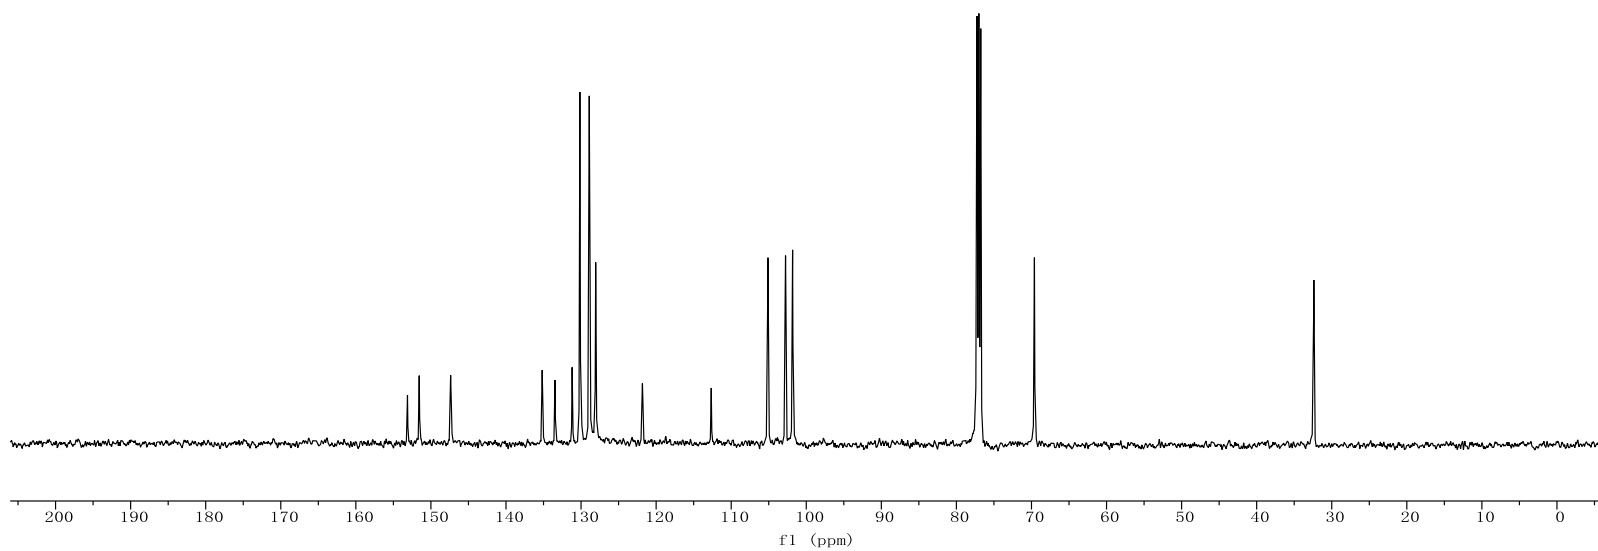



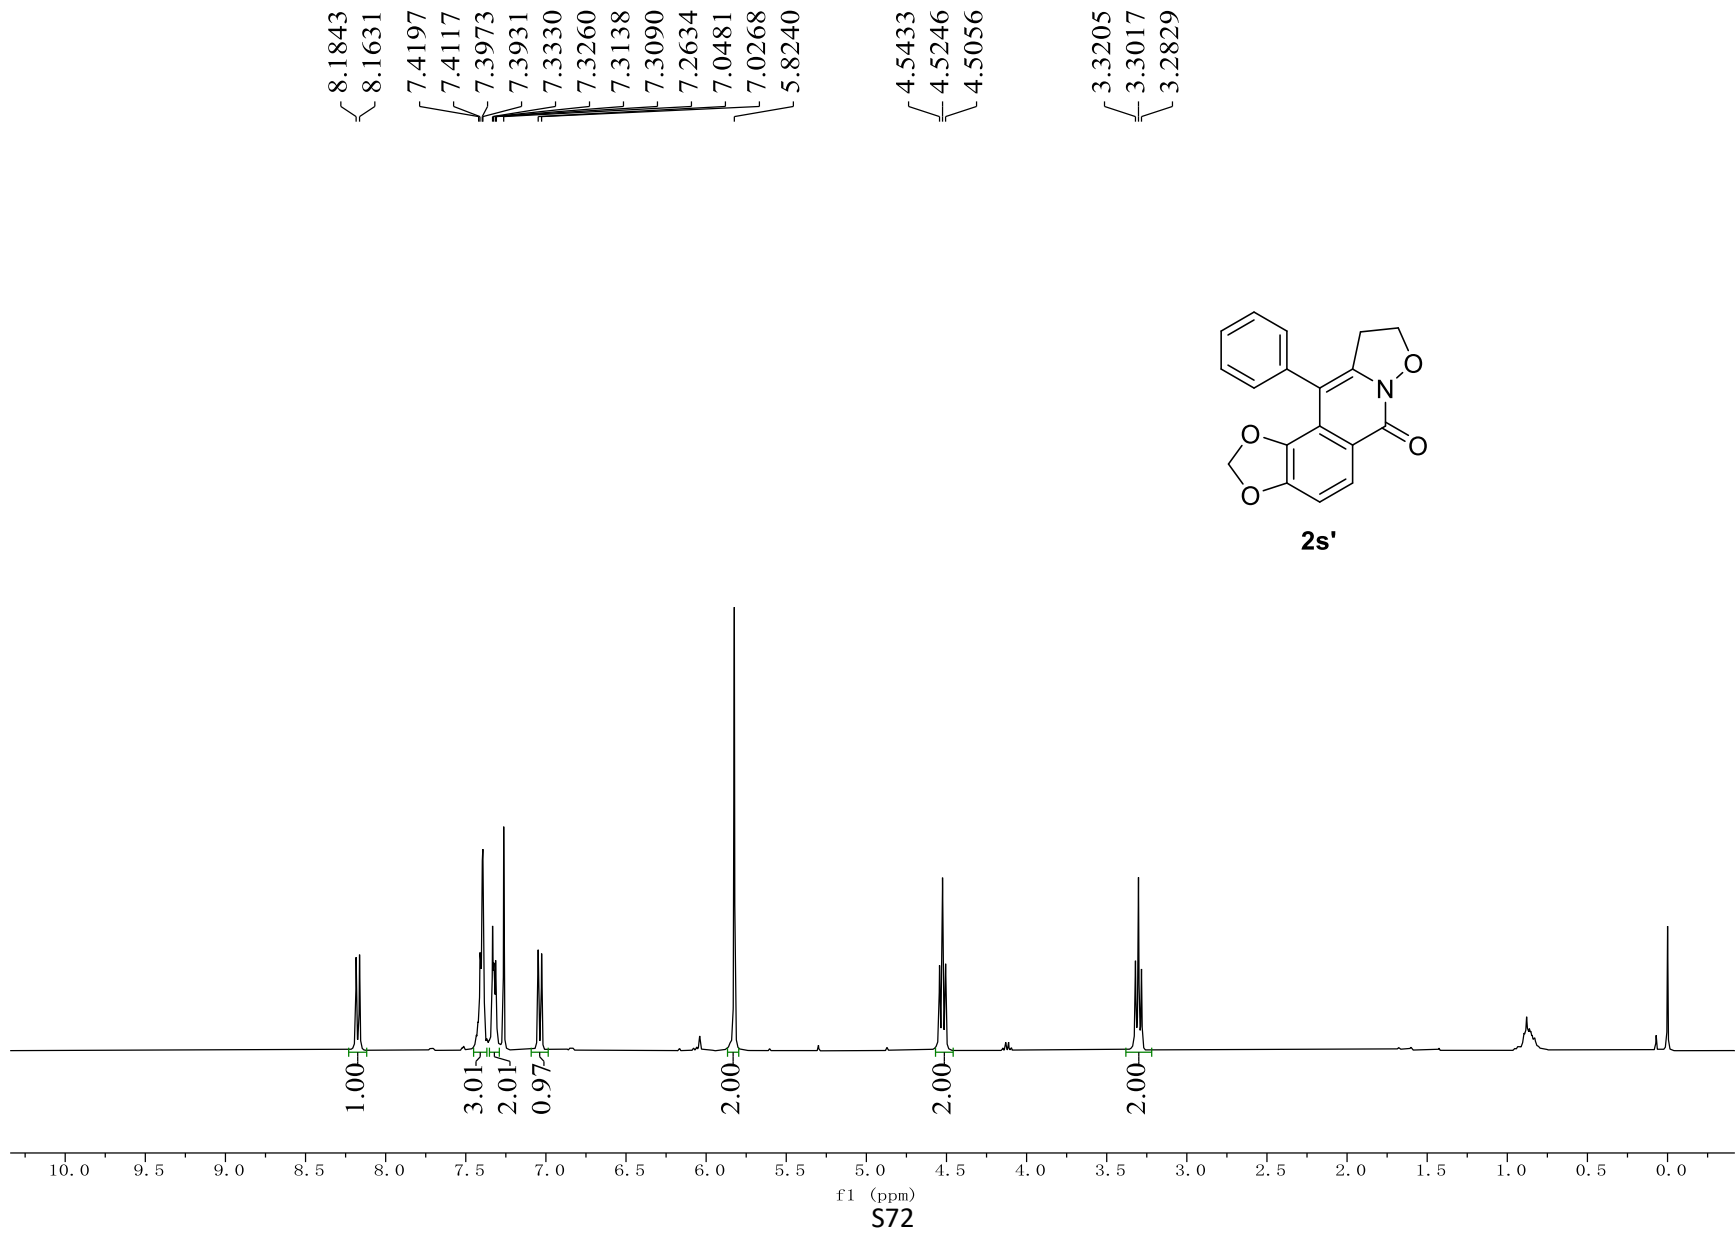

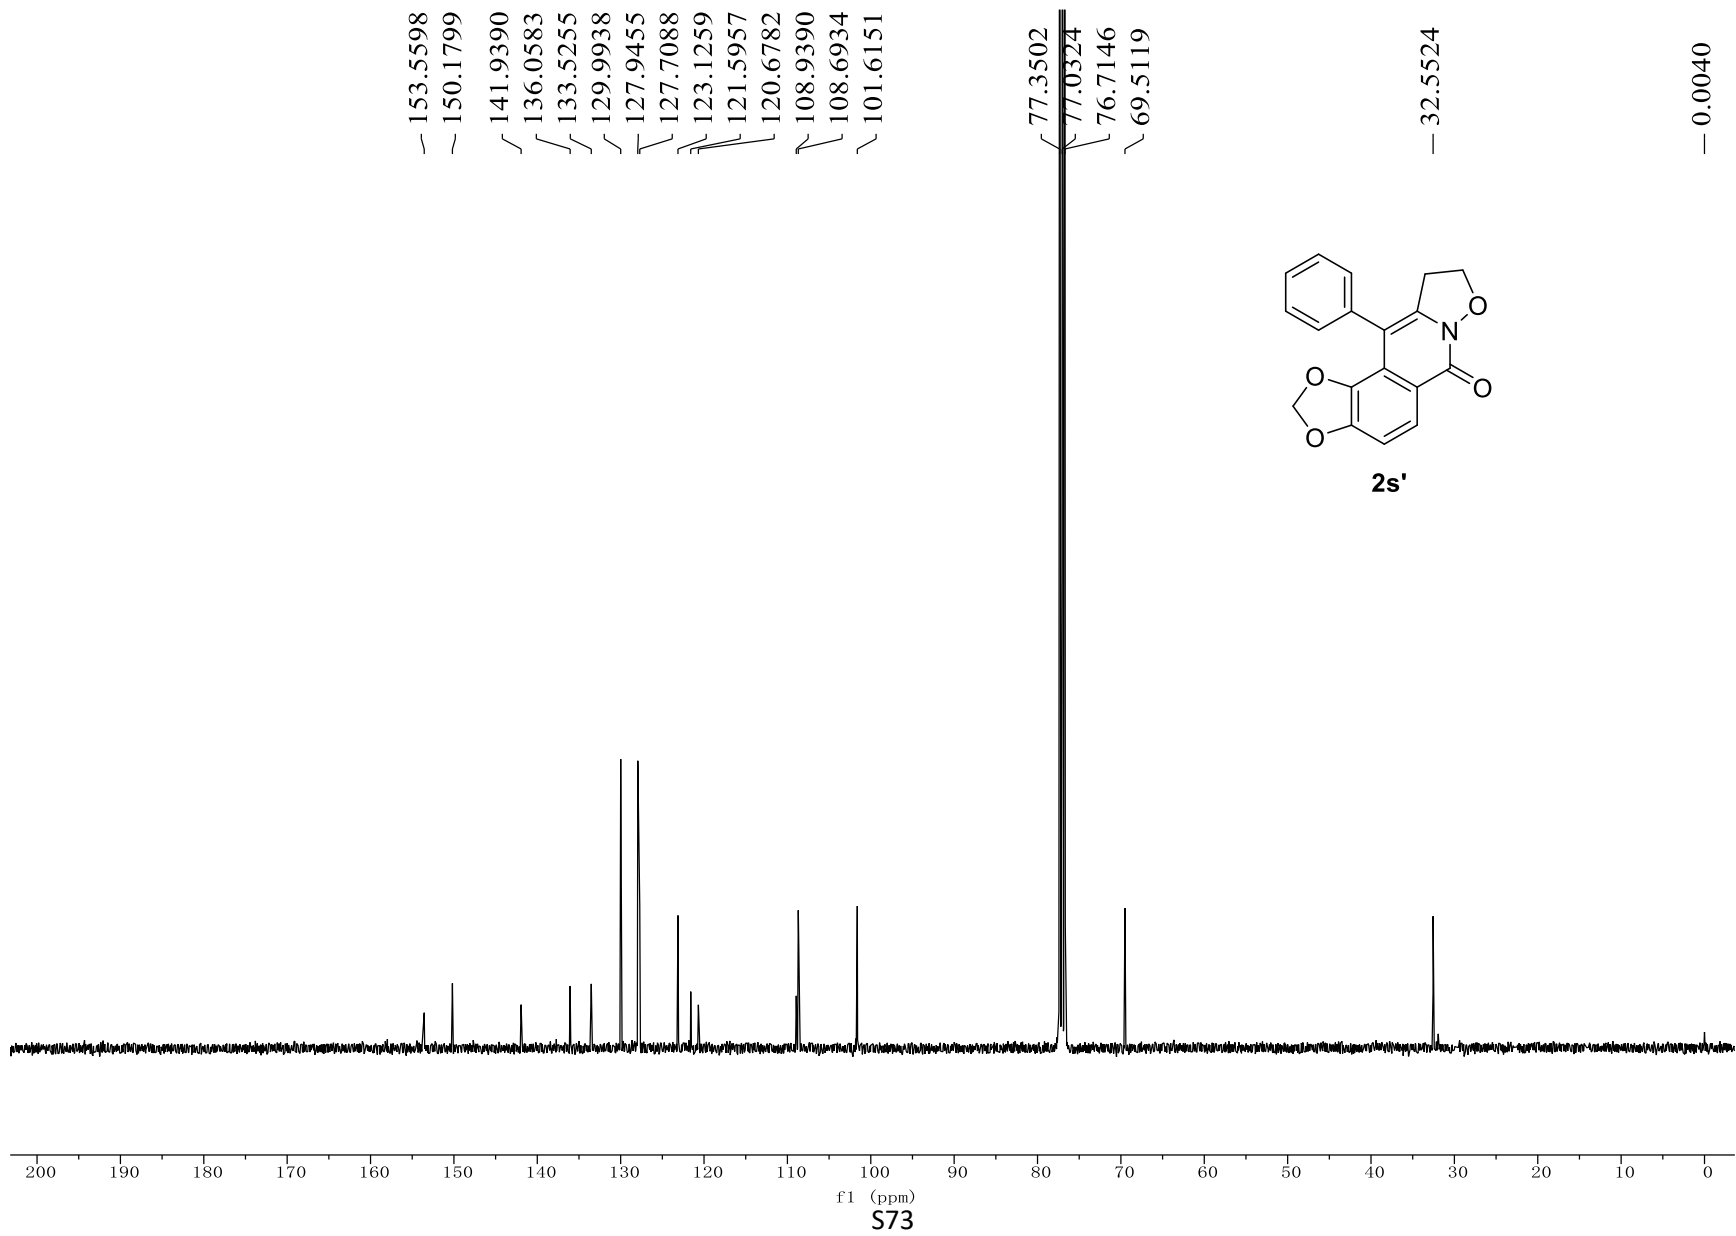

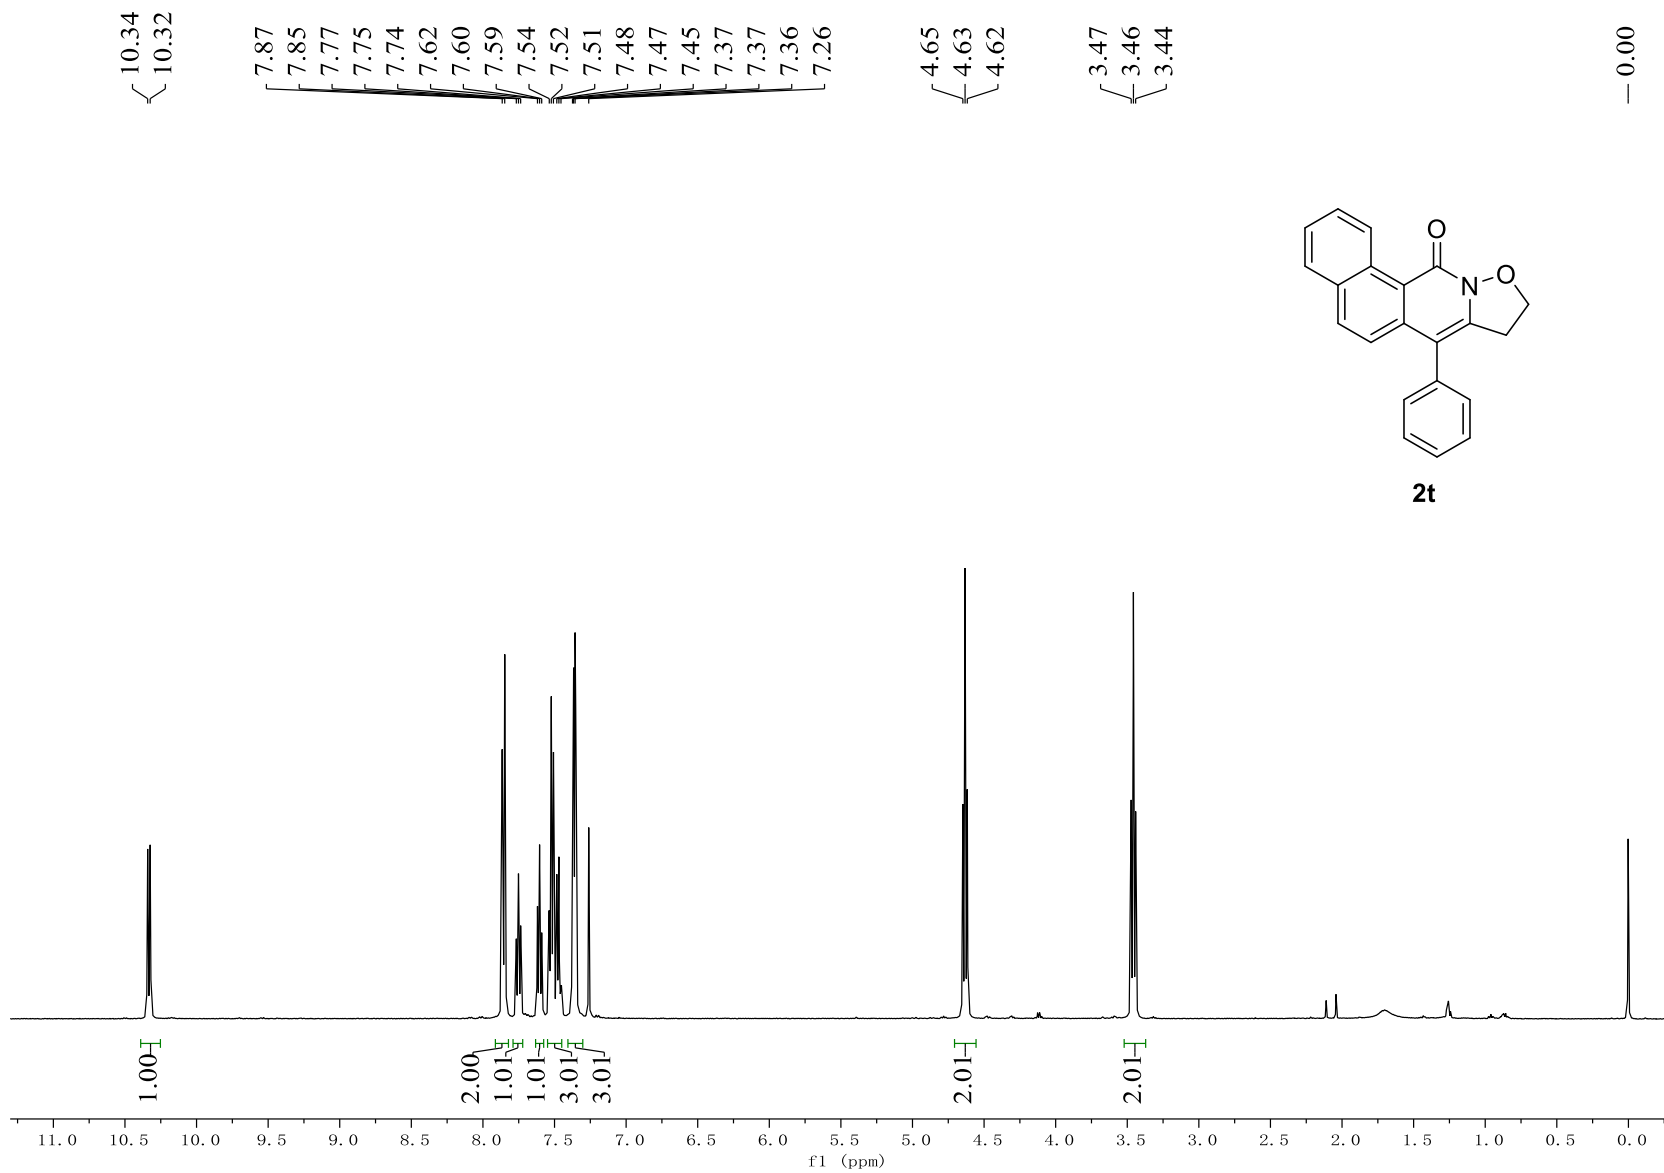

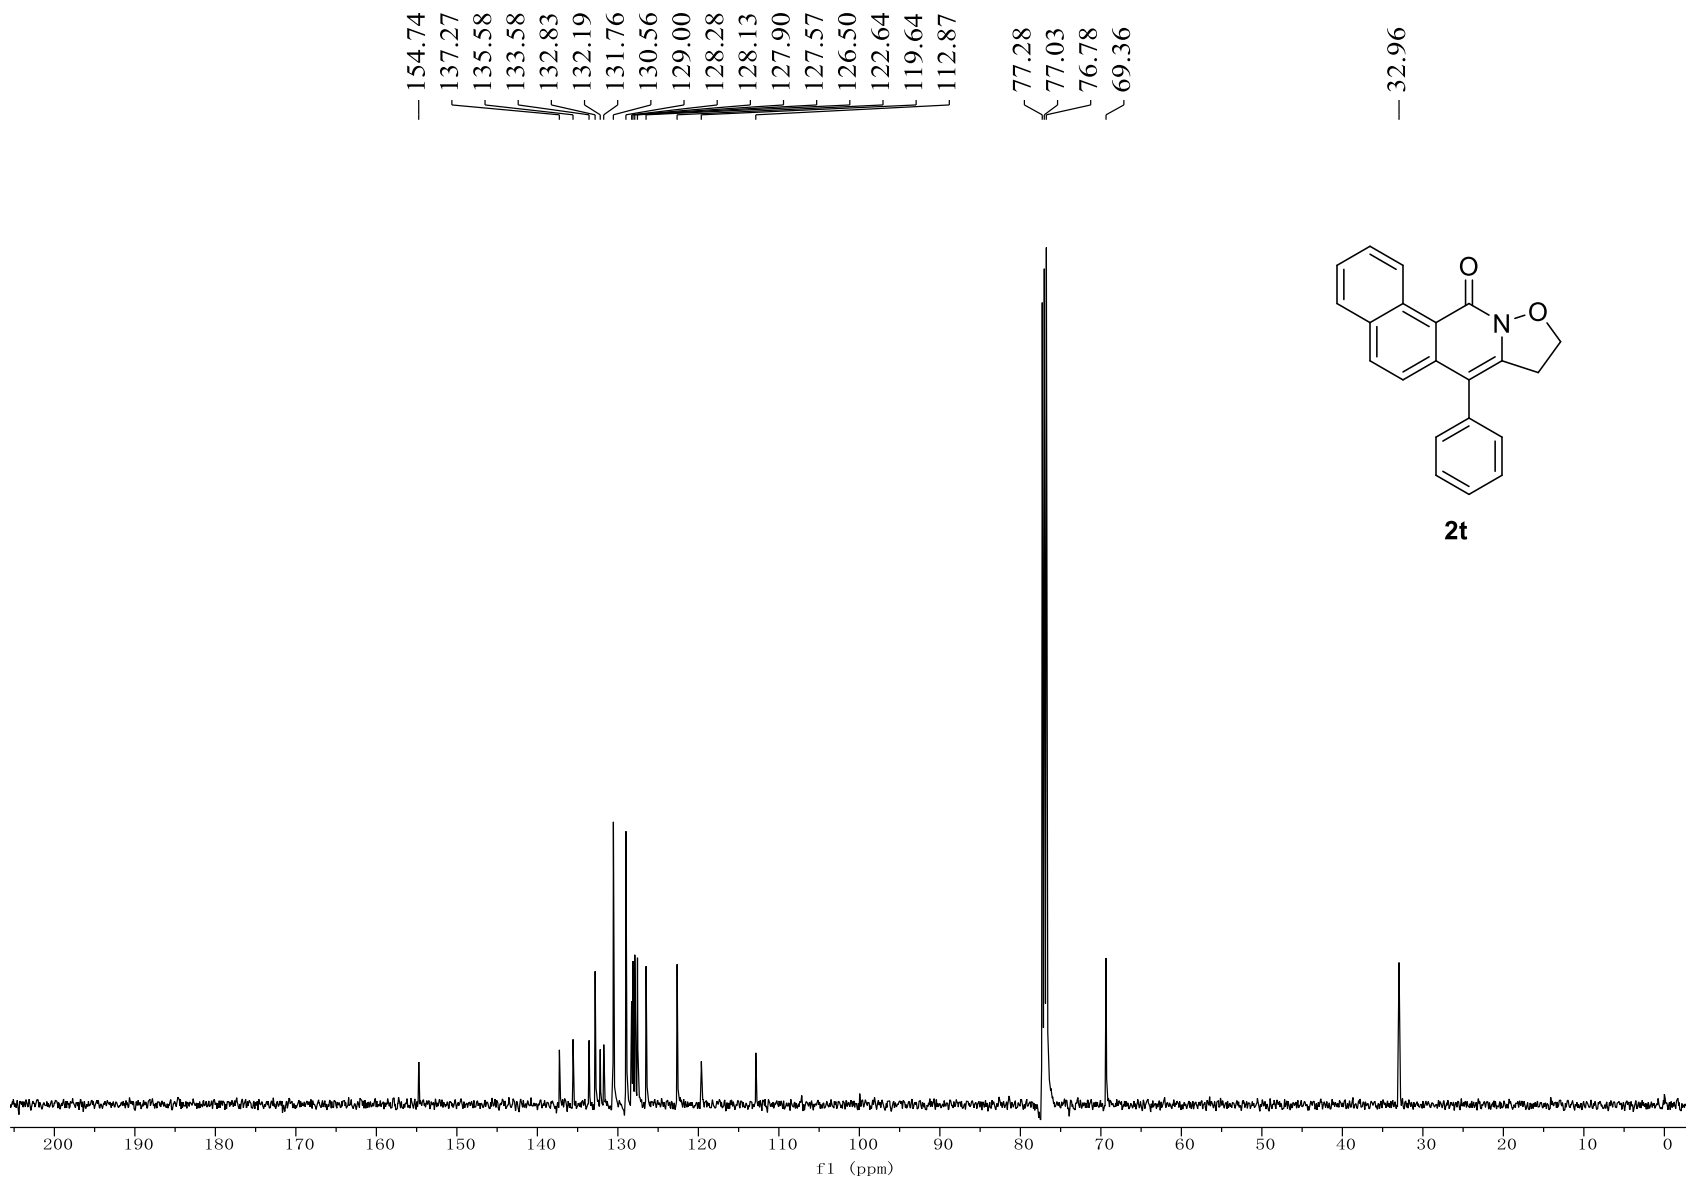

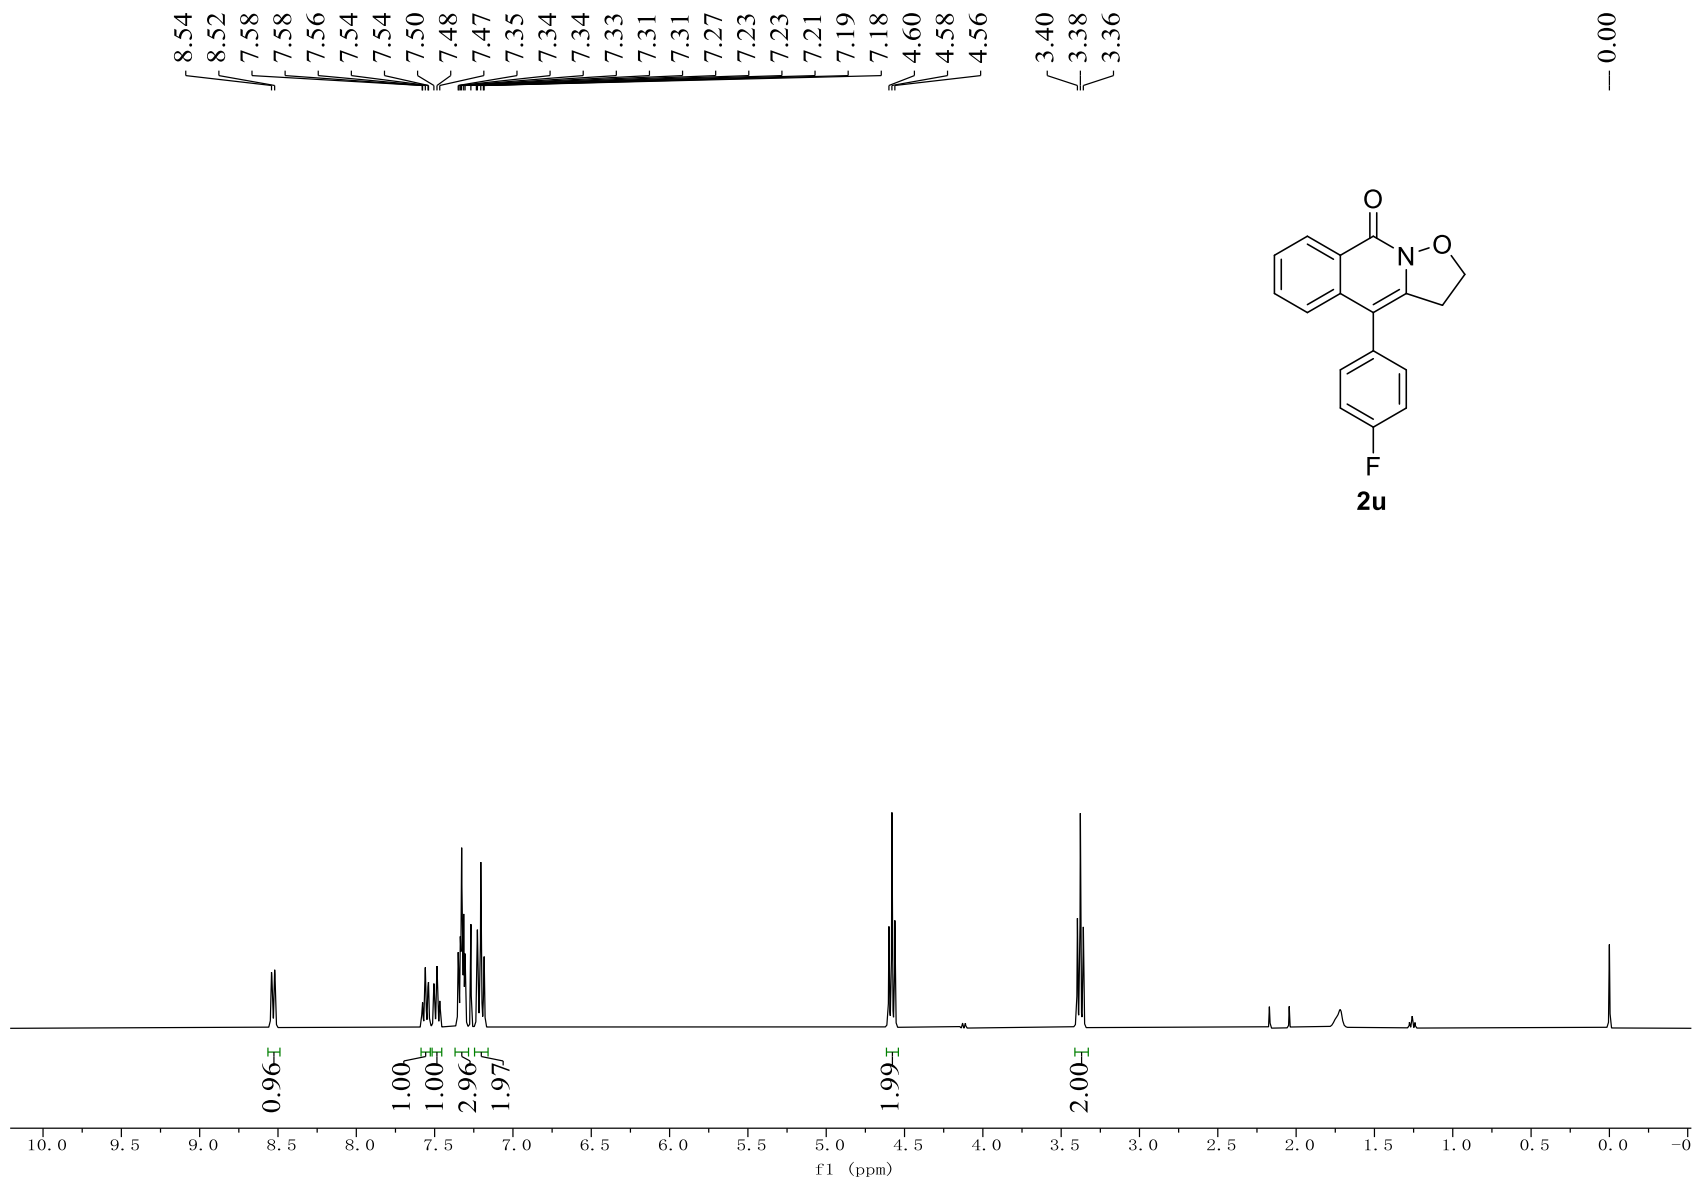

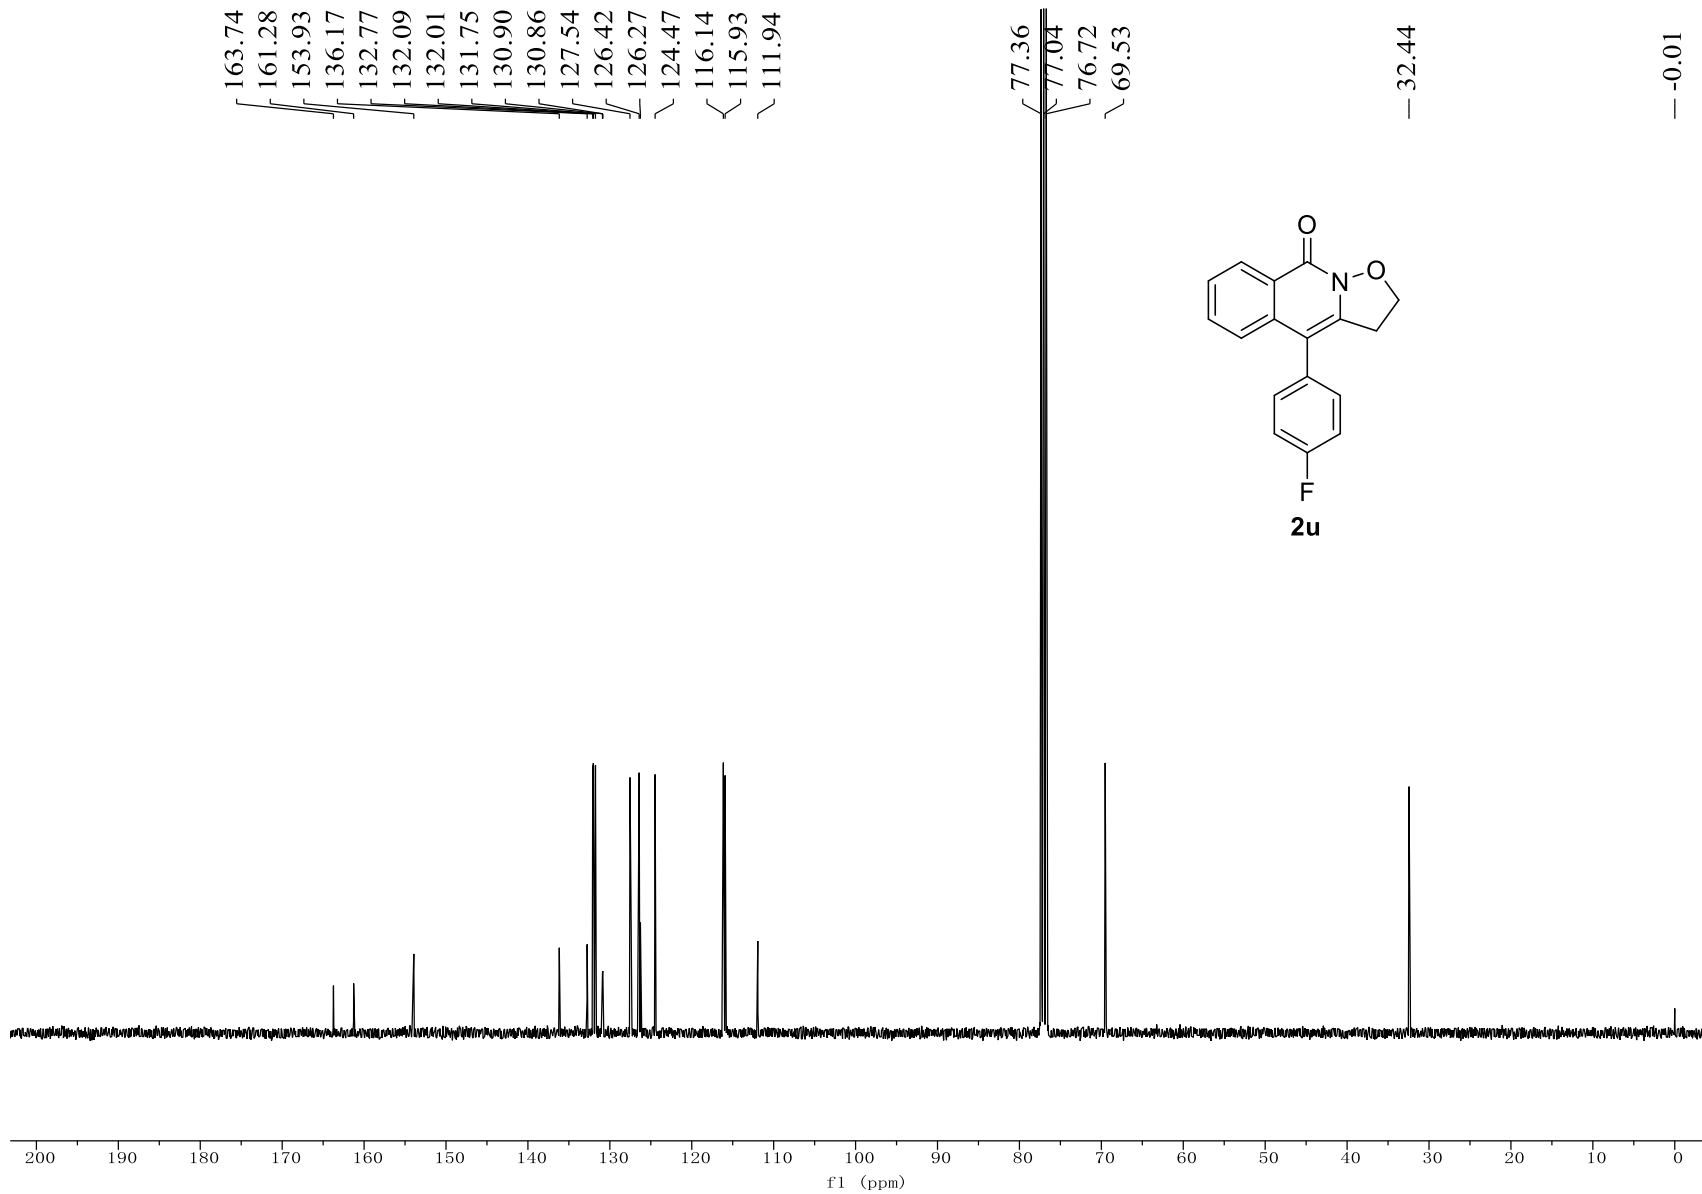

S77

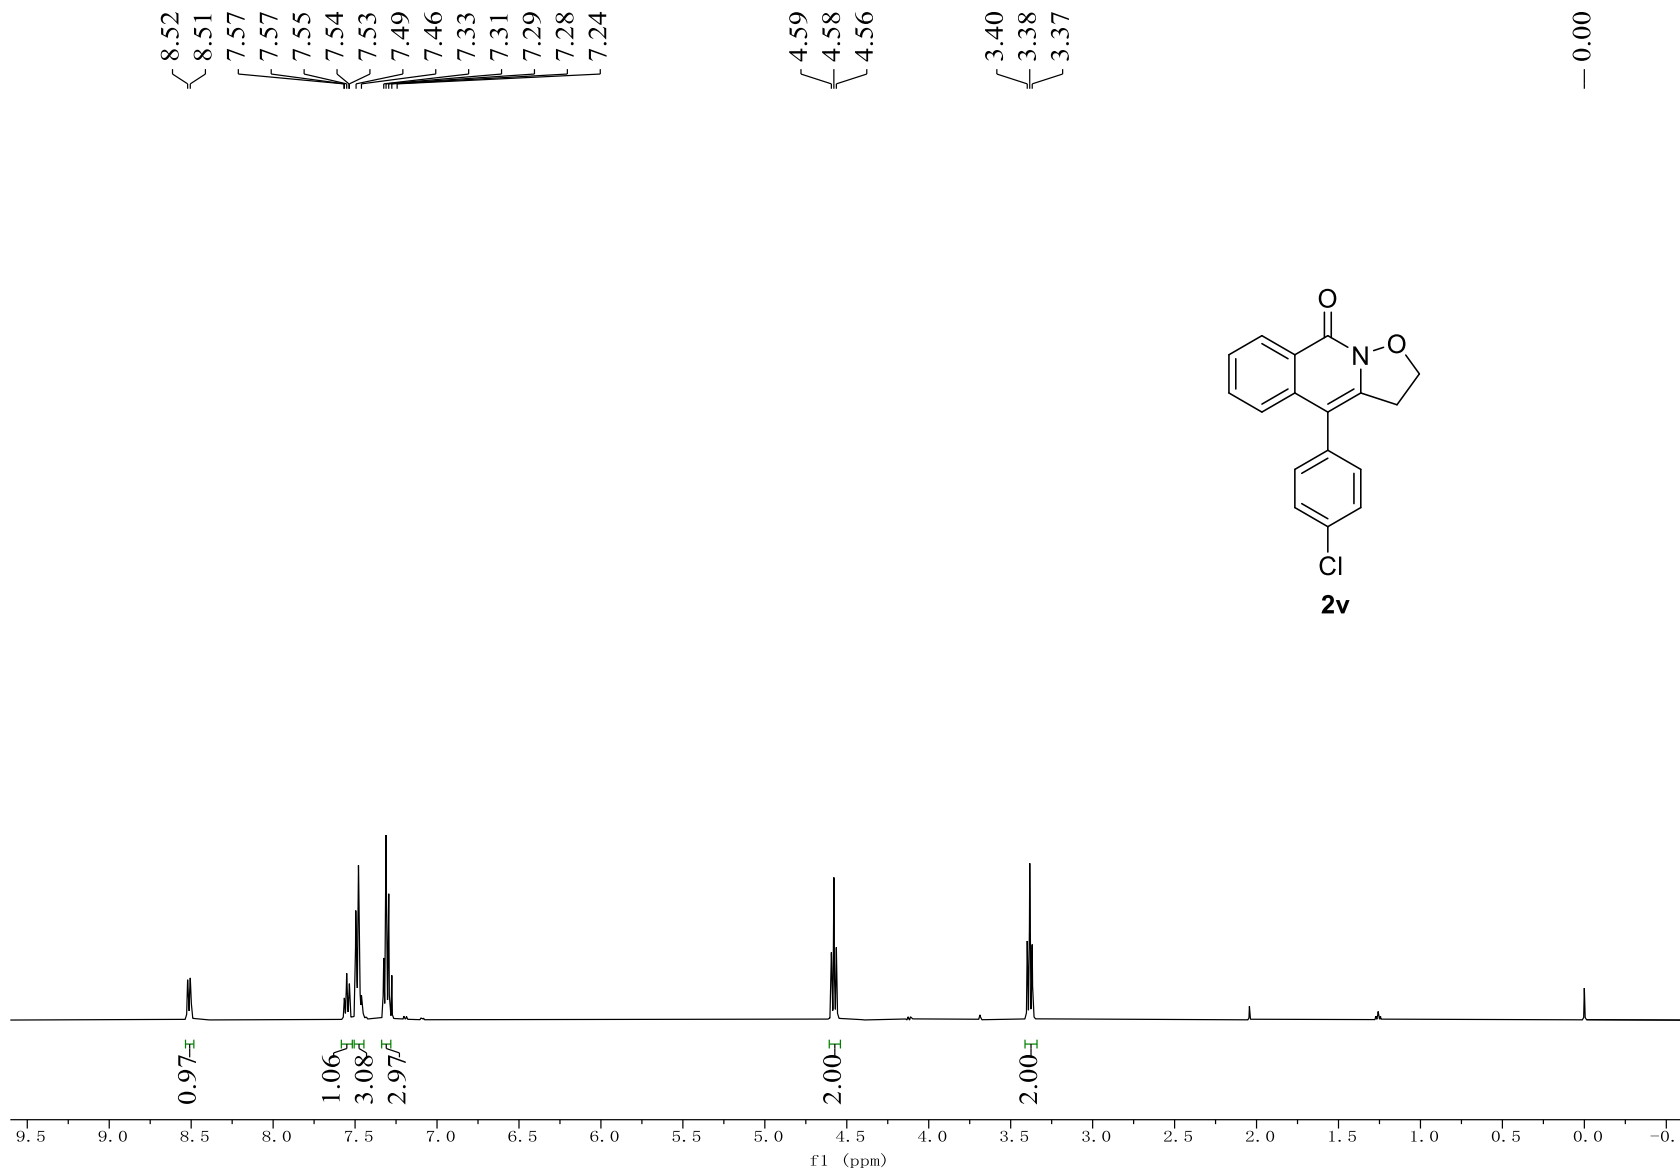

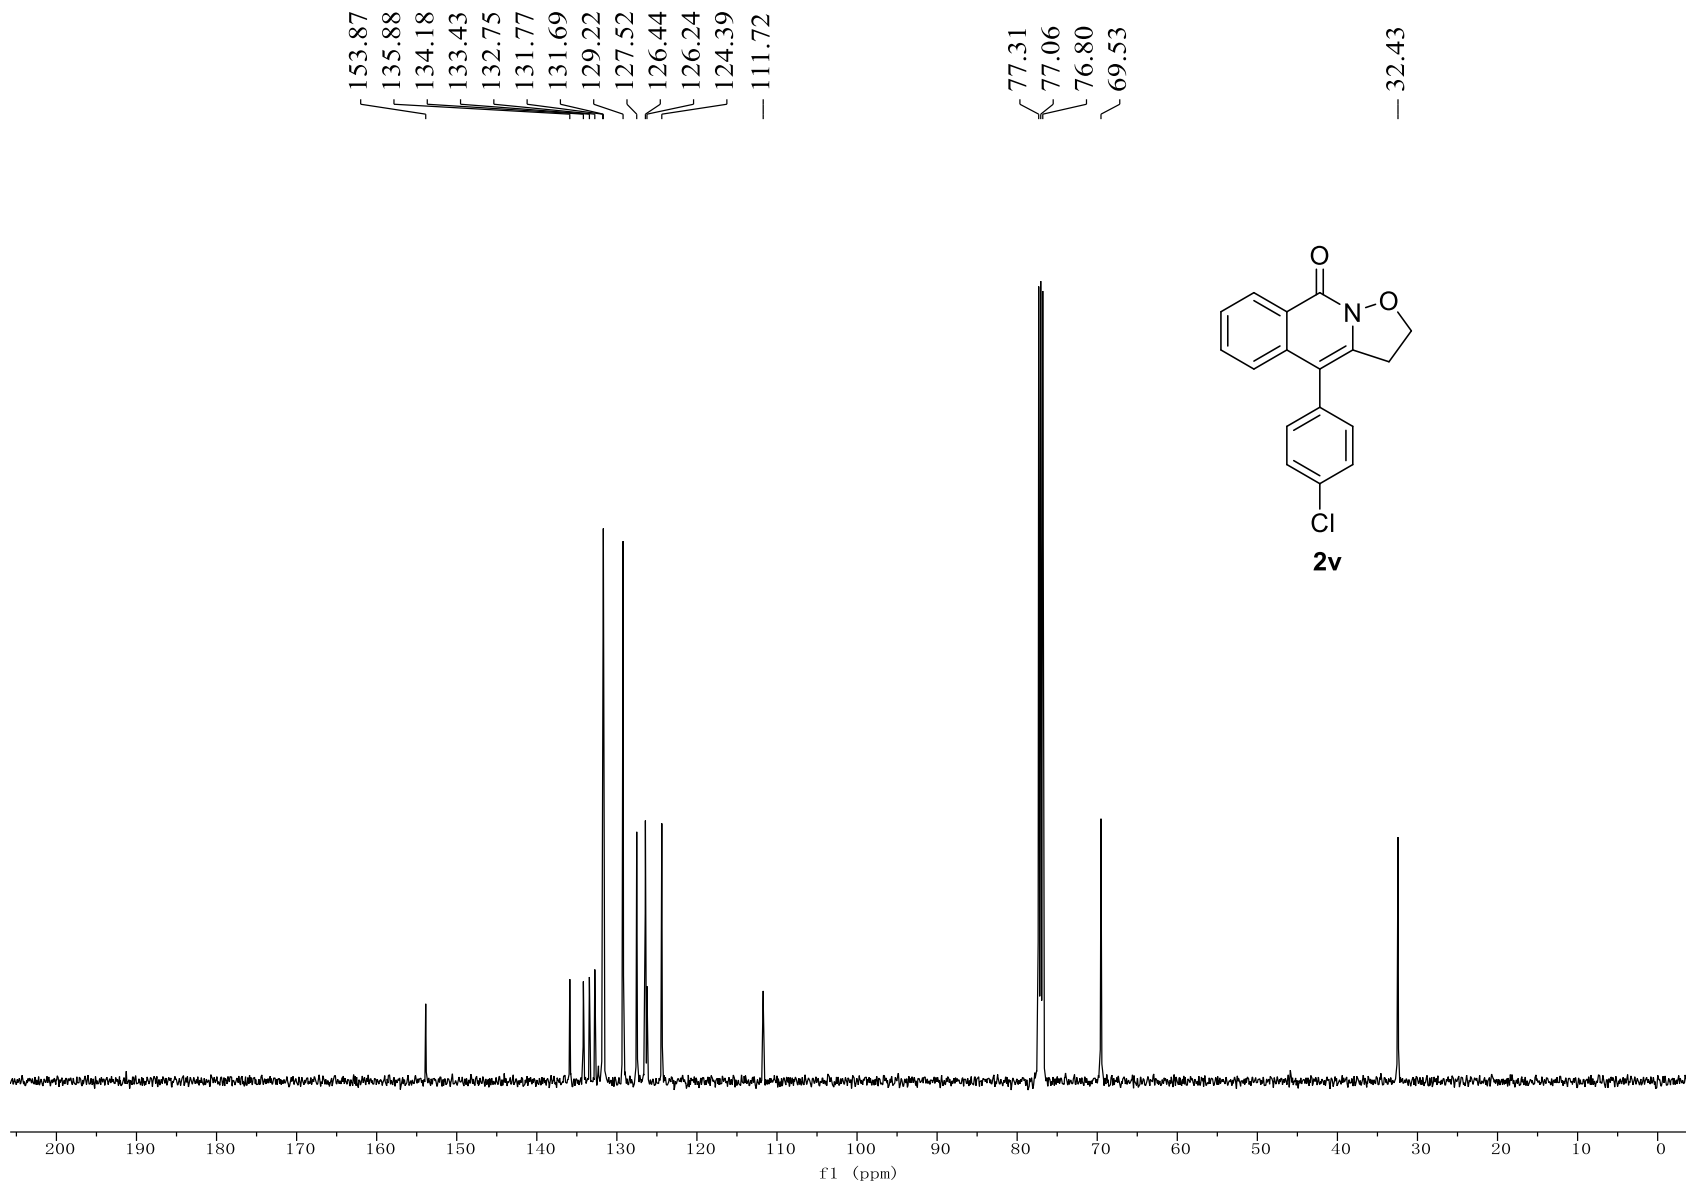



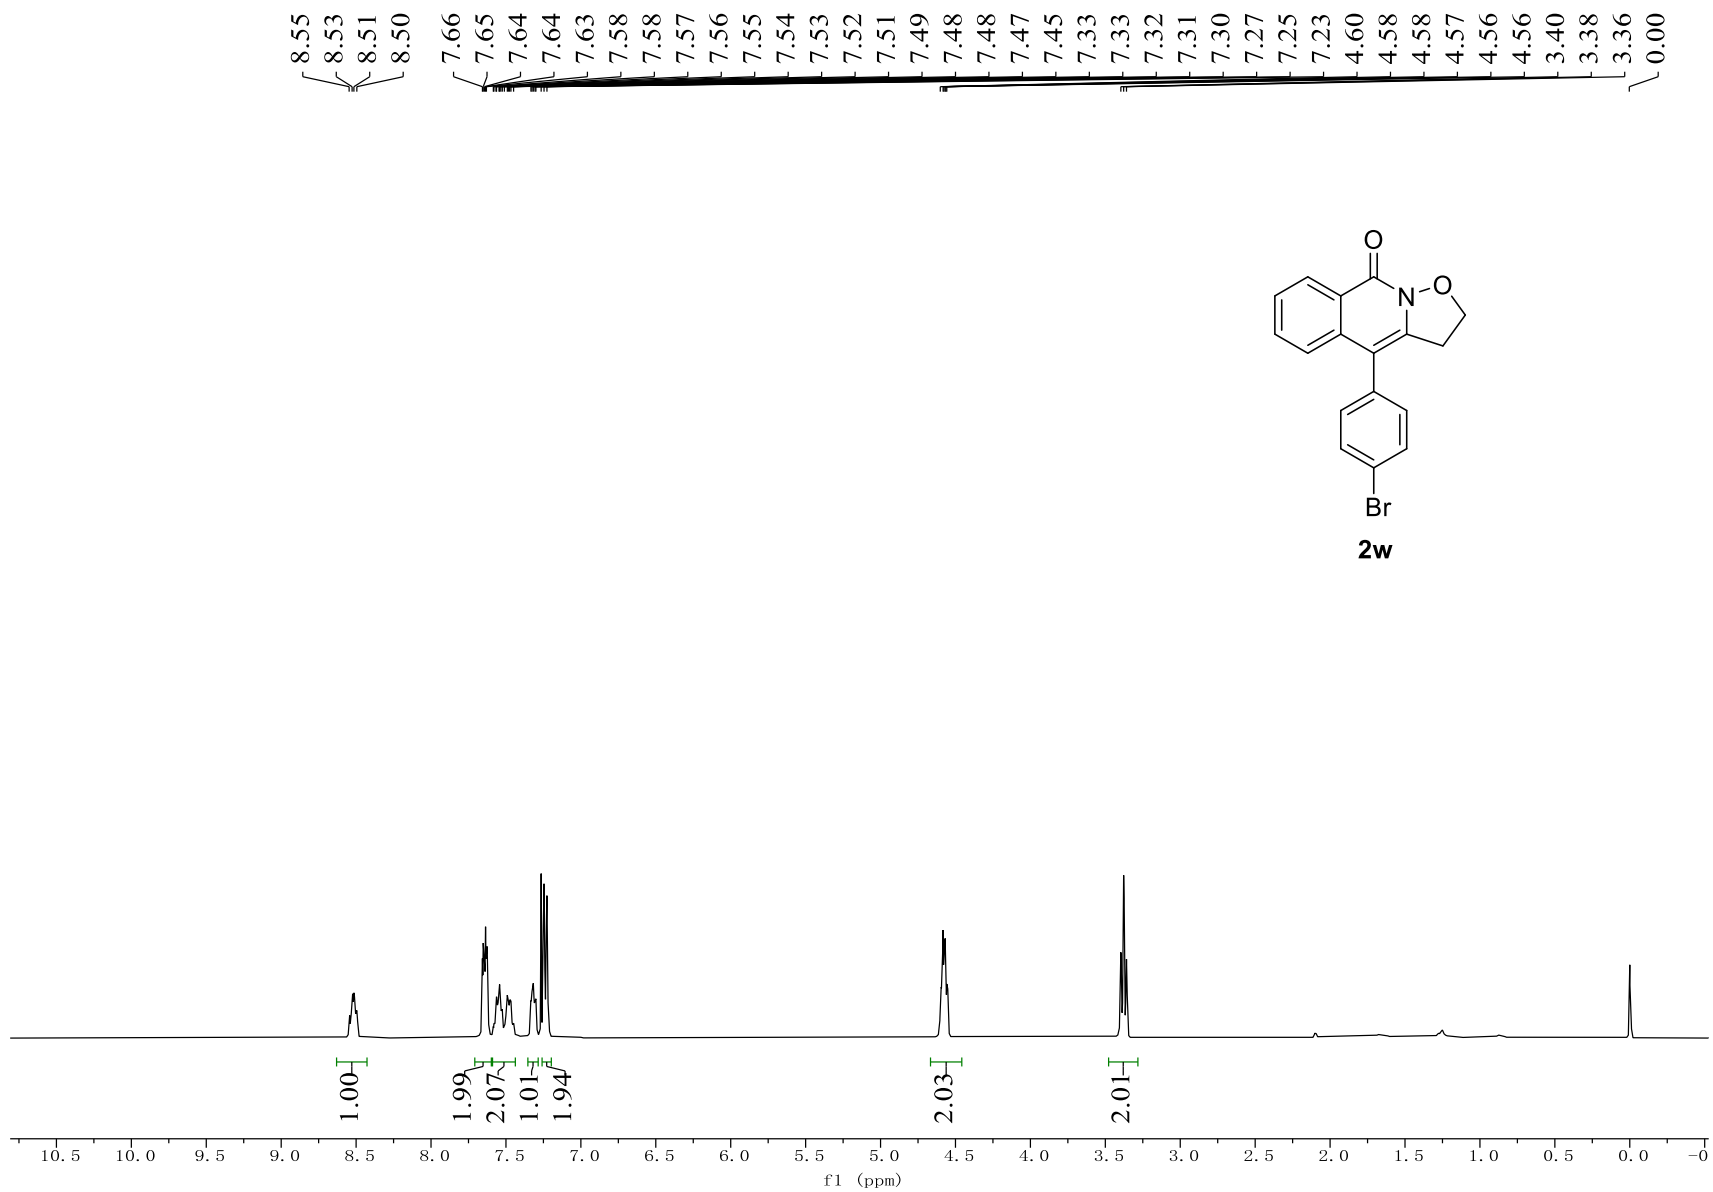

S80

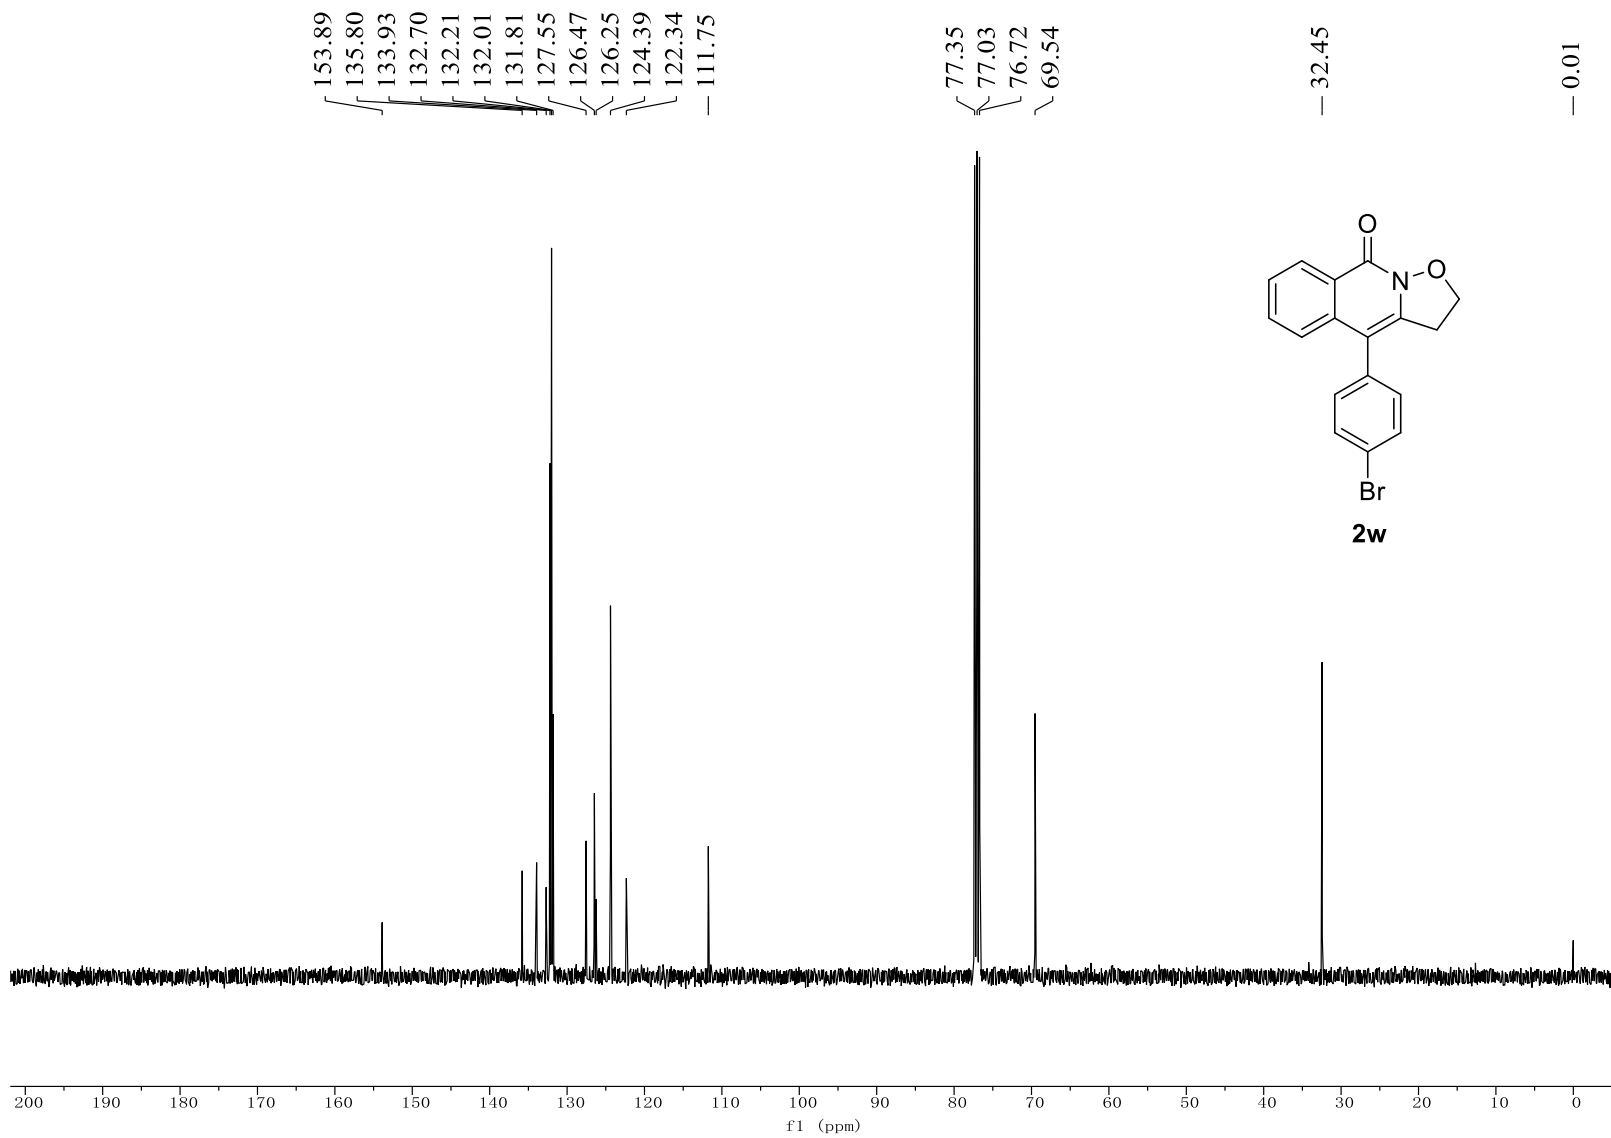

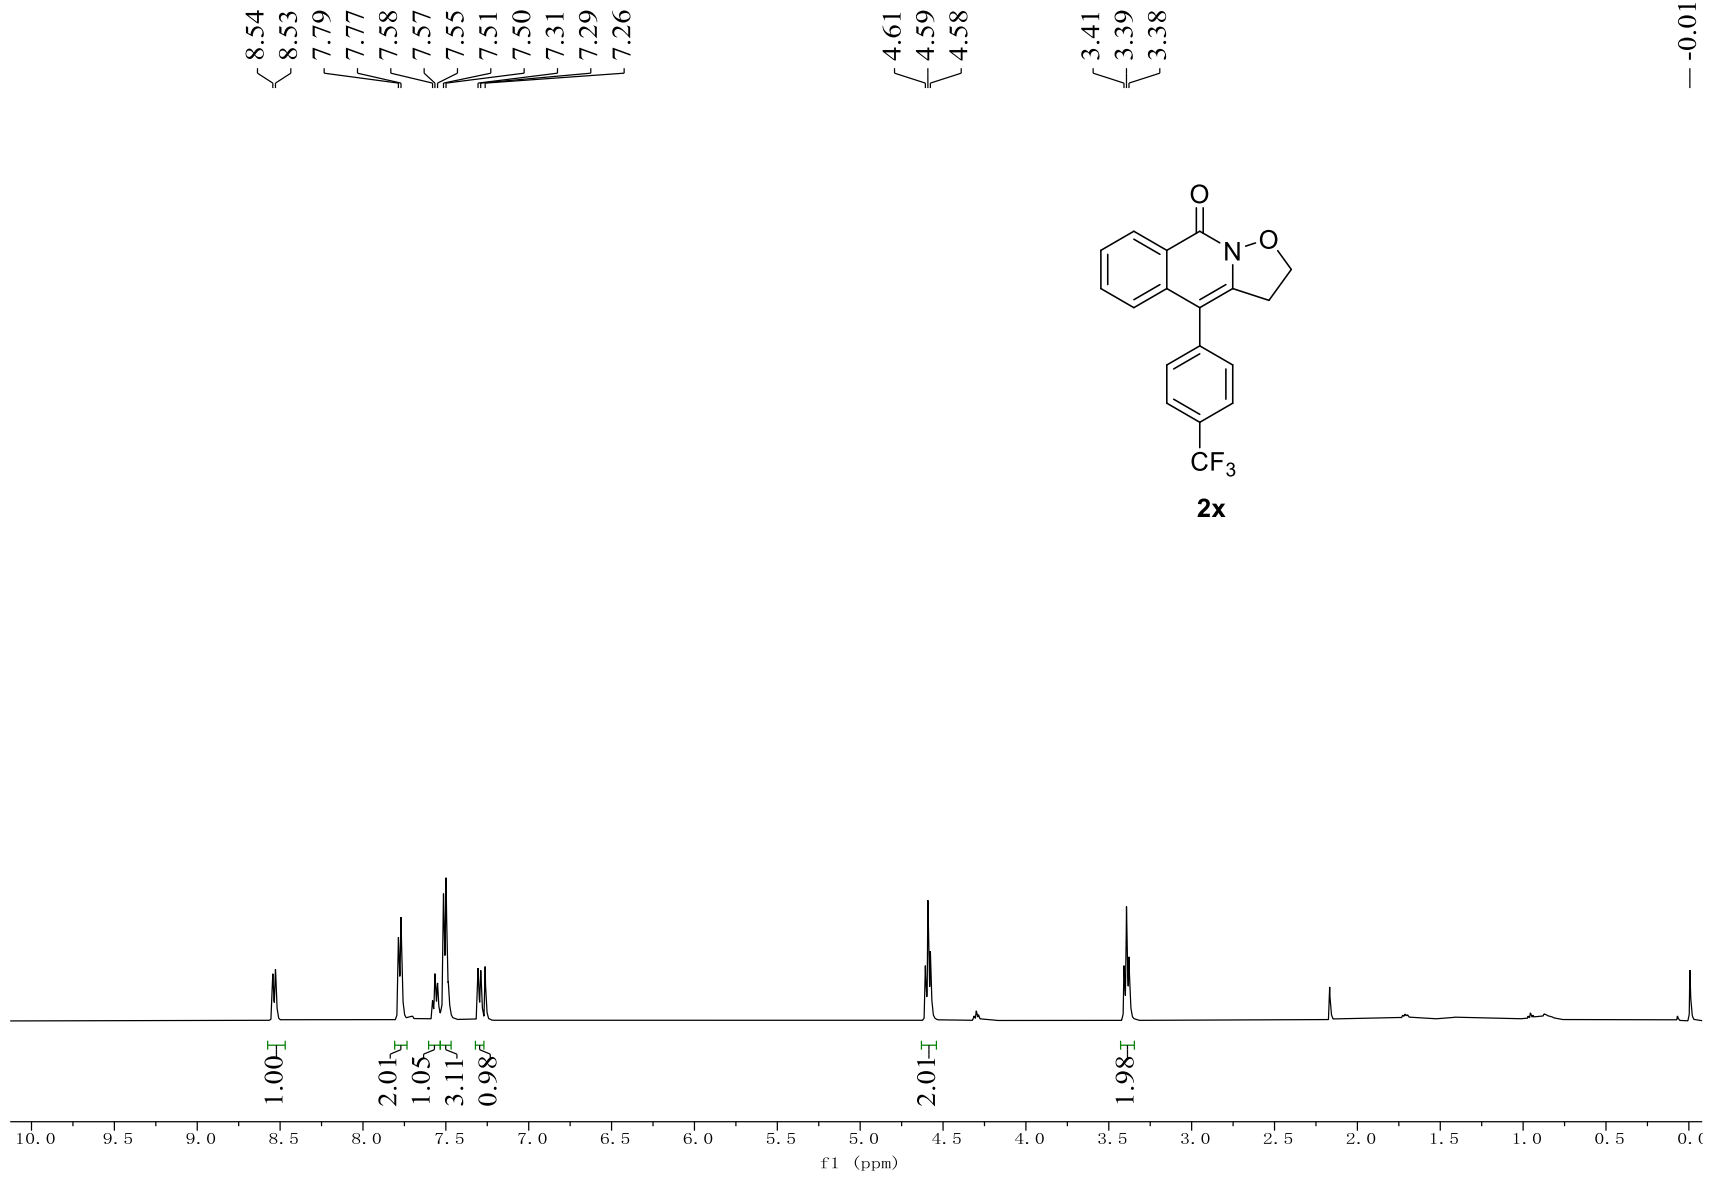

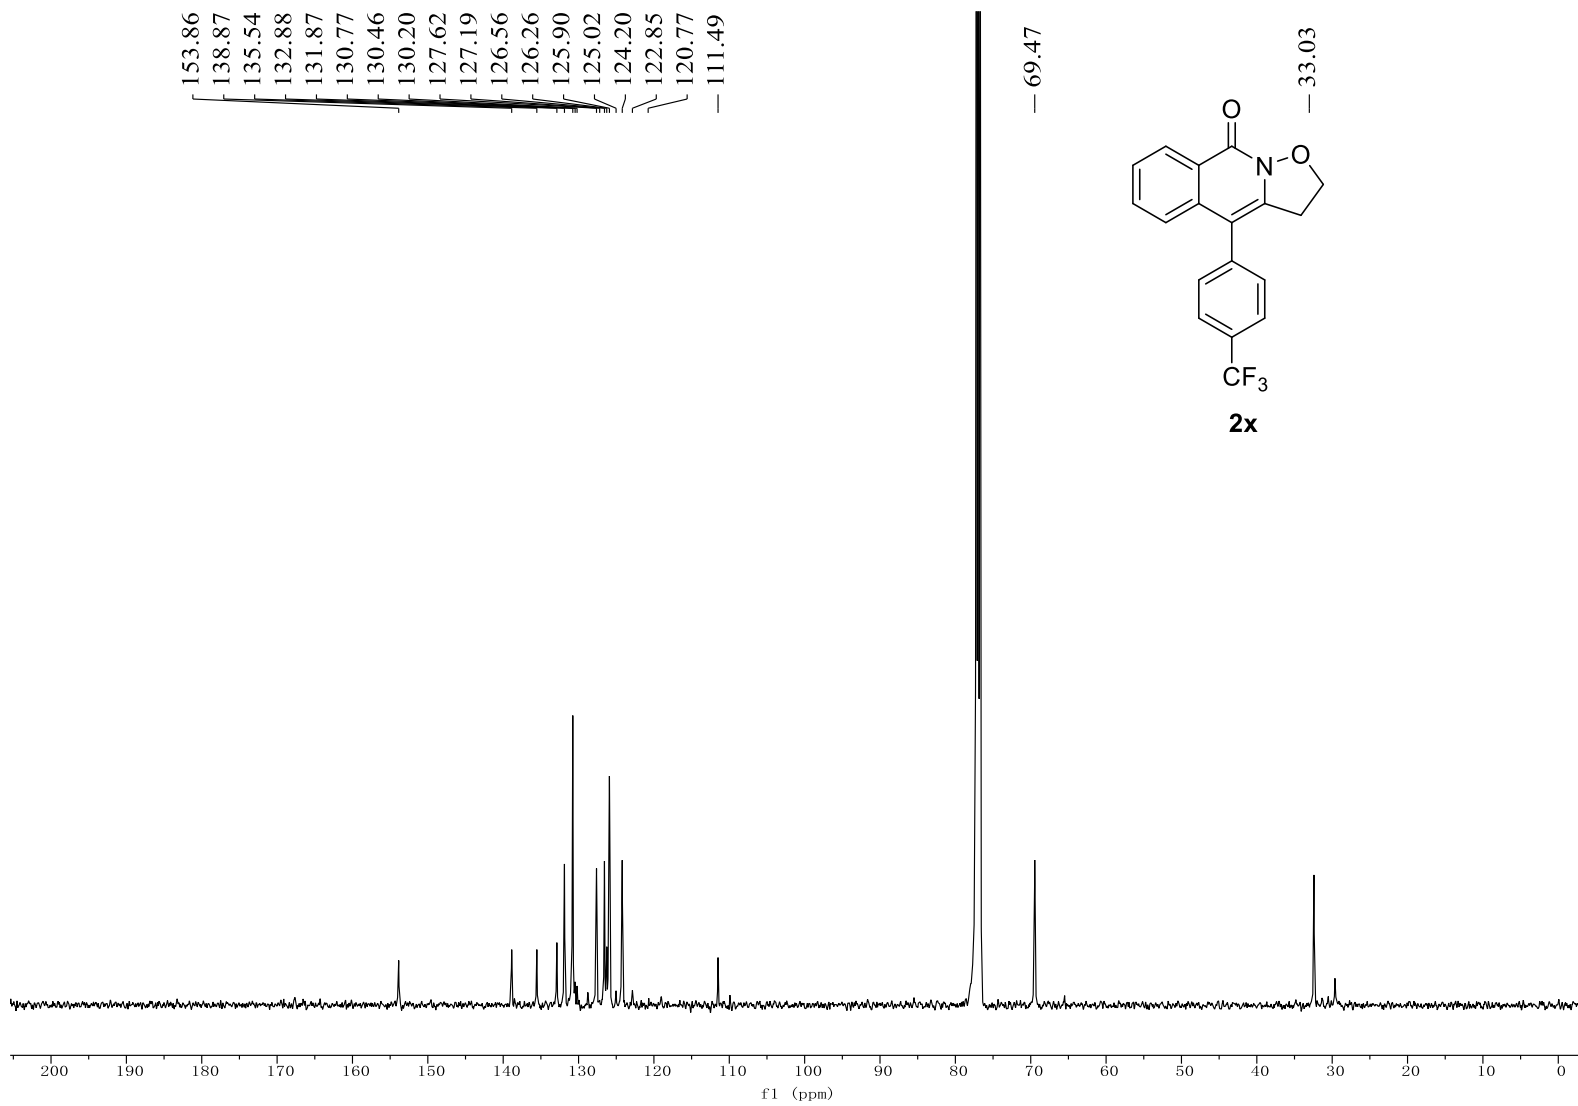

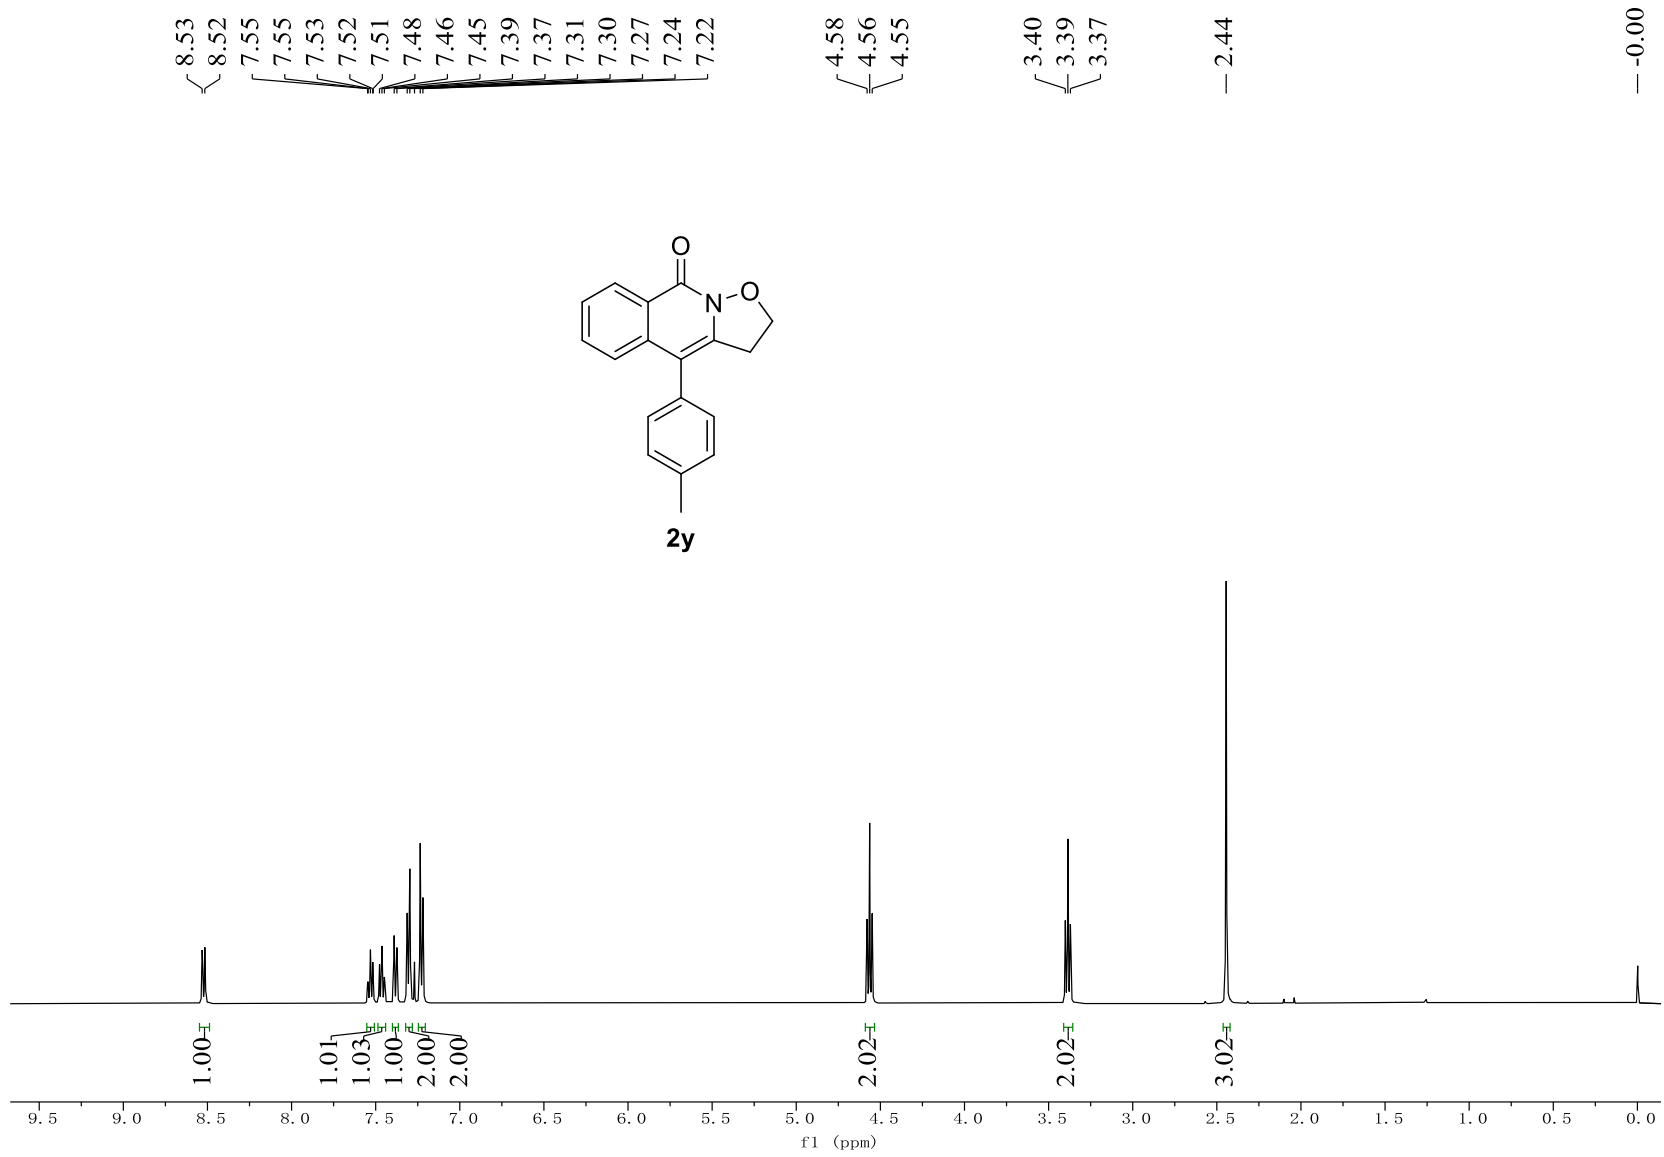

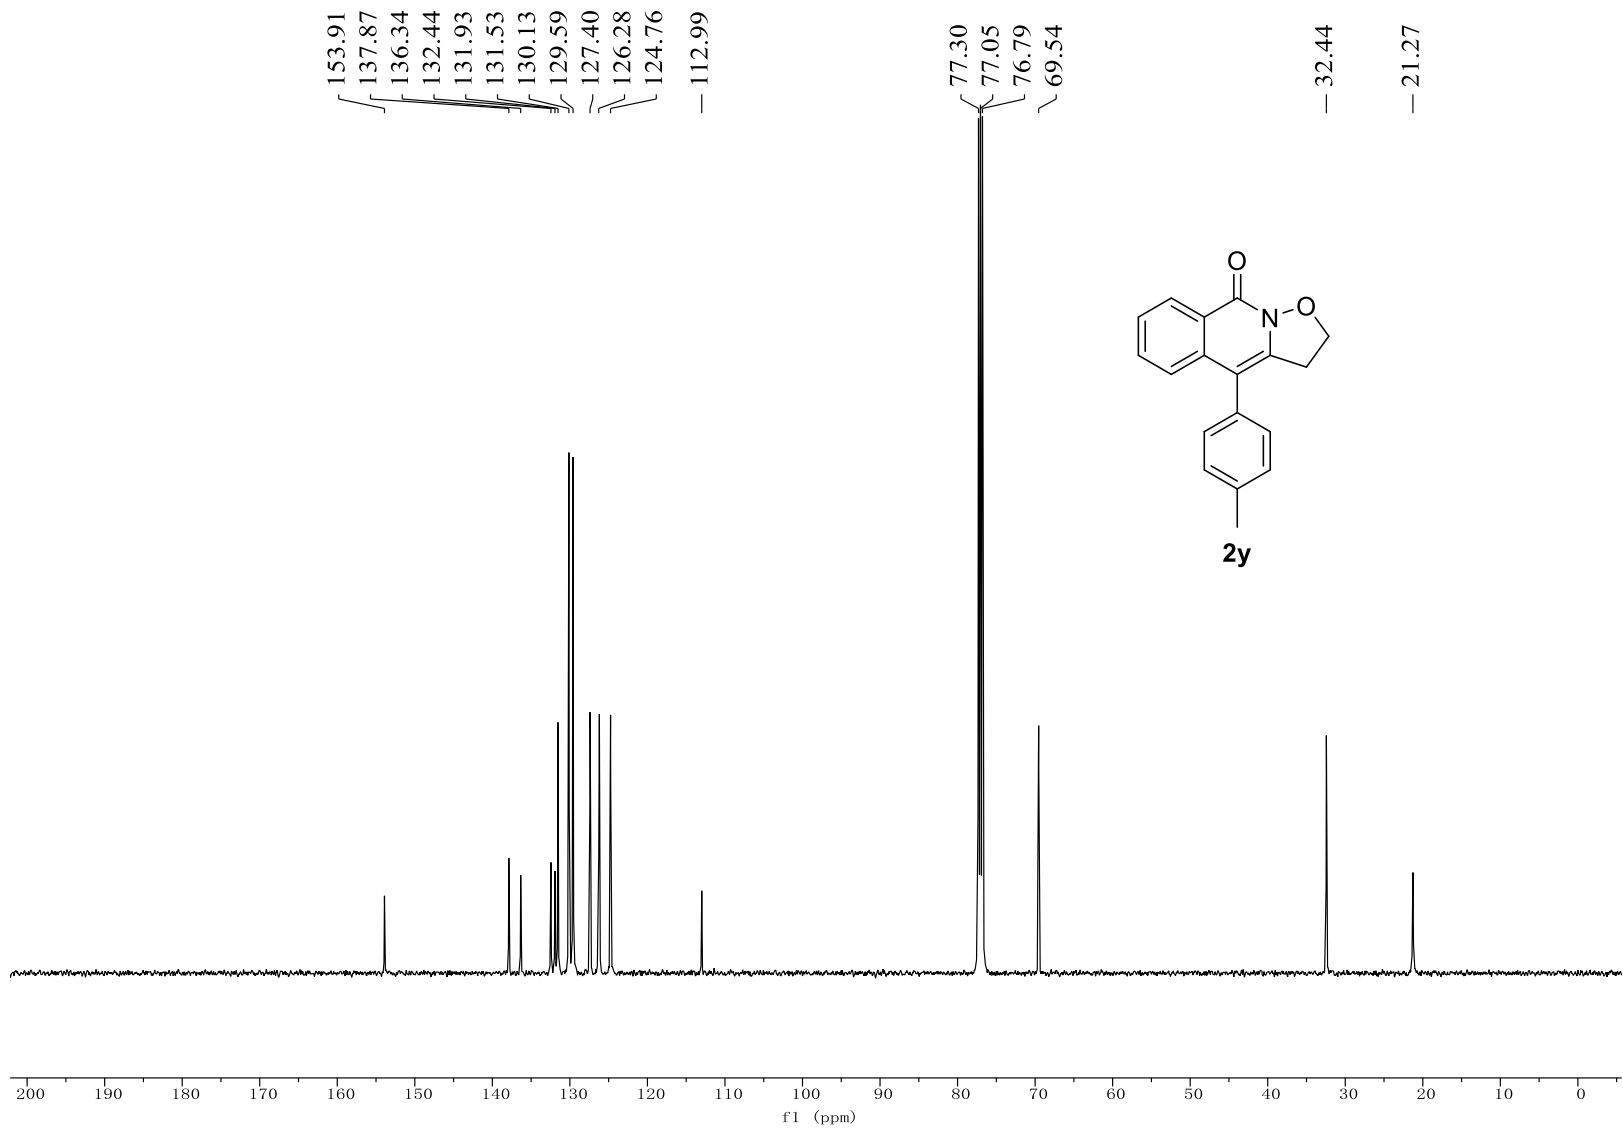

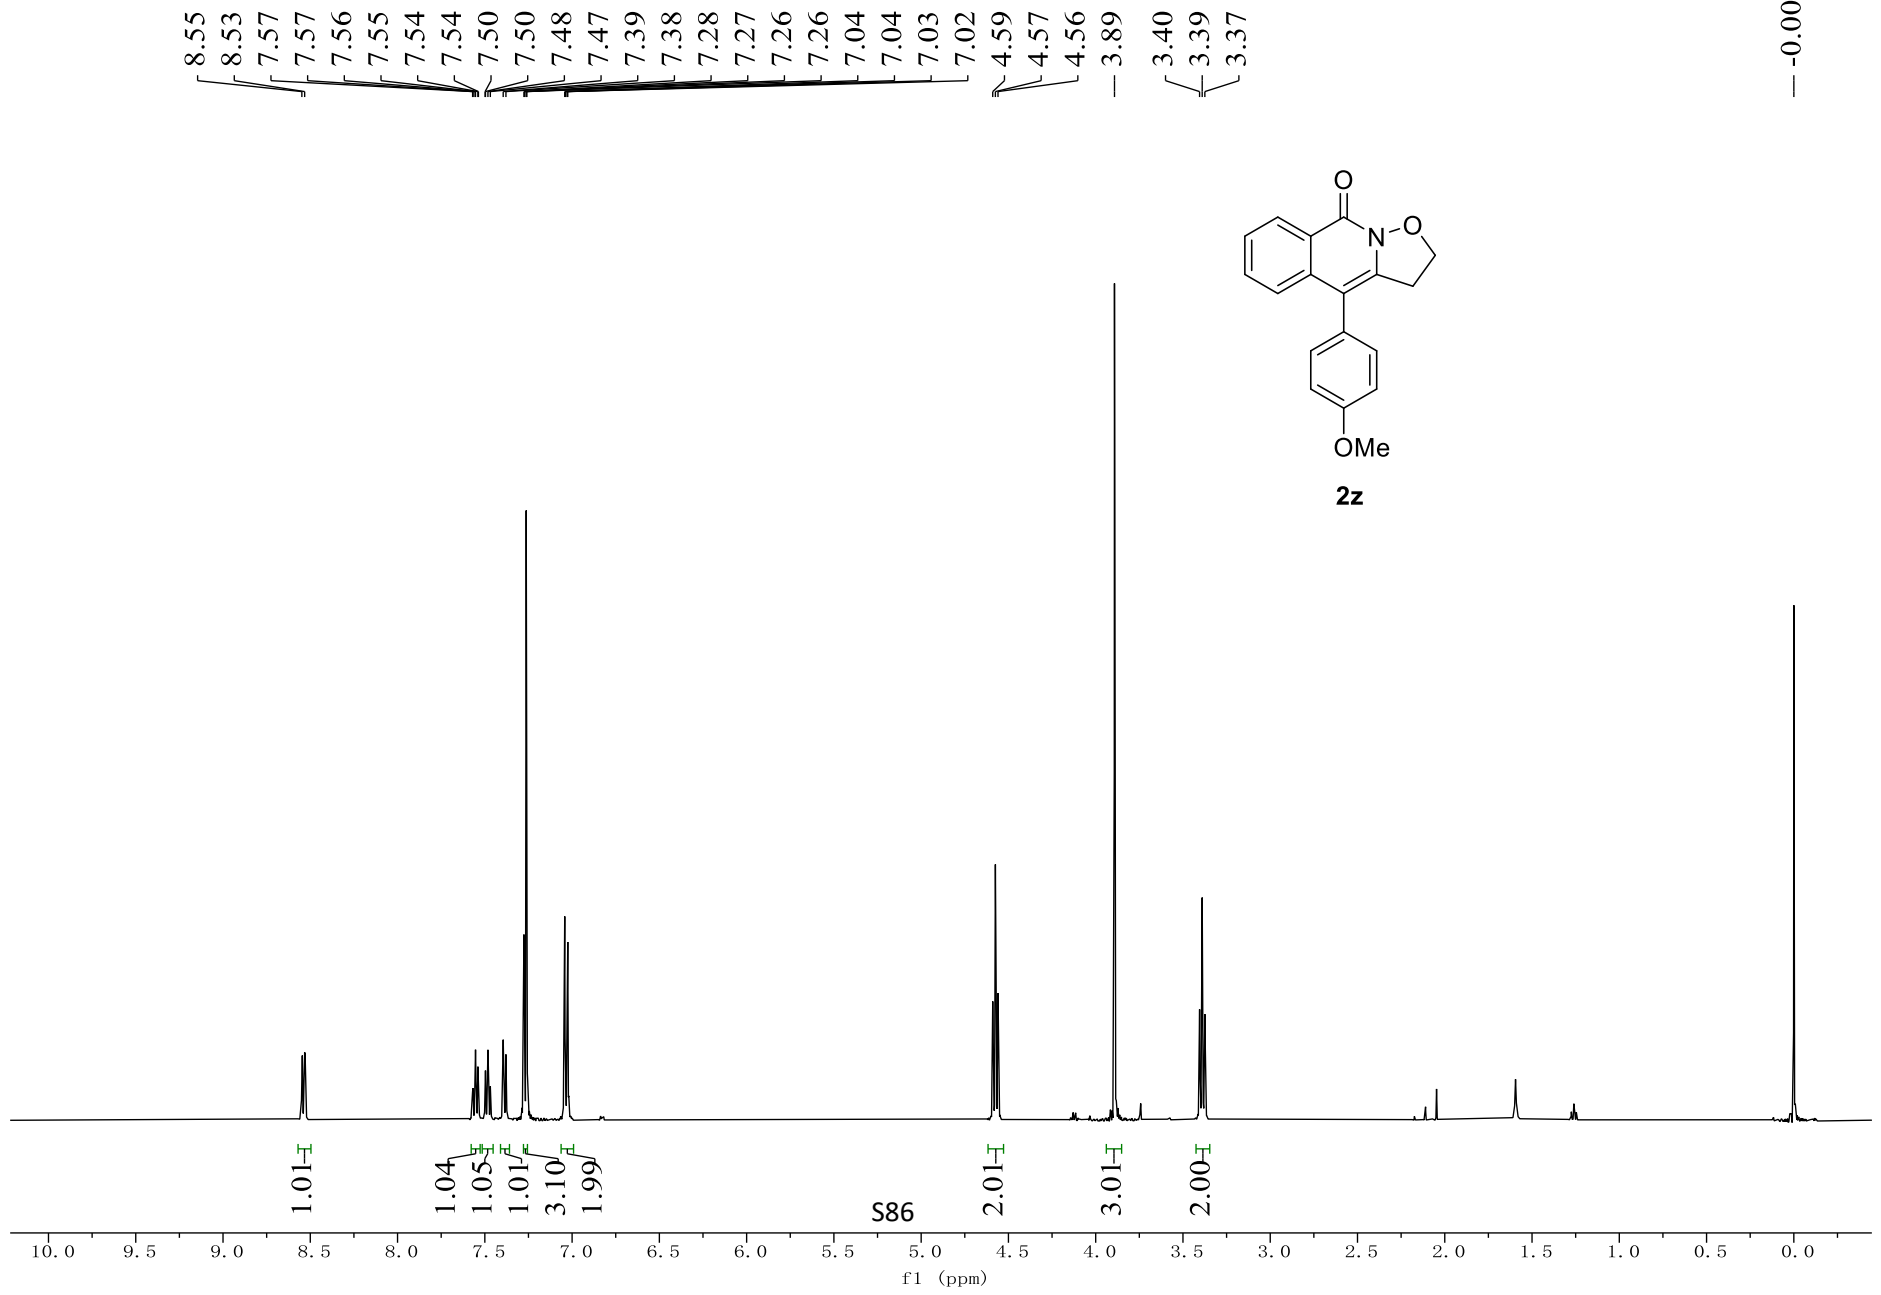

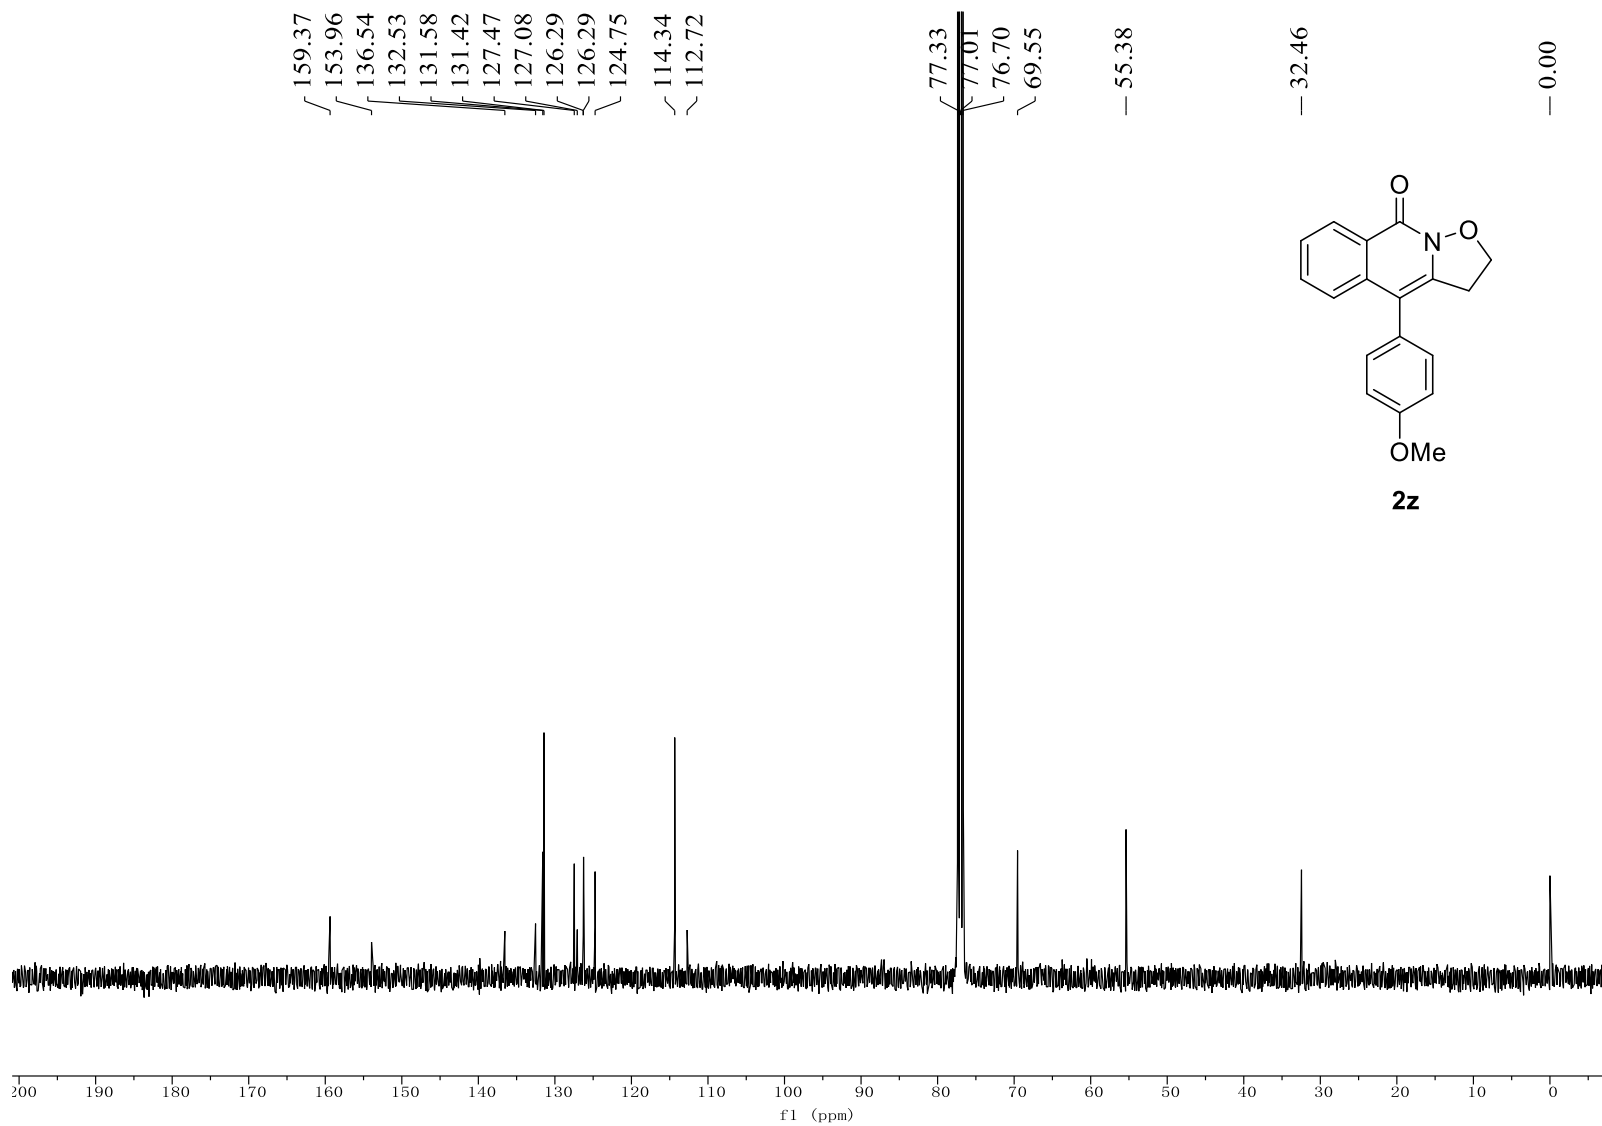



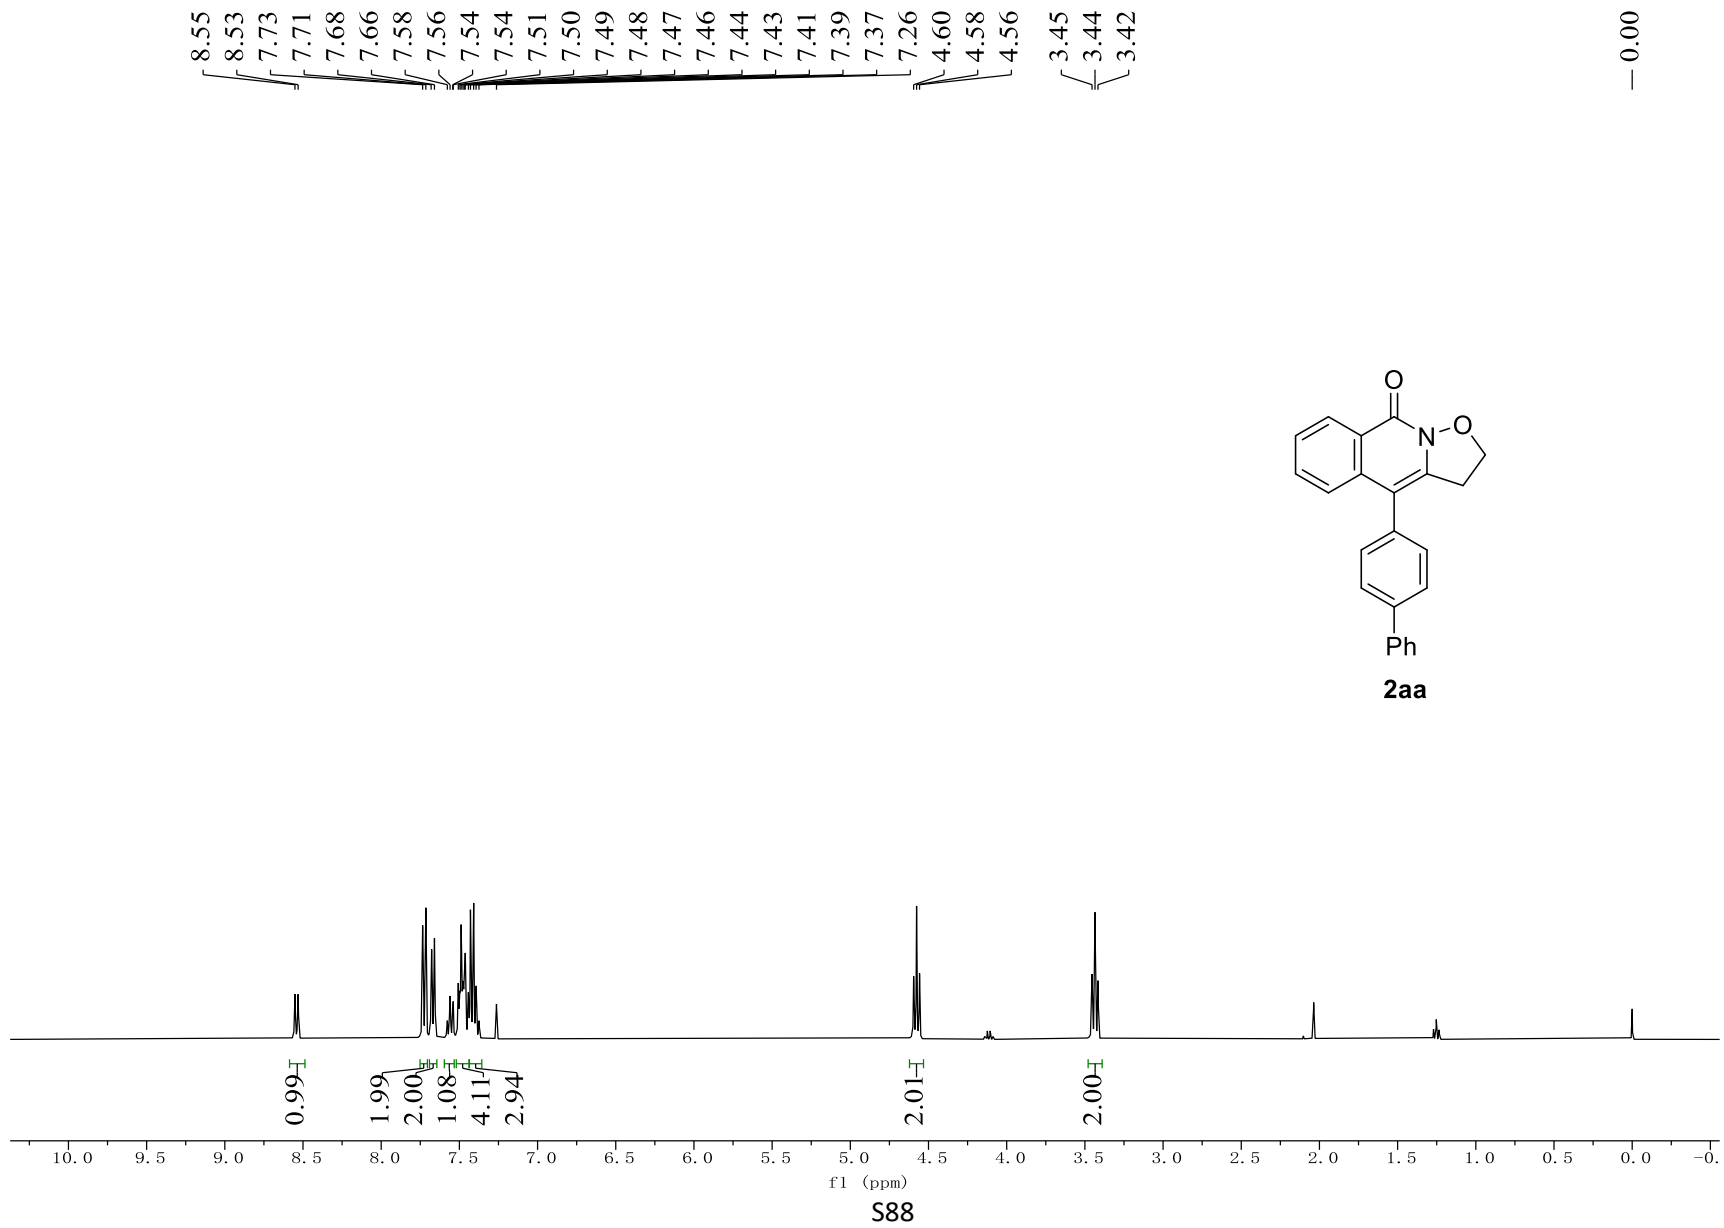

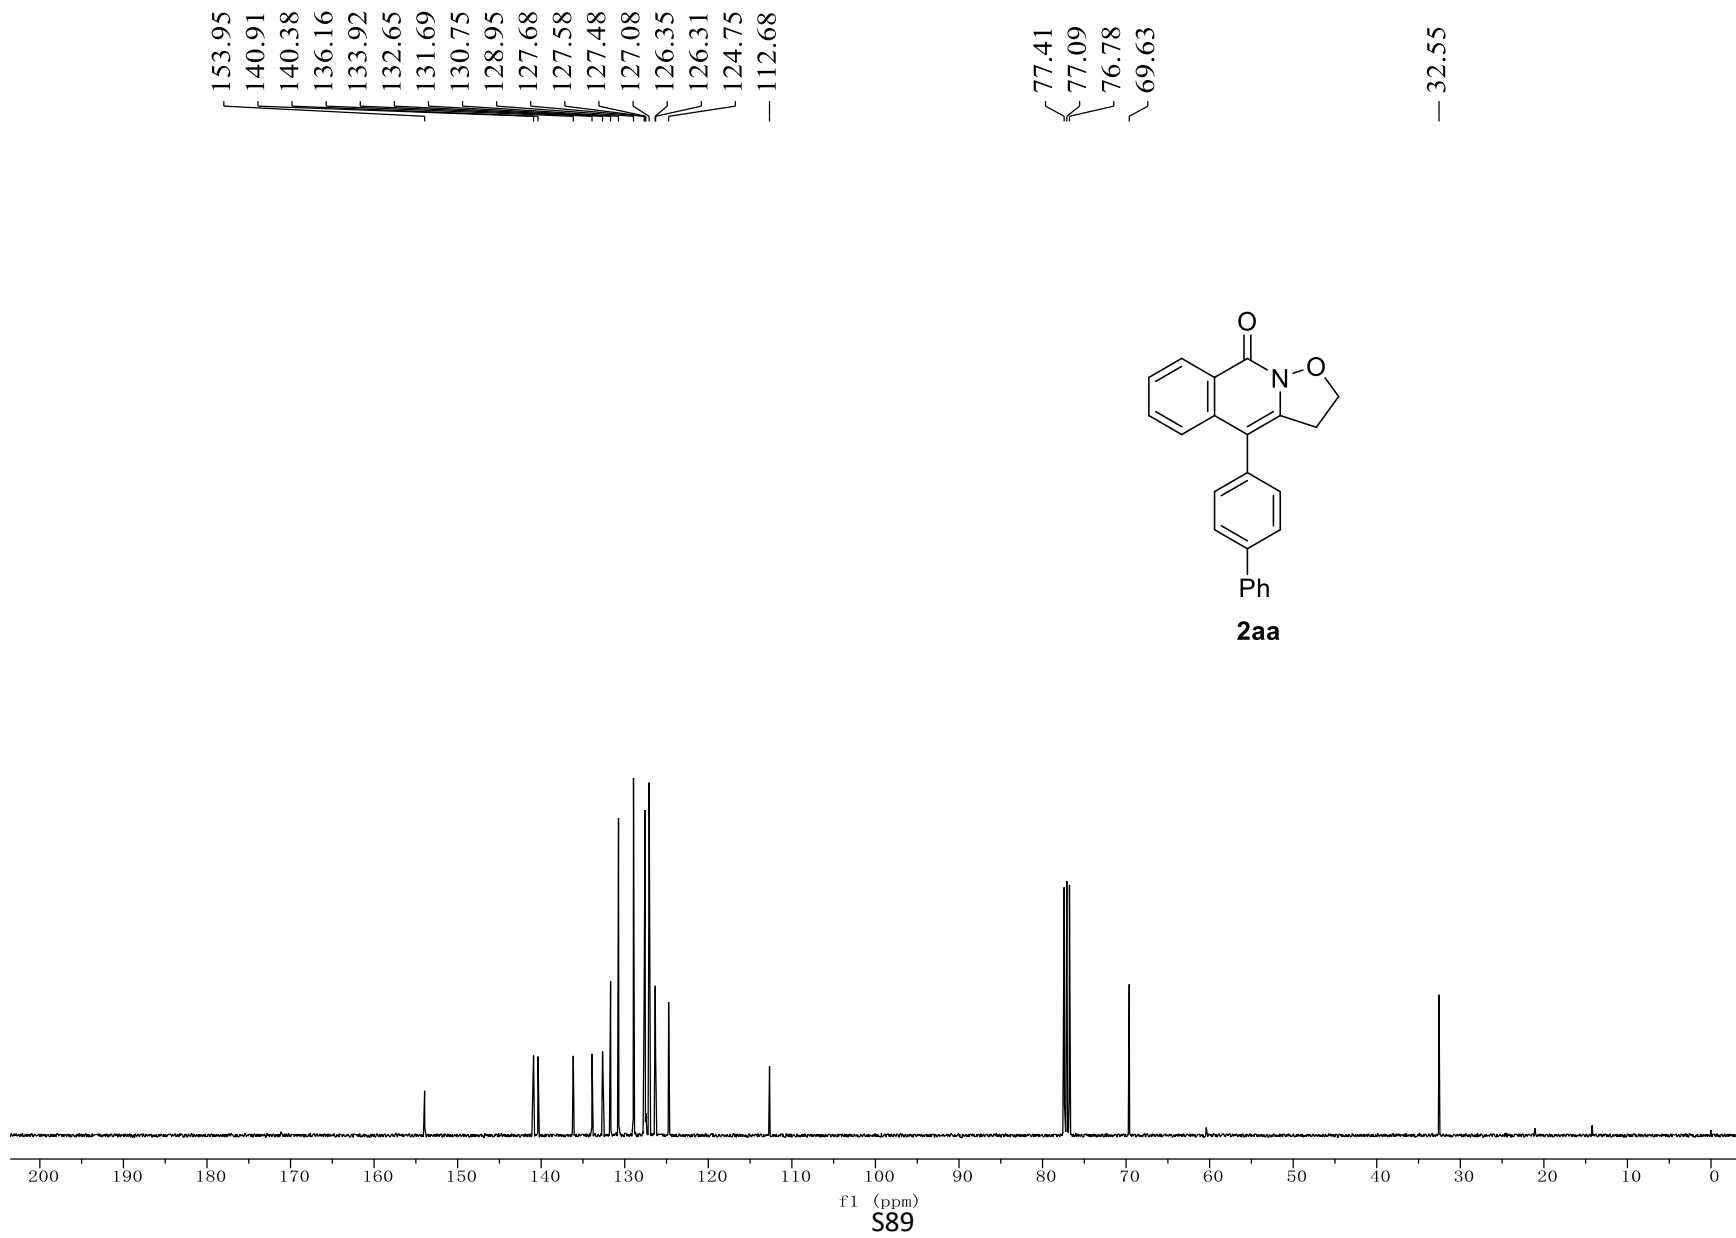

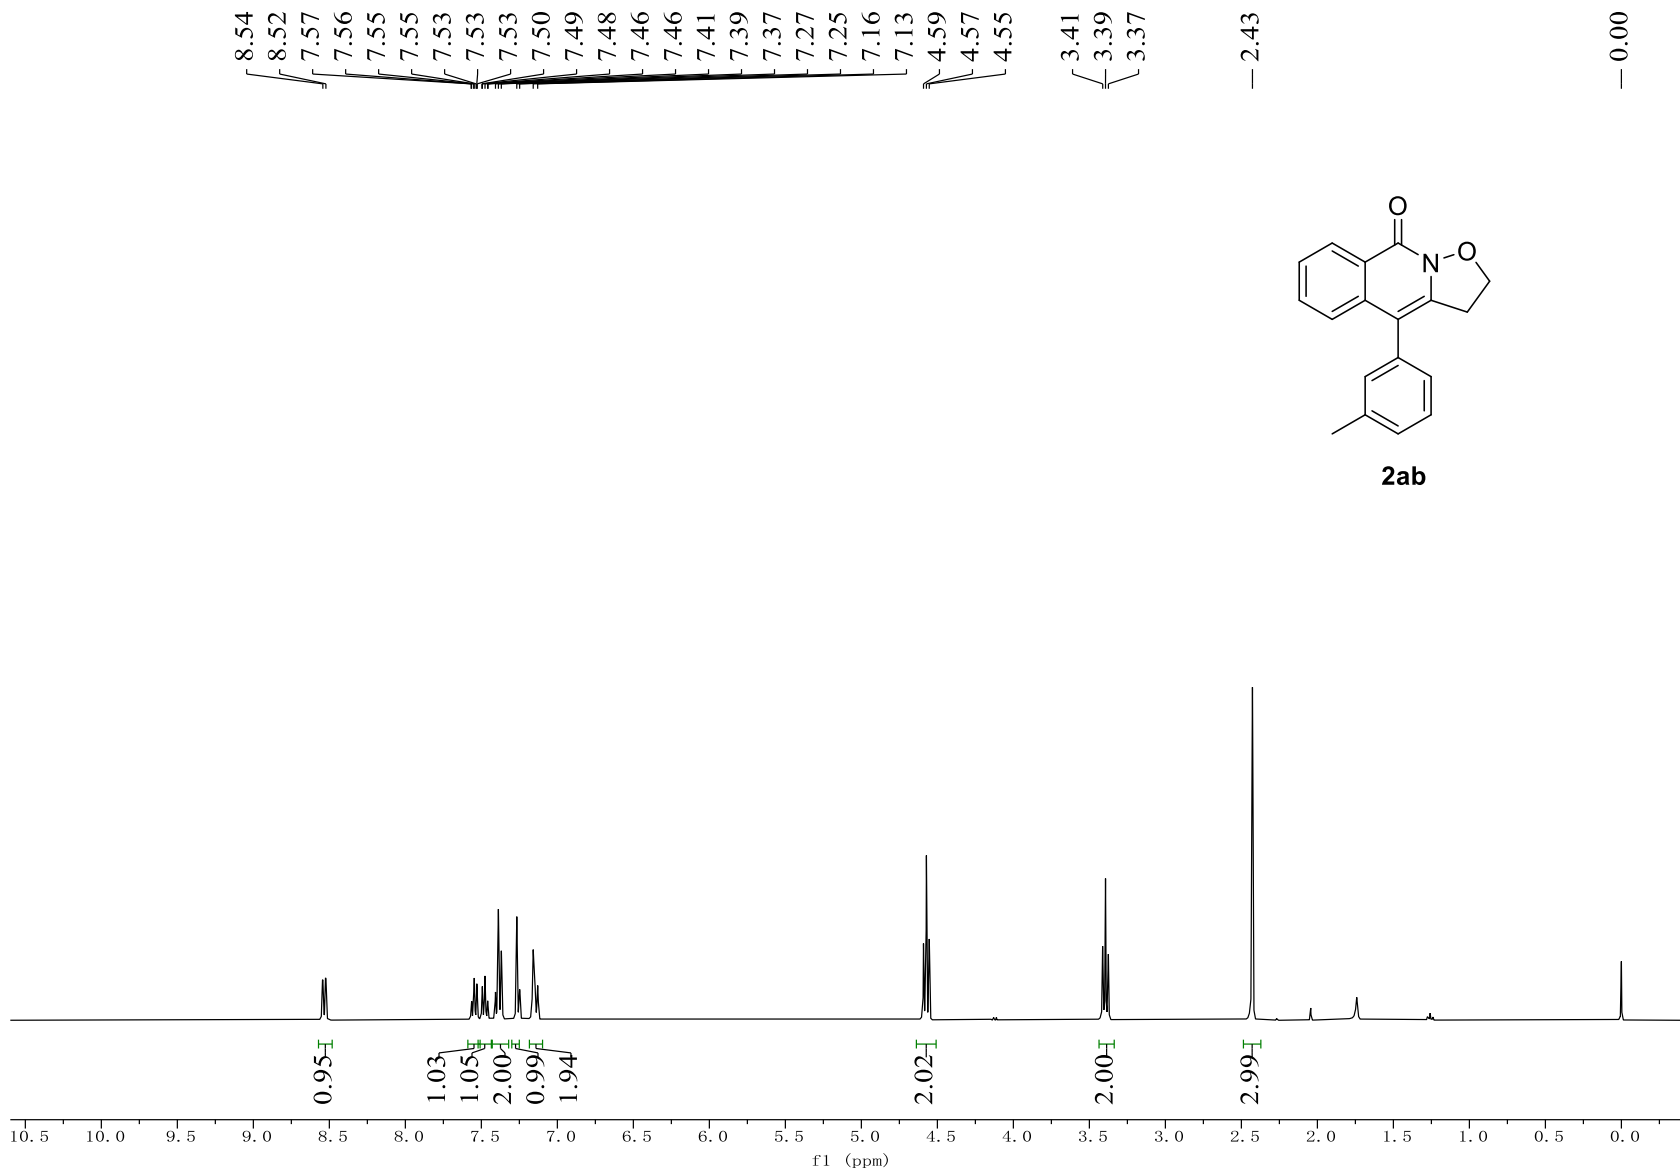

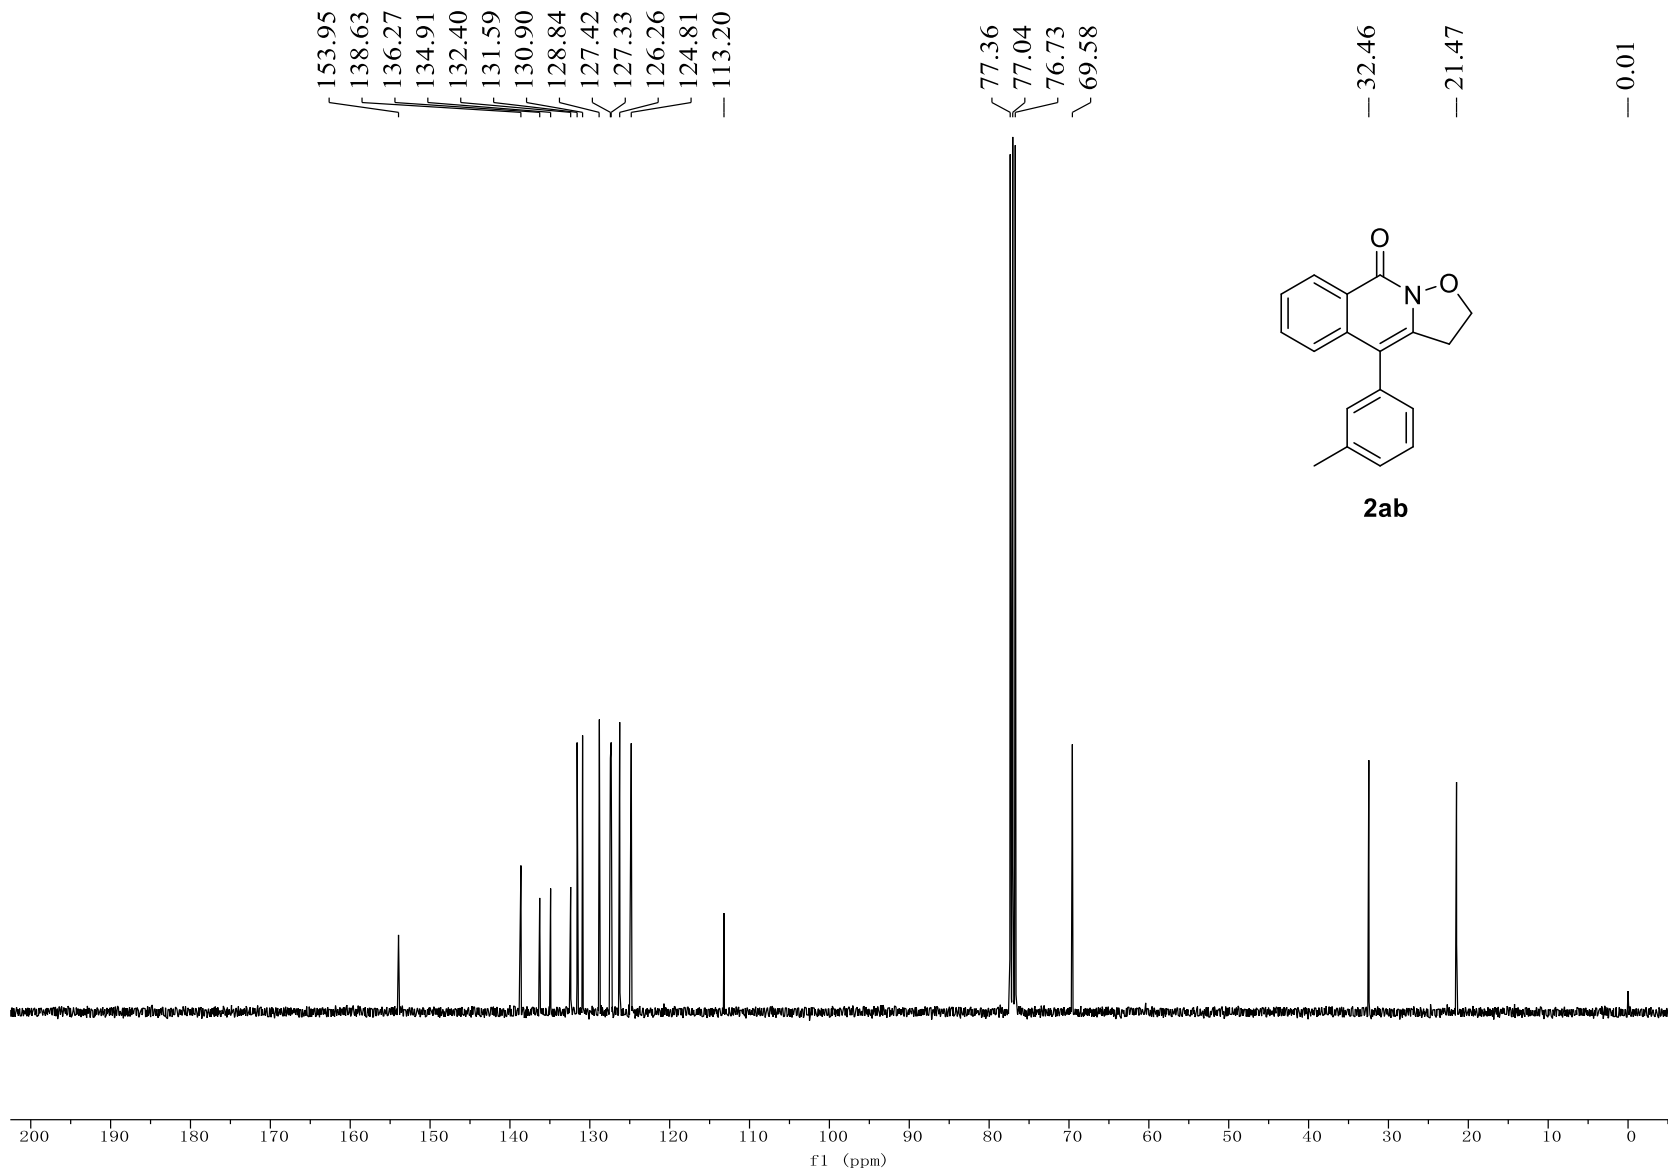

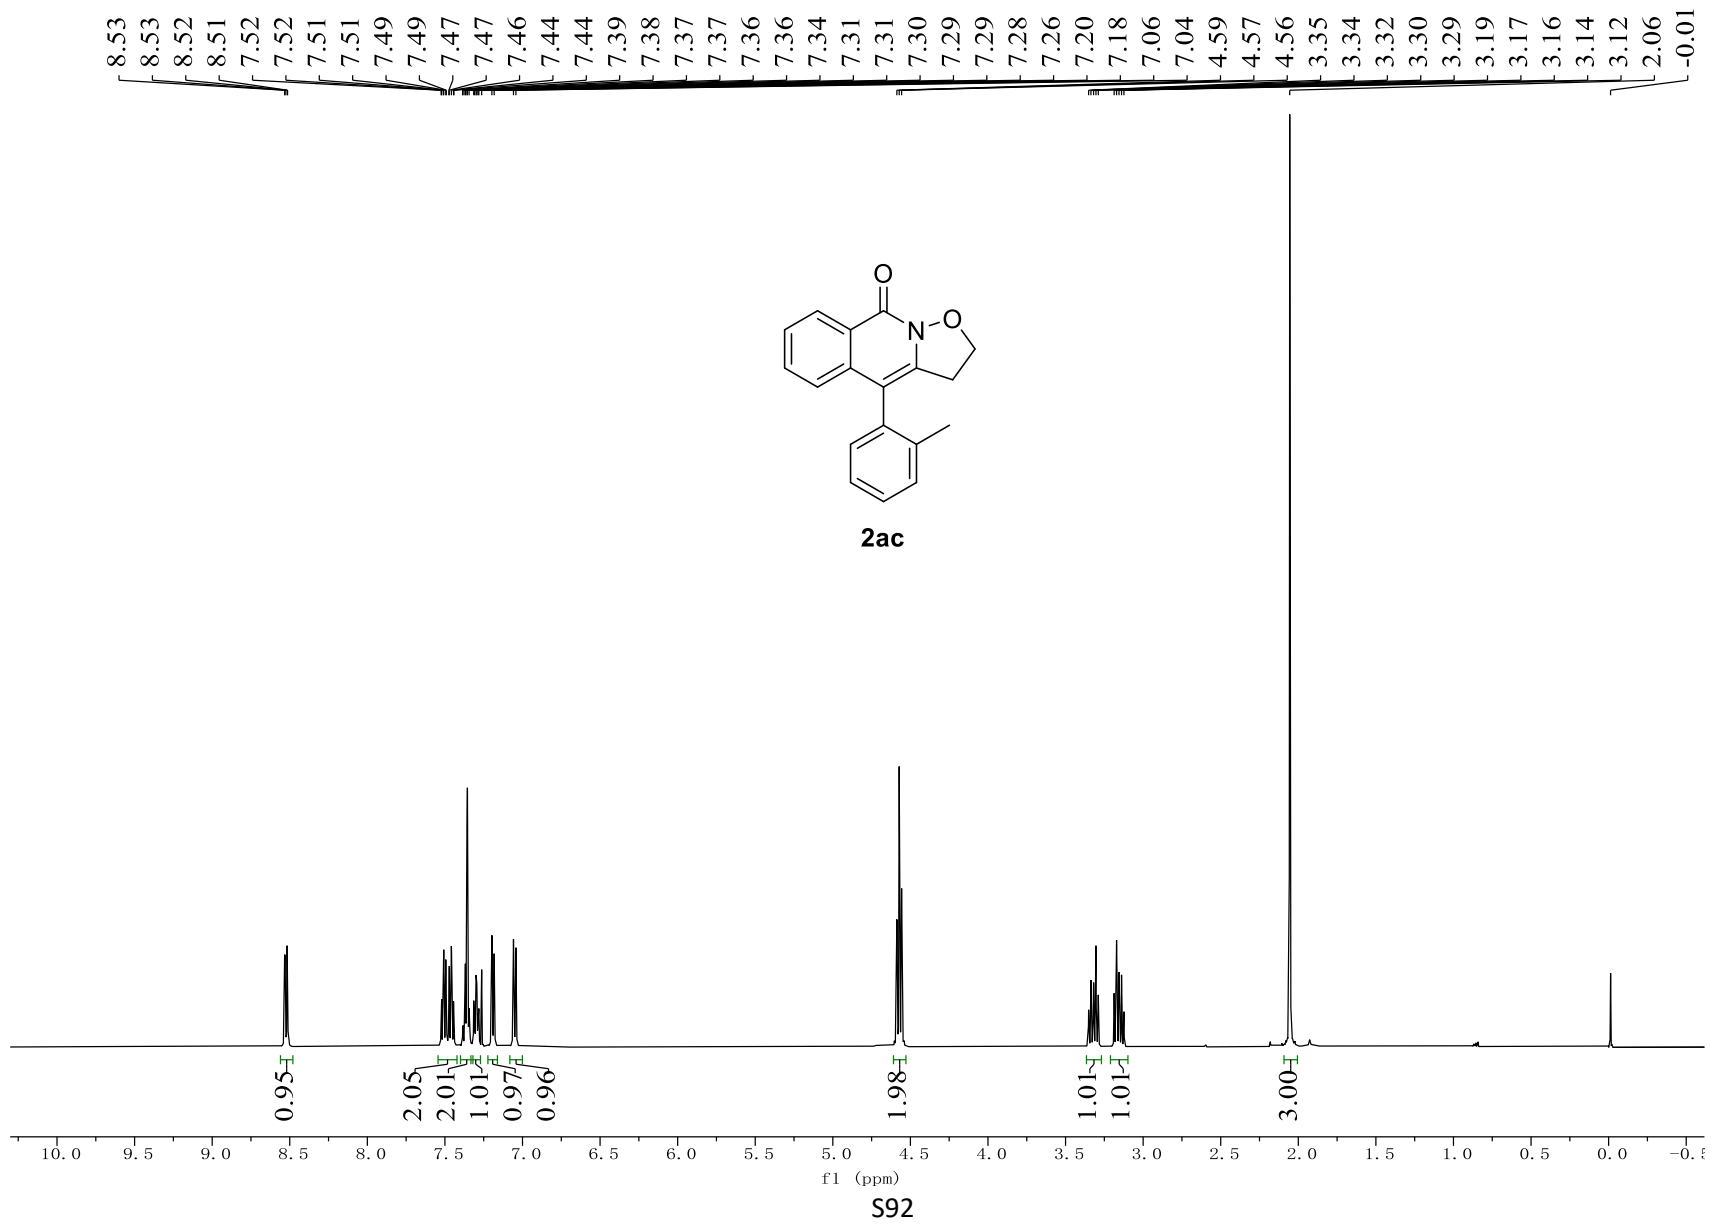

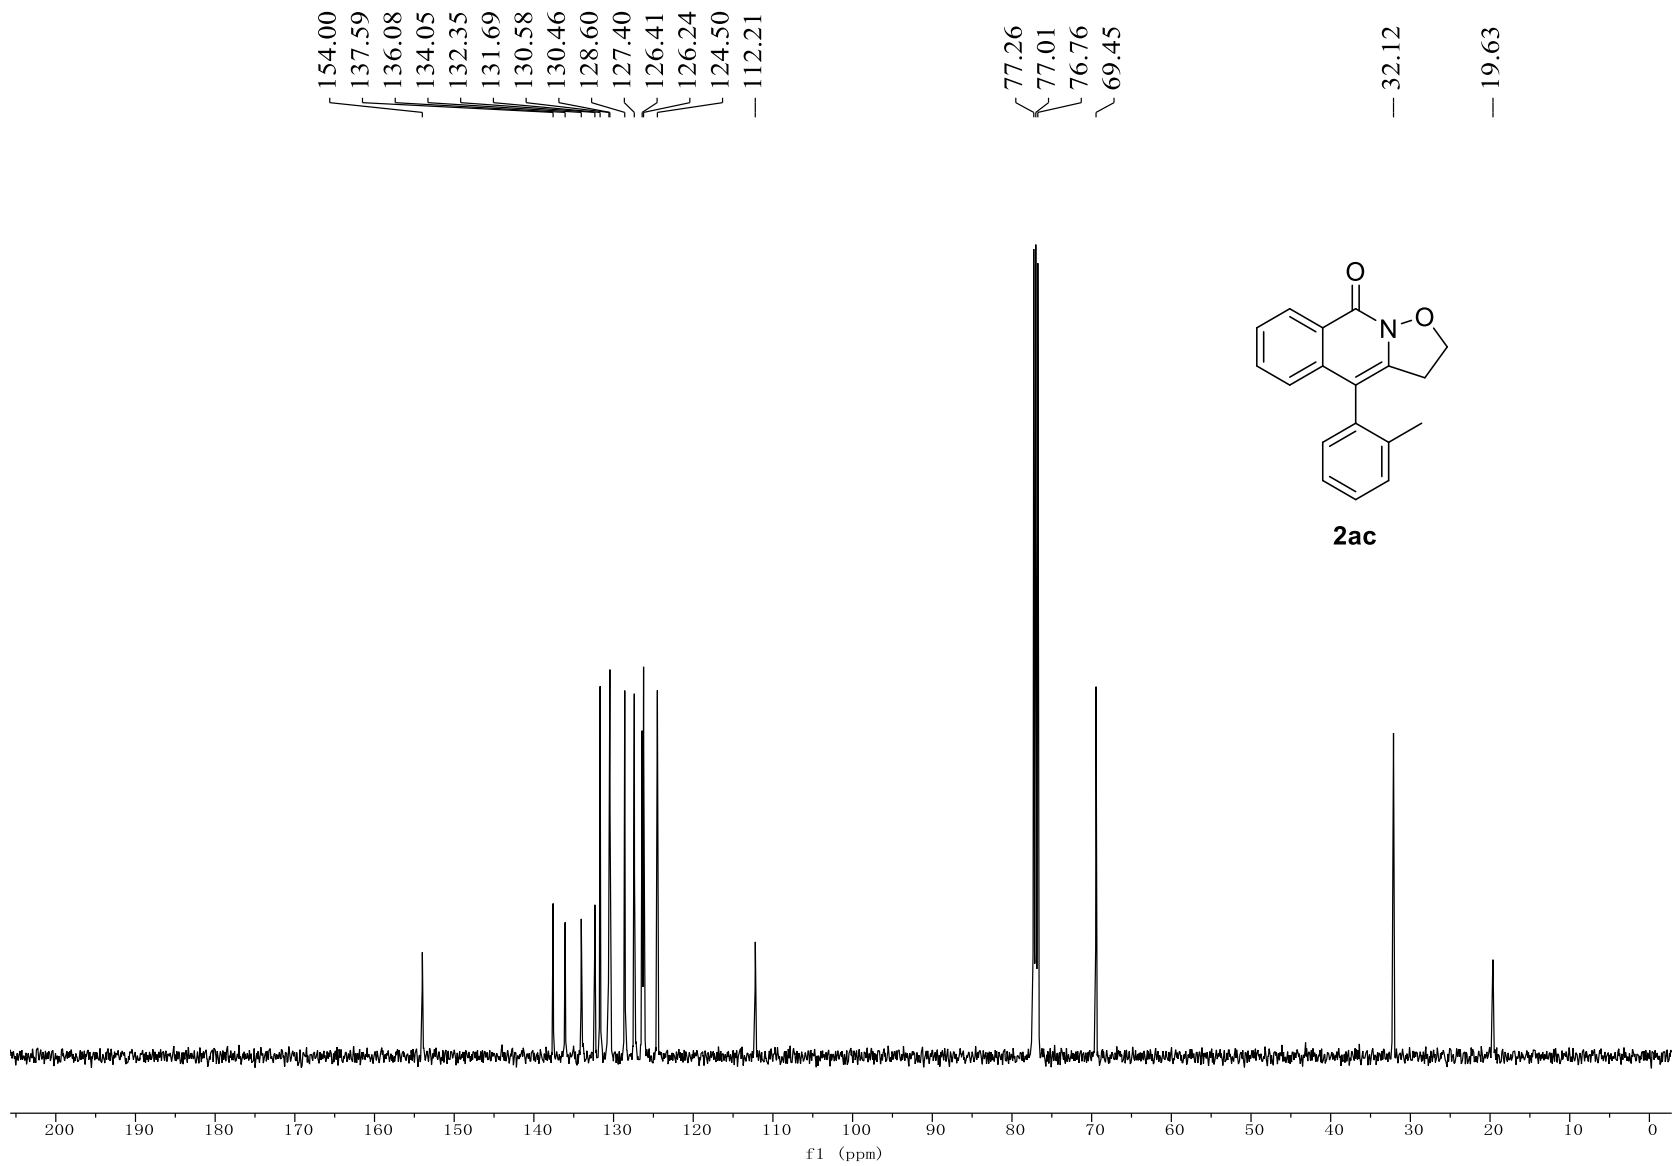

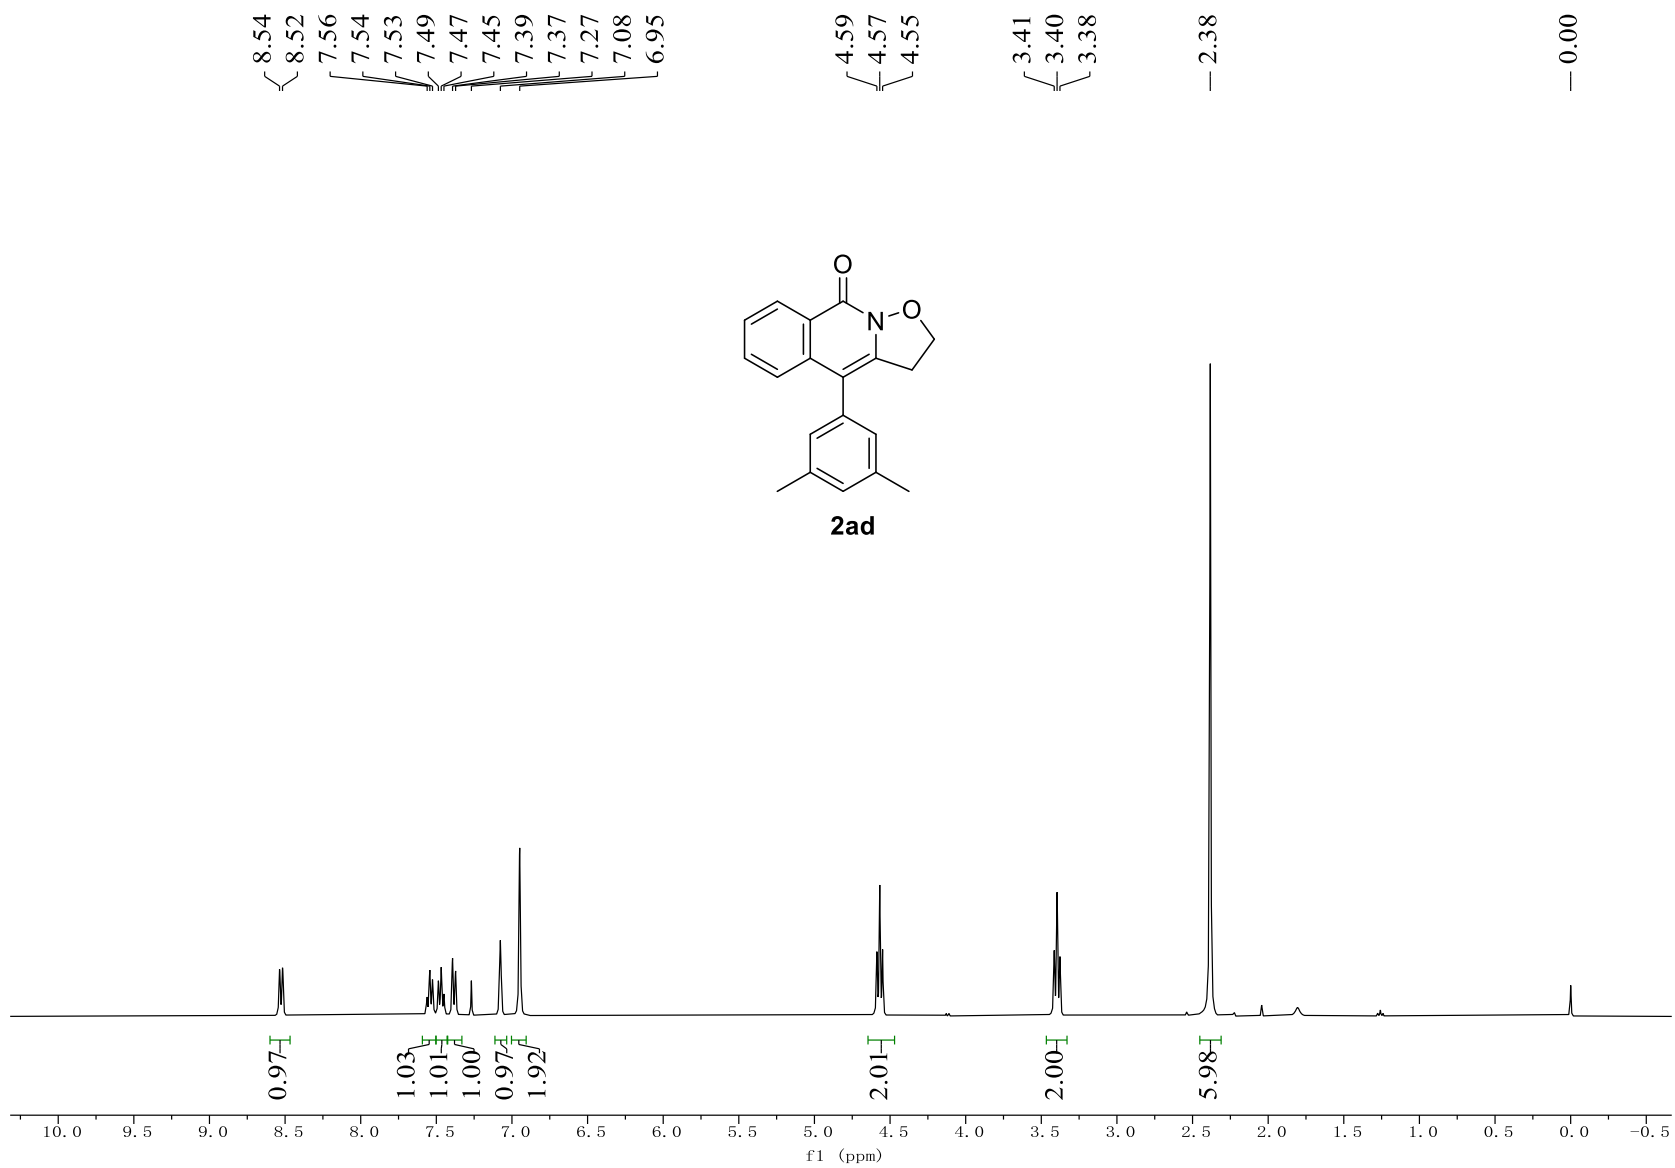

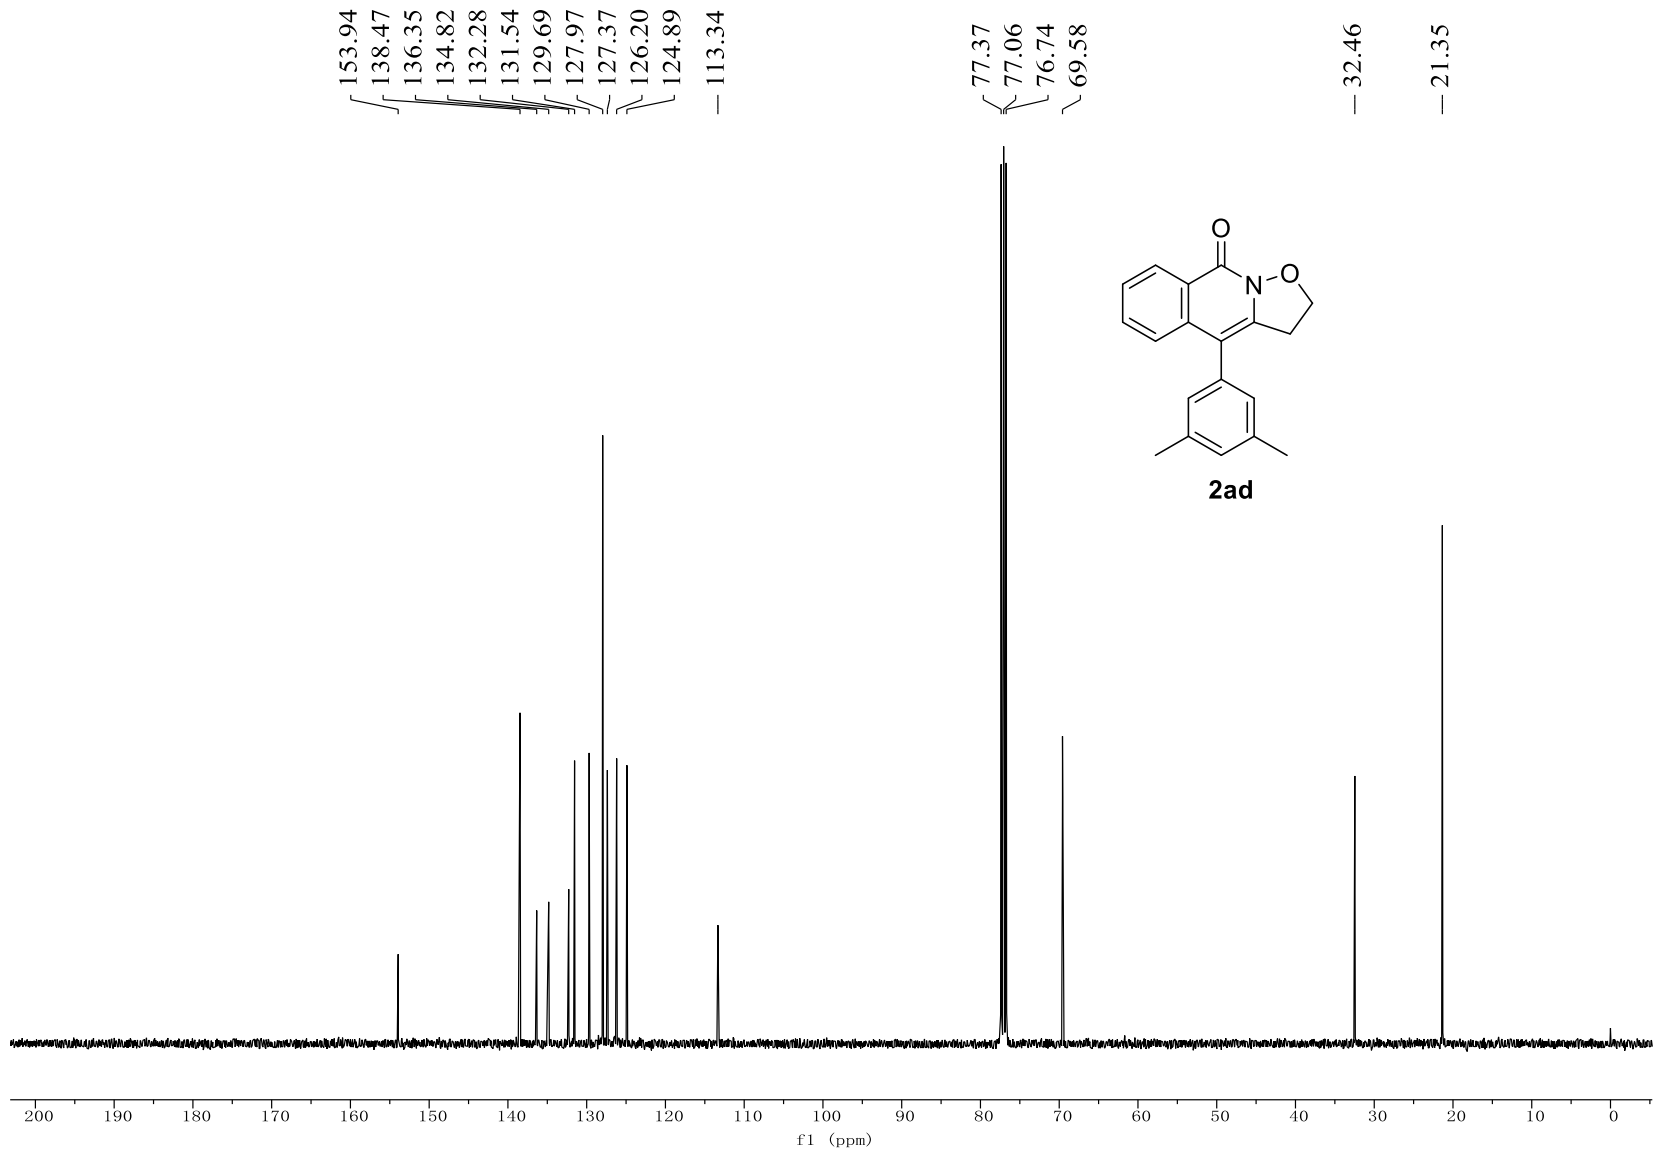



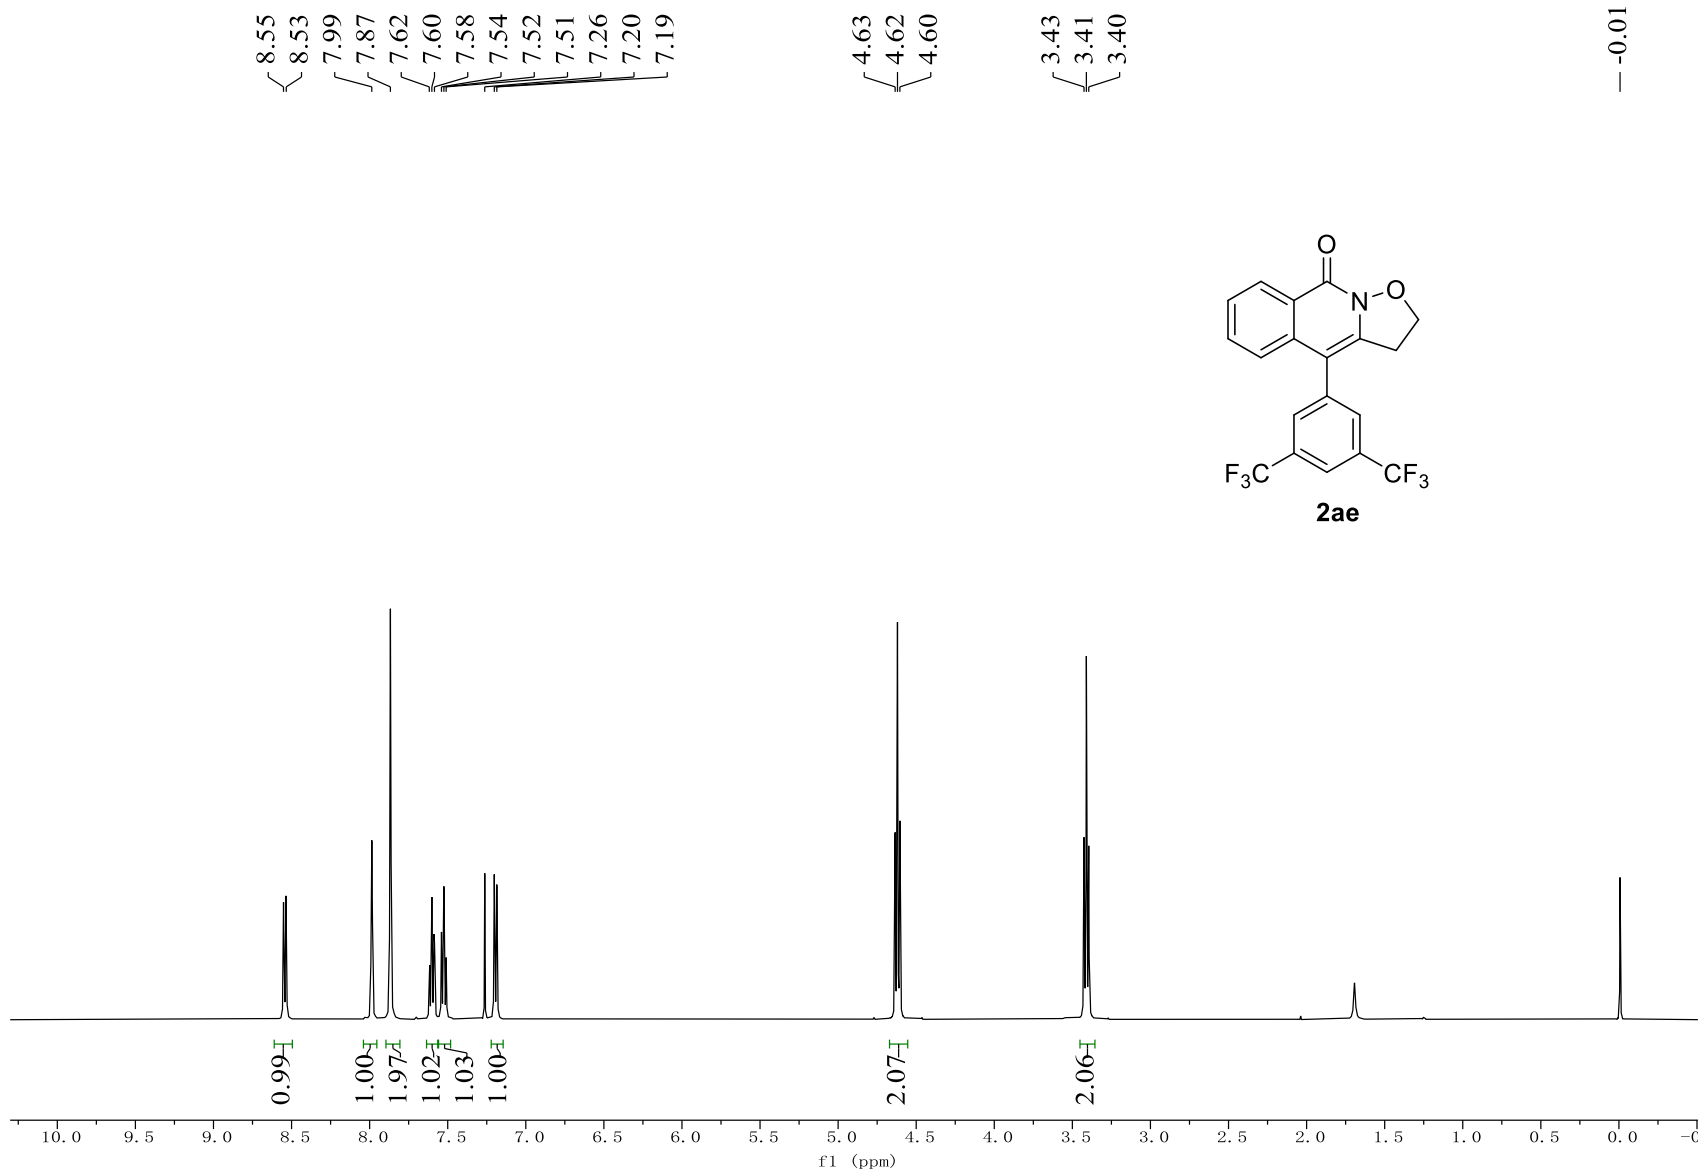

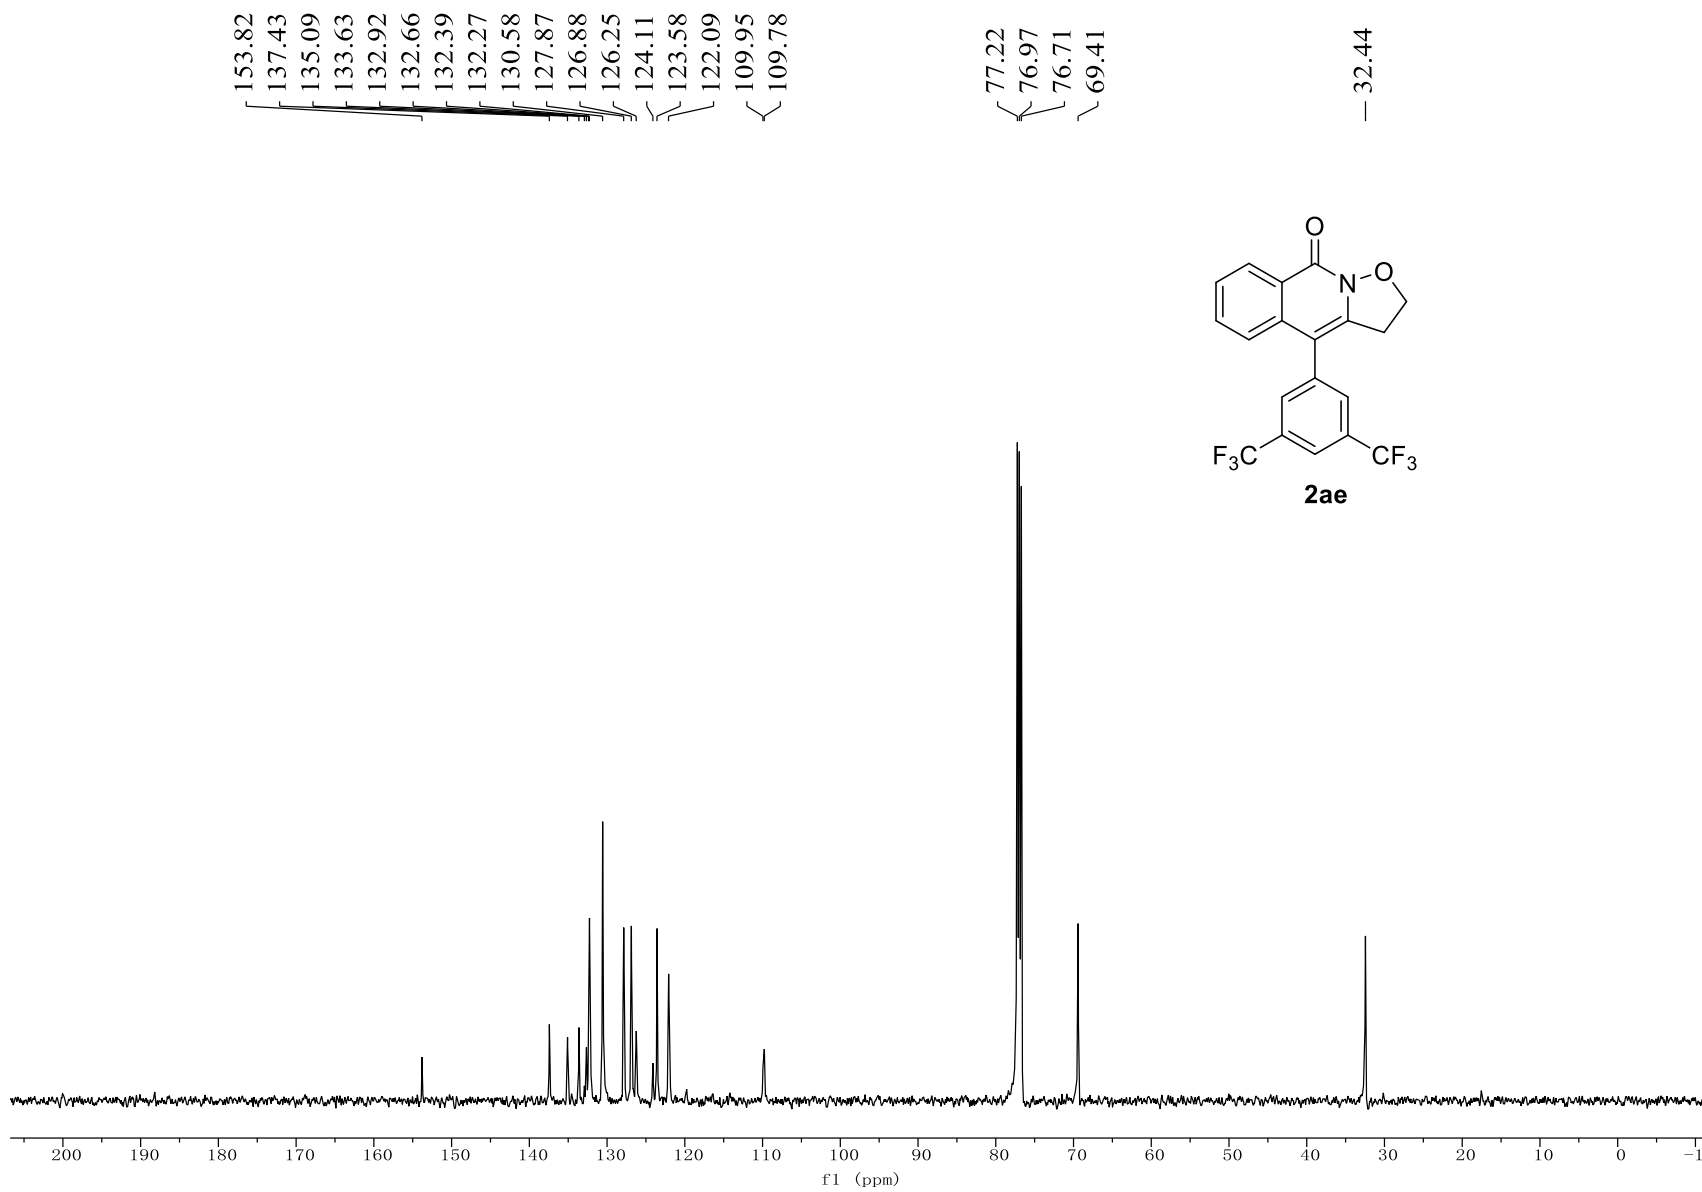

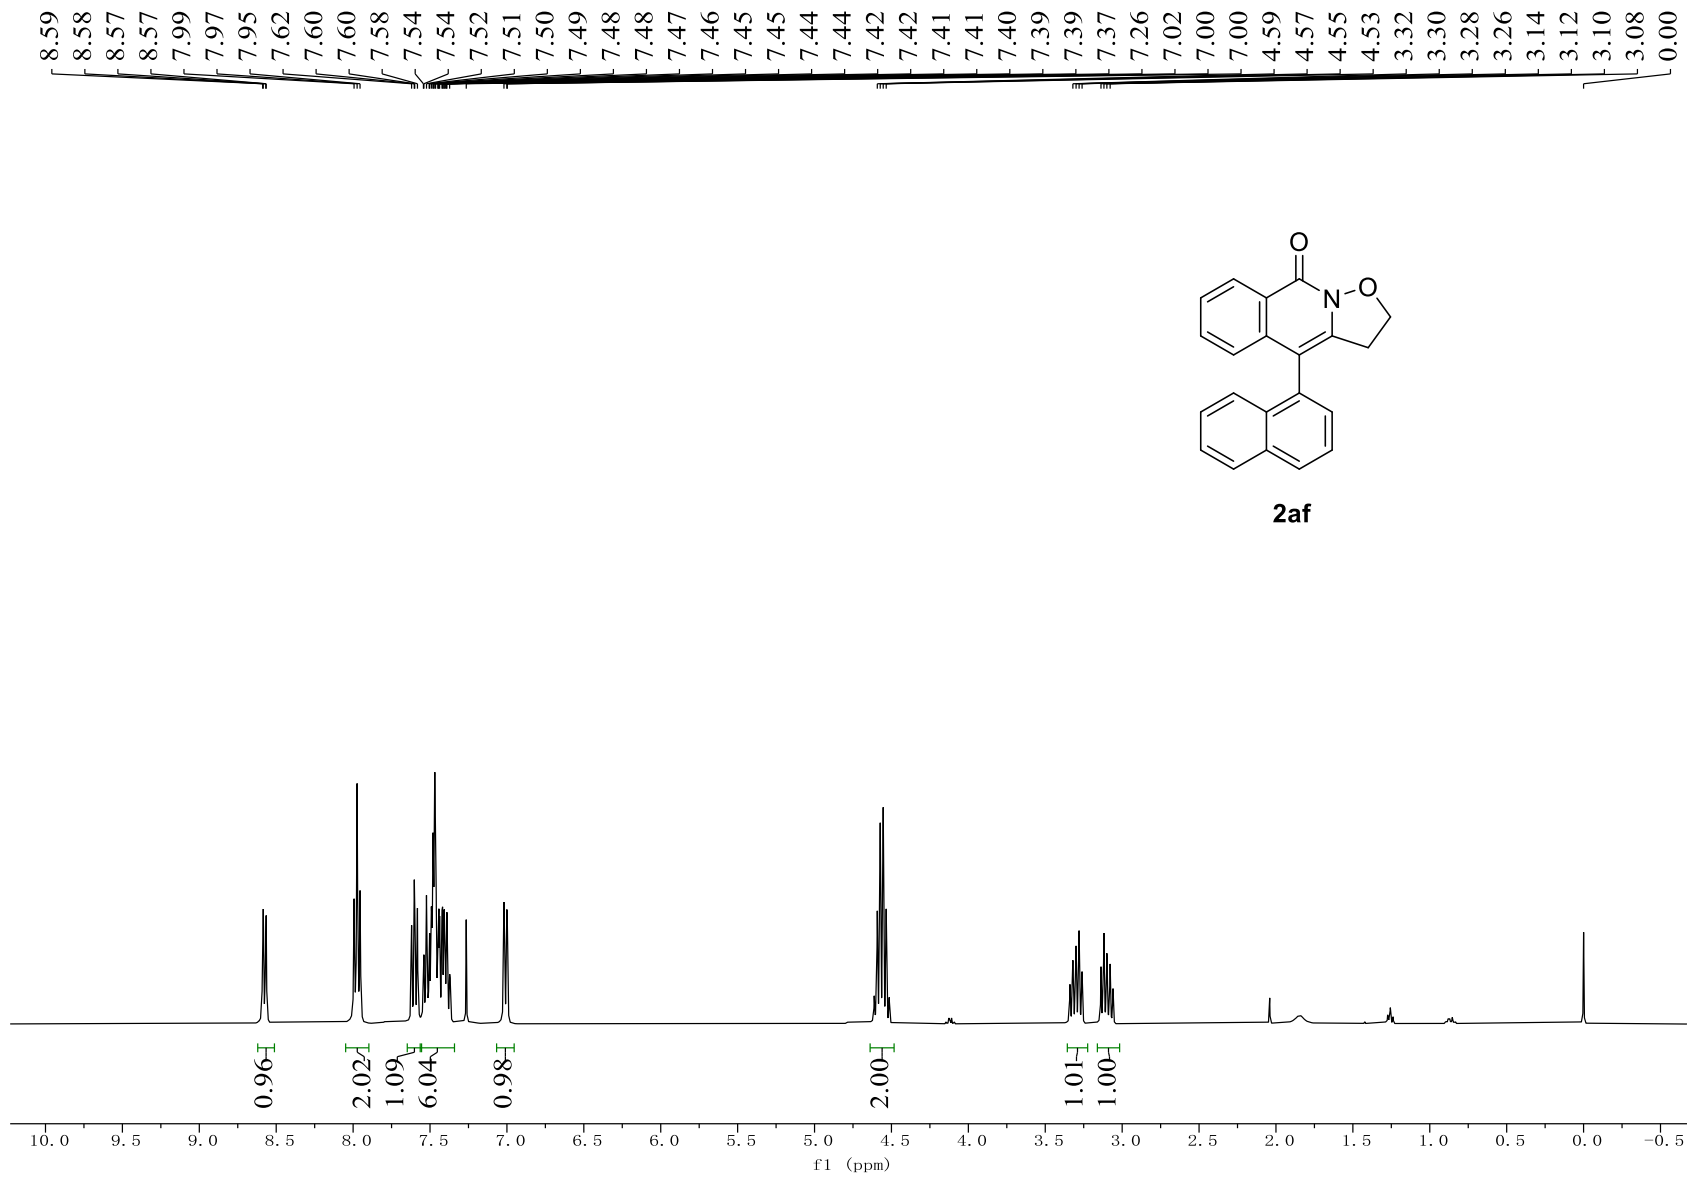

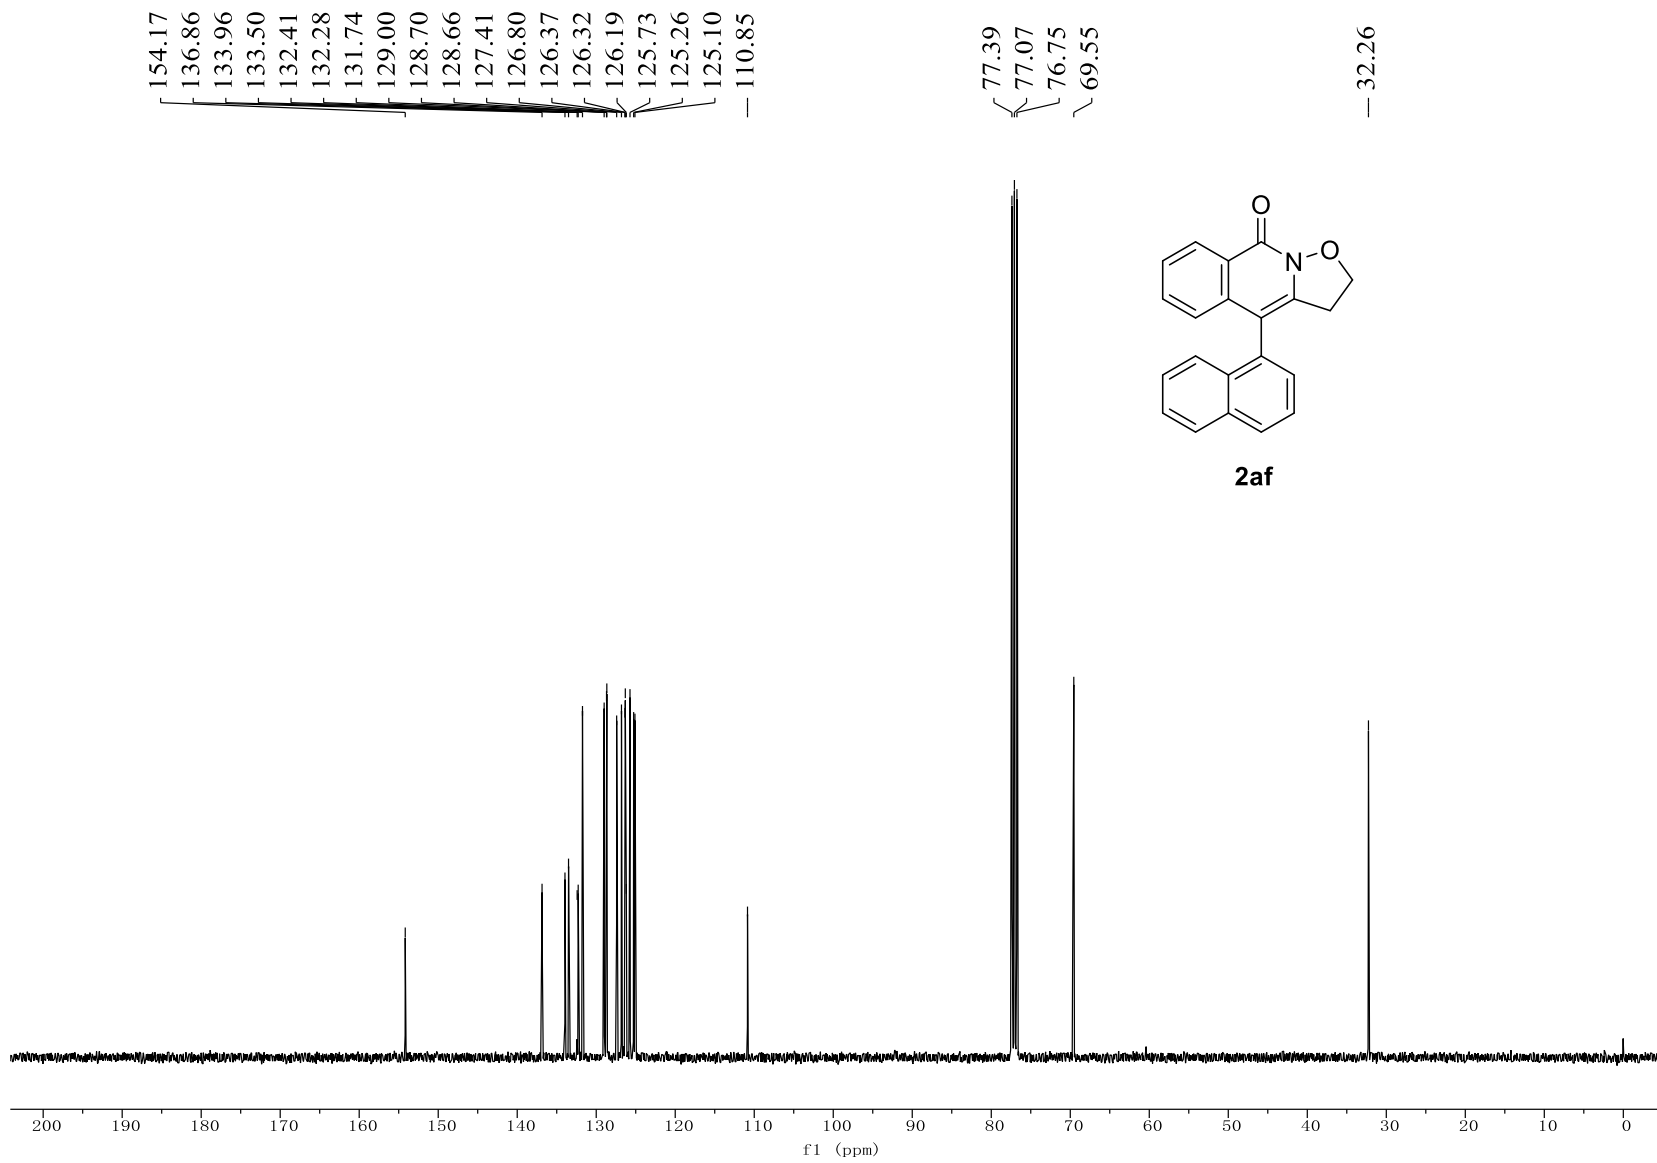

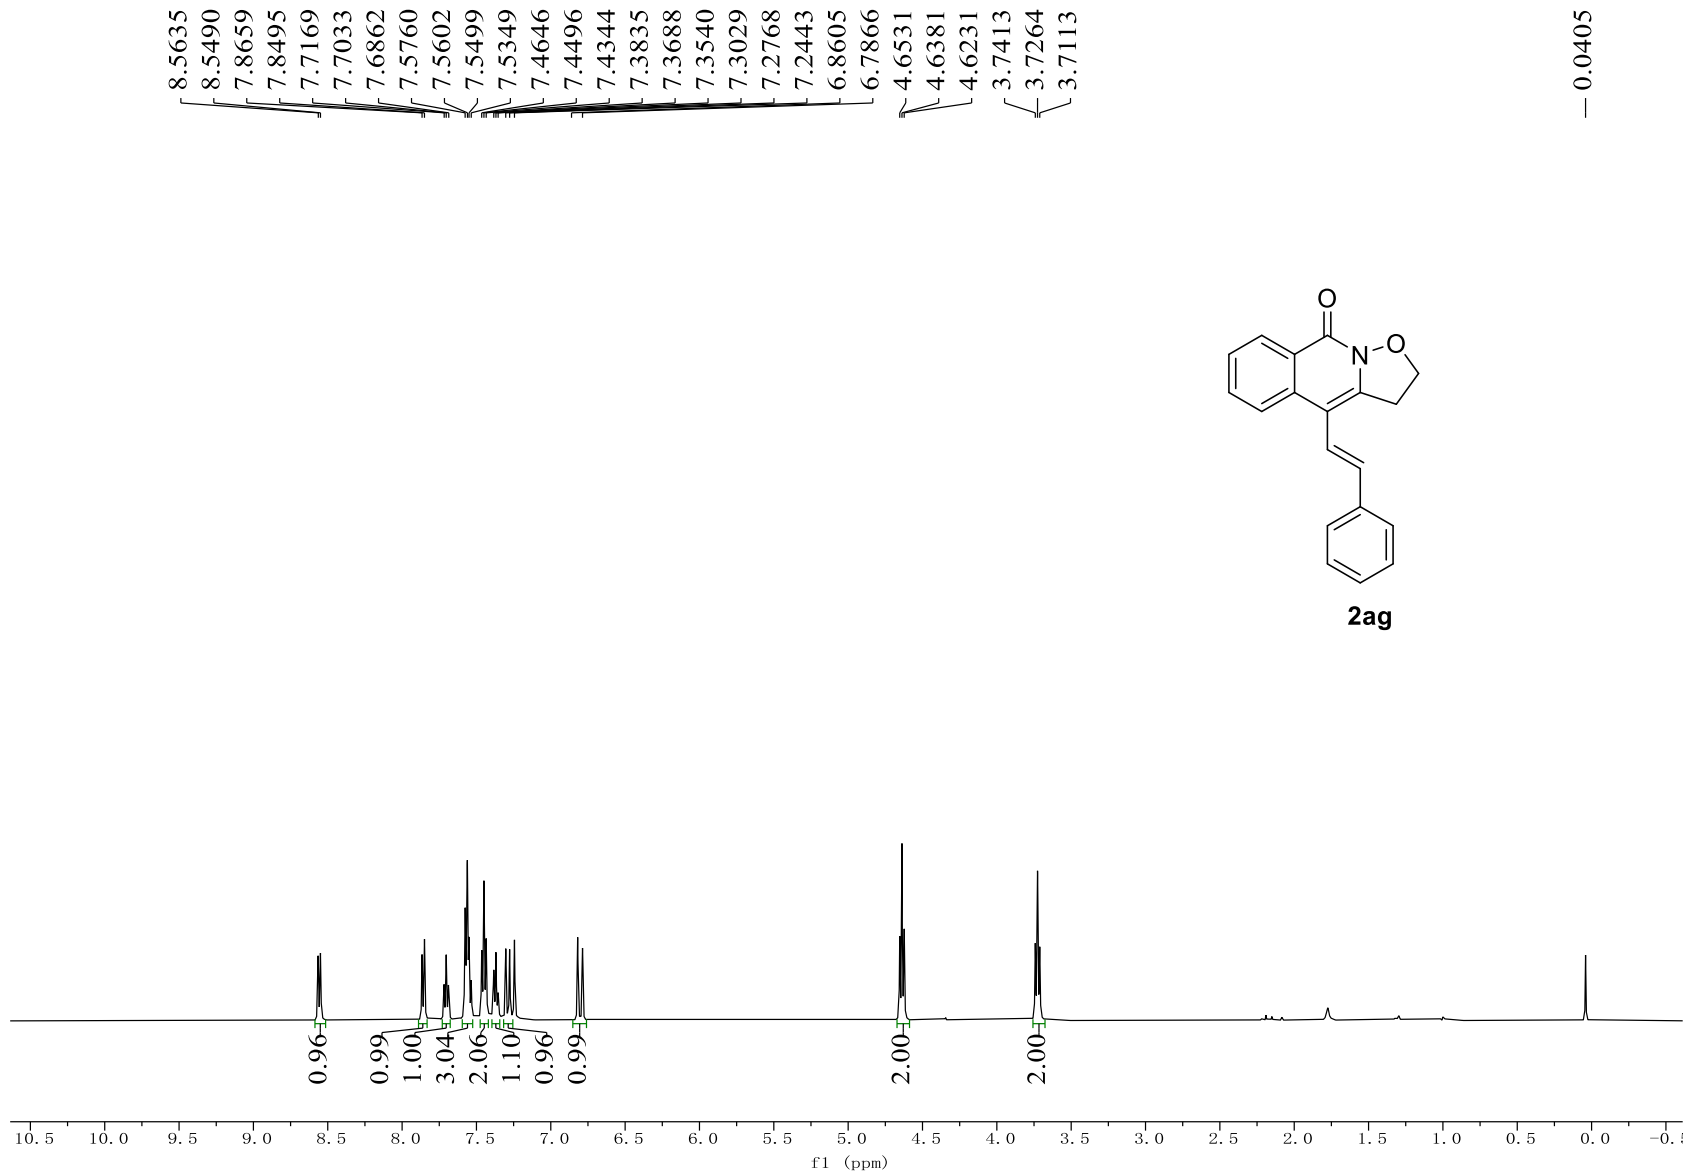

S100

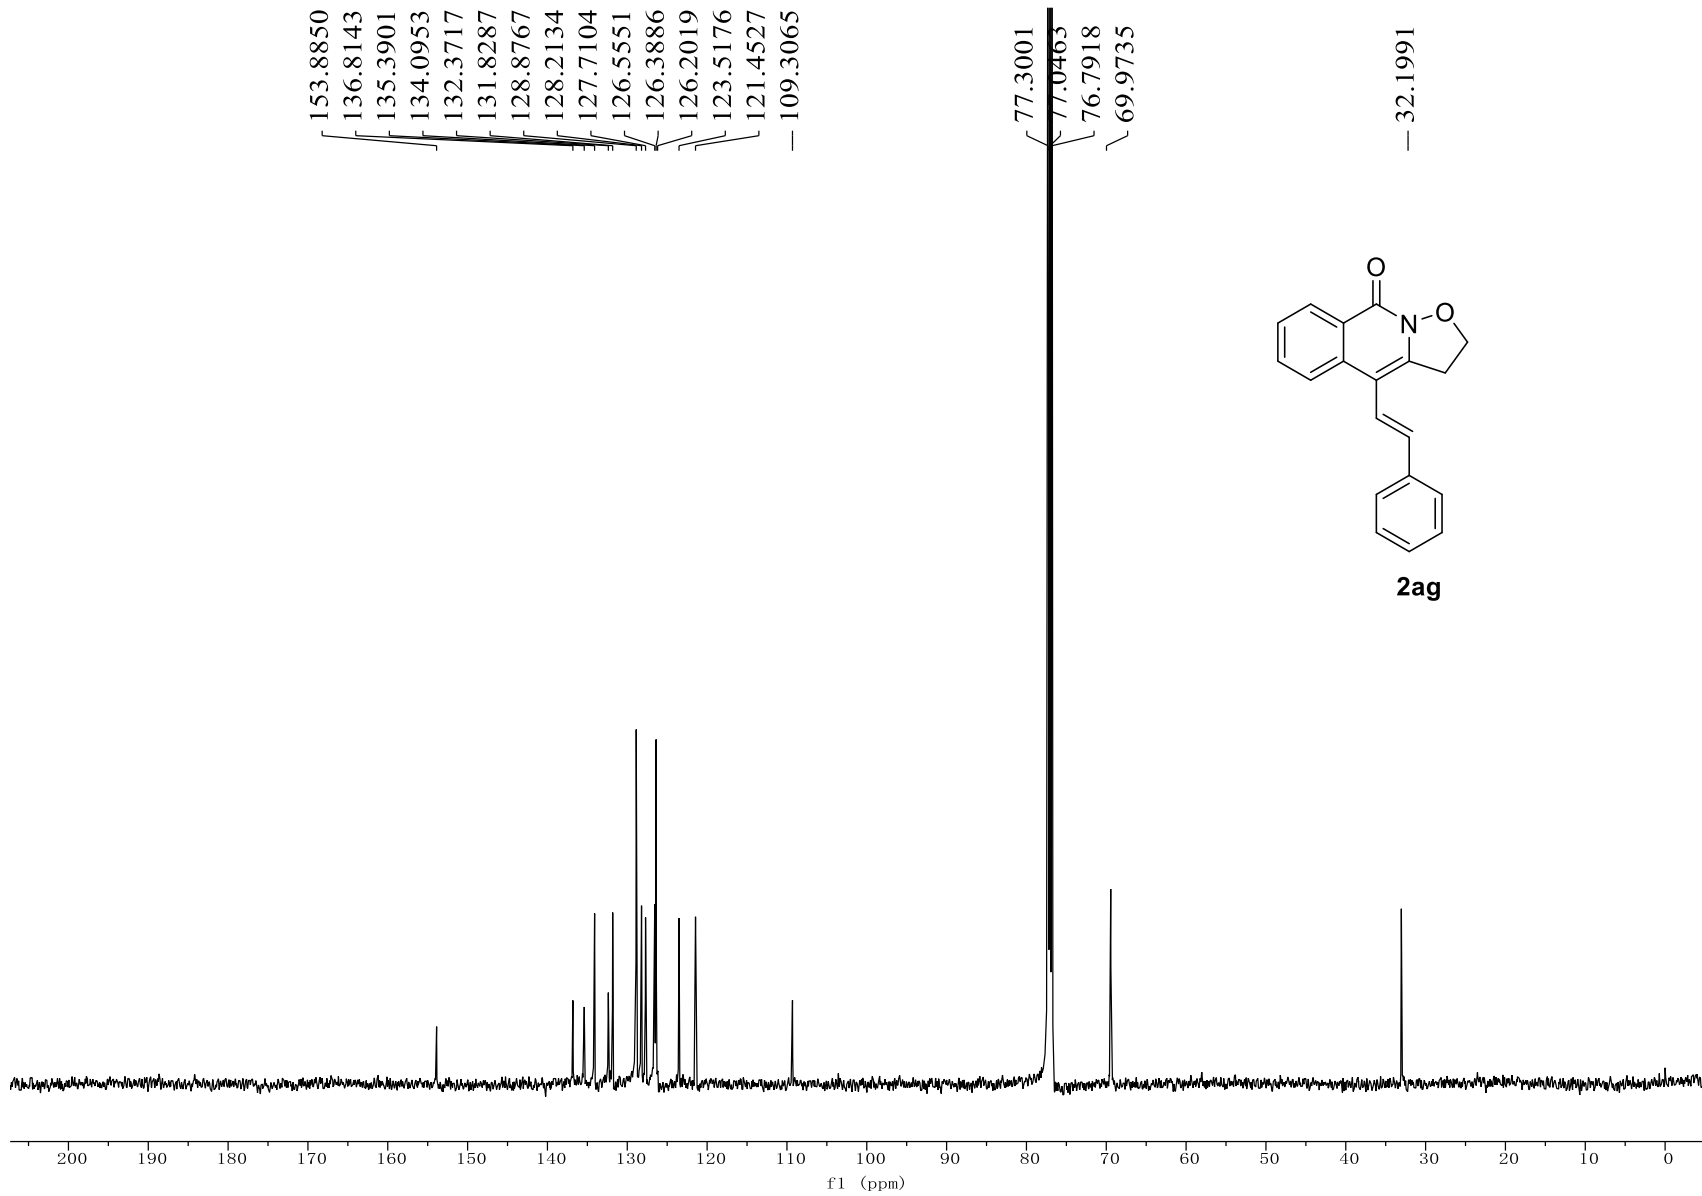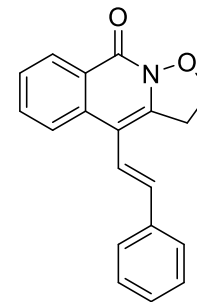

2ag

S101

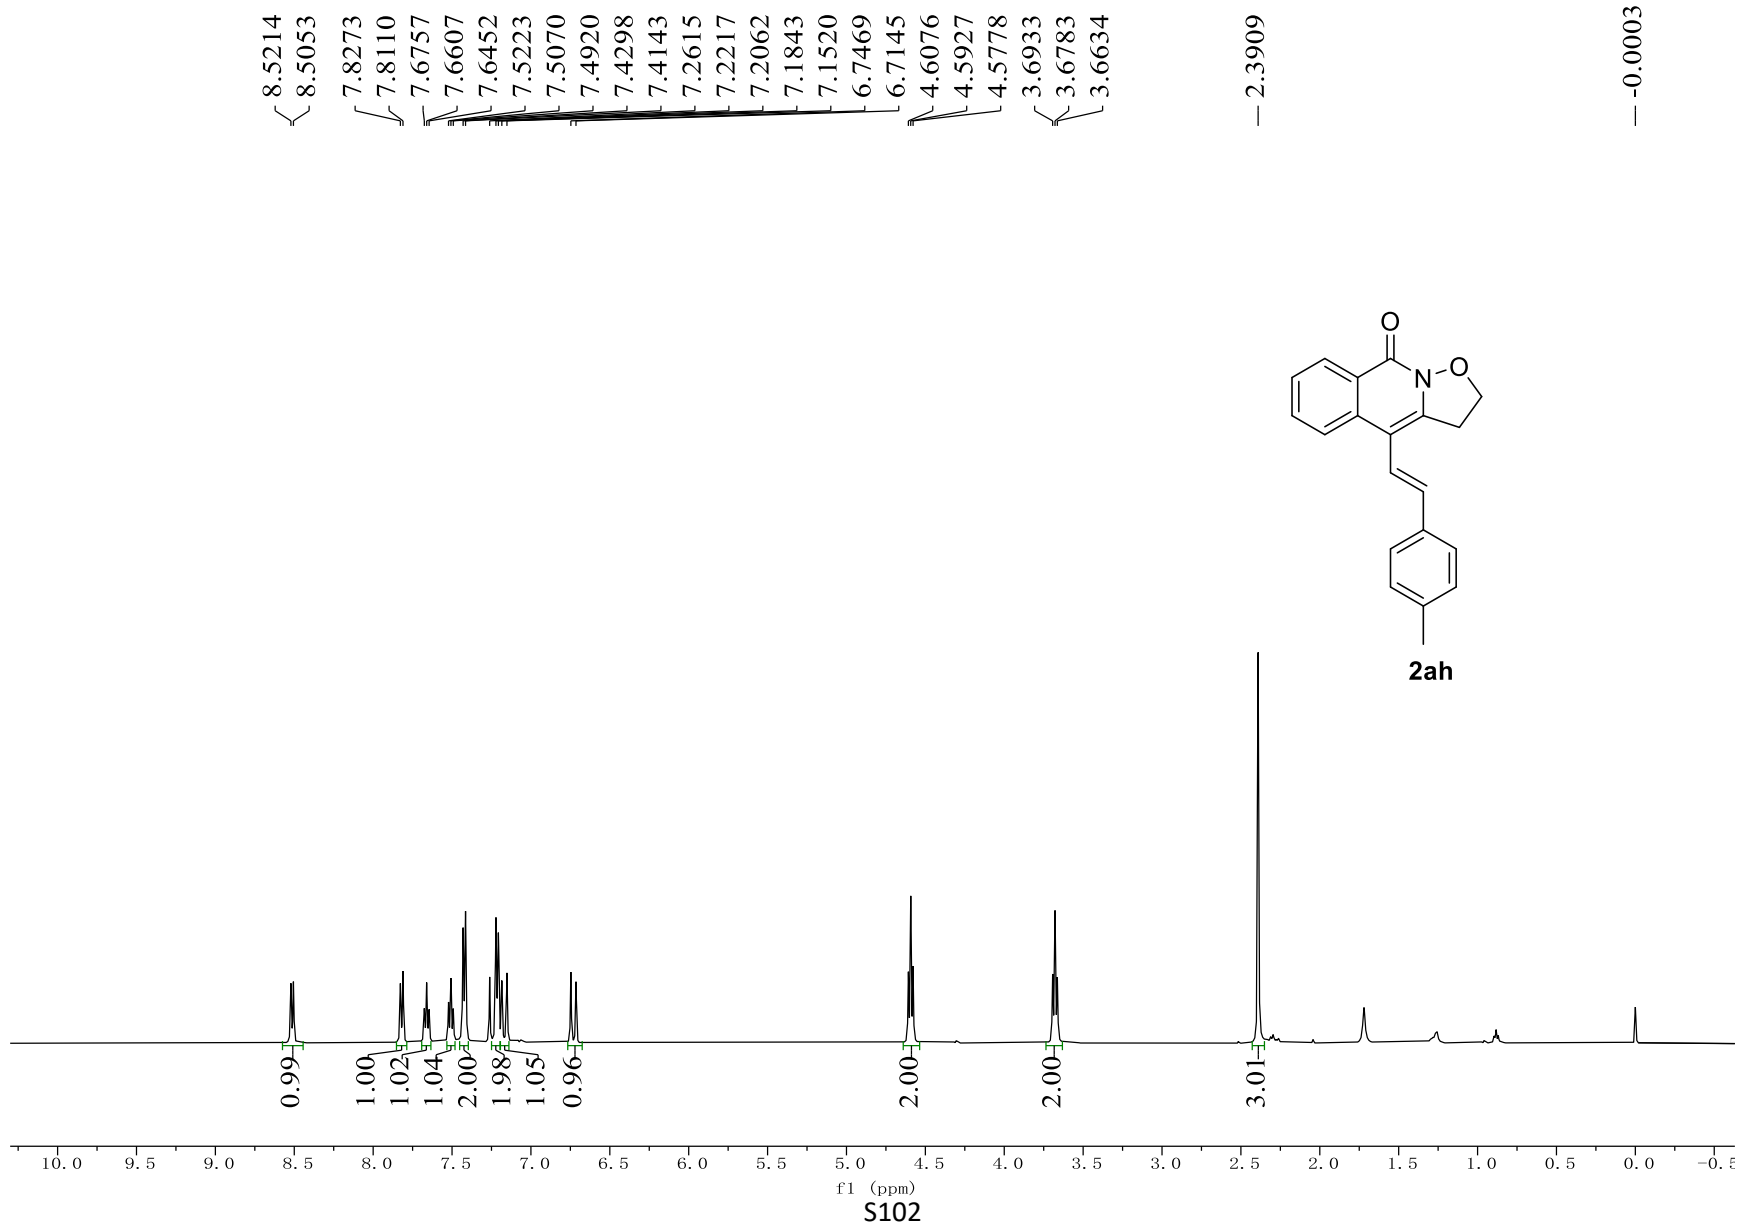

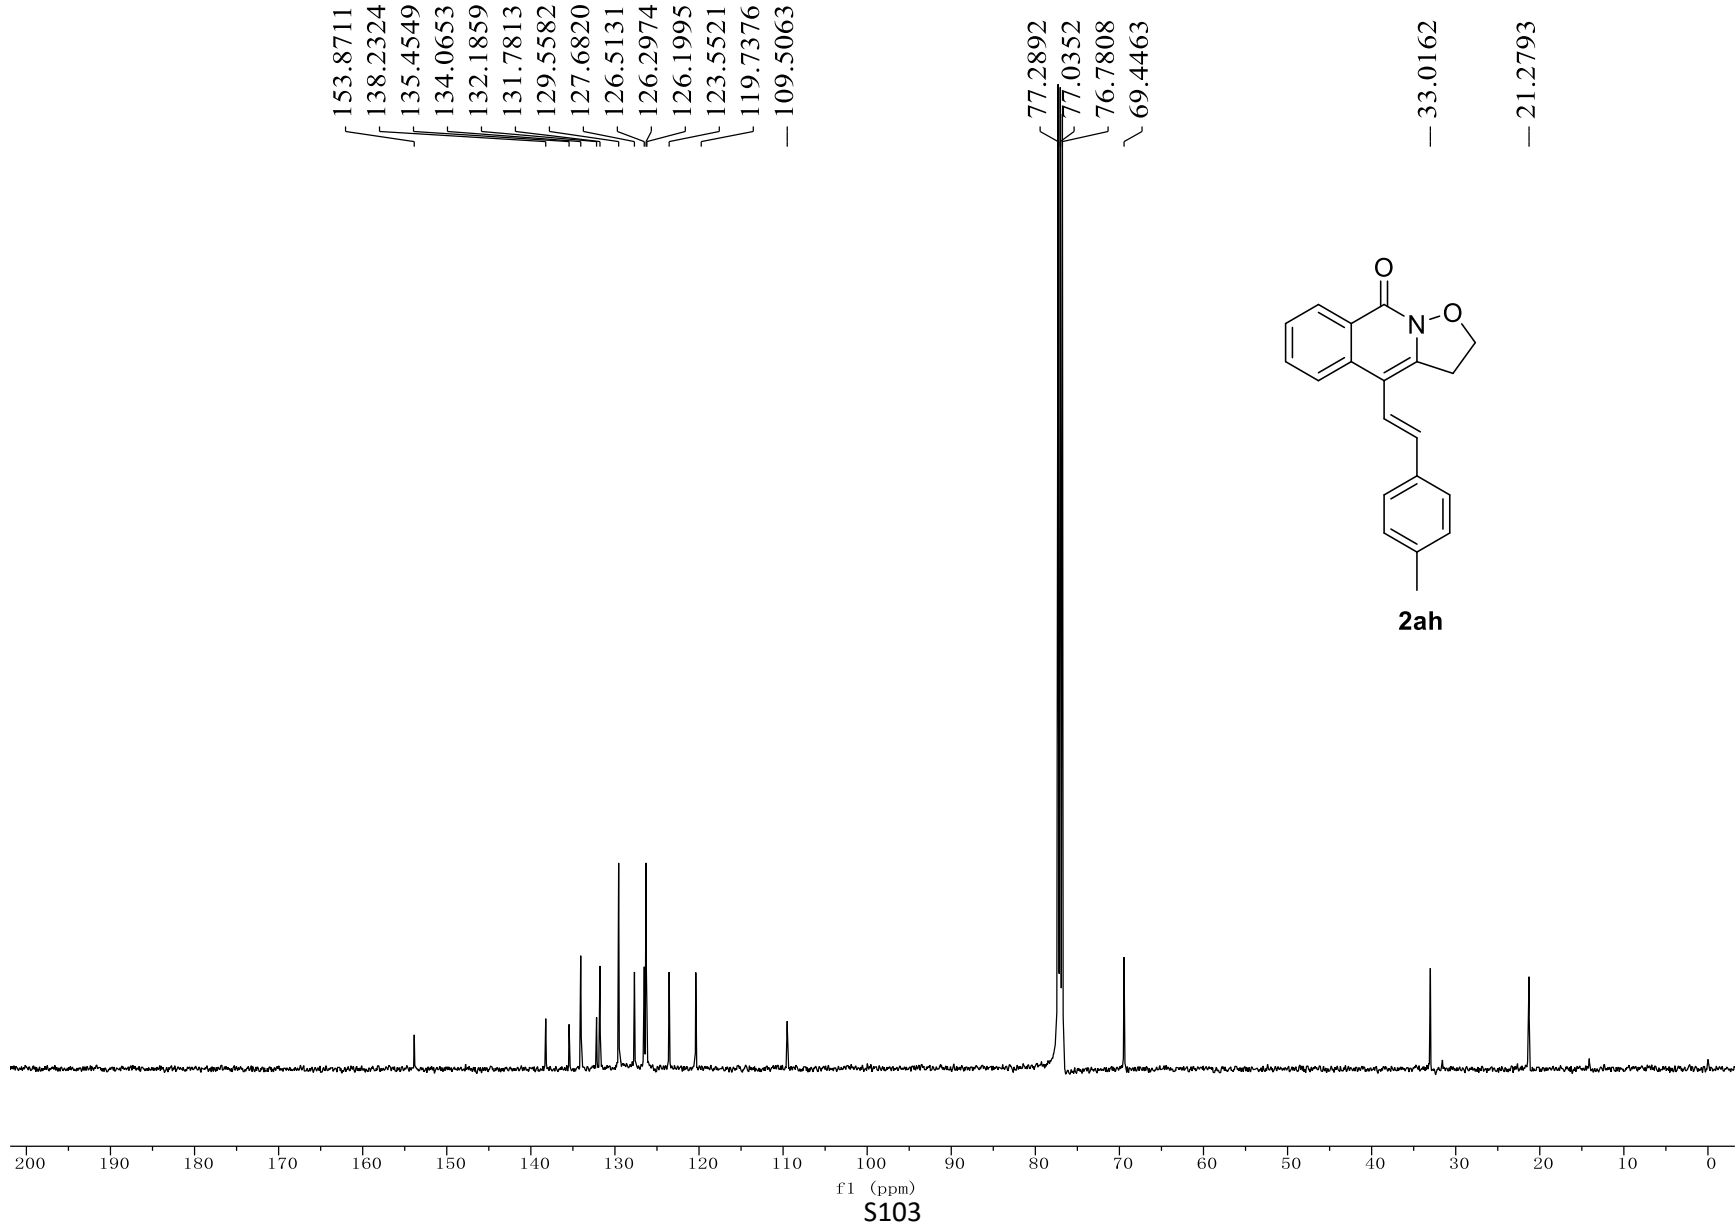



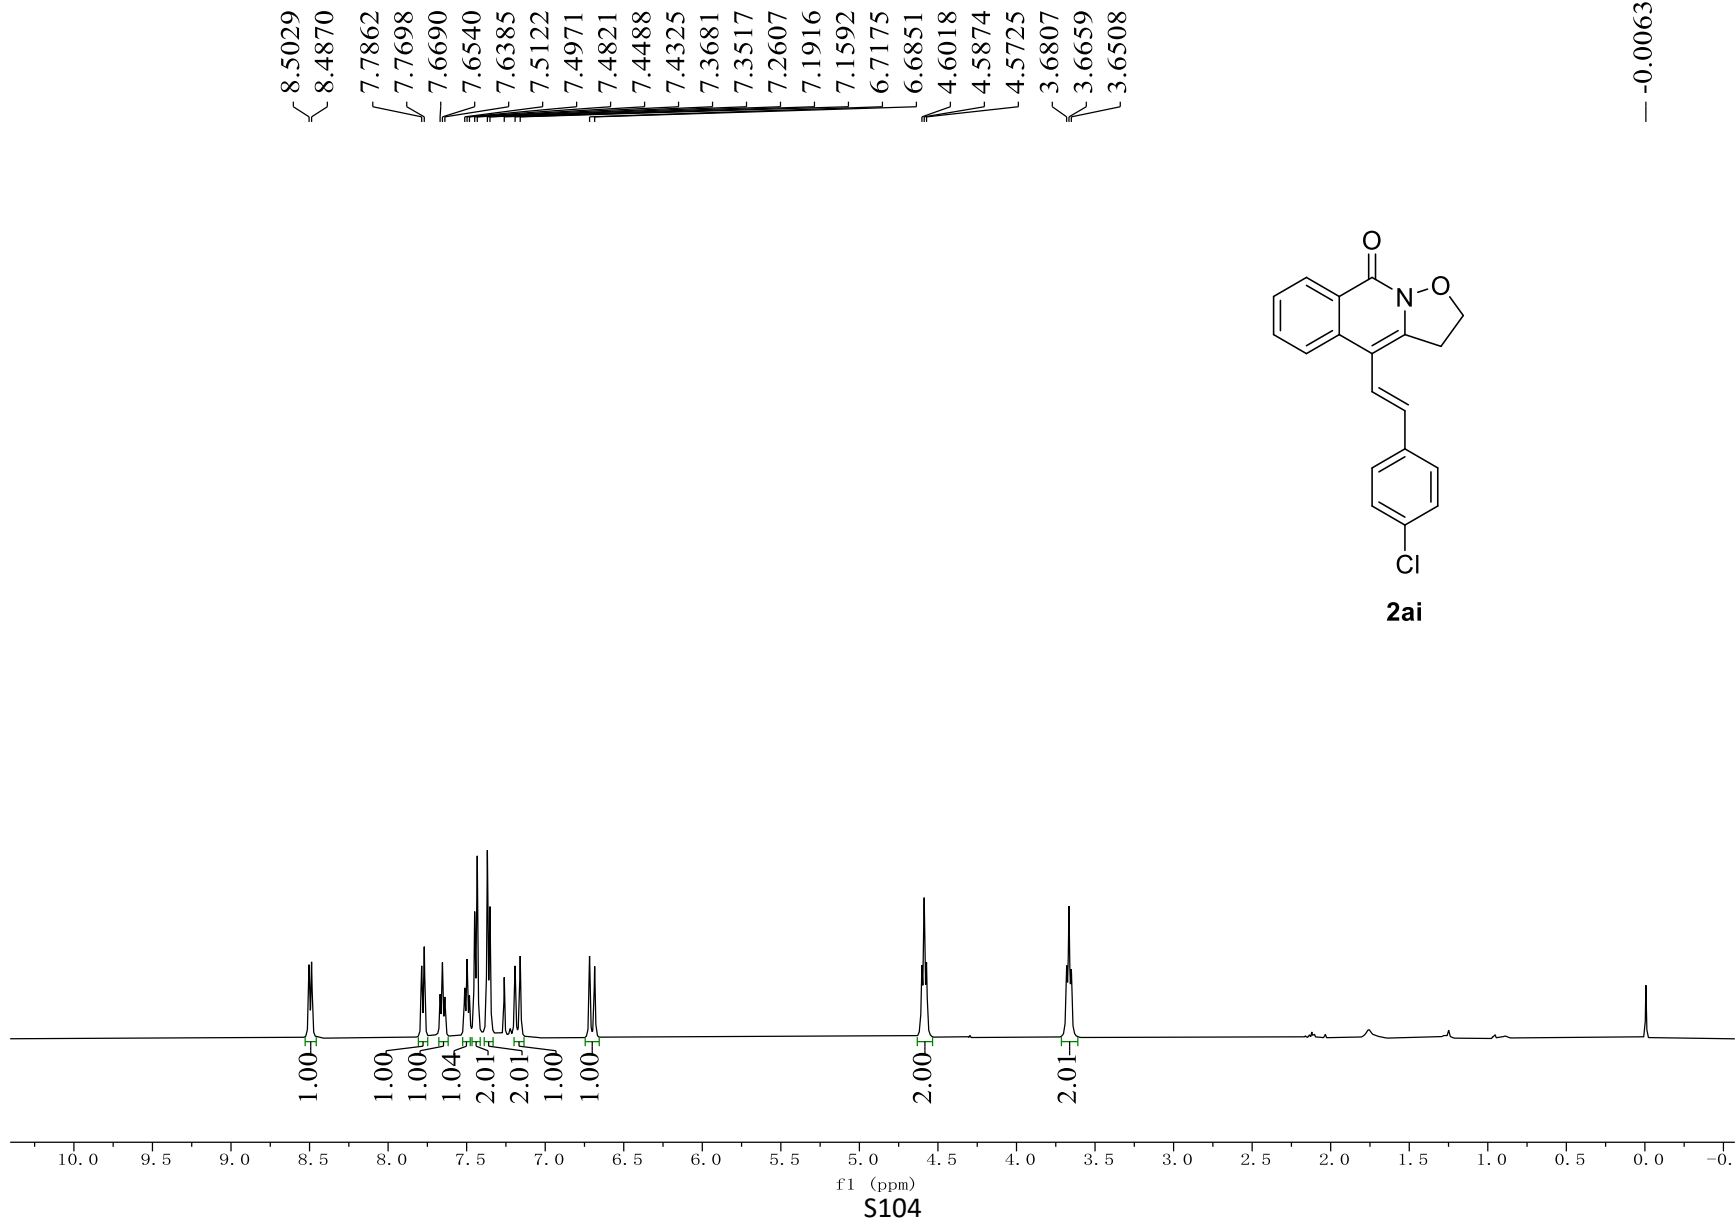

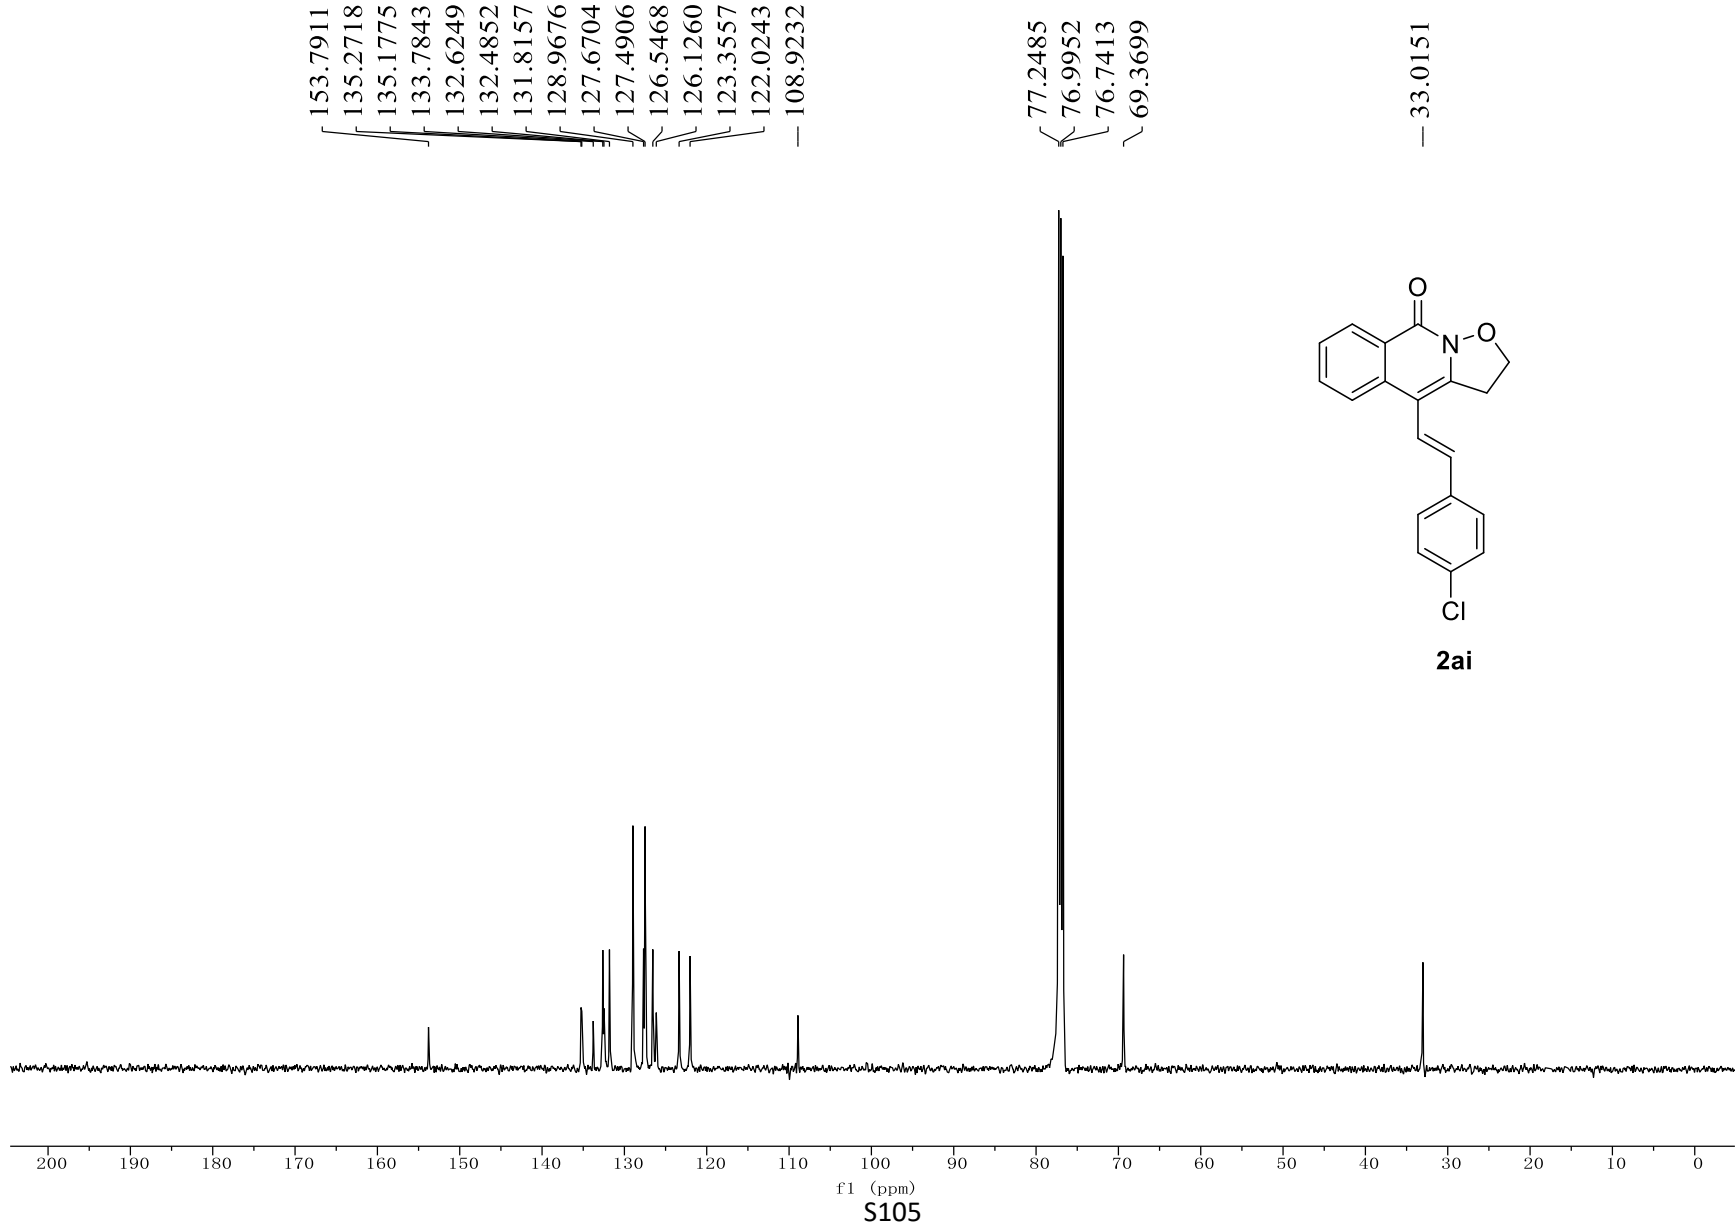

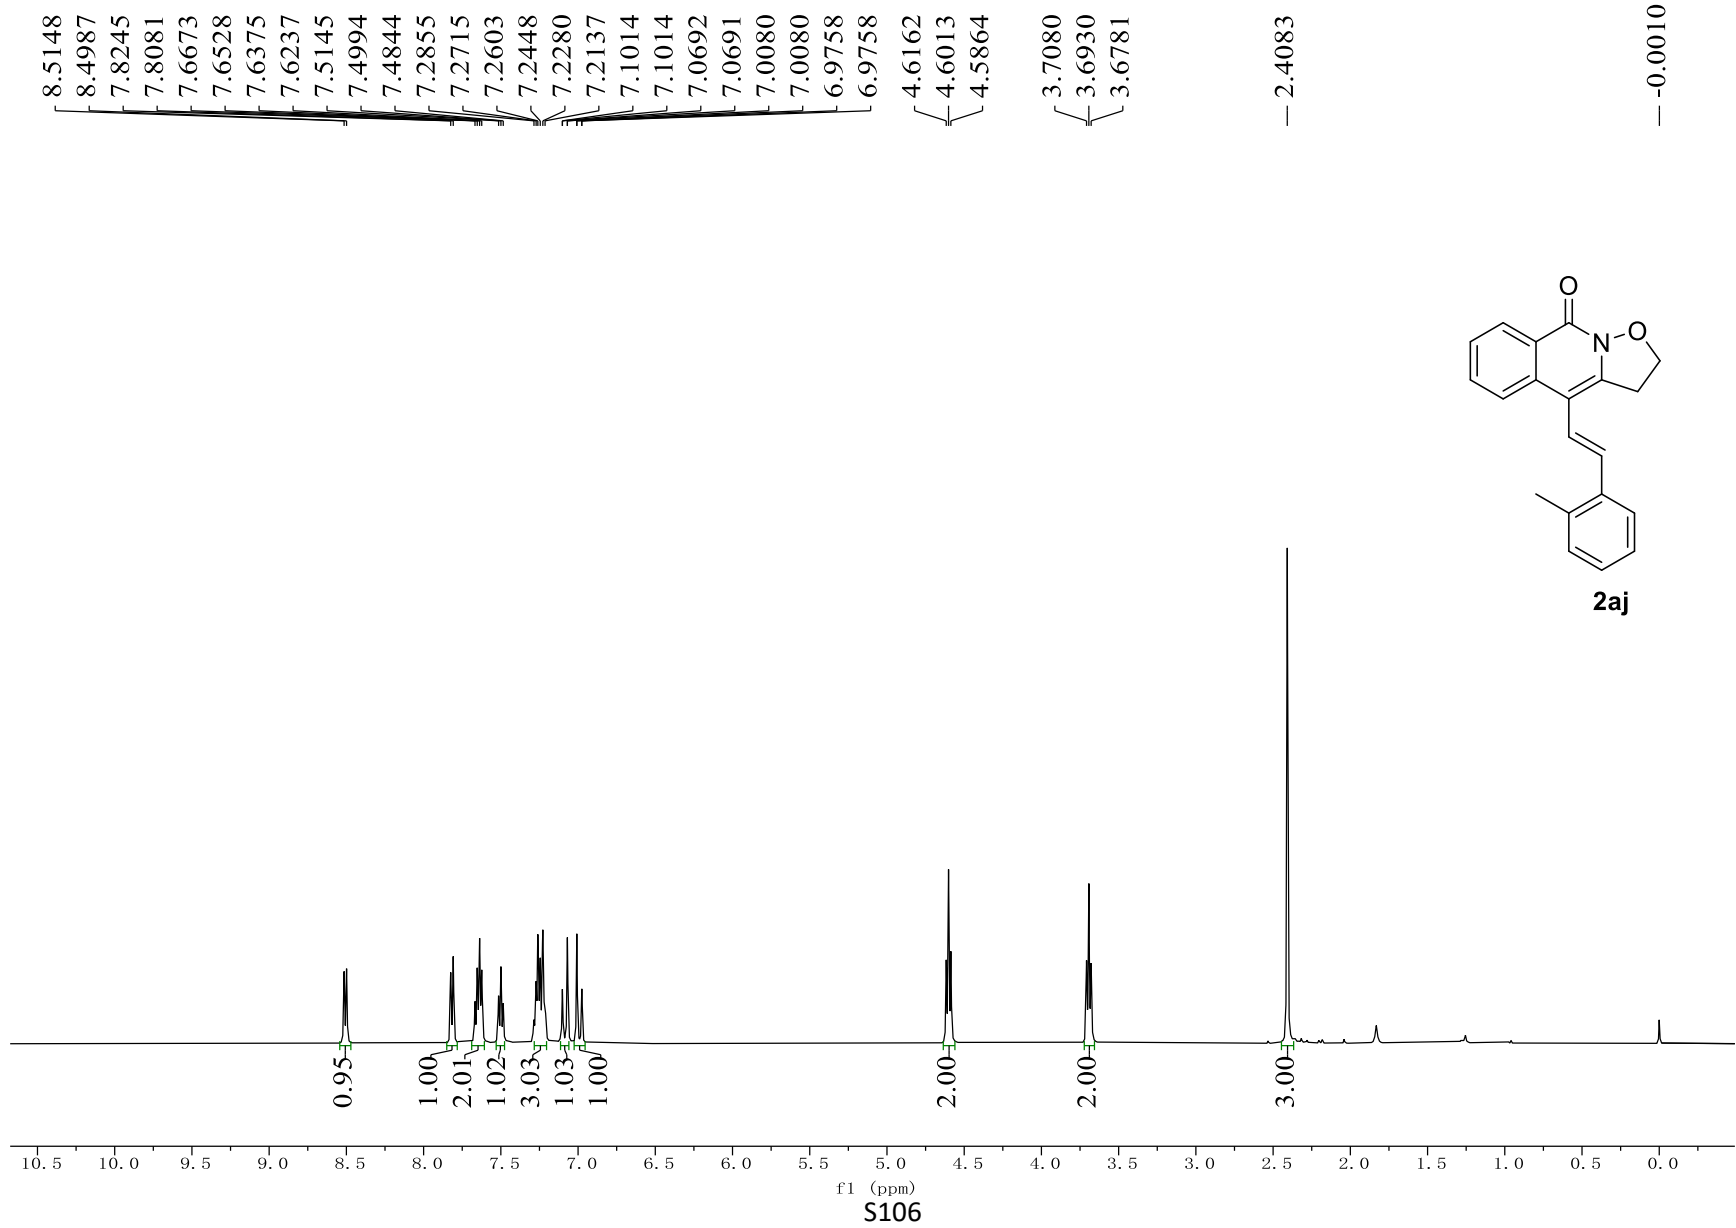

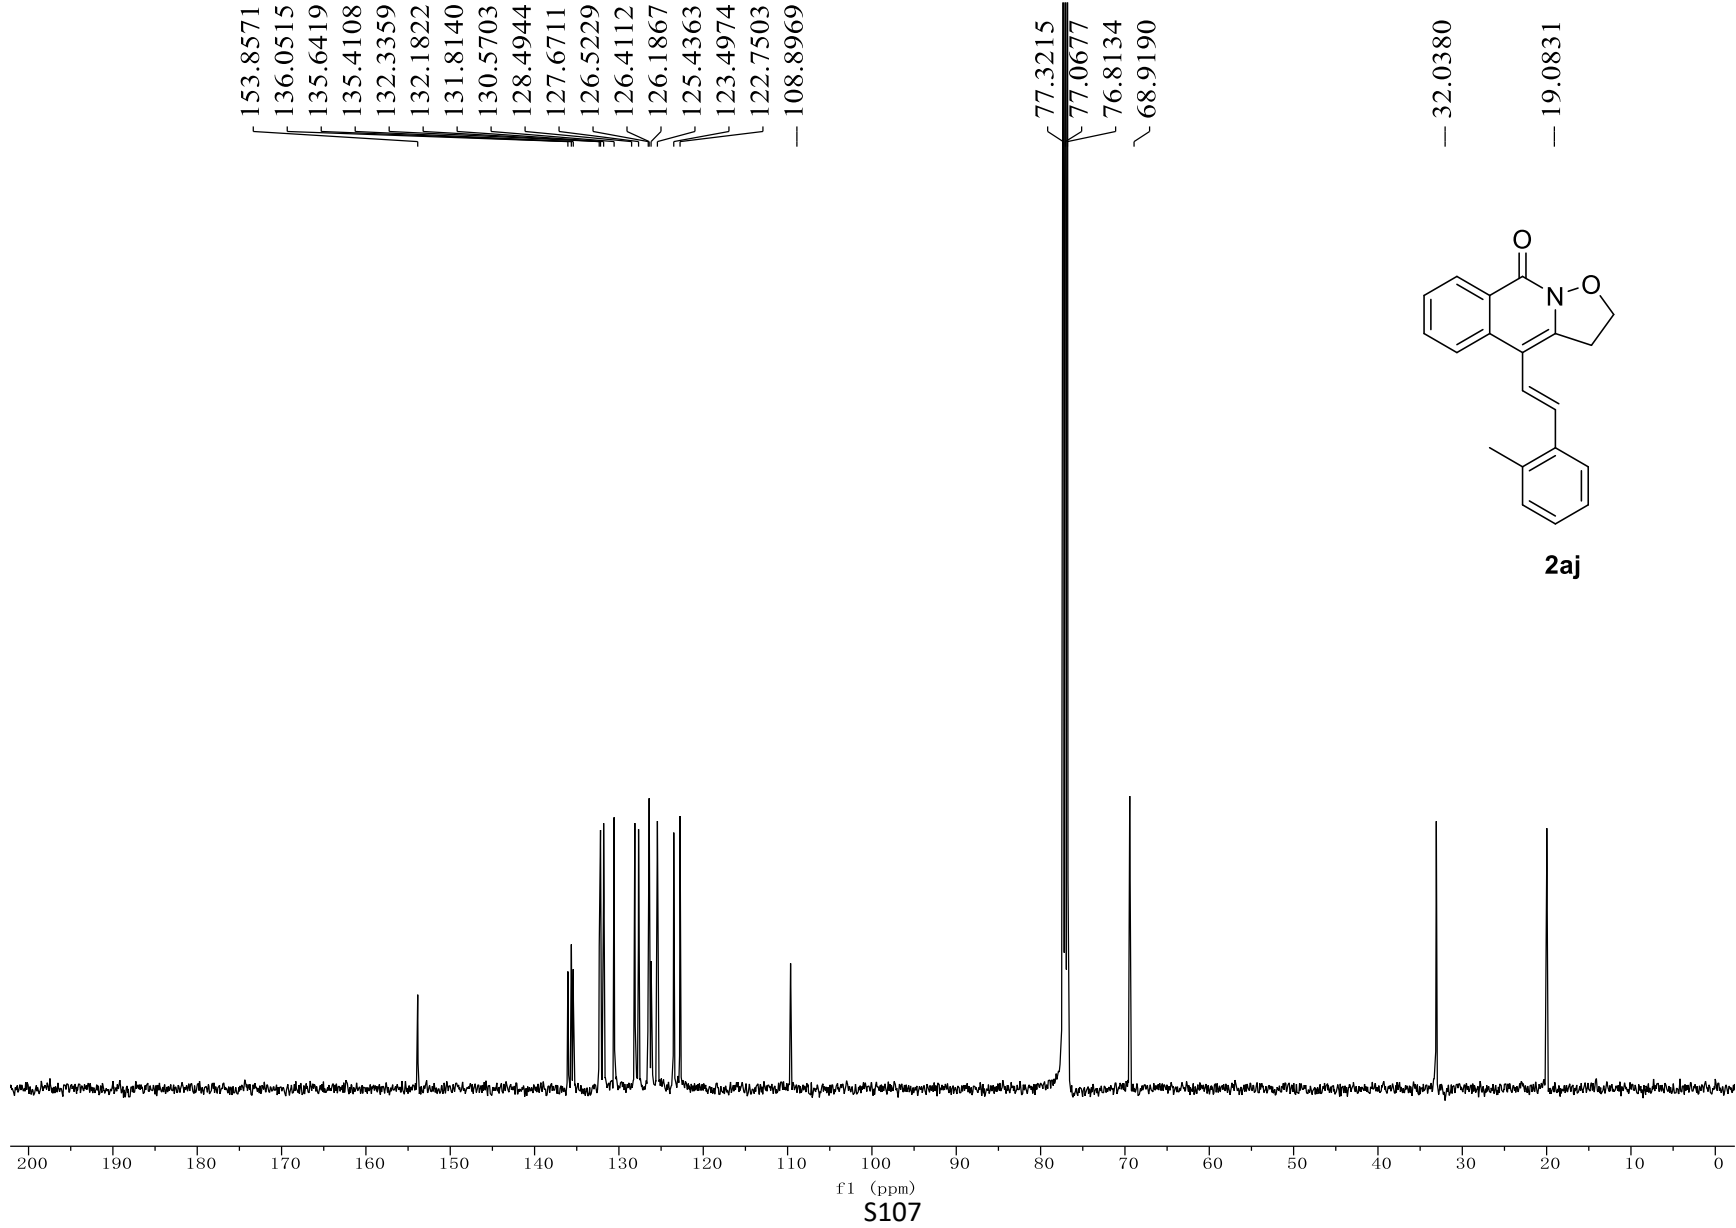

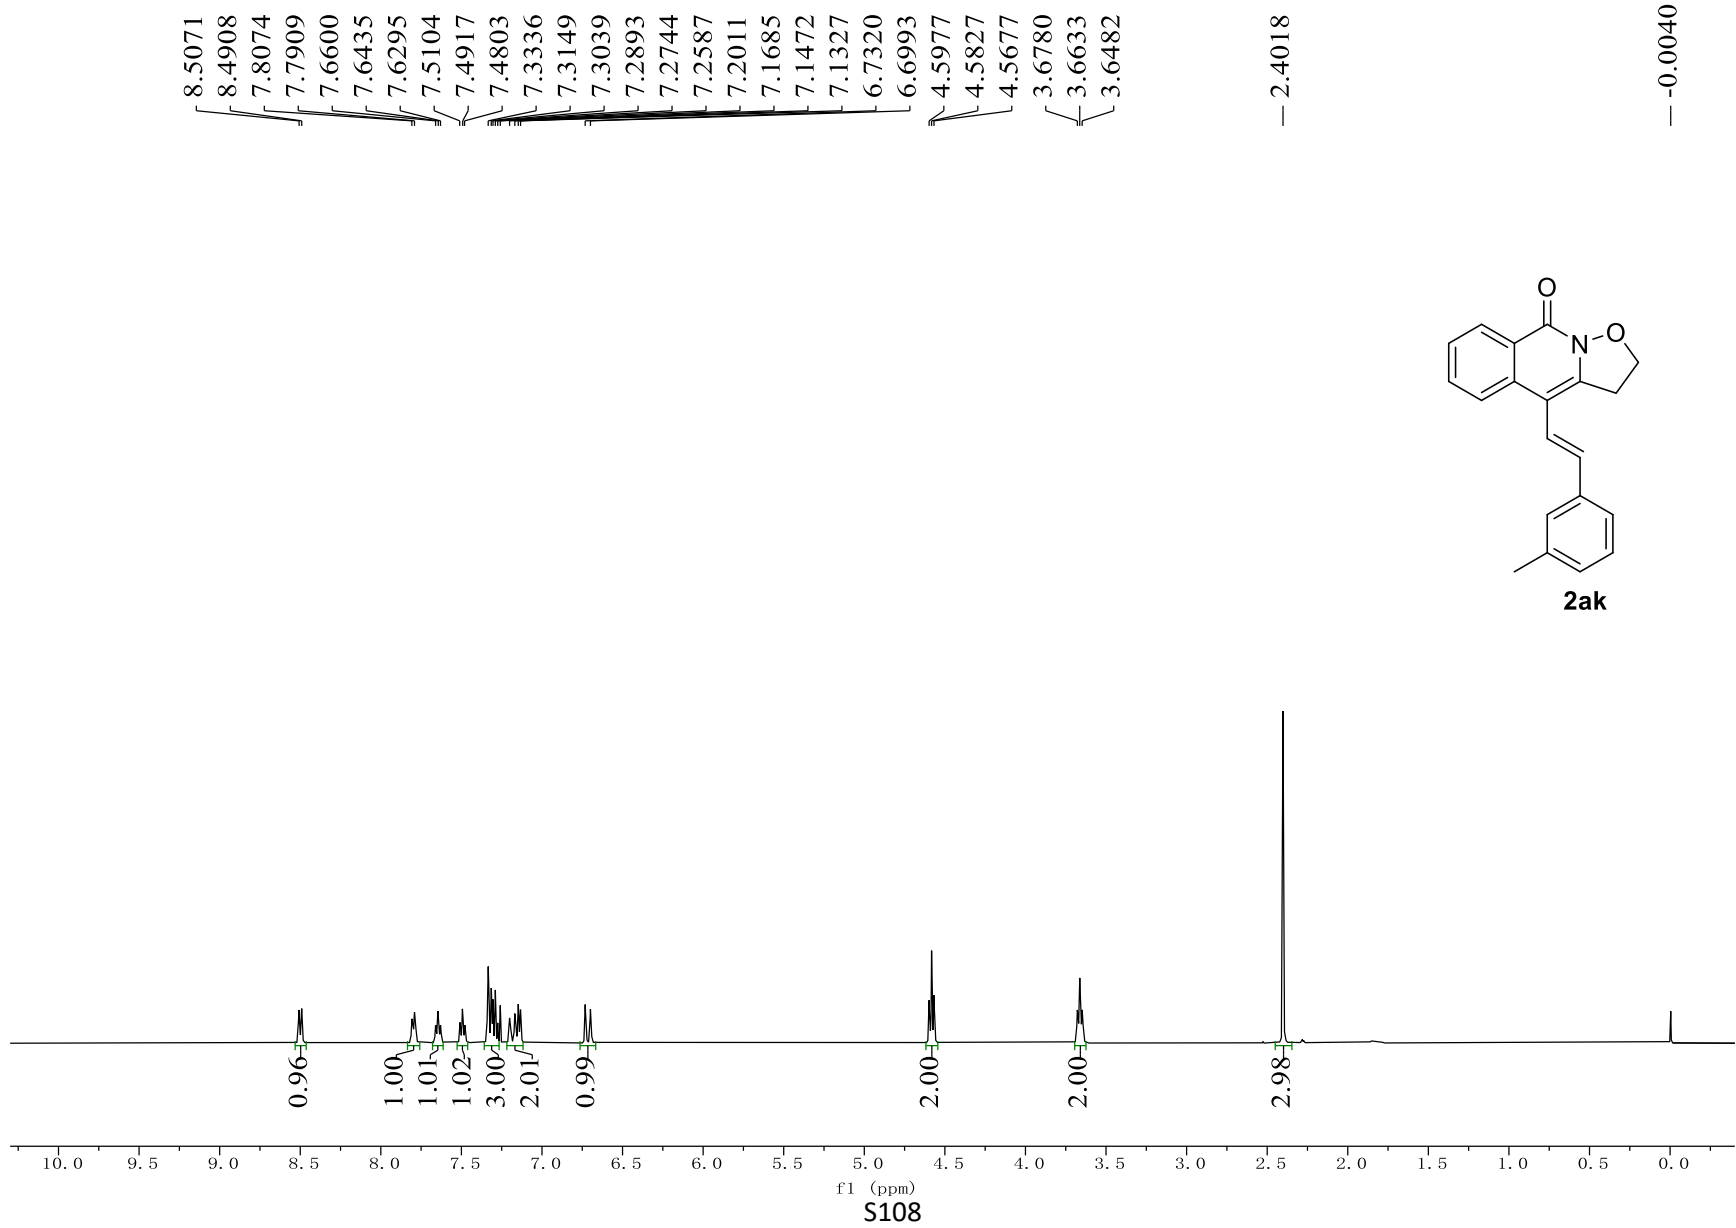

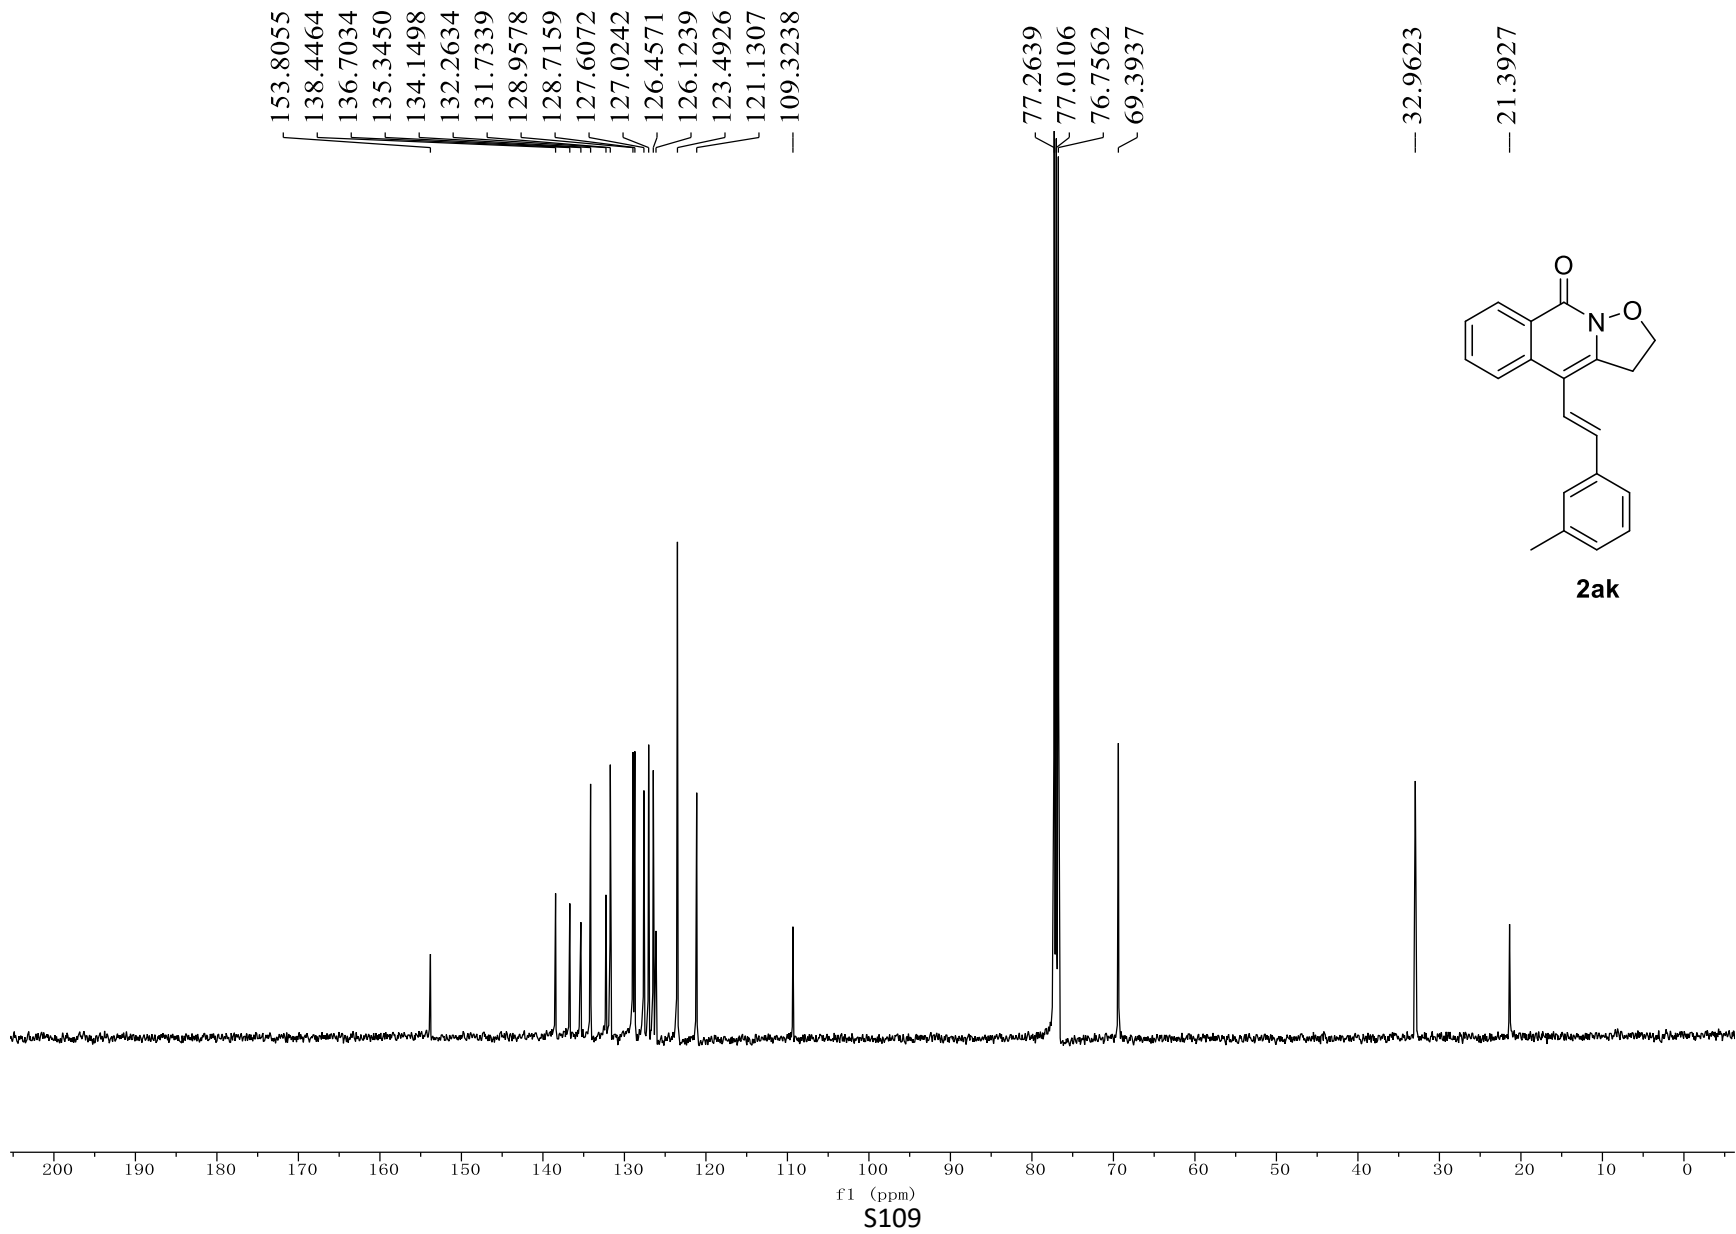

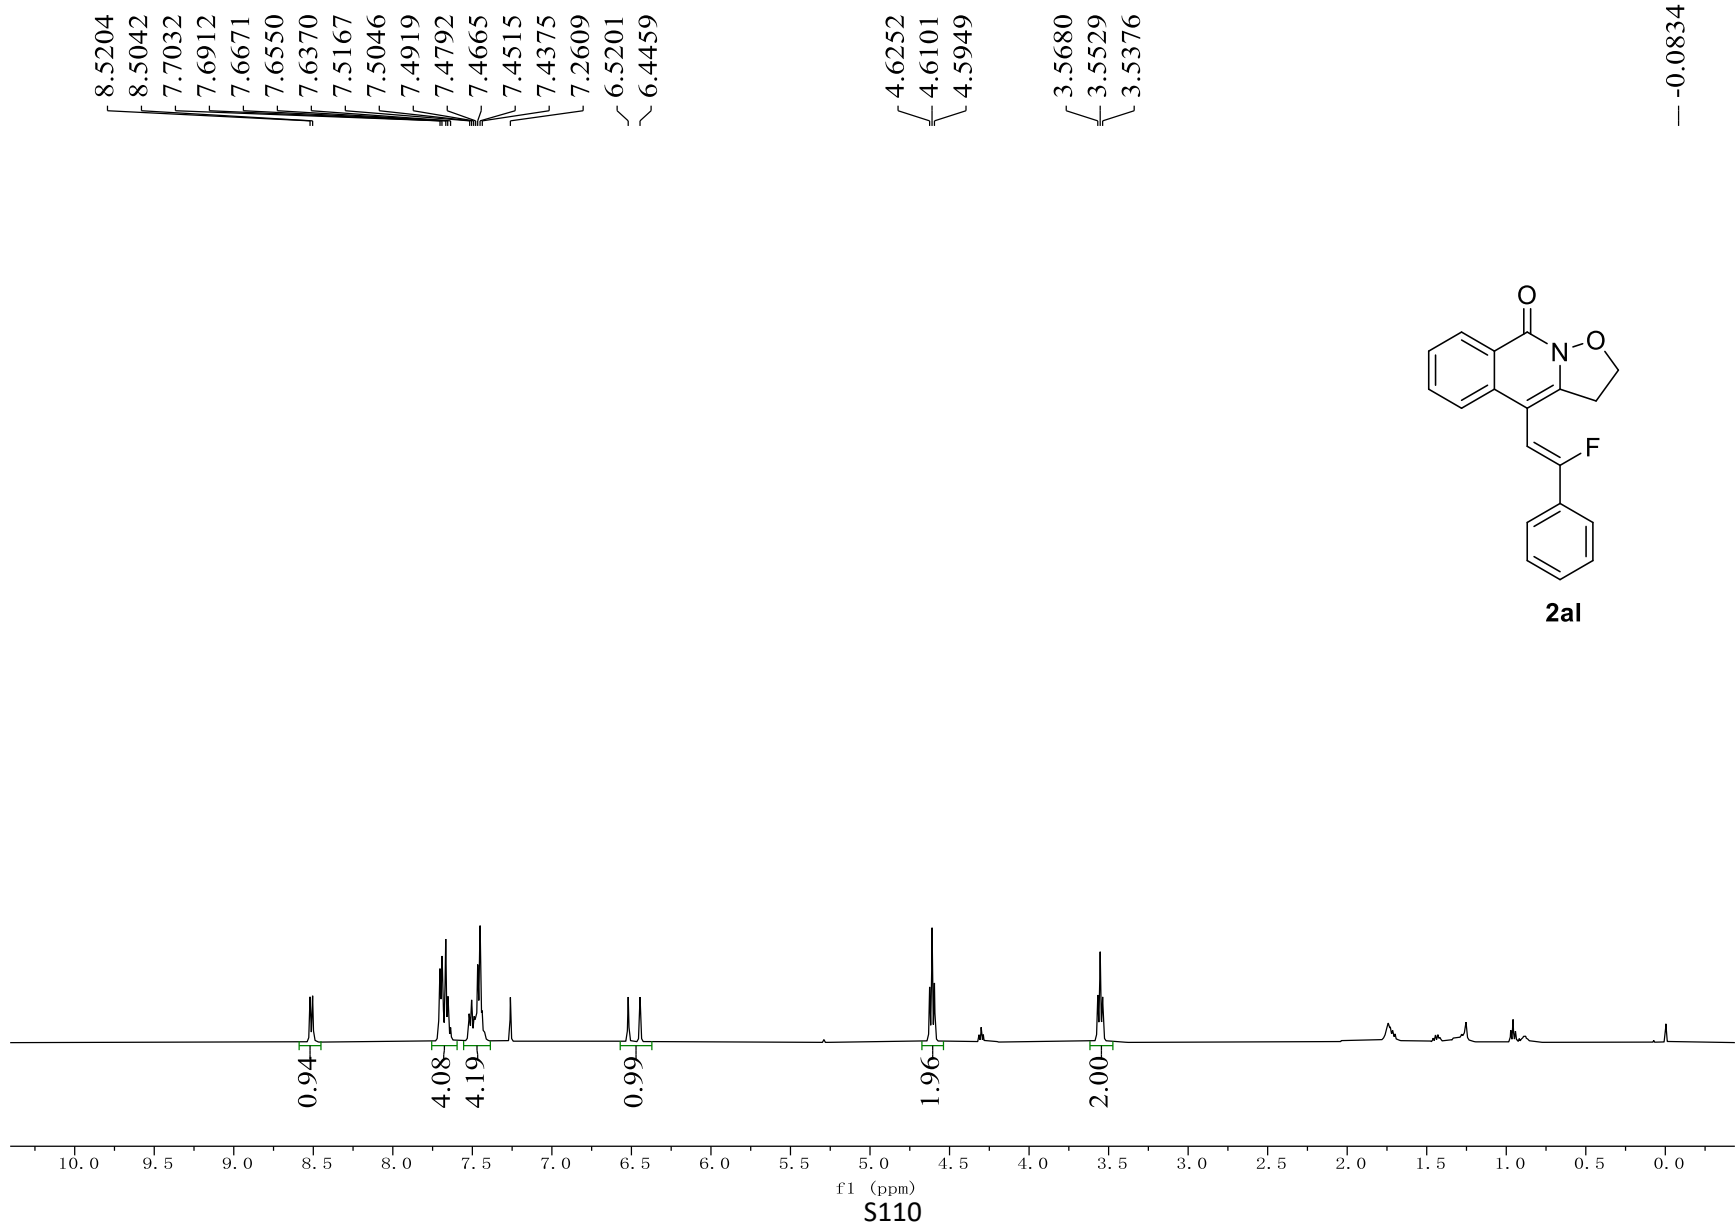

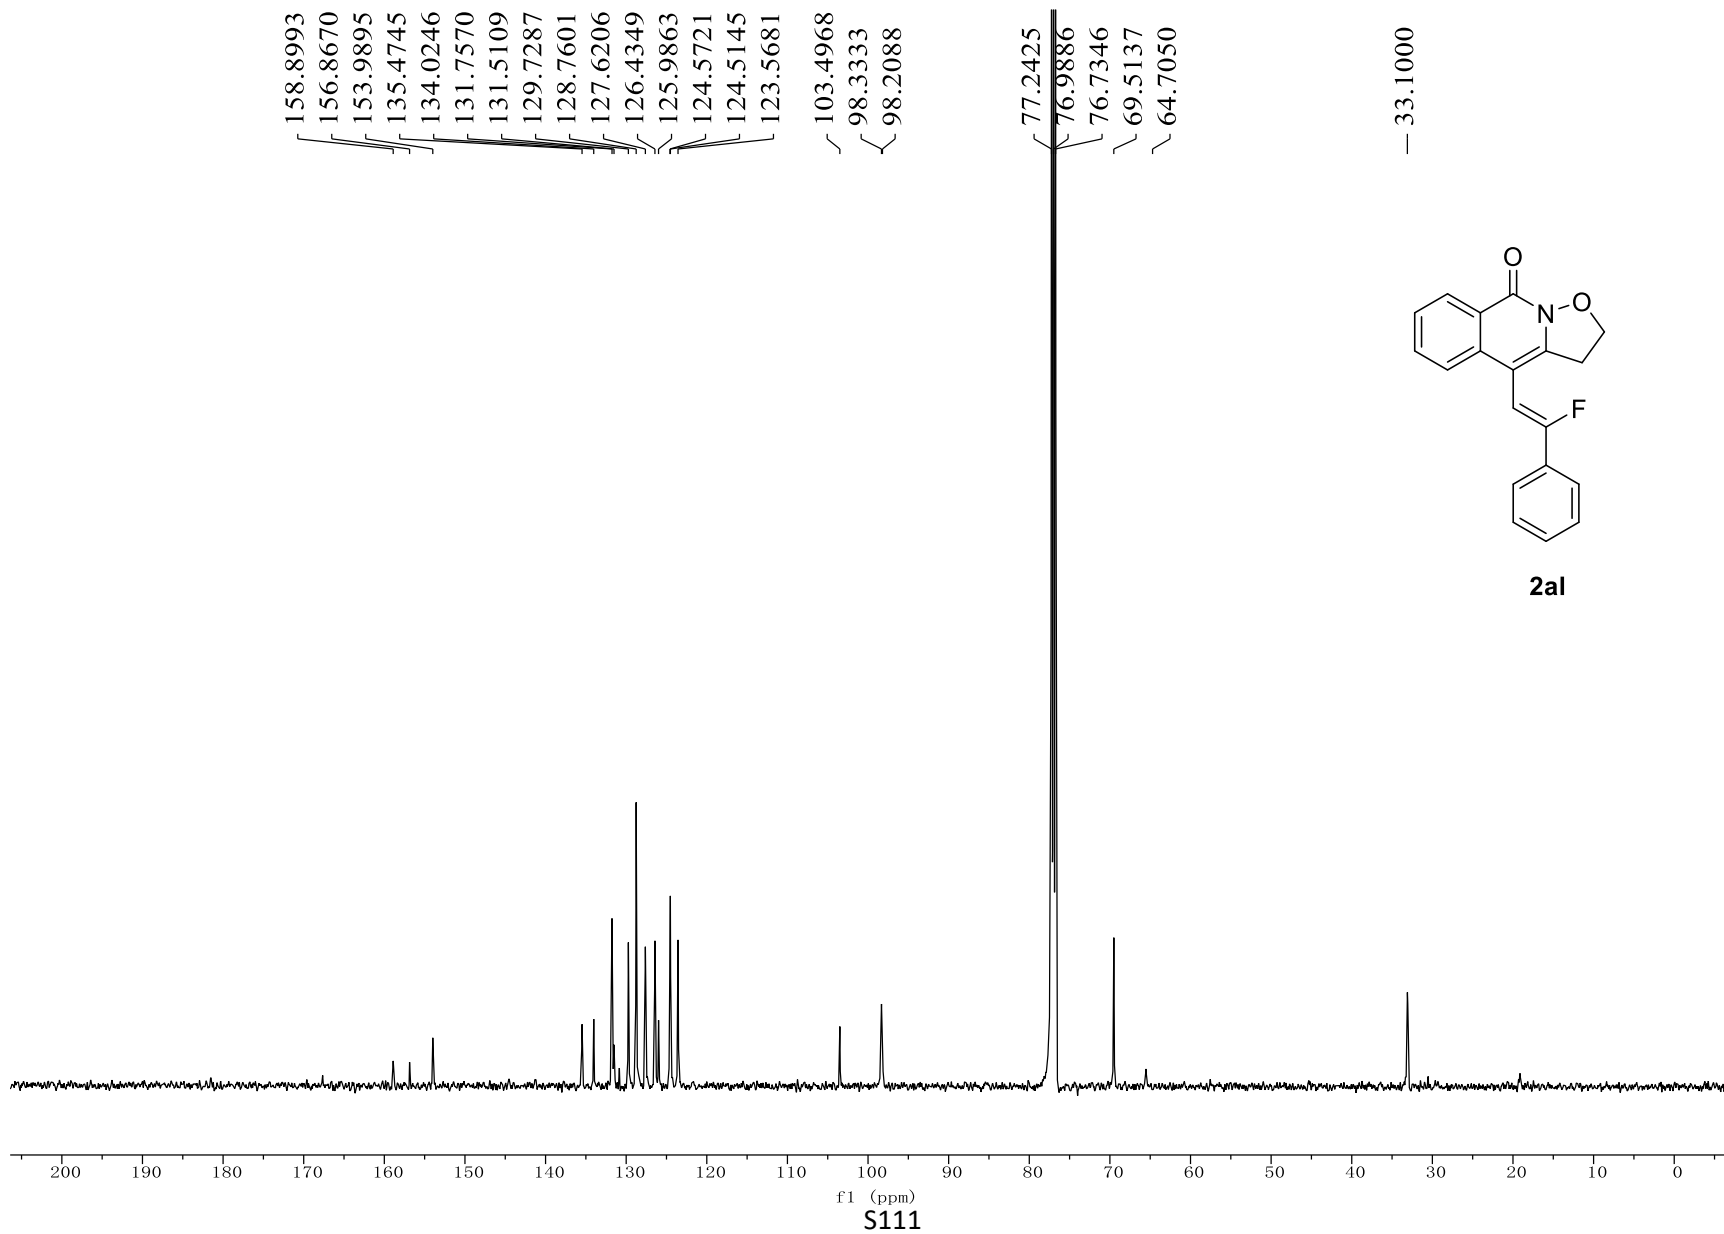



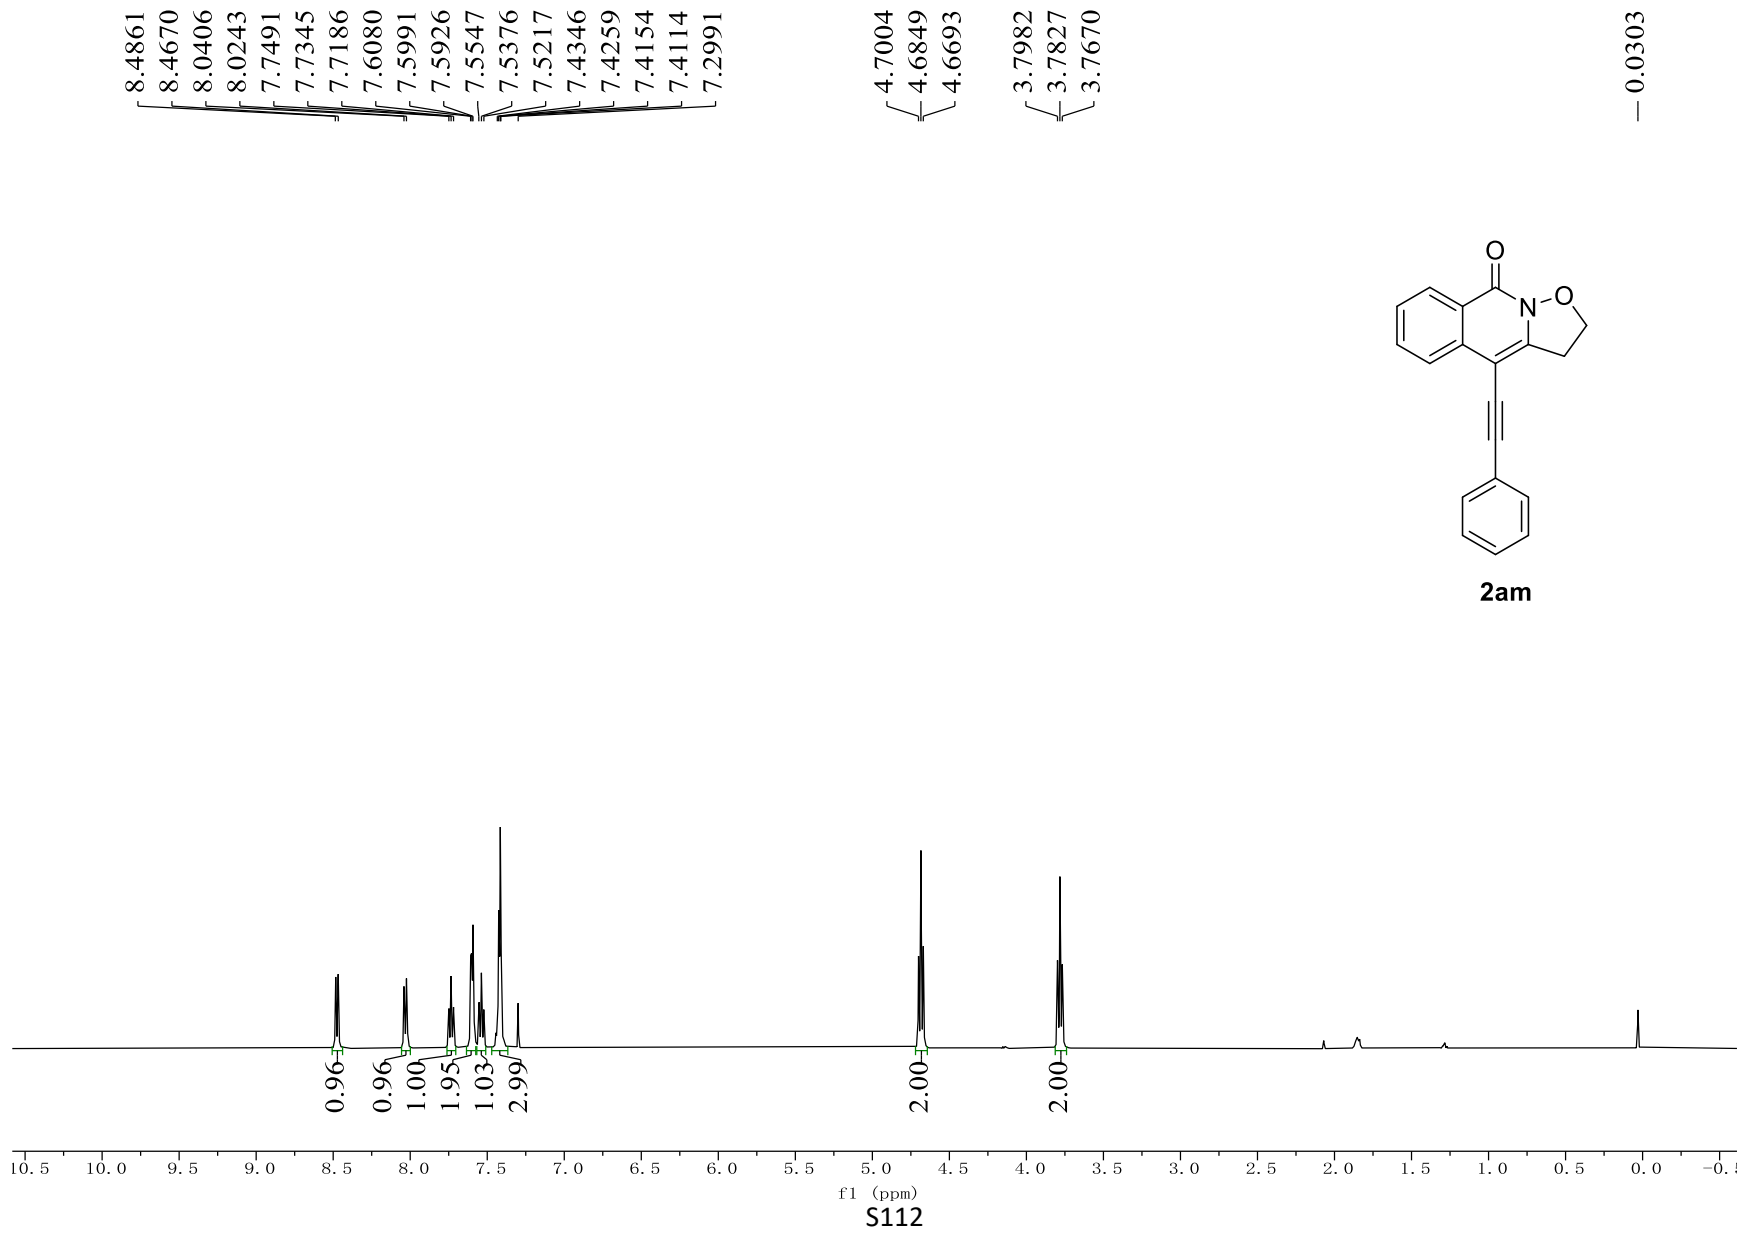

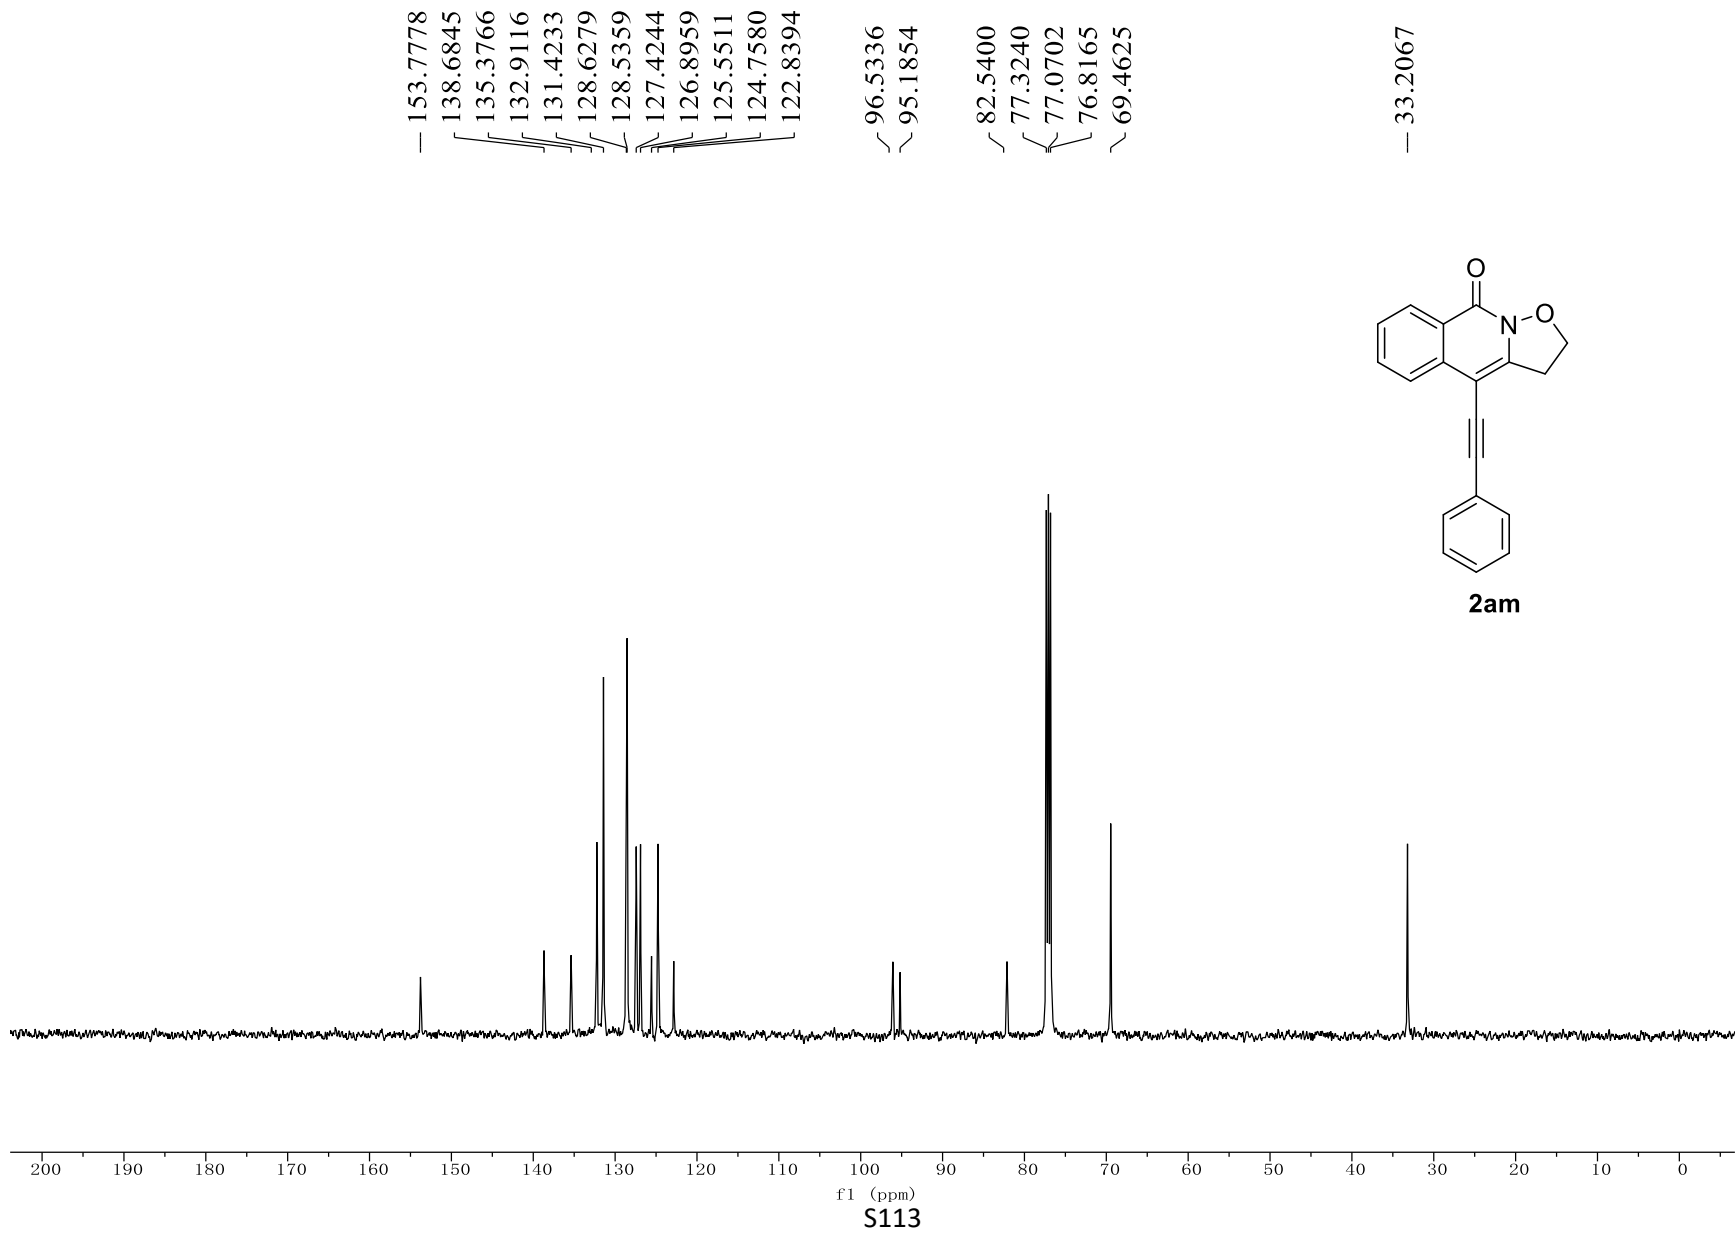

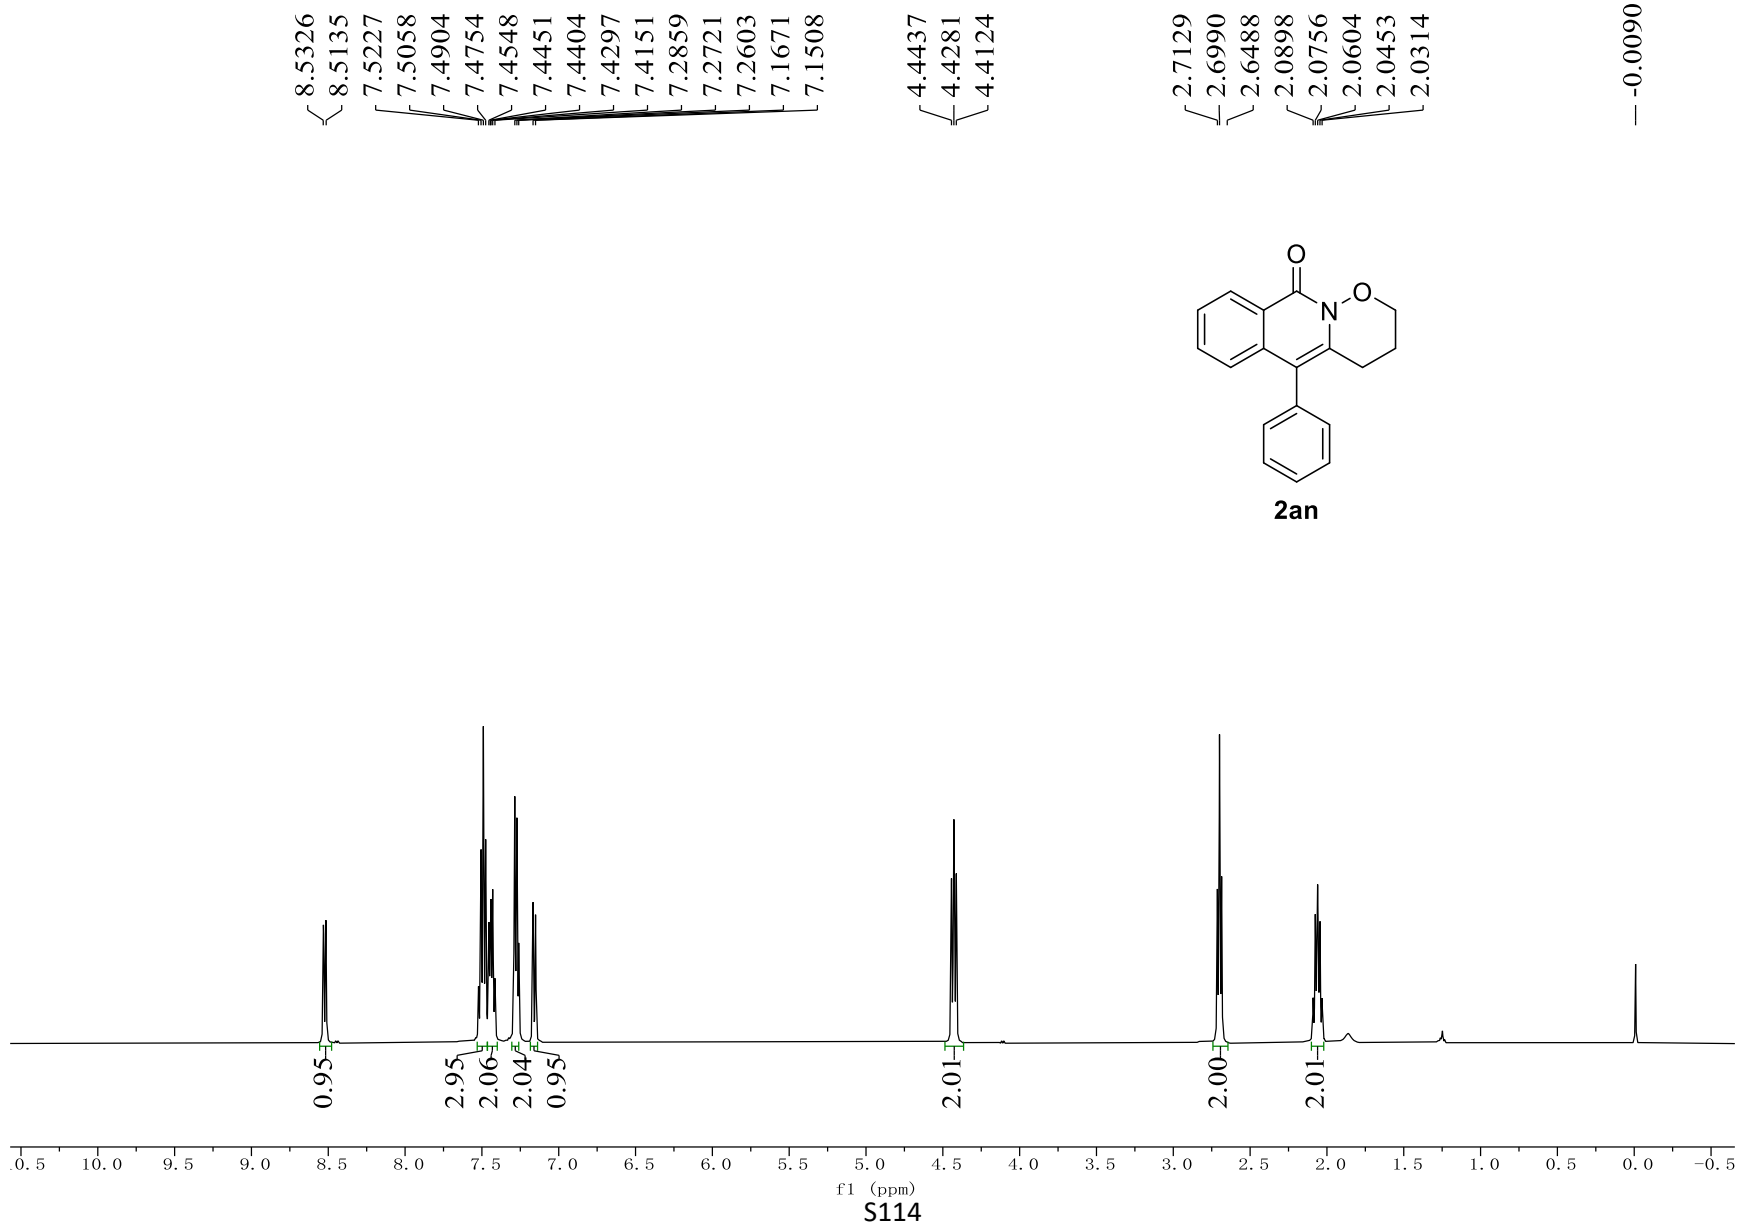

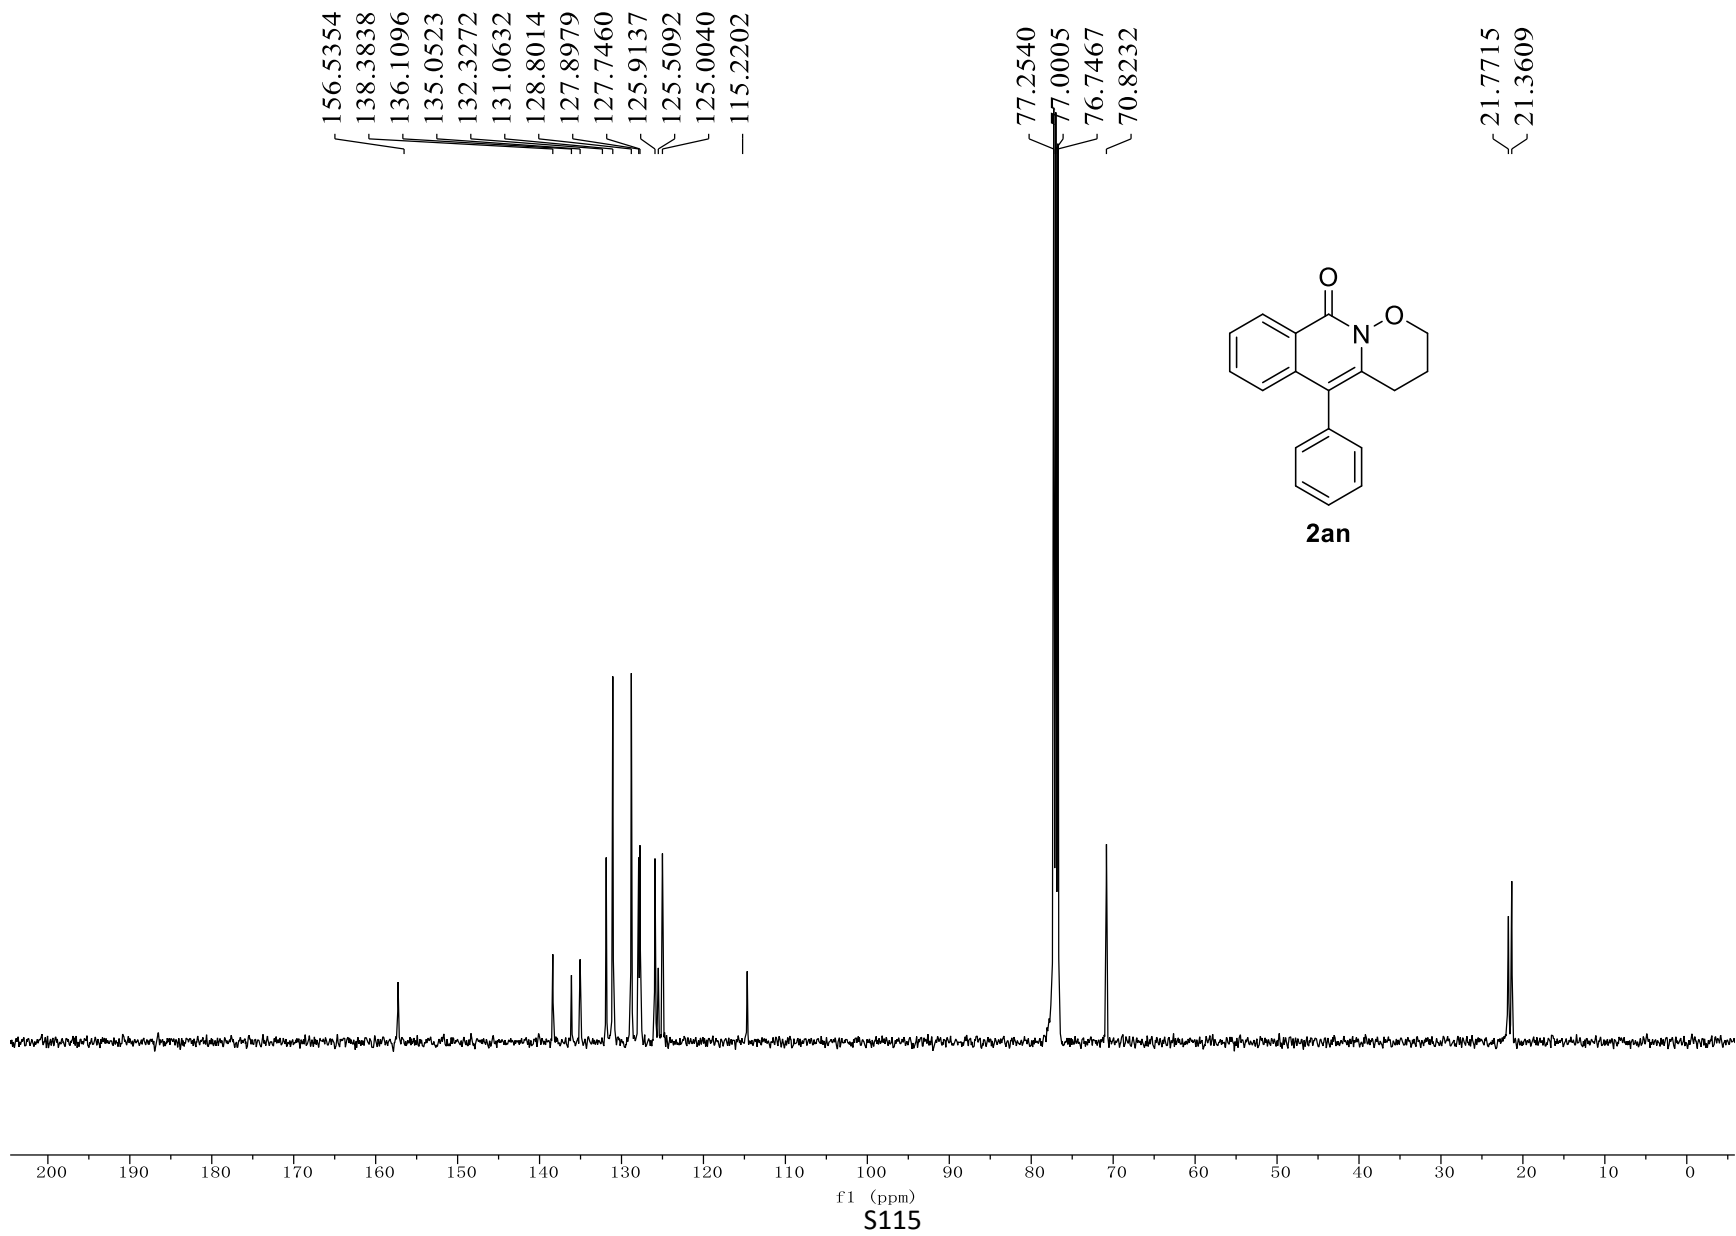

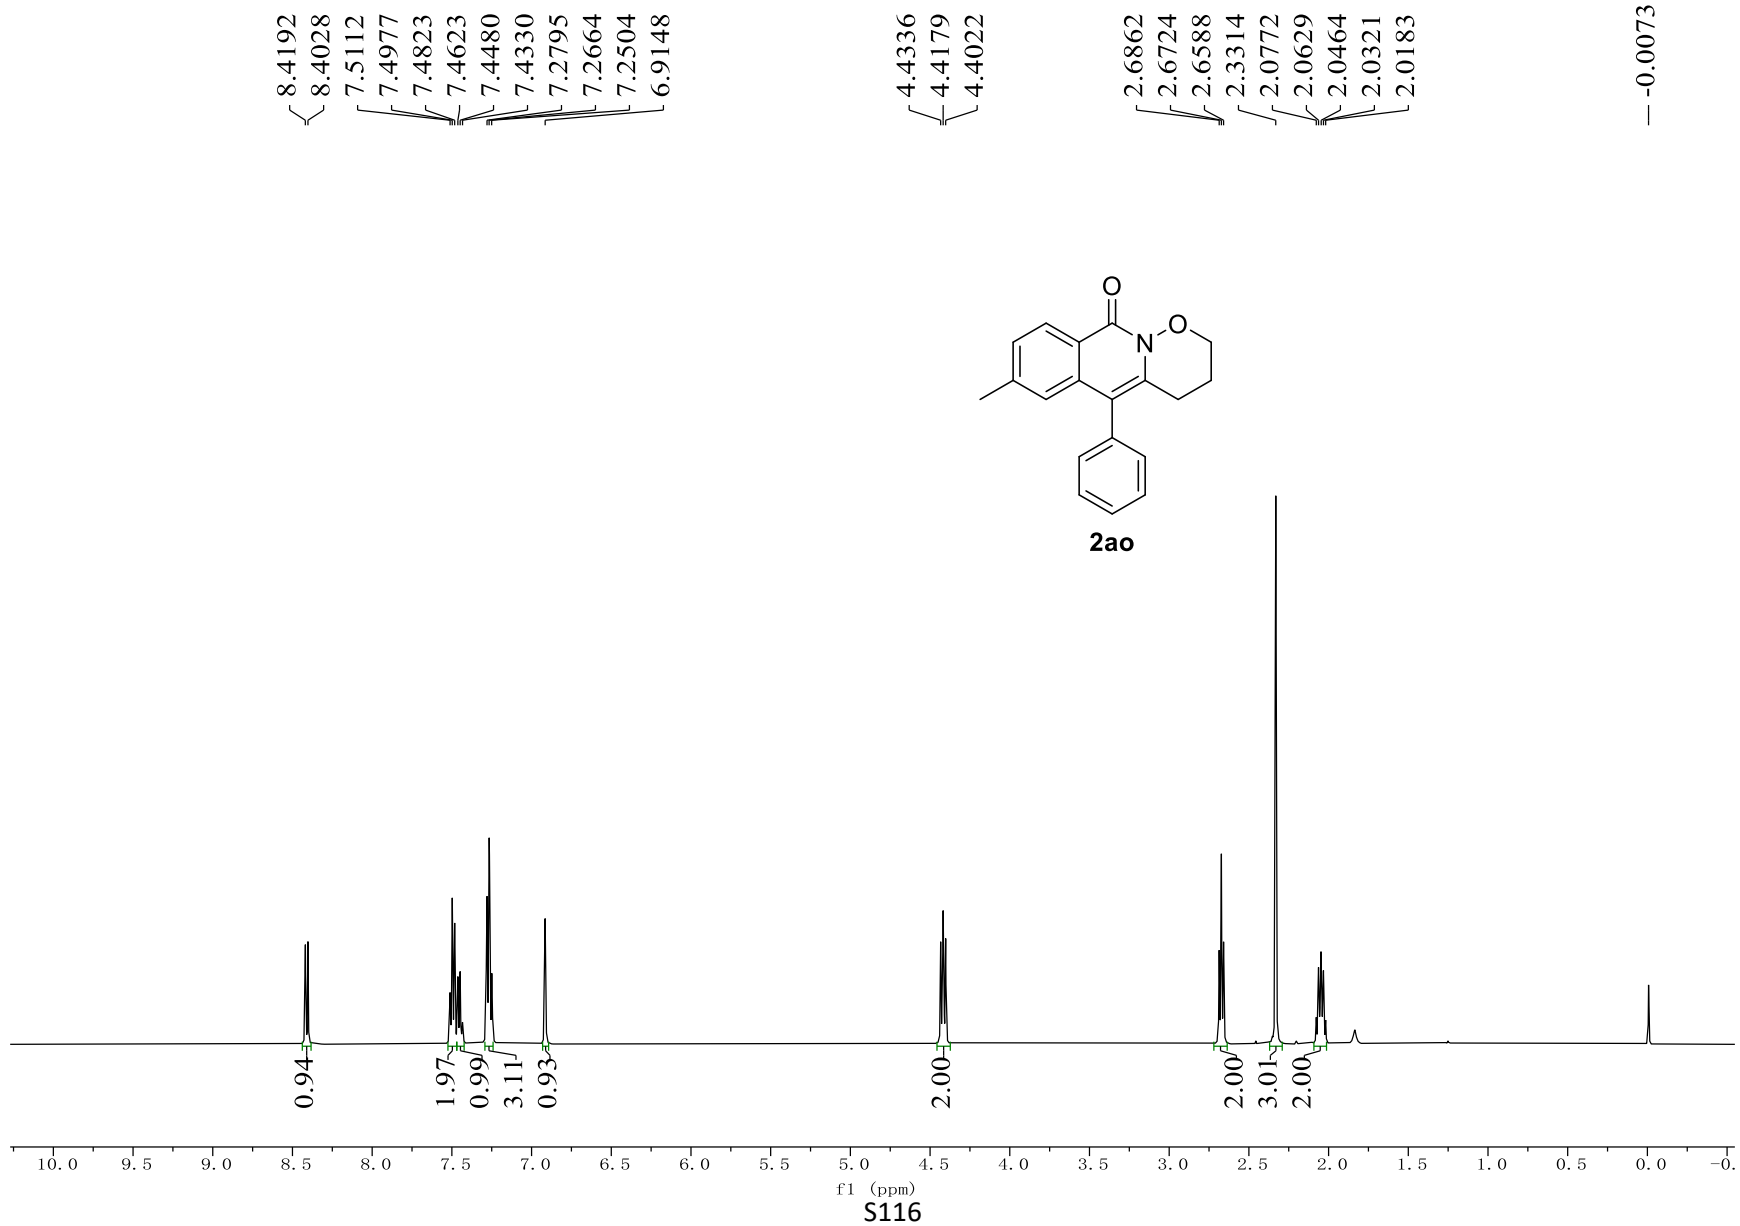

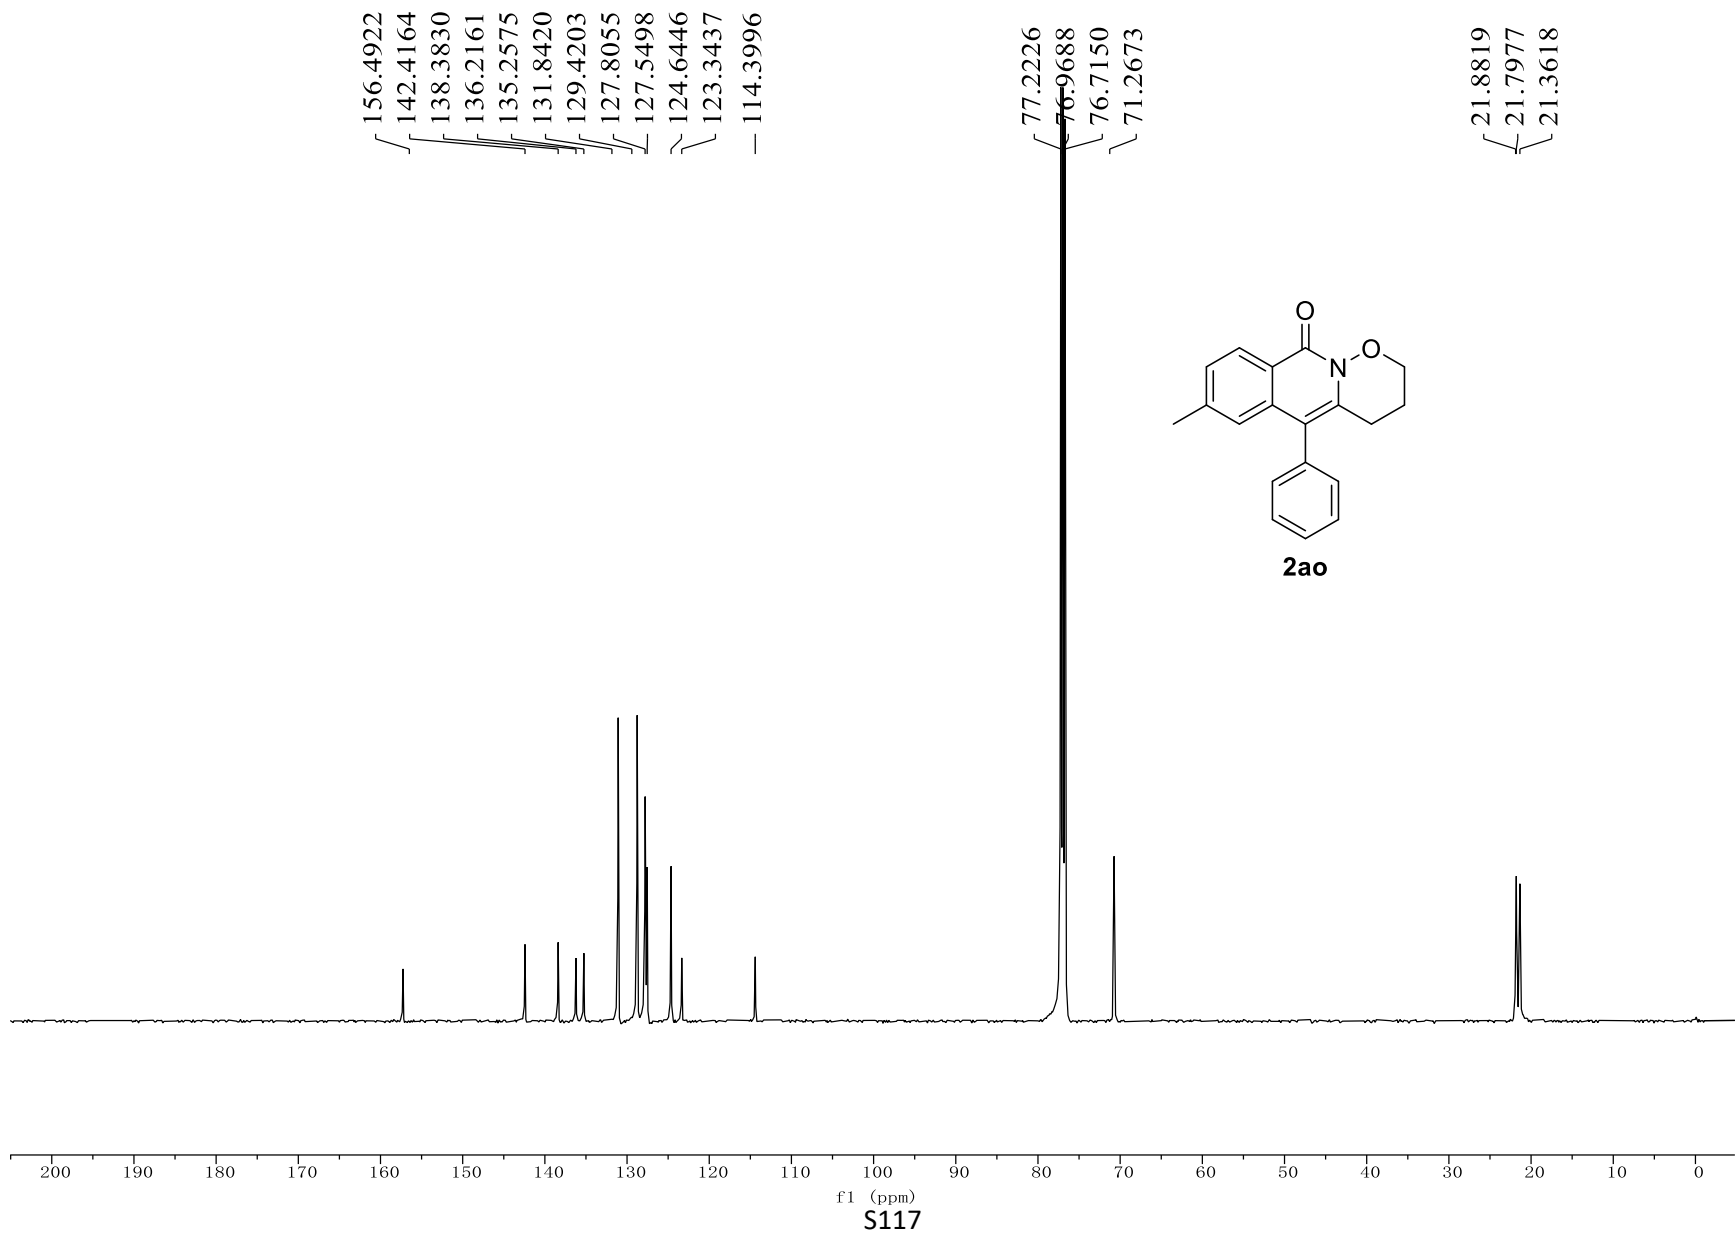

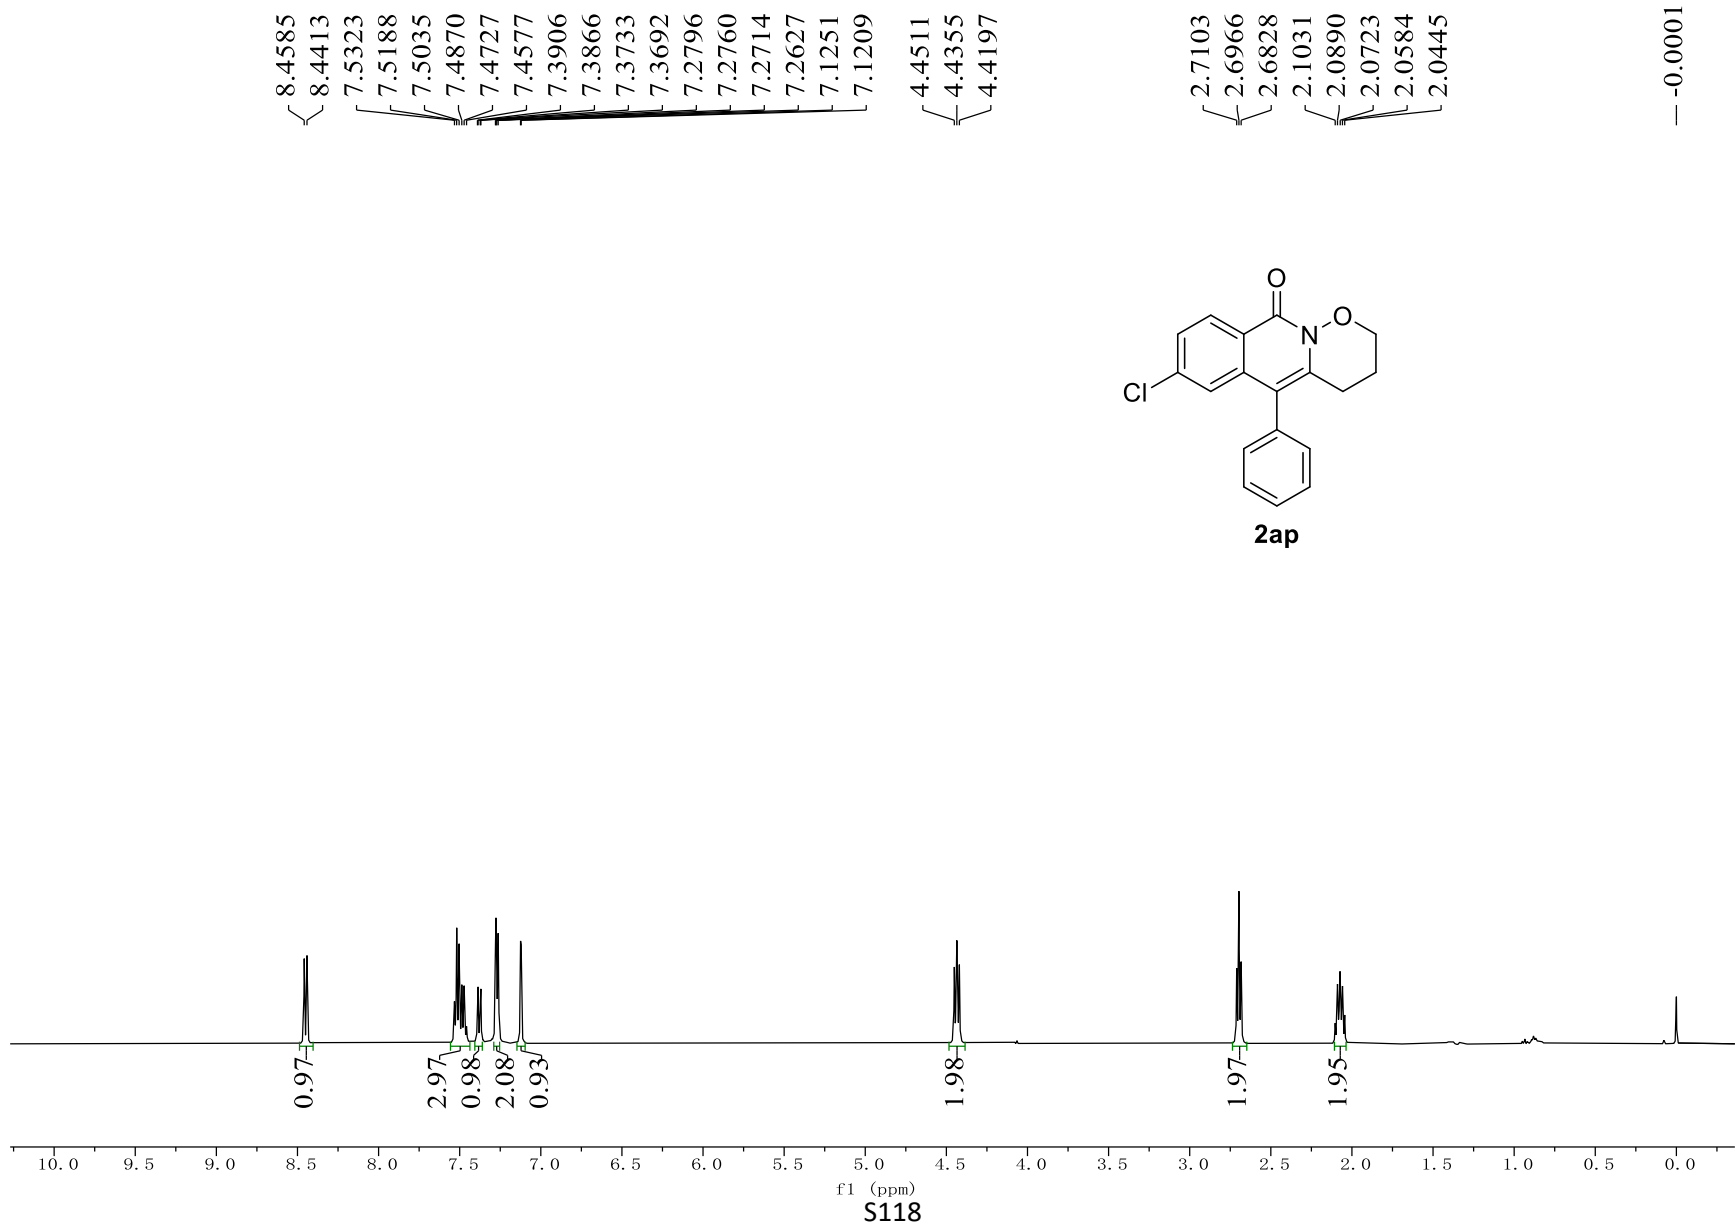

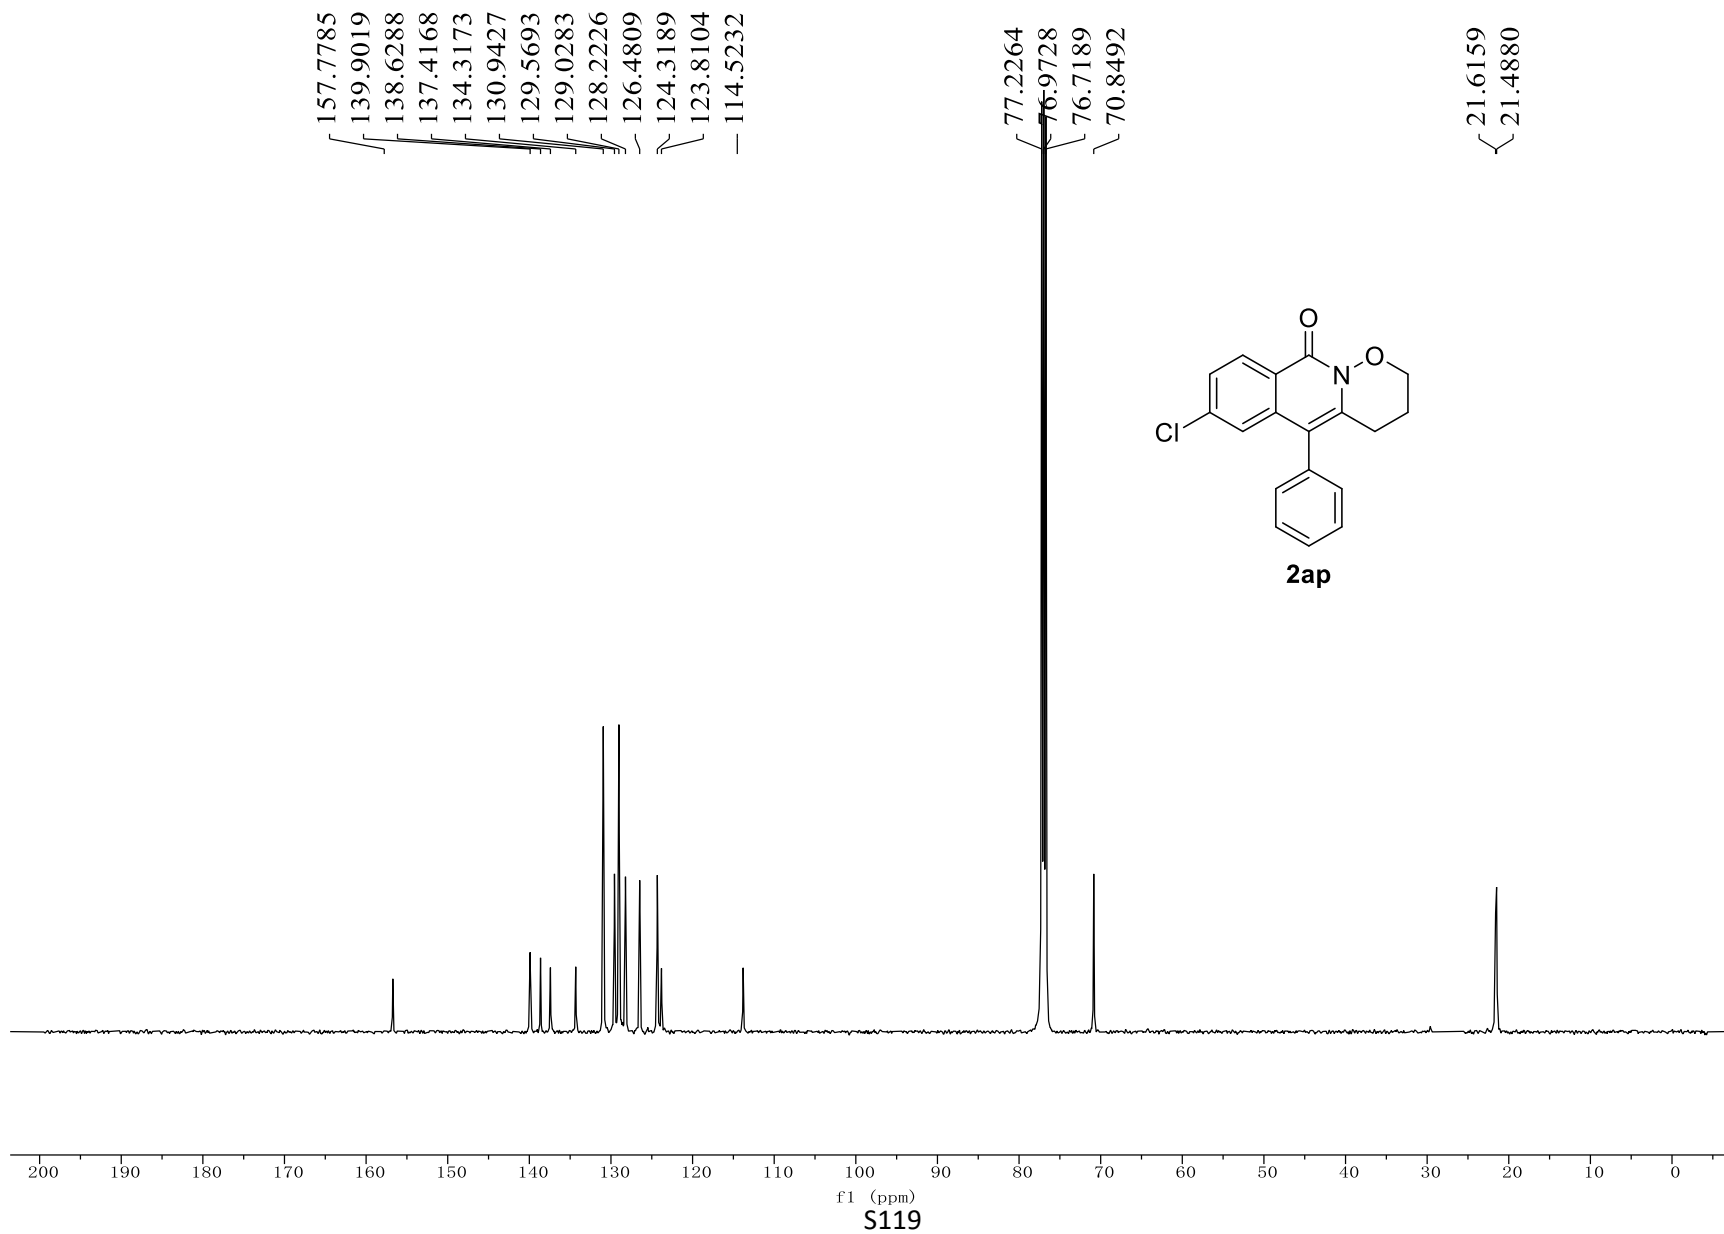



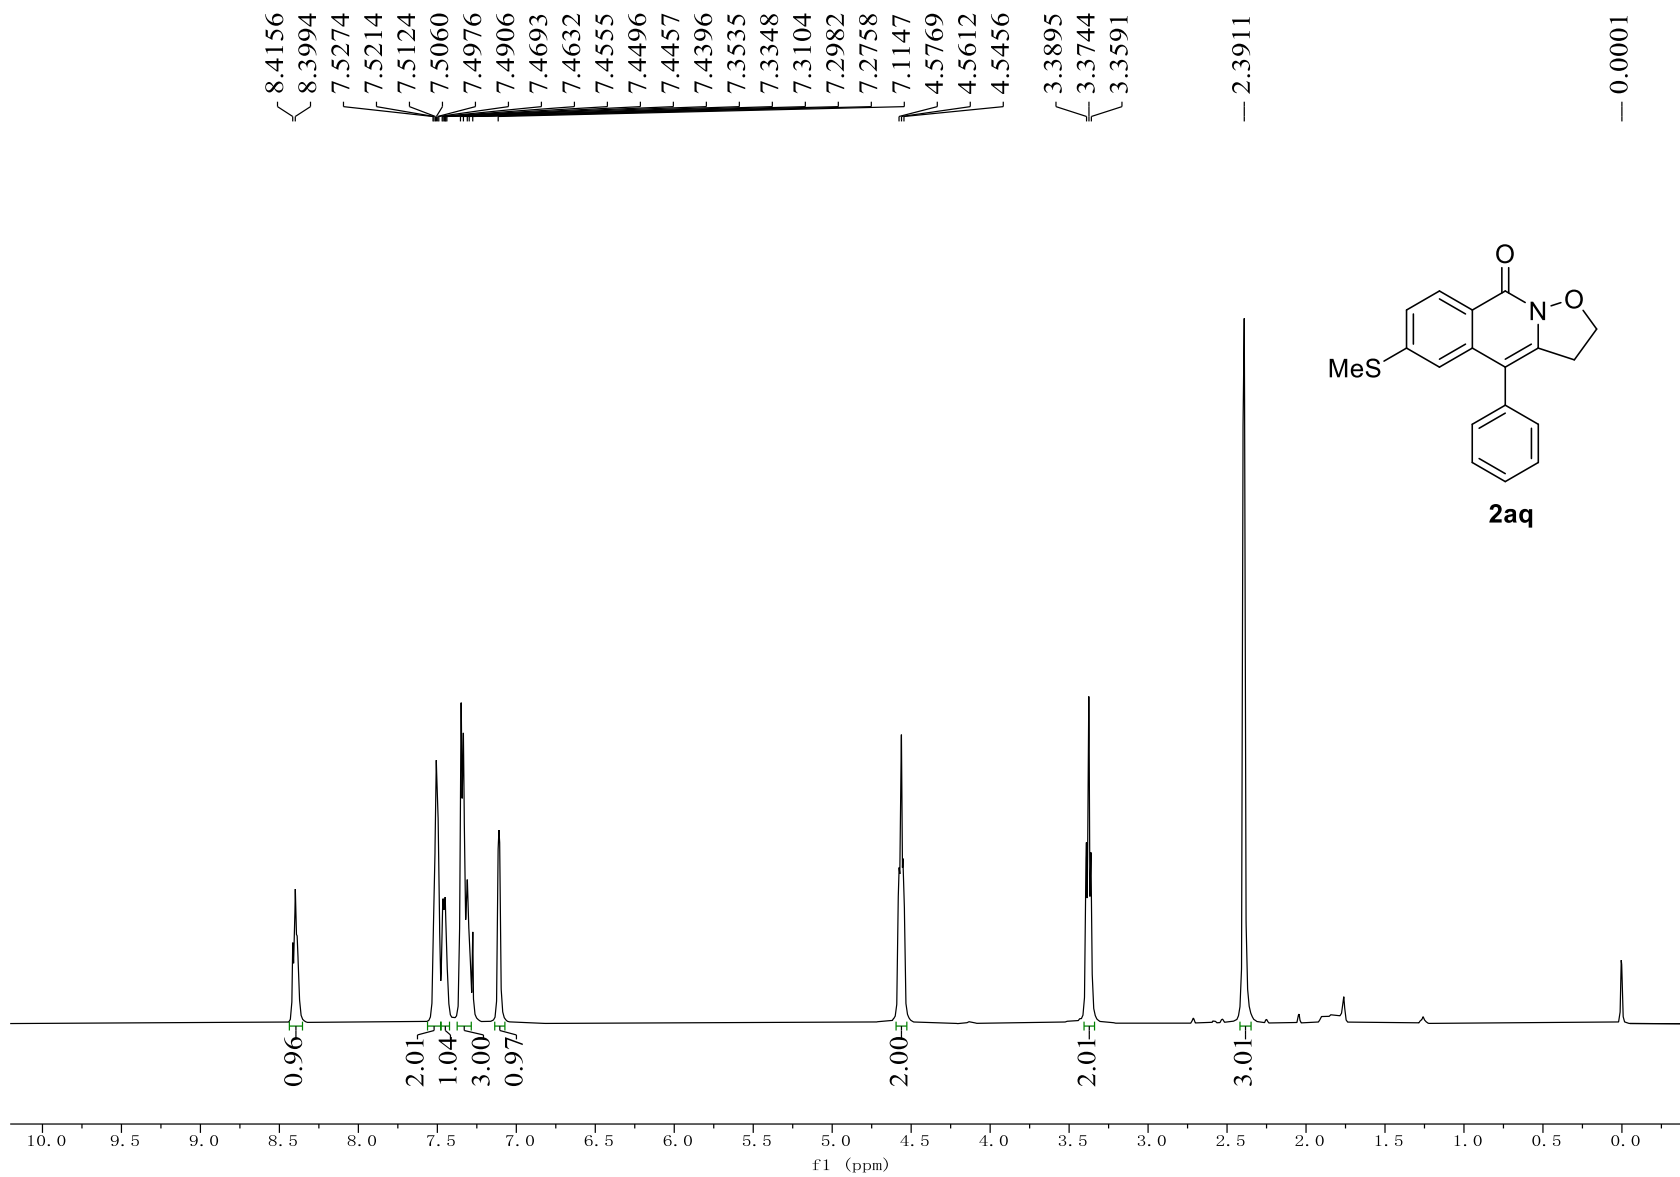

S120

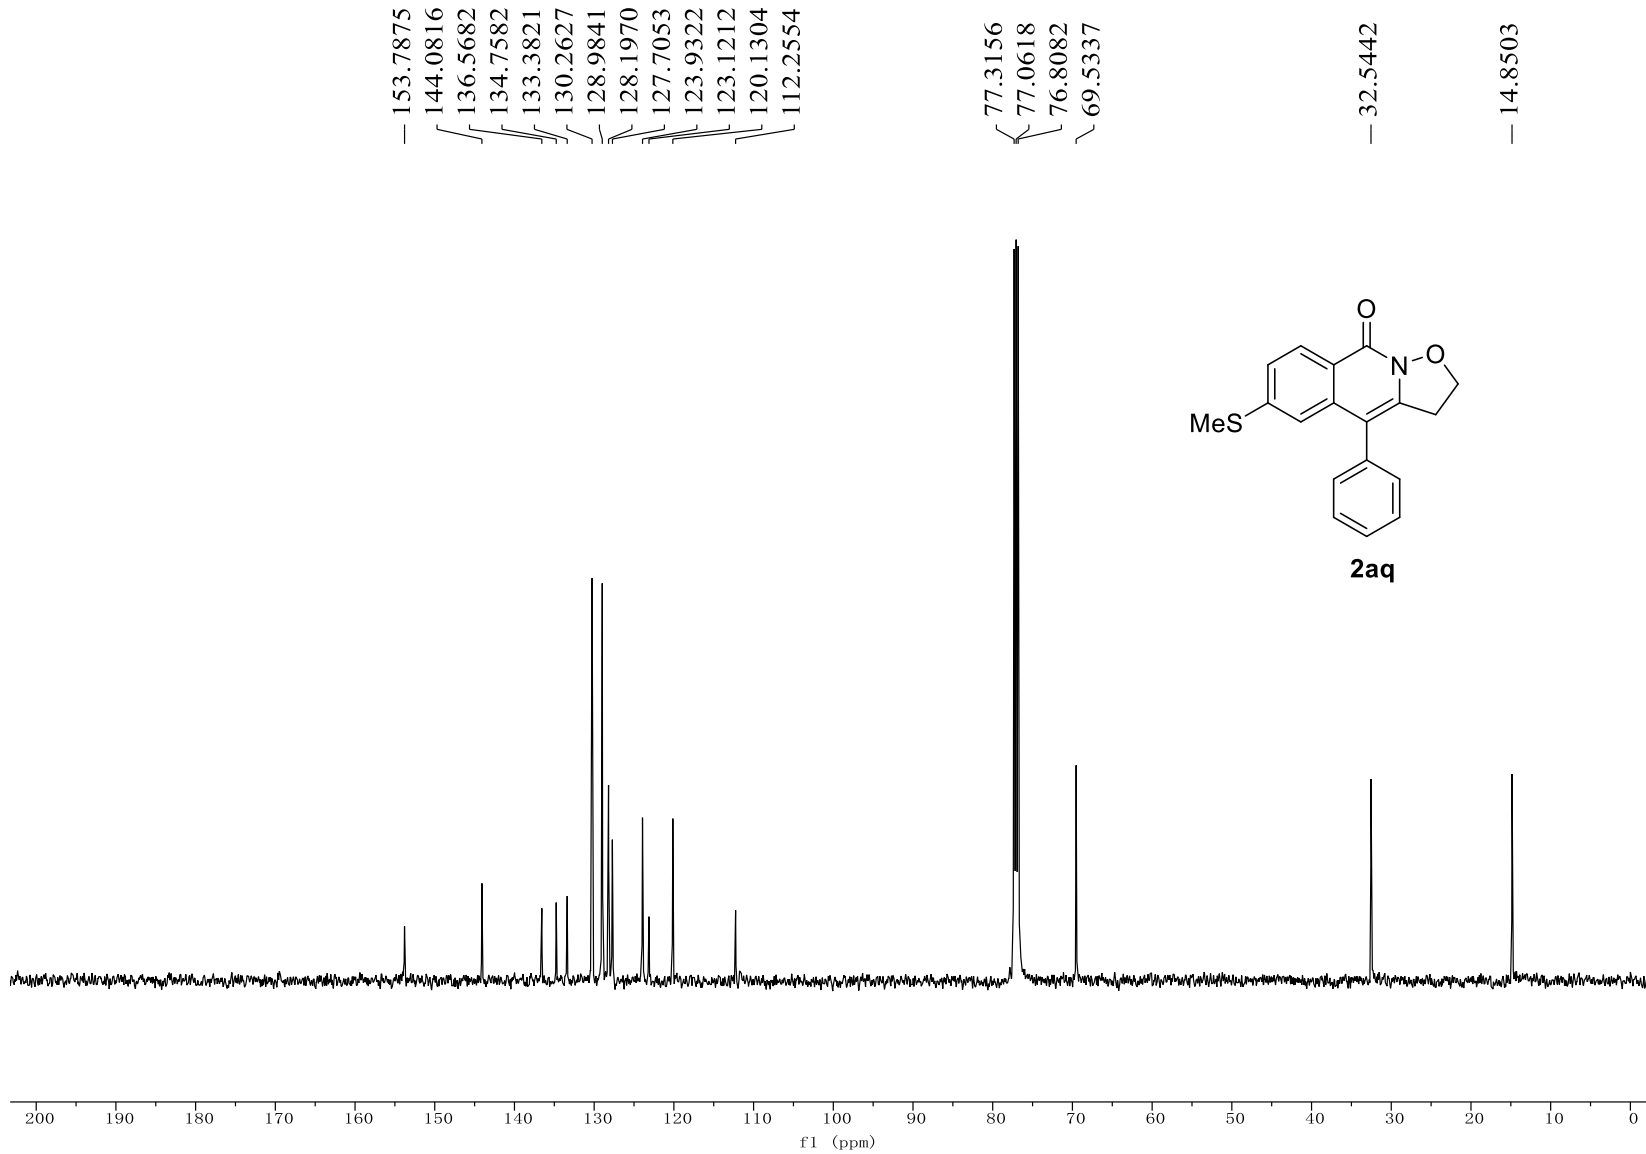

S121
